# Supplementary material for: Similarities and Differences in Gene Expression Networks Between the Breast Cancer Cell Line Michigan Cancer Foundation-7 and Invasive Human Breast Cancer Tissues
Source: Frontiers journal article supplement (doi:10.3389/frai.2021.674370), 2021-05-13
Supplement: Data_Sheet_1.zip [file Data_Sheet_1.zip]

Count

0 5000 10000 15000 20000 25000 30000

8692\_at|RPS3  
\_s\_at|RPL37A  
\_5\_s\_at|RPS14  
3\_x\_at|RPS4X  
\_11\_s\_at|RPS16  
4\_s\_at|RPS19  
\_92\_s\_at|RPL37  
\_926\_at|RPS23  
\_0002\_at|RPL35  
\_0\_x\_at|RPS16  
646\_at|RPS14  
\_17\_x\_at|RPS9  
\_9\_s\_at|RPLP2  
\_33\_s\_at|RPL13  
54\_x\_at|RPL4  
\_029\_at|RPL19  
\_s\_at|RPL35A  
\_2\_s\_at|RPL36  
\_6\_s\_at|RPL15  
\_33\_s\_at|RPL28  
\_9\_x\_at|RPL38  
\_0\_s\_at|UBA52  
\_37\_s\_at|RPL5  
at|RPL18AP16  
\_11\_at|RPL22L1  
\_x\_at|RPS10P5  
\_s\_at|MRPL41  
\_at|RPS6KB1  
787\_at|MRPL3  
\_s\_at|MRPS15  
\_s\_at|MRPS33  
\_1\_at|RPS6KB1  
\_s\_at|MRPL57  
\_27\_at|MRPL15  
\_3\_x\_at|RPL7L1  
\_s\_at|MRPL27  
\_s\_at|MRPL36  
\_17\_at|MRPL49  
\_45\_at|MRPS27  
\_s\_at|MRPL57  
\_s\_at|MRPS11  
\_70\_at|MRPL24  
\_s\_at|MRPL13  
\_12\_at|MRPS34  
\_s\_at|MRPL52  
\_s\_at|MRPL14  
\_401\_at|PRPS2  
\_6\_at|RPS10P2  
\_s\_at|MRPL39  
\_s\_at|MRPS16  
\_3\_s\_at|MRPL4  
\_at|RPL22P22  
\_3\_s\_at|MRPS5  
\_223\_at|RPL28  
\_7\_at|RPL35P8  
\_s\_at|MRPL42  
\_s\_at|MRPL50  
\_04\_at|MRPS31  
\_80\_at|MRPL50  
\_3\_at|MRPS18B  
\_s\_at|MRPL30  
\_81\_at|MRPL48  
\_s\_at|MRPL17  
\_s\_at|MRPL28  
\_s\_at|MRPS10  
\_x\_at|MRPS22  
\_x\_x\_at|MRPS10  
\_s\_at|MRPL51  
\_15\_at|RPL39L  
\_7\_at|RPSAP20  
\_59\_at|RPL10L  
\_7\_s\_at|MRPS5  
\_68\_at|MRPL58  
\_x\_x\_at|MRPL44  
\_s\_at|RPS6KA5  
\_s\_at|MRPS10  
\_5\_at|RPS6KA3  
\_3\_at|RPS6KA3  
\_35\_at|RPS27L  
\_2\_at|RPS6KA2  
\_2\_at|RPS6KA4  
\_33\_s\_at|RPL31  
\_48\_at|MRPS25  
\_9\_at|RPS4XP3  
\_s\_at|MRPL44
