# Supplementary material for: Similarities and Differences in Gene Expression Networks Between the Breast Cancer Cell Line Michigan Cancer Foundation-7 and Invasive Human Breast Cancer Tissues
Source: Frontiers journal article supplement (doi:10.3389/frai.2021.674370), 2021-05-13
Supplement: Data_Sheet_1.zip [file Data_Sheet_1.zip]

## Sheet: Sheet1
search_term	uniprot_accession	gene_name	description	ec_number	synonyms	location	keywords	go_terms	family	zinc_link	cansar_link	nearest_drug_target	matching_drug_target_50	matching_drug_target_35	number_of_3d_structure	number_of_3d_structure_with_small_molecule_ligand	number_of_3d_structure_with_druggability	number_of_3d_structure_druggable	percentage_of_3d_structure_druggable	number_of_3d_structure_tractable	percentage_of_3d_structure_tractable	ligand_druggability_score	ligand_druggability_percentile_rank	matching_protein_variants	screened_compounds	screened_compounds_active	screened_compounds_active_ro5	screened_fragments	screened_fragments_active	screened_fragments_active_ro5	most_prevalent_mutation	most_prevalent_cnv	highest_expressing_celllines
	P02452	COL1A1	Collagen alpha-1(I) chain		CO1A1_HUMAN, COL1A1	Secreted, Extracellular space, Extracellular matrix	P02452 CO1A1_HUMAN Collagen alpha-1(I) chain P02452,O76045,P78441,Q13896,Q13902,Q13903,Q14037,Q14992,Q15176,Q15201,Q16050,Q59F64,Q7KZ30,Q7KZ34,Q8IVI5,Q8N473,Q9UML6,Q9UMM7 Alpha-1 type I collagen	collagen type i trimer, collagen-containing extracellular matrix, cytoplasm, endoplasmic reticulum lumen, extracellular matrix, extracellular region, extracellular space, golgi apparatus, secretory granule	fibrillar collagen family	http://zinc.docking.org/results/combination?filter.purchasability=purchasable&annotation.name=CO1A1_HUMAN	http://cansar.icr.ac.uk/cansar/molecular-targets/P02452/				11	5	5	0	0	1	20	-0.95	69
	P02751	FN1	Fibronectin		FINC_HUMAN, FN1, FN	Secreted, Extracellular space, Extracellular matrix	P02751 FINC_HUMAN Fibronectin P02751,B7ZLF0,E9PE77,E9PG29,O95609,O95610,Q14312,Q14325,Q14326,Q17RV7,Q53S27,Q564H7,Q585T2,Q59EH1,Q60FE4,Q68DP8,Q68DP9,Q68DT4,Q6LDP6,Q6MZS0,Q6MZU5,Q6N025,Q6N0A6,Q7Z391,Q86T27,Q8IVI8,Q96KP7,Q96KP8,Q96KP9,Q9H1B8,Q9HAP3,Q9UMK2 Cold-insoluble globulin FN	apical plasma membrane, basement membrane, blood microparticle, collagen-containing extracellular matrix, endoplasmic reticulum lumen, endoplasmic reticulum-golgi intermediate compartment, extracellular exosome, extracellular matrix, extracellular region, extracellular space, fibrinogen complex, platelet alpha granule lumen		http://zinc.docking.org/results/combination?filter.purchasability=purchasable&annotation.name=FINC_HUMAN	http://cansar.icr.ac.uk/cansar/molecular-targets/P02751/				60	8	59	9	16	33	56	-0.35	75	1	4	4	0	1	1	0
	P08123	COL1A2	Collagen alpha-2(I) chain		CO1A2_HUMAN, COL1A2	Secreted, Extracellular space, Extracellular matrix	P08123 CO1A2_HUMAN Collagen alpha-2(I) chain P08123,P02464,Q13897,Q13997,Q13998,Q14038,Q14057,Q15177,Q15947,Q16480,Q16511,Q7Z5S6,Q9UEB6,Q9UEF9,Q9UM83,Q9UMI1,Q9UML5,Q9UMM6,Q9UPH0 Alpha-2 type I collagen	collagen type i trimer, collagen-containing extracellular matrix, endoplasmic reticulum, endoplasmic reticulum lumen, extracellular exosome, extracellular matrix, extracellular region, extracellular space	fibrillar collagen family	http://zinc.docking.org/results/combination?filter.purchasability=purchasable&annotation.name=CO1A2_HUMAN	http://cansar.icr.ac.uk/cansar/molecular-targets/P08123/				4	1	4	0	0	0	0	-1.35	65	1	1	0	0	1	0	0
	P02461	COL3A1	Collagen alpha-1(III) chain		CO3A1_HUMAN, COL3A1	Secreted, Extracellular space, Extracellular matrix	P02461 CO3A1_HUMAN Collagen alpha-1(III) chain P02461,D2JYH5,D3DPH4,P78429,Q15112,Q16403,Q53S91,Q541P8,Q6LDB3,Q6LDJ2,Q6LDJ3,Q7KZ56,Q8N6U4,Q9UC88,Q9UC89,Q9UC90,Q9UC91,R4N3C5,V9GZI1	collagen type iii trimer, collagen-containing extracellular matrix, endoplasmic reticulum lumen, extracellular matrix, extracellular region, extracellular space	fibrillar collagen family	http://zinc.docking.org/results/combination?filter.purchasability=purchasable&annotation.name=CO3A1_HUMAN	http://cansar.icr.ac.uk/cansar/molecular-targets/P02461/				8	3	7	1	15	5	72	-3	59
	P60709	ACTB	Actin, cytoplasmic 1		ACTB_HUMAN, ACTB	Cytoplasm, Cytoskeleton, Nucleus	P60709 ACTB_HUMAN Actin, cytoplasmic 1 P60709,P02570,P70514,P99021,Q11211,Q64316,Q75MN2,Q96B34,Q96HG5 Beta-actin	actin cytoskeleton, actin filament, adherens junction, apical junction complex, axon, blood microparticle, calyx of held, cell-cell junction, cortical cytoskeleton, cytoplasm, cytoplasmic ribonucleoprotein granule, cytoskeleton, cytosol, dense body, extracellular exosome, extracellular space, focal adhesion, glutamatergic synapse, lamellipodium, membrane, nua4 histone acetyltransferase complex, n…	actin family	http://zinc.docking.org/results/combination?filter.purchasability=purchasable&annotation.name=ACTB_HUMAN	http://cansar.icr.ac.uk/cansar/molecular-targets/P60709/				35	19	23	22	96	23	100	-3	59	1	7	0	0	7	0	0
	P68104	EEF1A1	Elongation factor 1-alpha 1		EF1A1_HUMAN, EEF1A1, EEF1A, EF1A, LENG7	Cytoplasm, Nucleus, Nucleus, Nucleolus, Cell membrane	P68104 EF1A1_HUMAN Elongation factor 1-alpha 1 P68104,P04719,P04720,Q6IQ15 Elongation factor Tu, Eukaryotic elongation factor 1 A-1, Leukocyte receptor cluster member 7 EEF1A, EF1A, LENG7	cortical actin cytoskeleton, cytoplasm, cytoplasmic side of lysosomal membrane, cytosol, eukaryotic translation elongation factor 1 complex, extracellular exosome, extracellular region, extracellular space, ficolin-1-rich granule lumen, membrane, nucleolus, nucleus, plasma membrane, ruffle membrane, secretory granule lumen	Classic translation factor GTPase family	http://zinc.docking.org/results/combination?filter.purchasability=purchasable&annotation.name=EF1A1_HUMAN	http://cansar.icr.ac.uk/cansar/molecular-targets/P68104/				0	0	0	0	0	0	0	-1.45	64	1	18	2	0	15	2	0
	P09486	SPARC	SPARC		SPRC_HUMAN, SPARC, ON	Secreted, Extracellular space, Extracellular matrix, Basement membrane	P09486 SPRC_HUMAN SPARC P09486,D3DQH9,Q6IBK4 Basement-membrane protein 40, Osteonectin, Secreted protein acidic and rich in cysteine ON	basement membrane, cell surface, collagen-containing extracellular matrix, cytoplasm, endocytic vesicle lumen, extracellular region, extracellular space, glutamatergic synapse, intracellular membrane-bounded organelle, nuclear matrix, platelet alpha granule, platelet alpha granule lumen, platelet alpha granule membrane	SPARC family	http://zinc.docking.org/results/combination?filter.purchasability=purchasable&annotation.name=SPRC_HUMAN	http://cansar.icr.ac.uk/cansar/molecular-targets/P09486/				4	0	4	1	25	2	50	0.55	85
	P08493	MGP	Matrix Gla protein		MGP_HUMAN, MGP, MGLAP	Secreted	P08493 MGP_HUMAN Matrix Gla protein P08493,A0M8W5,B2R519,J3KMX7,Q2TU41,Q567P9,Q6ICN5 Cell growth-inhibiting gene 36 protein MGLAP	collagen-containing extracellular matrix, extracellular exosome, extracellular matrix	osteocalcin/matrix Gla protein family	http://zinc.docking.org/results/combination?filter.purchasability=purchasable&annotation.name=MGP_HUMAN	http://cansar.icr.ac.uk/cansar/molecular-targets/P08493/				0	0	0	0	0	0	0	-3	59
	P17861	XBP1	X-box-binding protein 1		XBP1_HUMAN, XBP1, TREB5, XBP2	Endoplasmic reticulum, Nucleus, Cytoplasm, Endoplasmic reticulum membrane, Endoplasmic reticulum membrane, Membrane, Nucleus, Cytoplasm, Cytoplasm, Nucleus	P17861 XBP1_HUMAN X-box-binding protein 1 P17861,Q8WYK6,Q969P1,Q96BD7 Tax-responsive element-binding protein 5 TREB5, XBP2	cytoplasm, cytosol, endoplasmic reticulum, integral component of endoplasmic reticulum membrane, nucleoplasm, nucleus	bZIP family	http://zinc.docking.org/results/combination?filter.purchasability=purchasable&annotation.name=XBP1_HUMAN	http://cansar.icr.ac.uk/cansar/molecular-targets/P17861/				0	0	0	0	0	0	0	-0.45	74	1	54	1	1	20	1	1
	P63261	ACTG1	Actin, cytoplasmic 2		ACTG_HUMAN, ACTG1, ACTG	Cytoplasm, Cytoskeleton	P63261 ACTG_HUMAN Actin, cytoplasmic 2 P63261,A8K7C2,P02571,P14104,P99022,Q5U032,Q96E67 Gamma-actin ACTG	actin filament, apical junction complex, blood microparticle, calyx of held, cell-cell junction, cytoskeleton, cytosol, dense body, extracellular exosome, extracellular space, filamentous actin, focal adhesion, membrane, myofibril, nucleus, phagocytic vesicle, plasma membrane, schaffer collateral - ca1 synapse	actin family	http://zinc.docking.org/results/combination?filter.purchasability=purchasable&annotation.name=ACTG_HUMAN	http://cansar.icr.ac.uk/cansar/molecular-targets/P63261/				8	1	4	3	75	4	100	-3	59
	P04406	GAPDH	Glyceraldehyde-3-phosphate dehydrogenase	1.2.1.12	G3P_HUMAN, GAPDH, GAPD	Cytoplasm, Cytosol, Nucleus, Cytoplasm, Perinuclear region, Membrane, Cytoplasm, Cytoskeleton	P04406 G3P_HUMAN Glyceraldehyde-3-phosphate dehydrogenase P04406,E7EUT4,P00354,Q53X65 Peptidyl-cysteine S-nitrosylase GAPDH GAPD	cytoplasm, cytosol, extracellular exosome, gait complex, intracellular membrane-bounded organelle, lipid droplet, membrane, microtubule cytoskeleton, nuclear membrane, nucleus, perinuclear region of cytoplasm, plasma membrane, ribonucleoprotein complex, vesicle	glyceraldehyde-3-phosphate dehydrogenase family	http://zinc.docking.org/results/combination?filter.purchasability=purchasable&annotation.name=G3P_HUMAN	http://cansar.icr.ac.uk/cansar/molecular-targets/P04406/				11	11	11	11	100	11	100	-1.55	63	1	161	1	0	73	1	0
	Q09666	AHNAK	Neuroblast differentiation-associated protein AHNAK		AHNK_HUMAN, AHNAK, PM227	Nucleus	Q09666 AHNK_HUMAN Neuroblast differentiation-associated protein AHNAK Q09666,A1A586 Desmoyokin PM227	actin cytoskeleton, cell-cell contact zone, costamere, cytoplasm, cytosol, extracellular exosome, focal adhesion, lysosomal membrane, membrane, nucleus, plasma membrane, sarcolemma, t-tubule, vesicle		http://zinc.docking.org/results/combination?filter.purchasability=purchasable&annotation.name=AHNK_HUMAN	http://cansar.icr.ac.uk/cansar/molecular-targets/Q09666/				3	0	0	0	0	0	0	-0.4	75
	P0C0L4	C4A	Complement C4-A		CO4A_HUMAN, C4A, CO4, CPAMD2	Secreted, Cell junction, Synapse, Cell projection, Axon, Cell projection, Dendrite	P0C0L4 CO4A_HUMAN Complement C4-A P0C0L4,A6H8M8,A6NHJ5,A7E2V2,B0QZR6,B0V2C8,B2RUT6,B7ZVZ6,P01028,P78445,Q13160,Q13906,Q14033,Q14835,Q4LE82,Q5JNX2,Q5JQM8,Q6P4R1,Q6U2E5,Q6U2E8,Q6U2F0,Q6U2F3,Q6U2F4,Q6U2F6,Q6U2F8,Q6U2G0,Q96EG2,Q96SA8,Q9NPK5,Q9UIP5 Acidic complement C4, C3 and PZP-like alpha-2-macroglobulin domain-containing protein 2 CO4, CPAMD2	axon, blood microparticle, dendrite, endoplasmic reticulum lumen, extracellular exosome, extracellular region, extracellular space, neuronal cell body, plasma membrane, synapse		http://zinc.docking.org/results/combination?filter.purchasability=purchasable&annotation.name=CO4A_HUMAN	http://cansar.icr.ac.uk/cansar/molecular-targets/P0C0L4/				8	5	8	5	63	8	100	0.3	83
	P61769	B2M	Beta-2-microglobulin		B2MG_HUMAN, B2M	Secreted, Cell surface	P61769 B2MG_HUMAN Beta-2-microglobulin P61769,P01884,Q540F8,Q6IAT8,Q9UCK0,Q9UD48,Q9UDF4	cytosol, early endosome lumen, early endosome membrane, endoplasmic reticulum lumen, er to golgi transport vesicle membrane, external side of plasma membrane, extracellular exosome, extracellular region, extracellular space, focal adhesion, golgi apparatus, golgi membrane, hfe-transferrin receptor complex, membrane, mhc class i peptide loading complex, mhc class i protein complex, phagocytic vesi…	beta-2-microglobulin family	http://zinc.docking.org/results/combination?filter.purchasability=purchasable&annotation.name=B2MG_HUMAN	http://cansar.icr.ac.uk/cansar/molecular-targets/P61769/				855	34	845	13	2	391	47	-3	59	1	7	0	0	4	0	0
	P04233	CD74	HLA class II histocompatibility antigen gamma chain		HG2A_HUMAN, CD74, DHLAG	Cell membrane, Endoplasmic reticulum membrane, Golgi apparatus, Trans-Golgi network, Endosome, Lysosome	P04233 HG2A_HUMAN HLA class II histocompatibility antigen gamma chain P04233,A8K7R1,B4DNE8,D3DQG3,D3DQG4,Q14597,Q29832,Q5U0J8,Q8SNA0,Q8WLP6 HLA-DR antigens-associated invariant chain, Ia antigen-associated invariant chain, p33 DHLAG	cell surface, clathrin-coated endocytic vesicle membrane, cytoplasm, endocytic vesicle membrane, er to golgi transport vesicle membrane, external side of plasma membrane, extracellular exosome, golgi membrane, integral component of lumenal side of endoplasmic reticulum membrane, integral component of membrane, lysosomal lumen, lysosomal membrane, macrophage migration inhibitory factor receptor co…		http://zinc.docking.org/results/combination?filter.purchasability=purchasable&annotation.name=HG2A_HUMAN	http://cansar.icr.ac.uk/cansar/molecular-targets/P04233/				15	1	4	0	0	2	50	0.5	85	1	116	0	0	42	0	0
	P13693	TPT1	Translationally-controlled tumor protein		TCTP_HUMAN, TPT1	Cytoplasm	P13693 TCTP_HUMAN Translationally-controlled tumor protein P13693,B2R7E5,Q6YLS2,Q7Z4J4,Q8TBK7,Q96EE2,Q9UC70 Fortilin, Histamine-releasing factor, p23	cytoplasm, cytoplasmic microtubule, cytosol, extracellular exosome, extracellular space, multivesicular body, nucleus, spindle pole	TCTP family	http://zinc.docking.org/results/combination?filter.purchasability=purchasable&annotation.name=TCTP_HUMAN	http://cansar.icr.ac.uk/cansar/molecular-targets/P13693/				8	0	7	0	0	6	86	-3	59
	P08727	KRT19	Keratin, type I cytoskeletal 19		K1C19_HUMAN, KRT19		P08727 K1C19_HUMAN Keratin, type I cytoskeletal 19 P08727,B2R874,Q5XG83,Q6NW33,Q7L5M9,Q96A53,Q96FV1,Q9BYF9,Q9P1Y4 Cytokeratin-19, Keratin-19	apicolateral plasma membrane, cell periphery, costamere, cytosol, dystrophin-associated glycoprotein complex, extracellular exosome, intermediate filament, plasma membrane, sarcolemma, terminal web, z disc	intermediate filament family	http://zinc.docking.org/results/combination?filter.purchasability=purchasable&annotation.name=K1C19_HUMAN	http://cansar.icr.ac.uk/cansar/molecular-targets/P08727/				0	0	0	0	0	0	0	-3	59
	P13639	EEF2	Elongation factor 2		EF2_HUMAN, EEF2, EF2	Cytoplasm, Nucleus	P13639 EF2_HUMAN Elongation factor 2 P13639,B2RMP5,D6W618,Q58J86 EF2	aggresome, cytoplasm, cytosol, extracellular exosome, extracellular region, ficolin-1-rich granule lumen, membrane, membrane raft, nucleus, plasma membrane, polysomal ribosome, ribonucleoprotein complex, secretory granule lumen, synapse	Classic translation factor GTPase family	http://zinc.docking.org/results/combination?filter.purchasability=purchasable&annotation.name=EF2_HUMAN	http://cansar.icr.ac.uk/cansar/molecular-targets/P13639/				0	0	0	0	0	0	0	1.1	91	1	6	0	0	6	0	0
	P12111	COL6A3	Collagen alpha-3(VI) chain		CO6A3_HUMAN, COL6A3	Secreted, Extracellular space, Extracellular matrix	P12111 CO6A3_HUMAN Collagen alpha-3(VI) chain P12111,A8MT30,B4E3U5,B7ZMJ7,E9PFQ6,E9PGQ9,Q16501,Q53QF4,Q53QF6	collagen type vi trimer, collagen-containing extracellular matrix, endoplasmic reticulum lumen, extracellular exosome, extracellular matrix, extracellular region, extracellular space, extracellular vesicle, sarcolemma	type VI collagen family	http://zinc.docking.org/results/combination?filter.purchasability=purchasable&annotation.name=CO6A3_HUMAN	http://cansar.icr.ac.uk/cansar/molecular-targets/P12111/				5	0	5	0	0	2	40	2.3	98
	Q15063	POSTN	Periostin		POSTN_HUMAN, POSTN, OSF2	Golgi apparatus, Secreted, Secreted, Extracellular space, Extracellular matrix	Q15063 POSTN_HUMAN Periostin Q15063,B1ALD8,C0IMJ1,C0IMJ2,C0IMJ4,D2KRH7,F5H628,Q15064,Q29XZ0,Q3KPJ5,Q5VSY5,Q8IZF9 Osteoblast-specific factor 2 OSF2	collagen-containing extracellular matrix, extracellular matrix, extracellular space, neuromuscular junction, trans-golgi network		http://zinc.docking.org/results/combination?filter.purchasability=purchasable&annotation.name=POSTN_HUMAN	http://cansar.icr.ac.uk/cansar/molecular-targets/Q15063/				3	1	3	3	100	3	100	0.15	81
	P02792	FTL	Ferritin light chain		FRIL_HUMAN, FTL		P02792 FRIL_HUMAN Ferritin light chain P02792,B2R4B9,Q6IBT7,Q7Z2W1,Q86WI9,Q8WU07,Q96AU9,Q96CU0,Q9BTZ8	autolysosome, azurophil granule lumen, cytoplasm, cytosol, extracellular exosome, extracellular region, intracellular ferritin complex, membrane	ferritin family	http://zinc.docking.org/results/combination?filter.purchasability=purchasable&annotation.name=FRIL_HUMAN	http://cansar.icr.ac.uk/cansar/molecular-targets/P02792/				6	0	6	0	0	5	84	-3	59
	P39023	RPL3	60S ribosomal protein L3		RL3_HUMAN, RPL3	Nucleus, Nucleolus, Cytoplasm	P39023 RL3_HUMAN 60S ribosomal protein L3 P39023,B2RDV9,Q15548,Q5I0G0 HIV-1 TAR RNA-binding protein B, Large ribosomal subunit protein uL3	cytoplasm, cytosol, cytosolic large ribosomal subunit, extracellular exosome, focal adhesion, nucleolus, nucleus, protein-containing complex, synapse	universal ribosomal protein uL3 family	http://zinc.docking.org/results/combination?filter.purchasability=purchasable&annotation.name=RL3_HUMAN	http://cansar.icr.ac.uk/cansar/molecular-targets/P39023/				0	0	0	0	0	0	0	-1	68
	P25311	AZGP1	Zinc-alpha-2-glycoprotein		ZA2G_HUMAN, AZGP1, ZAG, ZNGP1	Secreted	P25311 ZA2G_HUMAN Zinc-alpha-2-glycoprotein P25311,D6W5T8,O60386,Q5XKQ4,Q8N4N0 ZAG, ZNGP1	collagen-containing extracellular matrix, external side of plasma membrane, extracellular exosome, extracellular region, extracellular space, nucleus	MHC class I family	http://zinc.docking.org/results/combination?filter.purchasability=purchasable&annotation.name=ZA2G_HUMAN	http://cansar.icr.ac.uk/cansar/molecular-targets/P25311/				9	9	9	7	78	9	100	-3	59
	P04075	ALDOA	Fructose-bisphosphate aldolase A	4.1.2.13	ALDOA_HUMAN, ALDOA, ALDA	Cytoplasm, Myofibril, Sarcomere, I band, Cytoplasm, Myofibril, Sarcomere, M line	P04075 ALDOA_HUMAN Fructose-bisphosphate aldolase A P04075,B4DXI7,Q6FH76,Q6FI10,Q96B15,Q9BWD9,Q9UCN2 Lung cancer antigen NY-LU-1, Muscle-type aldolase ALDA	actin cytoskeleton, cytosol, extracellular exosome, extracellular region, extracellular space, ficolin-1-rich granule lumen, i band, m band, membrane, nucleus, platelet alpha granule lumen, secretory granule lumen, sperm head, tertiary granule lumen	class I fructose-bisphosphate aldolase family	http://zinc.docking.org/results/combination?filter.purchasability=purchasable&annotation.name=ALDOA_HUMAN	http://cansar.icr.ac.uk/cansar/molecular-targets/P04075/				4	1	4	4	100	4	100	-1.5	64	1	1	0	0	1	0	0
	P62701	RPS4X	40S ribosomal protein S4, X isoform		RS4X_HUMAN, RPS4X, CCG2, RPS4, SCAR	Cytoplasm	P62701 RS4X_HUMAN 40S ribosomal protein S4, X isoform P62701,P12631,P12750,P27576,P55831,Q14727,Q6IPY4 SCR10, Single copy abundant mRNA protein, Small ribosomal subunit protein eS4 CCG2, RPS4, SCAR	cytoplasmic ribonucleoprotein granule, cytosol, cytosolic small ribosomal subunit, extracellular exosome, focal adhesion, membrane, nucleoplasm, polysome, ribonucleoprotein complex, ribosome, small ribosomal subunit, synapse	eukaryotic ribosomal protein eS4 family	http://zinc.docking.org/results/combination?filter.purchasability=purchasable&annotation.name=RS4X_HUMAN	http://cansar.icr.ac.uk/cansar/molecular-targets/P62701/				15	0	15	6	40	15	100	-3	59
	P25063	CD24	Signal transducer CD24		CD24_HUMAN, CD24, CD24A	Cell membrane	P25063 CD24_HUMAN Signal transducer CD24 P25063,A0A087WYI6,B6EC88,Q16257,Q53XS0,R4I4T5 Small cell lung carcinoma cluster 4 antigen CD24A	anchored component of external side of plasma membrane, cell surface, membrane, membrane raft	CD24 family	http://zinc.docking.org/results/combination?filter.purchasability=purchasable&annotation.name=CD24_HUMAN	http://cansar.icr.ac.uk/cansar/molecular-targets/P25063/				0	0	0	0	0	0	0	-3	59
	P05787	KRT8	Keratin, type II cytoskeletal 8		K2C8_HUMAN, KRT8, CYK8	Cytoplasm, Nucleus, Nucleoplasm, Nucleus matrix	P05787 K2C8_HUMAN Keratin, type II cytoskeletal 8 P05787,A8K4H3,B0AZN5,F8VXB4,Q14099,Q14716,Q14717,Q53GJ0,Q6DHW5,Q6GMY0,Q6P4C7,Q96J60 Cytokeratin-8, Keratin-8, Type-II keratin Kb8 CYK8	apicolateral plasma membrane, cell-cell junction, costamere, cytoplasm, cytosol, dystrophin-associated glycoprotein complex, extracellular exosome, intermediate filament, intermediate filament cytoskeleton, keratin filament, nuclear matrix, nucleoplasm, nucleus, sarcolemma, z disc	intermediate filament family	http://zinc.docking.org/results/combination?filter.purchasability=purchasable&annotation.name=K2C8_HUMAN	http://cansar.icr.ac.uk/cansar/molecular-targets/P05787/				0	0	0	0	0	0	0	-3	59
	P15104	GLUL	Glutamine synthetase	6.3.1.2	GLNA_HUMAN, GLUL, GLNS	Cytoplasm, Cytosol, Microsome, Mitochondrion, Cell membrane	P15104 GLNA_HUMAN Glutamine synthetase P15104,Q499Y9,Q5T9Z1,Q7Z3W4,Q8IZ17 Glutamate--ammonia ligase, Palmitoyltransferase GLUL GLNS	axon terminus, cytoplasm, cytosol, extracellular exosome, glial cell projection, mitochondrion, myelin sheath, nucleus, perikaryon, plasma membrane, protein-containing complex, rough endoplasmic reticulum	glutamine synthetase family	http://zinc.docking.org/results/combination?filter.purchasability=purchasable&annotation.name=GLNA_HUMAN	http://cansar.icr.ac.uk/cansar/molecular-targets/P15104/				2	2	2	1	50	2	100	-0.8	71	1	40	7	5	11	6	4
	P01889	HLA-B	HLA class I histocompatibility antigen, B alpha chain		HLAB_HUMAN, HLA-B, HLAB	Cell membrane, Endoplasmic reticulum membrane	P01889 HLAB_HUMAN HLA class I histocompatibility antigen, B alpha chain P01889,A0A2I6Q7B5,B0V0B8,G3GN01,O02862,O02956,O02957,O02960,O19555,O19556,O19595,O19615,O19624,O19625,O19627,O19641,O19651,O19675,O19692,O19758,O19779,O19783,O46702,O62897,O62901,O62915,O62917,O62919,O77933,O77959,O78053,O78138,O78160,O78163,O78172,O78173,O78180,O78217,O95730,O98140,P01890,P03989,P10317,P10318,P10319,P10320,P…	cell surface, early endosome membrane, endoplasmic reticulum, er to golgi transport vesicle membrane, extracellular exosome, golgi apparatus, golgi membrane, integral component of lumenal side of endoplasmic reticulum membrane, integral component of plasma membrane, membrane, mhc class i protein complex, phagocytic vesicle membrane, plasma membrane, recycling endosome membrane, secretory granule …		http://zinc.docking.org/results/combination?filter.purchasability=purchasable&annotation.name=HLAB_HUMAN	http://cansar.icr.ac.uk/cansar/molecular-targets/P01889/				212	6	212	58	28	212	100	0	80
	P62917	RPL8	60S ribosomal protein L8		RL8_HUMAN, RPL8	Cytoplasm	P62917 RL8_HUMAN 60S ribosomal protein L8 P62917,A8K094,D3DWN2,P25120,Q567Q7,Q969V7,Q9BWQ9 Large ribosomal subunit protein uL2	cytosol, cytosolic large ribosomal subunit, focal adhesion, membrane, polysomal ribosome, postsynapse, postsynaptic density	universal ribosomal protein uL2 family	http://zinc.docking.org/results/combination?filter.purchasability=purchasable&annotation.name=RL8_HUMAN	http://cansar.icr.ac.uk/cansar/molecular-targets/P62917/				4	0	0	0	0	0	0	-3	59
	P11940	PABPC1	Polyadenylate-binding protein 1		PABP1_HUMAN, PABPC1, PAB1, PABP1, PABPC2	Cytoplasm, Cytoplasm, Stress granule, Nucleus, Cell projection, Lamellipodium	P11940 PABP1_HUMAN Polyadenylate-binding protein 1 P11940,Q15097,Q93004 PAB1, PABP1, PABPC2	catalytic step 2 spliceosome, cell leading edge, cytoplasm, cytoplasmic ribonucleoprotein granule, cytoplasmic stress granule, cytosol, extracellular exosome, focal adhesion, lamellipodium, membrane, nucleus, ribonucleoprotein complex	polyadenylate-binding protein type-1 family	http://zinc.docking.org/results/combination?filter.purchasability=purchasable&annotation.name=PABP1_HUMAN	http://cansar.icr.ac.uk/cansar/molecular-targets/P11940/				28	6	20	1	5	7	35	-1.1	67
	P02794	FTH1	Ferritin heavy chain	1.16.3.1	FRIH_HUMAN, FTH1, FTH, FTHL6		P02794 FRIH_HUMAN Ferritin heavy chain P02794,B3KNR5,Q3KRA8,Q3SWW1 Cell proliferation-inducing gene 15 protein FTH, FTHL6	autolysosome, cytoplasm, cytosol, extracellular exosome, extracellular region, ficolin-1-rich granule lumen, intracellular ferritin complex, nucleus, tertiary granule lumen	ferritin family	http://zinc.docking.org/results/combination?filter.purchasability=purchasable&annotation.name=FRIH_HUMAN	http://cansar.icr.ac.uk/cansar/molecular-targets/P02794/				59	10	59	5	9	54	92	-3	59
	Q13433	SLC39A6	Zinc transporter ZIP6		S39A6_HUMAN, SLC39A6, LIV1, ZIP6	Cell membrane	Q13433 S39A6_HUMAN Zinc transporter ZIP6 Q13433,B4DR49,B4E224,Q8IXR3,Q96HP5 Estrogen-regulated protein LIV-1, Solute carrier family 39 member 6, Zrt- and Irt-like protein 6 LIV1, ZIP6	cell surface, endoplasmic reticulum, integral component of plasma membrane, lamellipodium membrane, plasma membrane	ZIP transporter (TC 2.A.5) family	http://zinc.docking.org/results/combination?filter.purchasability=purchasable&annotation.name=S39A6_HUMAN	http://cansar.icr.ac.uk/cansar/molecular-targets/Q13433/				0	0	0	0	0	0	0	-3	59
	P08670	VIM	Vimentin		VIME_HUMAN, VIM	Cytoplasm, Cytoplasm, Cytoskeleton, Nucleus matrix, Cell membrane	P08670 VIME_HUMAN Vimentin P08670,B0YJC2,D3DRU4,Q15867,Q15868,Q15869,Q548L2,Q6LER9,Q8N850,Q96ML2,Q9NTM3	cell leading edge, cytoplasm, cytoskeleton, cytosol, extracellular exosome, focal adhesion, intermediate filament, intermediate filament cytoskeleton, neuron projection, nuclear matrix, peroxisome, phagocytic vesicle, plasma membrane, polysome, ribonucleoprotein complex	intermediate filament family	http://zinc.docking.org/results/combination?filter.purchasability=purchasable&annotation.name=VIME_HUMAN	http://cansar.icr.ac.uk/cansar/molecular-targets/P08670/				22	8	13	0	0	0	0	-3	59
	P01011	SERPINA3	Alpha-1-antichymotrypsin		AACT_HUMAN, SERPINA3, AACT	Secreted	P01011 AACT_HUMAN Alpha-1-antichymotrypsin P01011,B3KVQ7,Q13703,Q2TU87,Q2TU88,Q59GP9,Q6LBY8,Q6LDT7,Q6NSC9,Q8N177,Q96DW8,Q9UC47,Q9UNU9 Cell growth-inhibiting gene 24/25 protein, Serpin A3 AACT	azurophil granule lumen, blood microparticle, collagen-containing extracellular matrix, extracellular exosome, extracellular region, extracellular space, nucleus, platelet alpha granule lumen, secretory granule lumen	serpin family	http://zinc.docking.org/results/combination?filter.purchasability=purchasable&annotation.name=AACT_HUMAN	http://cansar.icr.ac.uk/cansar/molecular-targets/P01011/				24	12	24	23	96	24	100	-3	59	1	1	0	0	1	0	0
	P07339	CTSD	Cathepsin D	3.4.23.5	CATD_HUMAN, CTSD, CPSD	Lysosome, Melanosome, Secreted, Extracellular space	P07339 CATD_HUMAN Cathepsin D P07339,Q6IB57 CPSD	collagen-containing extracellular matrix, endosome membrane, extracellular exosome, extracellular region, extracellular space, ficolin-1-rich granule lumen, lysosomal lumen, lysosomal membrane, lysosome, melanosome, membrane raft, specific granule lumen, tertiary granule lumen	peptidase A1 family	http://zinc.docking.org/results/combination?filter.purchasability=purchasable&annotation.name=CATD_HUMAN	http://cansar.icr.ac.uk/cansar/molecular-targets/P07339/	42.97|P00797|REN|Aliskiren Fumarate,Aliskiren|Whole:::Protein		42.97|P00797|REN|Aliskiren Fumarate,Aliskiren|Whole:::Protein	9	9	9	6	67	9	100	0.85	89	1	3561	219	39	1371	117	23
	P62753	RPS6	40S ribosomal protein S6		RS6_HUMAN, RPS6		P62753 RS6_HUMAN 40S ribosomal protein S6 P62753,P08227,P10660,Q4VBY7,Q8N6Z7 Phosphoprotein NP33, Small ribosomal subunit protein eS6	cell body, cytoplasmic ribonucleoprotein granule, cytosol, cytosolic small ribosomal subunit, dendrite, endoplasmic reticulum, membrane, nucleolus, nucleoplasm, nucleus, ribonucleoprotein complex, small ribosomal subunit	eukaryotic ribosomal protein eS6 family	http://zinc.docking.org/results/combination?filter.purchasability=purchasable&annotation.name=RS6_HUMAN	http://cansar.icr.ac.uk/cansar/molecular-targets/P62753/				28	0	26	4	16	26	100	-3	59	1	22	0	0	15	0	0
	P08238	HSP90AB1	Heat shock protein HSP 90-beta		HS90B_HUMAN, HSP90AB1, HSP90B, HSPC2, HSPCB	Cytoplasm, Melanosome, Nucleus, Secreted, Cell membrane	P08238 HS90B_HUMAN Heat shock protein HSP 90-beta P08238,B2R5P0,Q5T9W7,Q9NQW0,Q9NTK6 Heat shock 84 kDa HSP90B, HSPC2, HSPCB	apical plasma membrane, aryl hydrocarbon receptor complex, axonal growth cone, basolateral plasma membrane, brush border membrane, cell surface, cytoplasm, cytosol, dendritic growth cone, extracellular exosome, extracellular region, ficolin-1-rich granule lumen, hsp90-cdc37 chaperone complex, inclusion body, lysosomal membrane, melanosome, membrane, mitochondrion, neuronal cell body, nucleoplasm,…	heat shock protein 90 family	http://zinc.docking.org/results/combination?filter.purchasability=purchasable&annotation.name=HS90B_HUMAN	http://cansar.icr.ac.uk/cansar/molecular-targets/P08238/				17	11	13	11	85	13	100	1.25	92	1	2181	355	231	867	171	112
	P24593	IGFBP5	Insulin-like growth factor-binding protein 5		IBP5_HUMAN, IGFBP5, IBP5	Secreted	P24593 IBP5_HUMAN Insulin-like growth factor-binding protein 5 P24593,Q5U0A3 IBP5	endoplasmic reticulum lumen, extracellular region, extracellular space, insulin-like growth factor binding protein complex, insulin-like growth factor ternary complex		http://zinc.docking.org/results/combination?filter.purchasability=purchasable&annotation.name=IBP5_HUMAN	http://cansar.icr.ac.uk/cansar/molecular-targets/P24593/				2	0	2	0	0	0	0	-0.65	72	1	16	4	4	7	3	3
	P07602	PSAP	Prosaposin		SAP_HUMAN, PSAP, GLBA, SAP1	Lysosome, Secreted	P07602 SAP_HUMAN Prosaposin P07602,P07292,P15793,P78538,P78541,P78546,P78547,P78558,Q53Y86,Q6IBQ6,Q92739,Q92740,Q92741,Q92742 Proactivator polypeptide GLBA, SAP1	aggresome, azurophil granule membrane, collagen-containing extracellular matrix, extracellular exosome, extracellular region, extracellular space, intracellular membrane-bounded organelle, late endosome, lysosomal lumen, lysosomal membrane, lysosome, plasma membrane		http://zinc.docking.org/results/combination?filter.purchasability=purchasable&annotation.name=SAP_HUMAN	http://cansar.icr.ac.uk/cansar/molecular-targets/P07602/				15	4	15	0	0	3	20	-3	59	1	2	0	0	2	0	0
	P07900	HSP90AA1	Heat shock protein HSP 90-alpha		HS90A_HUMAN, HSP90AA1, HSP90A, HSPC1, HSPCA	Nucleus, Cytoplasm, Melanosome, Cell membrane	P07900 HS90A_HUMAN Heat shock protein HSP 90-alpha P07900,A8K500,B3KPJ9,Q2PP14,Q5CAQ6,Q5CAQ7,Q9BVQ5 Heat shock 86 kDa, Lipopolysaccharide-associated protein 2, Renal carcinoma antigen NY-REN-38 HSP90A, HSPC1, HSPCA	axonal growth cone, cell surface, cytoplasm, cytosol, dendritic growth cone, endocytic vesicle lumen, extracellular exosome, extracellular region, ficolin-1-rich granule lumen, lysosomal lumen, melanosome, membrane, mitochondrion, myelin sheath, neuronal cell body, nucleoplasm, nucleus, perinuclear region of cytoplasm, plasma membrane, protein-containing complex, secretory granule lumen	heat shock protein 90 family	http://zinc.docking.org/results/combination?filter.purchasability=purchasable&annotation.name=HS90A_HUMAN	http://cansar.icr.ac.uk/cansar/molecular-targets/P07900/				300	279	292	170	59	292	100	1.25	92	1	2870	495	332	1068	242	170
	P62269	RPS18	40S ribosomal protein S18		RS18_HUMAN, RPS18, D6S218E	Cytoplasm	P62269 RS18_HUMAN 40S ribosomal protein S18 P62269,P25232,Q5SUJ3,Q6IPF8 Ke-3, Small ribosomal subunit protein uS13 D6S218E	cytosol, cytosolic small ribosomal subunit, extracellular exosome, focal adhesion, membrane, nucleoplasm, nucleus, postsynaptic density, ribosome, small ribosomal subunit	universal ribosomal protein uS13 family	http://zinc.docking.org/results/combination?filter.purchasability=purchasable&annotation.name=RS18_HUMAN	http://cansar.icr.ac.uk/cansar/molecular-targets/P62269/				26	0	26	5	20	23	89	0.9	89
	P35625	TIMP3	Metalloproteinase inhibitor 3		TIMP3_HUMAN, TIMP3	Secreted, Extracellular space, Extracellular matrix	P35625 TIMP3_HUMAN Metalloproteinase inhibitor 3 P35625,B2RBY9,Q5THV4,Q9UC74,Q9UGS2 Protein MIG-5, Tissue inhibitor of metalloproteinases 3	basement membrane, collagen-containing extracellular matrix, extracellular matrix, extracellular region, extracellular space, nucleus, platelet dense granule lumen	protease inhibitor I35 (TIMP) family	http://zinc.docking.org/results/combination?filter.purchasability=purchasable&annotation.name=TIMP3_HUMAN	http://cansar.icr.ac.uk/cansar/molecular-targets/P35625/				1	0	1	1	100	1	100	0.6	86
	P05067	APP	Amyloid-beta precursor protein		A4_HUMAN, APP, A4, AD1	Cell membrane, Membrane, Perikaryon, Cell projection, Growth cone, Membrane, Clathrin-coated pit, Early endosome, Cytoplasmic vesicle, Secreted, Cell surface, Nucleus, Cytoplasm	P05067 A4_HUMAN Amyloid-beta precursor protein P05067,B2R5V1,B4DII8,D3DSD1,D3DSD2,D3DSD3,P09000,P78438,Q13764,Q13778,Q13793,Q16011,Q16014,Q16019,Q16020,Q6GSC0,Q8WZ99,Q9BT38,Q9UC33,Q9UCA9,Q9UCB6,Q9UCC8,Q9UCD1,Q9UQ58 ABPP, APPI, Alzheimer disease amyloid protein, Amyloid precursor protein, Amyloid-beta A4 protein, Cerebral vascular amyloid peptide, PreA4, Protease nexin-II A4, AD1	amyloid-beta complex, apical part of cell, astrocyte projection, axon, cell, cell surface, cell-cell junction, ciliary rootlet, clathrin-coated pit, copii-coated er to golgi transport vesicle, cytoplasm, cytosol, dendritic shaft, dendritic spine, early endosome, endoplasmic reticulum lumen, endosome, endosome lumen, endosome to plasma membrane transport vesicle, extracellular exosome, extracellul…	APP family	http://zinc.docking.org/results/combination?filter.purchasability=purchasable&annotation.name=A4_HUMAN	http://cansar.icr.ac.uk/cansar/molecular-targets/P05067/				147	12	57	3	6	22	39	0.7	87	1	3470	479	361	1237	133	90
	P21333	FLNA	Filamin-A		FLNA_HUMAN, FLNA, FLN, FLN1	Cytoplasm, Cell cortex, Cytoplasm, Cytoskeleton, Perikaryon, Cell projection, Growth cone	P21333 FLNA_HUMAN Filamin-A P21333,E9KL45,Q5HY53,Q5HY55,Q8NF52 Actin-binding protein 280, Alpha-filamin, Endothelial actin-binding protein, Filamin-1, Non-muscle filamin FLN, FLN1	actin cytoskeleton, actin filament, apical dendrite, cell-cell junction, cortical cytoskeleton, cytoplasm, cytosol, dendritic shaft, extracellular exosome, extracellular region, focal adhesion, glutamatergic synapse, growth cone, membrane, myb complex, nucleolus, nucleus, perikaryon, perinuclear region of cytoplasm, plasma membrane, postsynapse, z disc	filamin family	http://zinc.docking.org/results/combination?filter.purchasability=purchasable&annotation.name=FLNA_HUMAN	http://cansar.icr.ac.uk/cansar/molecular-targets/P21333/				22	1	22	4	19	13	60	0.45	84
	P07585	DCN	Decorin		PGS2_HUMAN, DCN, SLRR1B	Secreted, Extracellular space, Extracellular matrix	P07585 PGS2_HUMAN Decorin P07585,Q9P0Z0,Q9P0Z1,Q9Y5N8,Q9Y5N9 Bone proteoglycan II, PG-S2, PG40 SLRR1B	collagen type vi trimer, collagen-containing extracellular matrix, extracellular region, extracellular space, golgi lumen, lysosomal lumen	small leucine-rich proteoglycan (SLRP) family	http://zinc.docking.org/results/combination?filter.purchasability=purchasable&annotation.name=PGS2_HUMAN	http://cansar.icr.ac.uk/cansar/molecular-targets/P07585/	32.12|Q9NYK1|TLR7|Imiquimod|Whole:::Protein			0	0	0	0	0	0	0	-1	68
	P10909	CLU	Clusterin		CLUS_HUMAN, CLU, APOJ, CLI, KUB1	Secreted, Cytoplasm, Cytoplasm, Nucleus, Cytoplasm, Mitochondrion membrane, Cytoplasm, Cytosol, Microsome, Endoplasmic reticulum, Mitochondrion, Mitochondrion membrane, Cytoplasm, Perinuclear region, Cytoplasmic vesicle, Secretory vesicle, Chromaffin granule	P10909 CLUS_HUMAN Clusterin P10909,B2R9Q1,B3KSE6,P11380,P11381,Q2TU75,Q5HYC1,Q7Z5B9 Aging-associated gene 4 protein, Apolipoprotein J, Complement cytolysis inhibitor, Complement-associated protein SP-40,40, Ku70-binding protein 1, NA1/NA2, Sulfated glycoprotein 2, Testosterone-repressed prostate message 2 APOJ, CLI, KUB1	apical dendrite, blood microparticle, cell surface, chromaffin granule, collagen-containing extracellular matrix, cytoplasm, cytosol, extracellular exosome, extracellular region, extracellular space, golgi apparatus, intracellular membrane-bounded organelle, mitochondrial inner membrane, mitochondrion, neurofibrillary tangle, nucleus, perinuclear endoplasmic reticulum lumen, perinuclear region of…	clusterin family	http://zinc.docking.org/results/combination?filter.purchasability=purchasable&annotation.name=CLUS_HUMAN	http://cansar.icr.ac.uk/cansar/molecular-targets/P10909/				0	0	0	0	0	0	0	-3	59
	P05386	RPLP1	60S acidic ribosomal protein P1		RLA1_HUMAN, RPLP1, RRP1		P05386 RLA1_HUMAN 60S acidic ribosomal protein P1 P05386,A6NIB2 Large ribosomal subunit protein P1 RRP1	cytosol, cytosolic large ribosomal subunit, focal adhesion	eukaryotic ribosomal protein P1/P2 family	http://zinc.docking.org/results/combination?filter.purchasability=purchasable&annotation.name=RLA1_HUMAN	http://cansar.icr.ac.uk/cansar/molecular-targets/P05386/				2	0	2	0	0	0	0	-3	59
	P12110	COL6A2	Collagen alpha-2(VI) chain		CO6A2_HUMAN, COL6A2	Secreted, Extracellular space, Extracellular matrix, Membrane	P12110 CO6A2_HUMAN Collagen alpha-2(VI) chain P12110,Q13909,Q13910,Q13911,Q14048,Q14049,Q16259,Q16597,Q6P0Q1,Q9UML3,Q9Y4S8	collagen trimer, collagen-containing extracellular matrix, endoplasmic reticulum lumen, extracellular exosome, extracellular region, extracellular space, extracellular vesicle, protein-containing complex, sarcolemma	type VI collagen family	http://zinc.docking.org/results/combination?filter.purchasability=purchasable&annotation.name=CO6A2_HUMAN	http://cansar.icr.ac.uk/cansar/molecular-targets/P12110/				0	0	0	0	0	0	0	-3	59
	P11142	HSPA8	Heat shock cognate 71 kDa protein		HSP7C_HUMAN, HSPA8, HSC70, HSP73, HSPA10	Cytoplasm, Melanosome, Nucleus, Nucleolus, Cell membrane	P11142 HSP7C_HUMAN Heat shock cognate 71 kDa protein P11142,Q9H3R6 Heat shock 70 kDa protein 8, Lipopolysaccharide-associated protein 1 HSC70, HSP73, HSPA10	autophagosome, axon, blood microparticle, chaperone complex, clathrin-sculpted gamma-aminobutyric acid transport vesicle membrane, cytoplasm, cytosol, dendrite, extracellular exosome, extracellular region, extracellular space, ficolin-1-rich granule lumen, focal adhesion, glutamatergic synapse, glycinergic synapse, late endosome, lumenal side of lysosomal membrane, lysosomal lumen, lysosomal memb…	heat shock protein 70 family	http://zinc.docking.org/results/combination?filter.purchasability=purchasable&annotation.name=HSP7C_HUMAN	http://cansar.icr.ac.uk/cansar/molecular-targets/P11142/				46	36	43	42	98	43	100	-0.8	71	1	61	0	0	25	0	0
	P49327	FASN	Fatty acid synthase	2.3.1.85	FAS_HUMAN, FASN, FAS	Cytoplasm, Melanosome	P49327 FAS_HUMAN Fatty acid synthase P49327,Q13479,Q16702,Q4LE83,Q6P4U5,Q6SS02,Q969R1,Q96C68,Q96IT0 Type I fatty acid synthase FAS	cytosol, extracellular exosome, glycogen granule, golgi apparatus, melanosome, membrane, plasma membrane		http://zinc.docking.org/results/combination?filter.purchasability=purchasable&annotation.name=FAS_HUMAN	http://cansar.icr.ac.uk/cansar/molecular-targets/P49327/				13	7	13	12	93	12	93	1.05	91	1	1380	301	178	433	108	72
	P35579	MYH9	Myosin-9		MYH9_HUMAN, MYH9	Cytoplasm, Cytoskeleton, Cytoplasm, Cell cortex	P35579 MYH9_HUMAN Myosin-9 P35579,A8K6E4,O60805,Q60FE2,Q86T83 Cellular myosin heavy chain, type A, Myosin heavy chain 9, Myosin heavy chain, non-muscle IIa, Non-muscle myosin heavy chain A, Non-muscle myosin heavy chain IIa	actin cytoskeleton, actomyosin, actomyosin contractile ring, adherens junction, brush border, cell leading edge, cleavage furrow, cytoplasm, cytosol, extracellular exosome, focal adhesion, immunological synapse, membrane, myosin ii complex, myosin ii filament, neuromuscular junction, nucleus, plasma membrane, protein-containing complex, ruffle, spindle, stress fiber, uropod	Myosin family	http://zinc.docking.org/results/combination?filter.purchasability=purchasable&annotation.name=MYH9_HUMAN	http://cansar.icr.ac.uk/cansar/molecular-targets/P35579/				5	0	3	0	0	1	34	0.3	83	1	3	0	0	3	0	0
	P63104	YWHAZ	14-3-3 protein zeta/delta		1433Z_HUMAN, YWHAZ	Cytoplasm, Melanosome	P63104 1433Z_HUMAN 14-3-3 protein zeta/delta P63104,A8K1N0,B7Z465,P29213,P29312,Q32P43,Q5XJ08,Q6GPI2,Q6IN74,Q6NUR9,Q6P3U9,Q86V33 Protein kinase C inhibitor protein 1	blood microparticle, cytoplasm, cytosol, extracellular exosome, extracellular space, focal adhesion, glutamatergic synapse, hippocampal mossy fiber to ca3 synapse, melanosome, mitochondrion, nucleoplasm, nucleus, vesicle	14-3-3 family	http://zinc.docking.org/results/combination?filter.purchasability=purchasable&annotation.name=1433Z_HUMAN	http://cansar.icr.ac.uk/cansar/molecular-targets/P63104/				48	18	48	23	48	48	100	0.25	82	1	26	5	0	18	4	0
	O00767	SCD	Acyl-CoA desaturase	1.14.19.1	ACOD_HUMAN, SCD	Endoplasmic reticulum membrane	O00767 ACOD_HUMAN Acyl-CoA desaturase O00767,B2R5U0,D3DR68,Q16150,Q53GR9,Q5W037,Q5W038,Q6GSS4,Q96KF6,Q9BS07,Q9Y695 Delta(9)-desaturase, Fatty acid desaturase, Stearoyl-CoA desaturase	endoplasmic reticulum, endoplasmic reticulum membrane, integral component of endoplasmic reticulum membrane, integral component of membrane, membrane, nucleolus	fatty acid desaturase type 1 family	http://zinc.docking.org/results/combination?filter.purchasability=purchasable&annotation.name=ACOD_HUMAN	http://cansar.icr.ac.uk/cansar/molecular-targets/O00767/				1	1	1	1	100	1	100	1.4	94	1	654	250	207	306	110	96
	P05783	KRT18	Keratin, type I cytoskeletal 18		K1C18_HUMAN, KRT18, CYK18	Cytoplasm, Perinuclear region, Nucleus, Nucleolus	P05783 K1C18_HUMAN Keratin, type I cytoskeletal 18 P05783,Q53G38,Q5U0N8,Q9BW26 Cell proliferation-inducing gene 46 protein, Cytokeratin-18, Keratin-18 CYK18	adherens junction, cell periphery, centriolar satellite, cytoplasm, cytosol, extracellular exosome, intermediate filament, keratin filament, microtubule organizing center, nucleolus, perinuclear region of cytoplasm	intermediate filament family	http://zinc.docking.org/results/combination?filter.purchasability=purchasable&annotation.name=K1C18_HUMAN	http://cansar.icr.ac.uk/cansar/molecular-targets/P05783/				0	0	0	0	0	0	0	-3	59
	P21810	BGN	Biglycan		PGS1_HUMAN, BGN, SLRR1A	Secreted, Extracellular space, Extracellular matrix	P21810 PGS1_HUMAN Biglycan P21810,D3DWU3,P13247 Bone/cartilage proteoglycan I, PG-S1 SLRR1A	cell surface, collagen-containing extracellular matrix, extracellular exosome, extracellular matrix, extracellular region, extracellular space, golgi lumen, lysosomal lumen, sarcolemma, transport vesicle	small leucine-rich proteoglycan (SLRP) family	http://zinc.docking.org/results/combination?filter.purchasability=purchasable&annotation.name=PGS1_HUMAN	http://cansar.icr.ac.uk/cansar/molecular-targets/P21810/	30.57|Q9NYK1|TLR7|Imiquimod|Whole:::Protein			0	0	0	0	0	0	0	-3	59
	P23396	RPS3	40S ribosomal protein S3	4.2.99.18	RS3_HUMAN, RPS3	Cytoplasm, Nucleus, Nucleus, Nucleolus, Mitochondrion inner membrane, Cytoplasm, Cytoskeleton, Spindle	P23396 RS3_HUMAN 40S ribosomal protein S3 P23396,B2R7N5,J3KN86,Q498B5,Q8NI95 Small ribosomal subunit protein uS3	cytoplasm, cytosol, cytosolic small ribosomal subunit, endoplasmic reticulum, extracellular exosome, focal adhesion, membrane, mitochondrial inner membrane, mitochondrial matrix, mitotic spindle, nf-kappab complex, nucleolus, nucleoplasm, nucleus, plasma membrane, polysome, postsynaptic density, ribonucleoprotein complex, ribosome, ruffle membrane	universal ribosomal protein uS3 family	http://zinc.docking.org/results/combination?filter.purchasability=purchasable&annotation.name=RS3_HUMAN	http://cansar.icr.ac.uk/cansar/molecular-targets/P23396/				16	0	16	2	13	16	100	-3	59
	P10321	HLA-C	HLA class I histocompatibility antigen, C alpha chain		HLAC_HUMAN, HLA-C, HLAC	Cell membrane, Endoplasmic reticulum membrane	P10321 HLAC_HUMAN HLA class I histocompatibility antigen, C alpha chain P10321,O02863,O02864,O02865,O02866,O02958,O19505,O19652,O19676,O62879,O62882,O62883,O62888,O78060,O78061,O78062,O78063,O78067,O78068,O78069,O78072,O78083,O78090,O78091,O78149,O78165,O78166,O78178,O78202,O78203,O78211,O78214,P04222,P30499,P30500,P30501,P30502,P30503,P30504,P30505,P30506,P30507,P30508,P30509,P30510,P79498,Q0700…	cell surface, early endosome membrane, endoplasmic reticulum, er to golgi transport vesicle membrane, extracellular exosome, golgi apparatus, golgi membrane, integral component of lumenal side of endoplasmic reticulum membrane, integral component of plasma membrane, membrane, mhc class i protein complex, phagocytic vesicle membrane, plasma membrane, recycling endosome membrane, secretory granule …		http://zinc.docking.org/results/combination?filter.purchasability=purchasable&annotation.name=HLAC_HUMAN	http://cansar.icr.ac.uk/cansar/molecular-targets/P10321/				11	0	10	5	50	10	100	-0.15	78
	O95467	GNAS	Neuroendocrine secretory protein 55		GNAS3_HUMAN, GNAS, GNAS1	Cytoplasmic vesicle, Secretory vesicle, Secreted	O95467 GNAS3_HUMAN Neuroendocrine secretory protein 55 O95467,B2RB88,E1P5G2,O95417 GNAS1	cytoplasm, extracellular region, nucleus, perinuclear region of cytoplasm, transport vesicle	NESP55 family	http://zinc.docking.org/results/combination?filter.purchasability=purchasable&annotation.name=GNAS3_HUMAN	http://cansar.icr.ac.uk/cansar/molecular-targets/O95467/				0	0	0	0	0	0	0	-3	59
	Q5JWF2	GNAS	Guanine nucleotide-binding protein G(s) subunit alpha isoforms XLas		GNAS1_HUMAN, GNAS, GNAS1	Cell membrane, Apical cell membrane	Q5JWF2 GNAS1_HUMAN Guanine nucleotide-binding protein G(s) subunit alpha isoforms XLas Q5JWF2,A2A2S3,E1P5G3,O75684,O75685,Q5JW67,Q5JWF1,Q9NY42 Adenylate cyclase-stimulating G alpha protein, Extra large alphas protein GNAS1	apical plasma membrane, cytosol, dendrite, extracellular exosome, heterotrimeric g-protein complex, membrane	G-alpha family	http://zinc.docking.org/results/combination?filter.purchasability=purchasable&annotation.name=GNAS1_HUMAN	http://cansar.icr.ac.uk/cansar/molecular-targets/Q5JWF2/				0	0	0	0	0	0	0	-3	59	1	8	0	0	4	0	0
	P84996	GNAS	Protein ALEX		ALEX_HUMAN, GNAS, GNAS1	Cell membrane, Cell projection, Ruffle	P84996 ALEX_HUMAN Protein ALEX P84996,A2A2S4 Alternative gene product encoded by XL-exon GNAS1	cytosol, membrane, plasma membrane, ruffle	ALEX family	http://zinc.docking.org/results/combination?filter.purchasability=purchasable&annotation.name=ALEX_HUMAN	http://cansar.icr.ac.uk/cansar/molecular-targets/P84996/				0	0	0	0	0	0	0	-3	59
	P63092	GNAS	Guanine nucleotide-binding protein G(s) subunit alpha isoforms short		GNAS2_HUMAN, GNAS, GNAS1, GSP	Cell membrane	P63092 GNAS2_HUMAN Guanine nucleotide-binding protein G(s) subunit alpha isoforms short P63092,A6NI00,E1P5G5,P04895,Q12927,Q14433,Q32P26,Q5JWD2,Q5JWD4,Q5JWD5,Q6NR75,Q6NXS0,Q8TBC0,Q96H70 Adenylate cyclase-stimulating G alpha protein GNAS1, GSP	cytoplasm, cytosol, extracellular exosome, heterotrimeric g-protein complex, intrinsic component of membrane, membrane, plasma membrane, trans-golgi network membrane	G-alpha family	http://zinc.docking.org/results/combination?filter.purchasability=purchasable&annotation.name=GNAS2_HUMAN	http://cansar.icr.ac.uk/cansar/molecular-targets/P63092/				29	4	28	16	58	28	100	-3	59
	Q8IUX7	AEBP1	Adipocyte enhancer-binding protein 1		AEBP1_HUMAN, AEBP1, ACLP	Secreted, Cytoplasm, Nucleus	Q8IUX7 AEBP1_HUMAN Adipocyte enhancer-binding protein 1 Q8IUX7,Q14113,Q59ER7,Q6ZSC7,Q7KZ79 Aortic carboxypeptidase-like protein ACLP	collagen-containing extracellular matrix, cytoplasm, extracellular exosome, extracellular region, extracellular space, nucleus	peptidase M14 family	http://zinc.docking.org/results/combination?filter.purchasability=purchasable&annotation.name=AEBP1_HUMAN	http://cansar.icr.ac.uk/cansar/molecular-targets/Q8IUX7/	32.50|Q16832|DDR2|Regorafenib|Whole:::Protein			0	0	0	0	0	0	0	-3	59
	P63313	TMSB10	Thymosin beta-10		TYB10_HUMAN, TMSB10, PTMB10, THYB10	Cytoplasm, Cytoskeleton	P63313 TYB10_HUMAN Thymosin beta-10 P63313,P13472,Q596K9 PTMB10, THYB10	cytoplasm, cytoskeleton	thymosin beta family	http://zinc.docking.org/results/combination?filter.purchasability=purchasable&annotation.name=TYB10_HUMAN	http://cansar.icr.ac.uk/cansar/molecular-targets/P63313/				0	0	0	0	0	0	0	-3	59
	P04439	HLA-A	HLA class I histocompatibility antigen, A alpha chain		HLAA_HUMAN, HLA-A, HLAA	Cell membrane, Endoplasmic reticulum membrane	P04439 HLAA_HUMAN HLA class I histocompatibility antigen, A alpha chain P04439,B1PKZ3,O02939,O02954,O02955,O02963,O19509,O19546,O19598,O19605,O19606,O19619,O19647,O19673,O19687,O19695,O19756,O19794,O19795,O43906,O43907,O46874,O62921,O62924,O77937,O77938,O77964,O78073,O78171,O98009,O98010,O98011,O98137,P01891,P01892,P05534,P06338,P10313,P10314,P10315,P10316,P13746,P16188,P16189,P16190,P18462,P3044…	cell surface, early endosome membrane, endoplasmic reticulum, endoplasmic reticulum exit site, endoplasmic reticulum membrane, er to golgi transport vesicle membrane, extracellular exosome, golgi apparatus, golgi medial cisterna, golgi membrane, integral component of lumenal side of endoplasmic reticulum membrane, integral component of plasma membrane, membrane, mhc class i peptide loading comple…	MHC class I family	http://zinc.docking.org/results/combination?filter.purchasability=purchasable&annotation.name=HLAA_HUMAN	http://cansar.icr.ac.uk/cansar/molecular-targets/P04439/				353	19	346	101	30	345	100	-0.15	78	1	151	64	0	51	31	0
	P51884	LUM	Lumican		LUM_HUMAN, LUM, LDC, SLRR2D	Secreted, Extracellular space, Extracellular matrix	P51884 LUM_HUMAN Lumican P51884,B2R6R5,Q96QM7 Keratan sulfate proteoglycan lumican LDC, SLRR2D	collagen-containing extracellular matrix, extracellular exosome, extracellular matrix, extracellular region, extracellular space, fibrillar collagen trimer, golgi lumen, lysosomal lumen	small leucine-rich proteoglycan (SLRP) family	http://zinc.docking.org/results/combination?filter.purchasability=purchasable&annotation.name=LUM_HUMAN	http://cansar.icr.ac.uk/cansar/molecular-targets/P51884/				0	0	0	0	0	0	0	-3	59
	P22692	IGFBP4	Insulin-like growth factor-binding protein 4		IBP4_HUMAN, IGFBP4, IBP4	Secreted	P22692 IBP4_HUMAN Insulin-like growth factor-binding protein 4 P22692,A0N9W2,B4E351,Q5U012,Q9UCL6 IBP4	endoplasmic reticulum lumen, extracellular region, extracellular space		http://zinc.docking.org/results/combination?filter.purchasability=purchasable&annotation.name=IBP4_HUMAN	http://cansar.icr.ac.uk/cansar/molecular-targets/P22692/				4	0	4	0	0	2	50	-1.25	66	1	2	2	2	1	1	1
	P36578	RPL4	60S ribosomal protein L4		RL4_HUMAN, RPL4, RPL1		P36578 RL4_HUMAN 60S ribosomal protein L4 P36578,A8K502,P39029,Q4VBR0,Q969Z9 60S ribosomal protein L1, Large ribosomal subunit protein uL4 RPL1	cytoplasm, cytosol, cytosolic large ribosomal subunit, extracellular exosome, focal adhesion, membrane, nucleolus, nucleus, ribonucleoprotein complex, rough endoplasmic reticulum	universal ribosomal protein uL4 family	http://zinc.docking.org/results/combination?filter.purchasability=purchasable&annotation.name=RL4_HUMAN	http://cansar.icr.ac.uk/cansar/molecular-targets/P36578/				1	0	0	0	0	0	0	-3	59
	P0CG48	UBC	Polyubiquitin-C		UBC_HUMAN, UBC	Cytoplasm, Nucleus	P0CG48 UBC_HUMAN Polyubiquitin-C P0CG48,P02248,P02249,P02250,P62988,Q29120,Q6LBL4,Q6LDU5,Q8WYN8,Q91887,Q91888,Q9BWD6,Q9BX98,Q9UEF2,Q9UEG1,Q9UEK8,Q9UPK7	cytoplasm, cytosol, endocytic vesicle membrane, endoplasmic reticulum membrane, endosome membrane, extracellular exosome, extracellular space, host cell, mitochondrial outer membrane, nucleoplasm, nucleus, plasma membrane, vesicle	ubiquitin family	http://zinc.docking.org/results/combination?filter.purchasability=purchasable&annotation.name=UBC_HUMAN	http://cansar.icr.ac.uk/cansar/molecular-targets/P0CG48/				262	18	258	28	11	120	47	0.95	90
	P03372	ESR1	Estrogen receptor		ESR1_HUMAN, ESR1, ESR, NR3A1	Nucleus, Cytoplasm, Cell membrane, Nucleus, Cytoplasm, Cell membrane, Cell membrane, Nucleus, Golgi apparatus, Cell membrane	P03372 ESR1_HUMAN Estrogen receptor P03372,Q13511,Q14276,Q5T5H7,Q6MZQ9,Q9NU51,Q9UDZ7,Q9UIS7 ER-alpha, Estradiol receptor, Nuclear receptor subfamily 3 group A member 1 ESR, NR3A1	cytoplasm, cytosol, golgi apparatus, host cell nucleus, integral component of membrane, membrane, nuclear chromatin, nucleoplasm, nucleus, plasma membrane, protein-containing complex, transcription preinitiation complex, transcriptionally active chromatin	nuclear hormone receptor family	http://zinc.docking.org/results/combination?filter.purchasability=purchasable&annotation.name=ESR1_HUMAN	http://cansar.icr.ac.uk/cansar/molecular-targets/P03372/	100.00|P03372|ESR1|Toremifene Citrate,Toremifene,Tamoxifen Citrate,Tamoxifen,Quinestrol,Polyestradiol Phosphate,Ospemifene,Mestranol,Fulvestrant,Ethinyl Estradiol,Estropipate,Estrone Sulfuric Acid,Estrone,Estradiol Acetate,Estradiol Benzoate,Estradiol Cypionate,Estradiol Valerate,Estradiol,Enclomiphene,Diethylstilbestrol Diphosphate,Diethylstilbestrol,Dienestrol,Danazol|Whole:::Protein	100.00|P03372|ESR1|Toremifene Citrate,Toremifene,Tamoxifen Citrate,Tamoxifen,Quinestrol,Polyestradiol Phosphate,Ospemifene,Mestranol,Fulvestrant,Ethinyl Estradiol,Estropipate,Estrone Sulfuric Acid,Estrone,Estradiol Acetate,Estradiol Benzoate,Estradiol Cypionate,Estradiol Valerate,Estradiol,Enclomiphene,Diethylstilbestrol Diphosphate,Diethylstilbestrol,Dienestrol,Danazol|Whole:::Protein||58.99|Q92…	100.00|P03372|ESR1|Toremifene Citrate,Toremifene,Tamoxifen Citrate,Tamoxifen,Quinestrol,Polyestradiol Phosphate,Ospemifene,Mestranol,Fulvestrant,Ethinyl Estradiol,Estropipate,Estrone Sulfuric Acid,Estrone,Estradiol Acetate,Estradiol Benzoate,Estradiol Cypionate,Estradiol Valerate,Estradiol,Enclomiphene,Diethylstilbestrol Diphosphate,Diethylstilbestrol,Dienestrol,Danazol|Whole:::Protein||58.99|Q92…	294	276	278	186	67	276	100	1.45	94	1	6981	1770	702	2119	414	112
	Q9UNF1	MAGED2	Melanoma-associated antigen D2		MAGD2_HUMAN, MAGED2, BCG1		Q9UNF1 MAGD2_HUMAN Melanoma-associated antigen D2 Q9UNF1,A6NMX0,O76058,Q5BJF3,Q8NAL6,Q9H218,Q9P0U9,Q9UM52 11B6, Breast cancer-associated gene 1 protein, Hepatocellular carcinoma-associated protein JCL-1, MAGE-D2 antigen BCG1	cytosol, extracellular region, membrane, nucleolus, nucleoplasm, platelet alpha granule lumen		http://zinc.docking.org/results/combination?filter.purchasability=purchasable&annotation.name=MAGD2_HUMAN	http://cansar.icr.ac.uk/cansar/molecular-targets/Q9UNF1/				0	0	0	0	0	0	0	-3	59
	Q15392	DHCR24	Delta(24)-sterol reductase	1.3.1.72	DHC24_HUMAN, DHCR24, KIAA0018	Endoplasmic reticulum membrane, Golgi apparatus membrane	Q15392 DHC24_HUMAN Delta(24)-sterol reductase Q15392,B7Z817,D3DQ51,Q9HBA8 24-dehydrocholesterol reductase, 3-beta-hydroxysterol Delta-24-reductase, Diminuto/dwarf1 homolog, Seladin-1 KIAA0018	cytoplasm, cytoskeleton, cytosol, endoplasmic reticulum, endoplasmic reticulum membrane, golgi membrane, integral component of membrane, membrane, nucleus	FAD-binding oxidoreductase/transferase type 4 family	http://zinc.docking.org/results/combination?filter.purchasability=purchasable&annotation.name=DHC24_HUMAN	http://cansar.icr.ac.uk/cansar/molecular-targets/Q15392/				0	0	0	0	0	0	0	-3	59	1	274	8	2	232	3	2
	P23771	GATA3	Trans-acting T-cell-specific transcription factor GATA-3		GATA3_HUMAN, GATA3	Nucleus	P23771 GATA3_HUMAN Trans-acting T-cell-specific transcription factor GATA-3 P23771,Q5VWG7,Q5VWG8,Q96J16 GATA-binding factor 3	nuclear chromatin, nucleoplasm, nucleus		http://zinc.docking.org/results/combination?filter.purchasability=purchasable&annotation.name=GATA3_HUMAN	http://cansar.icr.ac.uk/cansar/molecular-targets/P23771/				5	0	5	1	20	4	80	-3	59
	P12109	COL6A1	Collagen alpha-1(VI) chain		CO6A1_HUMAN, COL6A1	Secreted, Extracellular space, Extracellular matrix	P12109 CO6A1_HUMAN Collagen alpha-1(VI) chain P12109,O00117,O00118,Q14040,Q14041,Q16258,Q7Z645,Q9BSA8	collagen type vi trimer, collagen-containing extracellular matrix, endoplasmic reticulum lumen, extracellular exosome, extracellular region, extracellular space, lysosomal membrane, membrane, protein-containing complex, sarcolemma	type VI collagen family	http://zinc.docking.org/results/combination?filter.purchasability=purchasable&annotation.name=CO6A1_HUMAN	http://cansar.icr.ac.uk/cansar/molecular-targets/P12109/				0	0	0	0	0	0	0	-1.55	63
	P05388	RPLP0	60S acidic ribosomal protein P0		RLA0_HUMAN, RPLP0	Nucleus, Cytoplasm	P05388 RLA0_HUMAN 60S acidic ribosomal protein P0 P05388,Q3B7A4,Q9BVK4 60S ribosomal protein L10E, Large ribosomal subunit protein uL10	cytoplasm, cytoplasmic ribonucleoprotein granule, cytosol, cytosolic large ribosomal subunit, endoplasmic reticulum, extracellular exosome, focal adhesion, membrane, nucleus, postsynapse, postsynaptic density, ribonucleoprotein complex	universal ribosomal protein uL10 family	http://zinc.docking.org/results/combination?filter.purchasability=purchasable&annotation.name=RLA0_HUMAN	http://cansar.icr.ac.uk/cansar/molecular-targets/P05388/				0	0	0	0	0	0	0	-3	59
	P15924	DSP	Desmoplakin		DESP_HUMAN, DSP	Cell junction, Desmosome, Cytoplasm, Cytoskeleton, Cell membrane	P15924 DESP_HUMAN Desmoplakin P15924,B2RTT2,D7RX09,O75993,Q14189,Q9UHN4 250/210 kDa paraneoplastic pemphigus antigen	basolateral plasma membrane, cell junction, cornified envelope, cytoplasm, desmosome, extracellular exosome, fascia adherens, ficolin-1-rich granule membrane, intercalated disc, intermediate filament, membrane, nucleus, plasma membrane	plakin or cytolinker family	http://zinc.docking.org/results/combination?filter.purchasability=purchasable&annotation.name=DESP_HUMAN	http://cansar.icr.ac.uk/cansar/molecular-targets/P15924/				4	1	4	2	50	4	100	0.05	80
	P07237	P4HB	Protein disulfide-isomerase	5.3.4.1	PDIA1_HUMAN, P4HB, ERBA2L, PDI, PDIA1, PO4DB	Endoplasmic reticulum, Endoplasmic reticulum lumen, Melanosome, Cell membrane	P07237 PDIA1_HUMAN Protein disulfide-isomerase P07237,B2RDQ2,P30037,P32079,Q15205,Q6LDE5 Cellular thyroid hormone-binding protein, Prolyl 4-hydroxylase subunit beta, p55 ERBA2L, PDI, PDIA1, PO4DB	cytoskeleton, cytosol, endoplasmic reticulum, endoplasmic reticulum chaperone complex, endoplasmic reticulum lumen, endoplasmic reticulum-golgi intermediate compartment, external side of plasma membrane, extracellular exosome, extracellular region, focal adhesion, lamellipodium, melanosome, procollagen-proline 4-dioxygenase complex, protein-containing complex	protein disulfide isomerase family	http://zinc.docking.org/results/combination?filter.purchasability=purchasable&annotation.name=PDIA1_HUMAN	http://cansar.icr.ac.uk/cansar/molecular-targets/P07237/				11	2	11	4	37	10	91	-3	59	1	59	0	0	29	0	0
	P01903	HLA-DRA	HLA class II histocompatibility antigen, DR alpha chain		DRA_HUMAN, HLA-DRA, HLA-DRA1	Cell membrane, Endoplasmic reticulum membrane, Golgi apparatus, Trans-Golgi network membrane, Endosome membrane, Lysosome membrane, Late endosome membrane	P01903 DRA_HUMAN HLA class II histocompatibility antigen, DR alpha chain P01903,A2BET4,Q30160,Q6IAZ1,Q861I2,Q9TP70 MHC class II antigen DRA HLA-DRA1	cell surface, clathrin-coated endocytic vesicle membrane, endocytic vesicle membrane, er to golgi transport vesicle membrane, extracellular exosome, golgi membrane, integral component of lumenal side of endoplasmic reticulum membrane, integral component of plasma membrane, late endosome membrane, lysosomal membrane, lysosome, mhc class ii protein complex, plasma membrane, trans-golgi network memb…	MHC class II family	http://zinc.docking.org/results/combination?filter.purchasability=purchasable&annotation.name=DRA_HUMAN	http://cansar.icr.ac.uk/cansar/molecular-targets/P01903/				102	42	102	6	6	102	100	-0.35	75
	P62280	RPS11	40S ribosomal protein S11		RS11_HUMAN, RPS11		P62280 RS11_HUMAN 40S ribosomal protein S11 P62280,B2R4F5,P04643,Q498Y6,Q6IRY0 Small ribosomal subunit protein uS17	cytoplasm, cytosol, cytosolic small ribosomal subunit, extracellular exosome, focal adhesion, membrane, nucleolus, nucleoplasm, ribosome	universal ribosomal protein uS17 family	http://zinc.docking.org/results/combination?filter.purchasability=purchasable&annotation.name=RS11_HUMAN	http://cansar.icr.ac.uk/cansar/molecular-targets/P62280/				26	0	26	11	43	26	100	-3	59
	O43570	CA12	Carbonic anhydrase 12	4.2.1.1	CAH12_HUMAN, CA12	Membrane, Cell membrane	O43570 CAH12_HUMAN Carbonic anhydrase 12 O43570,B2RE24,Q53YE5,Q9BWG2 Carbonate dehydratase XII, Carbonic anhydrase XII, Tumor antigen HOM-RCC-3.1.3	integral component of membrane, plasma membrane	alpha-carbonic anhydrase family	http://zinc.docking.org/results/combination?filter.purchasability=purchasable&annotation.name=CAH12_HUMAN	http://cansar.icr.ac.uk/cansar/molecular-targets/O43570/	36.12|P00915|CA1|Methocarbamol|Whole:::Protein		36.12|P00915|CA1|Methocarbamol|Whole:::Protein||35.61|P00918|CA2|Omeprazole Magnesium,Omeprazole,Methazolamide,Ethoxzolamide,Dorzolamide Hydrochloride,Dorzolamide,Dichlorphenamide,BZ1,Acetazolamide Sodium,Acetazolamide|Whole:::Protein	24	22	24	20	84	24	100	1.35	93	1	3341	1763	1375	933	581	445
	P55061	TMBIM6	Bax inhibitor 1		BI1_HUMAN, TMBIM6, BI1, TEGT	Endoplasmic reticulum membrane	P55061 BI1_HUMAN Bax inhibitor 1 P55061,B2R5M4,F8W034,O14938,Q643A7,Q96J50 Testis-enhanced gene transcript protein, Transmembrane BAX inhibitor motif-containing protein 6 BI1, TEGT	cytoplasm, endoplasmic reticulum, endoplasmic reticulum membrane, integral component of membrane, integral component of plasma membrane, membrane, mitochondrial membrane, nucleus	BI1 family	http://zinc.docking.org/results/combination?filter.purchasability=purchasable&annotation.name=BI1_HUMAN	http://cansar.icr.ac.uk/cansar/molecular-targets/P55061/				0	0	0	0	0	0	0	-3	59
	P01023	A2M	Alpha-2-macroglobulin		A2MG_HUMAN, A2M, CPAMD5	Secreted	P01023 A2MG_HUMAN Alpha-2-macroglobulin P01023,Q13677,Q59F47,Q5QTS0,Q68DN2,Q6PIY3,Q6PN97 C3 and PZP-like alpha-2-macroglobulin domain-containing protein 5 CPAMD5	blood microparticle, collagen-containing extracellular matrix, cytosol, extracellular exosome, extracellular region, extracellular space, platelet alpha granule lumen	protease inhibitor I39 (alpha-2-macroglobulin) family	http://zinc.docking.org/results/combination?filter.purchasability=purchasable&annotation.name=A2MG_HUMAN	http://cansar.icr.ac.uk/cansar/molecular-targets/P01023/				3	1	3	2	67	2	67	-3	59	1	1	0	0	1	0	0
	P07437	TUBB	Tubulin beta chain		TBB5_HUMAN, TUBB, TUBB5	Cytoplasm, Cytoskeleton	P07437 TBB5_HUMAN Tubulin beta chain P07437,P05218,Q8WUC1,Q9CY33 Tubulin beta-5 chain TUBB5	azurophil granule lumen, cell body, cytoplasm, cytoplasmic ribonucleoprotein granule, cytoskeleton, extracellular exosome, extracellular region, membrane raft, microtubule, nuclear envelope lumen, nucleus, protein-containing complex	tubulin family	http://zinc.docking.org/results/combination?filter.purchasability=purchasable&annotation.name=TBB5_HUMAN	http://cansar.icr.ac.uk/cansar/molecular-targets/P07437/	100.00|P07437|TUBB|Vinflunine,Vindesine Sulfate,Vindesine,Docetaxel,Docetaxel,Cabazitaxel|Whole:::Protein	100.00|P07437|TUBB|Vinflunine,Vindesine Sulfate,Vindesine,Docetaxel,Docetaxel,Cabazitaxel|Whole:::Protein||98.36|P68371|TUBB4B|Paclitaxel,Docetaxel,Docetaxel,Colchicine|Whole:::Protein||97.42|P04350|TUBB4A|Docetaxel,Docetaxel|Whole:::Protein||96.96|Q13885|TUBB2A|Docetaxel,Docetaxel|Whole:::Protein||93.91|Q13509|TUBB3|Docetaxel,Docetaxel|Whole:::Protein||93.90|P12456|mec-7|Mebendazole|Whole:::Prot…	100.00|P07437|TUBB|Vinflunine,Vindesine Sulfate,Vindesine,Docetaxel,Docetaxel,Cabazitaxel|Whole:::Protein||98.36|P68371|TUBB4B|Paclitaxel,Docetaxel,Docetaxel,Colchicine|Whole:::Protein||97.42|P04350|TUBB4A|Docetaxel,Docetaxel|Whole:::Protein||96.96|Q13885|TUBB2A|Docetaxel,Docetaxel|Whole:::Protein||93.91|Q13509|TUBB3|Docetaxel,Docetaxel|Whole:::Protein||93.90|P12456|mec-7|Mebendazole|Whole:::Prot…	8	6	6	6	100	6	100	0.7	87	1	1777	16	12	710	14	10
	P15941	MUC1	Mucin-1		MUC1_HUMAN, MUC1, PUM	Apical cell membrane, Secreted, Secreted, Secreted, Cell membrane, Cytoplasm, Nucleus	P15941 MUC1_HUMAN Mucin-1 P15941,A5YRV1,A6ZID9,A6ZIE0,B1AVQ8,B1AVR0,B6ECA1,E7ESE5,E7EUG9,P13931,P15942,P17626,Q0VAP5,Q0VAP6,Q14128,Q14876,Q16437,Q16442,Q16615,Q6S4Y3,Q7Z547,Q7Z548,Q7Z550,Q7Z552,Q9BXA4,Q9UE75,Q9UE76,Q9UQL1,Q9Y4J2 Breast carcinoma-associated antigen DF3, Cancer antigen 15-3, Carcinoma-associated mucin, Episialin, H23AG, Krebs von den Lungen-6, PEMT, Peanut-reactive urinary mucin, P…	apical plasma membrane, extracellular exosome, extracellular space, golgi lumen, integral component of plasma membrane, nuclear chromatin, plasma membrane, vesicle		http://zinc.docking.org/results/combination?filter.purchasability=purchasable&annotation.name=MUC1_HUMAN	http://cansar.icr.ac.uk/cansar/molecular-targets/P15941/				10	4	2	2	100	2	100	-3	59
	P62241	RPS8	40S ribosomal protein S8		RS8_HUMAN, RPS8	Cytoplasm, Membrane	P62241 RS8_HUMAN 40S ribosomal protein S8 P62241,P09058,Q6IRL7 Small ribosomal subunit protein eS8	cytosol, cytosolic small ribosomal subunit, endoplasmic reticulum, extracellular exosome, focal adhesion, membrane, nucleoplasm, nucleus, ribonucleoprotein complex	eukaryotic ribosomal protein eS8 family	http://zinc.docking.org/results/combination?filter.purchasability=purchasable&annotation.name=RS8_HUMAN	http://cansar.icr.ac.uk/cansar/molecular-targets/P62241/				20	0	20	5	25	20	100	-0.15	78
	Q96HF1	SFRP2	Secreted frizzled-related protein 2		SFRP2_HUMAN, SFRP2, FRP2, SARP1	Secreted	Q96HF1 SFRP2_HUMAN Secreted frizzled-related protein 2 Q96HF1,B3KQR2,O14778,Q9HAP5 Secreted apoptosis-related protein 1 FRP2, SARP1	collagen-containing extracellular matrix, extracellular space	secreted frizzled-related protein (sFRP) family	http://zinc.docking.org/results/combination?filter.purchasability=purchasable&annotation.name=SFRP2_HUMAN	http://cansar.icr.ac.uk/cansar/molecular-targets/Q96HF1/				0	0	0	0	0	0	0	-1.85	60
	P0DMV8	HSPA1A	Heat shock 70 kDa protein 1A		HS71A_HUMAN, HSPA1A, HSP72, HSPA1, HSX70	Cytoplasm, Nucleus, Cytoplasm, Cytoskeleton, Microtubule organizing center, Centrosome	P0DMV8 HS71A_HUMAN Heat shock 70 kDa protein 1A P0DMV8,B4E3B6,P08107,P19790,Q5JQI4,Q5SP17,Q9UQL9,Q9UQM0 Heat shock 70 kDa protein 1 HSP72, HSPA1, HSX70	aggresome, blood microparticle, centriole, centrosome, cytoplasm, cytosol, endoplasmic reticulum, extracellular exosome, extracellular region, ficolin-1-rich granule lumen, focal adhesion, inclusion body, mitochondrion, nuclear speck, nucleoplasm, nucleus, perinuclear region of cytoplasm, plasma membrane, protein-containing complex, ribonucleoprotein complex, vesicle	heat shock protein 70 family	http://zinc.docking.org/results/combination?filter.purchasability=purchasable&annotation.name=HS71A_HUMAN	http://cansar.icr.ac.uk/cansar/molecular-targets/P0DMV8/				40	28	39	31	80	38	98			1	40	1	0	26	1	0
	P07858	CTSB	Cathepsin B	3.4.22.1	CATB_HUMAN, CTSB, CPSB	Lysosome, Melanosome, Secreted, Extracellular space, Apical cell membrane	P07858 CATB_HUMAN Cathepsin B P07858,B3KQR5,B3KRR5,Q503A6,Q96D87 APP secretase, Cathepsin B1 CPSB	apical plasma membrane, collagen-containing extracellular matrix, endolysosome lumen, external side of plasma membrane, extracellular exosome, extracellular region, extracellular space, ficolin-1-rich granule lumen, intracellular, intracellular membrane-bounded organelle, lysosome, melanosome, nucleolus, perinuclear region of cytoplasm	peptidase C1 family	http://zinc.docking.org/results/combination?filter.purchasability=purchasable&annotation.name=CATB_HUMAN	http://cansar.icr.ac.uk/cansar/molecular-targets/P07858/				14	7	14	6	43	14	100	1.15	92	1	2773	157	78	1232	90	42
	P29373	CRABP2	Cellular retinoic acid-binding protein 2		RABP2_HUMAN, CRABP2	Cytoplasm, Endoplasmic reticulum, Nucleus	P29373 RABP2_HUMAN Cellular retinoic acid-binding protein 2 P29373,B2R4Z8,D3DVC5,F1T098,Q6ICN6 Cellular retinoic acid-binding protein II	cytoplasm, cytosol, endoplasmic reticulum, extracellular exosome, nucleoplasm, nucleus	Fatty-acid binding protein (FABP) family	http://zinc.docking.org/results/combination?filter.purchasability=purchasable&annotation.name=RABP2_HUMAN	http://cansar.icr.ac.uk/cansar/molecular-targets/P29373/				72	58	63	61	97	63	100	-0.8	71	1	4	0	0	3	0	0
	P01024	C3	Complement C3		CO3_HUMAN, C3, CPAMD1	Secreted	P01024 CO3_HUMAN Complement C3 P01024,A7E236 C3 and PZP-like alpha-2-macroglobulin domain-containing protein 1 CPAMD1	azurophil granule lumen, blood microparticle, cell surface, endoplasmic reticulum lumen, extracellular exosome, extracellular region, extracellular space, plasma membrane, protein-containing complex, secretory granule lumen		http://zinc.docking.org/results/combination?filter.purchasability=purchasable&annotation.name=CO3_HUMAN	http://cansar.icr.ac.uk/cansar/molecular-targets/P01024/				48	14	47	38	81	45	96	0.25	82	1	69	5	0	23	3	0
	P27797	CALR	Calreticulin		CALR_HUMAN, CALR, CRTC	Endoplasmic reticulum lumen, Cytoplasm, Cytosol, Secreted, Extracellular space, Extracellular matrix, Cell surface, Sarcoplasmic reticulum lumen	P27797 CALR_HUMAN Calreticulin P27797,Q6IAT4,Q9UDG2 CRP55, Calregulin, Endoplasmic reticulum resident protein 60, HACBP, grp60 CRTC	acrosomal vesicle, cell surface, collagen-containing extracellular matrix, cytoplasm, cytosol, endocytic vesicle lumen, endoplasmic reticulum, endoplasmic reticulum lumen, endoplasmic reticulum membrane, endoplasmic reticulum quality control compartment, endoplasmic reticulum-golgi intermediate compartment membrane, external side of plasma membrane, extracellular exosome, extracellular region, ex…	calreticulin family	http://zinc.docking.org/results/combination?filter.purchasability=purchasable&annotation.name=CALR_HUMAN	http://cansar.icr.ac.uk/cansar/molecular-targets/P27797/				7	0	4	1	25	4	100	-3	59
	P05997	COL5A2	Collagen alpha-2(V) chain		CO5A2_HUMAN, COL5A2	Secreted, Extracellular space, Extracellular matrix	P05997 CO5A2_HUMAN Collagen alpha-2(V) chain P05997,P78440,Q13908,Q53WR4,Q59GR4,Q6LDJ5,Q7KZ55,Q86XF6,Q96QB0,Q96QB3	collagen type v trimer, collagen-containing extracellular matrix, endoplasmic reticulum lumen, extracellular matrix, extracellular region, extracellular space	fibrillar collagen family	http://zinc.docking.org/results/combination?filter.purchasability=purchasable&annotation.name=CO5A2_HUMAN	http://cansar.icr.ac.uk/cansar/molecular-targets/P05997/				0	0	0	0	0	0	0	-3	59
	O95994	AGR2	Anterior gradient protein 2 homolog		AGR2_HUMAN, AGR2, AG2	Secreted, Endoplasmic reticulum	O95994 AGR2_HUMAN Anterior gradient protein 2 homolog O95994 HPC8, Secreted cement gland protein XAG-2 homolog AG2	endoplasmic reticulum, extracellular space	AGR family	http://zinc.docking.org/results/combination?filter.purchasability=purchasable&annotation.name=AGR2_HUMAN	http://cansar.icr.ac.uk/cansar/molecular-targets/O95994/				2	0	2	1	50	2	100	-3	59
	Q99715	COL12A1	Collagen alpha-1(XII) chain		COCA1_HUMAN, COL12A1, COL12A1L	Secreted, Extracellular space, Extracellular matrix	Q99715 COCA1_HUMAN Collagen alpha-1(XII) chain Q99715,O43853,Q15955,Q5VYK1,Q5VYK2,Q71UR3,Q99716 COL12A1L	collagen type xii trimer, collagen-containing extracellular matrix, endoplasmic reticulum lumen, extracellular exosome, extracellular region, extracellular space, extracellular vesicle	fibril-associated collagens with interrupted helices (FACIT) family	http://zinc.docking.org/results/combination?filter.purchasability=purchasable&annotation.name=COCA1_HUMAN	http://cansar.icr.ac.uk/cansar/molecular-targets/Q99715/	29.90|P20701|ITGAL|Lifitegrast,Efalizumab|Whole:::Protein			0	0	0	0	0	0	0	0	80
	P26641	EEF1G	Elongation factor 1-gamma		EF1G_HUMAN, EEF1G, EF1G		P26641 EF1G_HUMAN Elongation factor 1-gamma P26641,B4DTG2,Q6PJ62,Q6PK31,Q96CU2,Q9P196 eEF-1B gamma EF1G	cytoplasm, cytosol, extracellular exosome, membrane, nucleus		http://zinc.docking.org/results/combination?filter.purchasability=purchasable&annotation.name=EF1G_HUMAN	http://cansar.icr.ac.uk/cansar/molecular-targets/P26641/				3	0	3	1	34	1	34	-1.6	63	1	1	0	0	1	0	0
	P84098	RPL19	60S ribosomal protein L19		RL19_HUMAN, RPL19		P84098 RL19_HUMAN 60S ribosomal protein L19 P84098,B2R4K2,P14118,P22908,Q502Y6,Q7Z6E4 Large ribosomal subunit protein eL19	cytosol, cytosolic large ribosomal subunit, focal adhesion, membrane, nucleolus, polysomal ribosome, synapse	eukaryotic ribosomal protein eL19 family	http://zinc.docking.org/results/combination?filter.purchasability=purchasable&annotation.name=RL19_HUMAN	http://cansar.icr.ac.uk/cansar/molecular-targets/P84098/				1	0	0	0	0	0	0	-3	59
	P62847	RPS24	40S ribosomal protein S24		RS24_HUMAN, RPS24		P62847 RS24_HUMAN 40S ribosomal protein S24 P62847,E7EPK6,P16632,Q5T0P7,Q5T0P8,Q7Z3D1 Small ribosomal subunit protein eS24	cytosol, cytosolic small ribosomal subunit, membrane, nucleoplasm, nucleus, small ribosomal subunit	eukaryotic ribosomal protein eS24 family	http://zinc.docking.org/results/combination?filter.purchasability=purchasable&annotation.name=RS24_HUMAN	http://cansar.icr.ac.uk/cansar/molecular-targets/P62847/				20	0	20	4	20	4	20	-3	59
	P06733	ENO1	Alpha-enolase	4.2.1.11	ENOA_HUMAN, ENO1, ENO1L1, MBPB1, MPB1	Cytoplasm, Cell membrane, Cytoplasm, Myofibril, Sarcomere, M line, Nucleus	P06733 ENOA_HUMAN Alpha-enolase P06733,B2RD59,P22712,Q16704,Q4TUS4,Q53FT9,Q53HR3,Q658M5,Q6GMP2,Q71V37,Q7Z3V6,Q8WU71,Q96GV1,Q9BT62,Q9UCH6,Q9UM55 2-phospho-D-glycerate hydro-lyase, C-myc promoter-binding protein, Enolase 1, MBP-1, MPB-1, Non-neural enolase, Phosphopyruvate hydratase, Plasminogen-binding protein ENO1L1, MBPB1, MPB1	cell cortex region, cell surface, cytoplasm, cytosol, extracellular exosome, extracellular space, m band, membrane, nucleus, phosphopyruvate hydratase complex, plasma membrane	enolase family	http://zinc.docking.org/results/combination?filter.purchasability=purchasable&annotation.name=ENOA_HUMAN	http://cansar.icr.ac.uk/cansar/molecular-targets/P06733/				7	3	2	0	0	2	100	-3	59	1	5	1	1	5	1	1
	P00751	CFB	Complement factor B	3.4.21.47	CFAB_HUMAN, CFB, BF, BFD	Secreted	P00751 CFAB_HUMAN Complement factor B P00751,B0QZQ6,O15006,Q29944,Q53F89,Q5JP67,Q5ST50,Q96HX6,Q9BTF5,Q9BX92 C3/C5 convertase, Glycine-rich beta glycoprotein, PBF2, Properdin factor B BF, BFD	blood microparticle, extracellular exosome, extracellular region, extracellular space, plasma membrane	peptidase S1 family	http://zinc.docking.org/results/combination?filter.purchasability=purchasable&annotation.name=CFAB_HUMAN	http://cansar.icr.ac.uk/cansar/molecular-targets/P00751/				13	8	13	12	93	13	100	-1.9	59	1	168	101	100	14	5	4
	P40429	RPL13A	60S ribosomal protein L13a		RL13A_HUMAN, RPL13A	Cytoplasm	P40429 RL13A_HUMAN 60S ribosomal protein L13a P40429,A8K505 23 kDa highly basic protein, Large ribosomal subunit protein uL13	cytoplasm, cytosol, cytosolic large ribosomal subunit, focal adhesion, gait complex, large ribosomal subunit, membrane, nucleolus, nucleus, ribonucleoprotein complex, ribosome	universal ribosomal protein uL13 family	http://zinc.docking.org/results/combination?filter.purchasability=purchasable&annotation.name=RL13A_HUMAN	http://cansar.icr.ac.uk/cansar/molecular-targets/P40429/				0	0	0	0	0	0	0	-3	59
	P26373	RPL13	60S ribosomal protein L13		RL13_HUMAN, RPL13, BBC1	Cytoplasm	P26373 RL13_HUMAN 60S ribosomal protein L13 P26373,B4DLX3,F5H1S2,Q3KQT8,Q567Q8,Q9BPX0 Breast basic conserved protein 1, Large ribosomal subunit protein eL13 BBC1	cytosol, cytosolic large ribosomal subunit, cytosolic ribosome, endoplasmic reticulum, membrane, nucleolus, nucleus	eukaryotic ribosomal protein eL13 family	http://zinc.docking.org/results/combination?filter.purchasability=purchasable&annotation.name=RL13_HUMAN	http://cansar.icr.ac.uk/cansar/molecular-targets/P26373/				0	0	0	0	0	0	0	-3	59
	Q6ZT07	TBC1D9	TBC1 domain family member 9		TBCD9_HUMAN, TBC1D9, KIAA0882, TBC1D9A		Q6ZT07 TBCD9_HUMAN TBC1 domain family member 9 Q6ZT07,A6H8U8,D3DNZ1,O94958 TBC1 domain family member 9A KIAA0882, TBC1D9A			http://zinc.docking.org/results/combination?filter.purchasability=purchasable&annotation.name=TBCD9_HUMAN	http://cansar.icr.ac.uk/cansar/molecular-targets/Q6ZT07/				0	0	0	0	0	0	0	-1.55	63
	P07996	THBS1	Thrombospondin-1		TSP1_HUMAN, THBS1, TSP, TSP1	Secreted, Cell surface, Secreted, Extracellular space, Extracellular matrix, Endoplasmic reticulum, Sarcoplasmic reticulum	P07996 TSP1_HUMAN Thrombospondin-1 P07996,A8K6H4,B4E3J7,B9EGH6,Q15667,Q59E99 Glycoprotein G TSP, TSP1	cell surface, collagen-containing extracellular matrix, endoplasmic reticulum, endoplasmic reticulum lumen, external side of plasma membrane, extracellular exosome, extracellular matrix, extracellular region, extracellular space, fibrinogen complex, platelet alpha granule, platelet alpha granule lumen, sarcoplasmic reticulum, secretory granule	thrombospondin family	http://zinc.docking.org/results/combination?filter.purchasability=purchasable&annotation.name=TSP1_HUMAN	http://cansar.icr.ac.uk/cansar/molecular-targets/P07996/				10	3	10	5	50	8	80	0.7	87
	Q08380	LGALS3BP	Galectin-3-binding protein		LG3BP_HUMAN, LGALS3BP, M2BP	Secreted, Secreted, Extracellular space, Extracellular matrix	Q08380 LG3BP_HUMAN Galectin-3-binding protein Q08380,Q7M4S0,Q9UCH8,Q9UCH9,Q9UCI0 Basement membrane autoantigen p105, Lectin galactoside-binding soluble 3-binding protein, Mac-2-binding protein, Tumor-associated antigen 90K M2BP	blood microparticle, collagen-containing extracellular matrix, extracellular exosome, extracellular region, extracellular space, membrane, platelet dense granule lumen		http://zinc.docking.org/results/combination?filter.purchasability=purchasable&annotation.name=LG3BP_HUMAN	http://cansar.icr.ac.uk/cansar/molecular-targets/Q08380/				2	1	2	0	0	1	50	-3	59
	Q9H3M7	TXNIP	Thioredoxin-interacting protein		TXNIP_HUMAN, TXNIP, VDUP1	Cytoplasm	Q9H3M7 TXNIP_HUMAN Thioredoxin-interacting protein Q9H3M7,B4E3D3,Q16226,Q6PML0,Q9BXG9 Thioredoxin-binding protein 2, Vitamin D3 up-regulated protein 1 VDUP1	cytoplasm, cytosol, mitochondrial intermembrane space, nucleus	arrestin family	http://zinc.docking.org/results/combination?filter.purchasability=purchasable&annotation.name=TXNIP_HUMAN	http://cansar.icr.ac.uk/cansar/molecular-targets/Q9H3M7/				11	0	5	4	80	4	80	-3	59
	P08253	MMP2	72 kDa type IV collagenase	3.4.24.24	MMP2_HUMAN, MMP2, CLG4A	Secreted, Extracellular space, Extracellular matrix, Membrane, Nucleus, Cytoplasm, Mitochondrion	P08253 MMP2_HUMAN 72 kDa type IV collagenase P08253,B2R6U1,B4DWH3,E9PE45,Q9UCJ8 72 kDa gelatinase, Gelatinase A, Matrix metalloproteinase-2, TBE-1 CLG4A	collagen-containing extracellular matrix, extracellular region, extracellular space, mitochondrion, nucleus, plasma membrane, sarcomere	peptidase M10A family	http://zinc.docking.org/results/combination?filter.purchasability=purchasable&annotation.name=MMP2_HUMAN	http://cansar.icr.ac.uk/cansar/molecular-targets/P08253/	55.80|P45452|MMP13|Doxycycline Hyclate,Doxycycline,Doxycycline Calcium,Doxycycline|Whole:::Protein	55.80|P45452|MMP13|Doxycycline Hyclate,Doxycycline,Doxycycline Calcium,Doxycycline|Whole:::Protein||52.51|P09237|MMP7|Doxycycline Hyclate,Doxycycline,Doxycycline Calcium,Doxycycline|Whole:::Protein	55.80|P45452|MMP13|Doxycycline Hyclate,Doxycycline,Doxycycline Calcium,Doxycycline|Whole:::Protein||52.51|P09237|MMP7|Doxycycline Hyclate,Doxycycline,Doxycycline Calcium,Doxycycline|Whole:::Protein||47.54|P22894|MMP8|Doxycycline Hyclate,Doxycycline,Doxycycline Calcium,Doxycycline|Whole:::Protein||46.89|P03956|MMP1|Doxycycline Hyclate,Doxycycline,Doxycycline Calcium,Doxycycline|Whole:::Protein||42…	11	1	11	4	37	7	64	1.9	97	1	4958	1499	971	1863	603	358
	P46777	RPL5	60S ribosomal protein L5		RL5_HUMAN, RPL5	Cytoplasm, Nucleus, Nucleolus	P46777 RL5_HUMAN 60S ribosomal protein L5 P46777,Q32LZ3,Q53HH6,Q9H3F4 Large ribosomal subunit protein uL18	cytoplasm, cytosol, cytosolic large ribosomal subunit, endoplasmic reticulum, extracellular exosome, focal adhesion, membrane, nucleolus, nucleoplasm, nucleus, protein-containing complex, ribonucleoprotein complex, synapse	universal ribosomal protein uL18 family	http://zinc.docking.org/results/combination?filter.purchasability=purchasable&annotation.name=RL5_HUMAN	http://cansar.icr.ac.uk/cansar/molecular-targets/P46777/				0	0	0	0	0	0	0	-3	59
	O75369	FLNB	Filamin-B		FLNB_HUMAN, FLNB, FLN1L, FLN3, TABP, TAP	Cytoplasm, Cell cortex, Cytoplasm, Cytoskeleton, Cytoplasm, Cytoskeleton, Stress fiber, Cytoplasm, Myofibril, Sarcomere, Z line, Cytoplasm, Cytoskeleton, Stress fiber, Cytoplasm, Cytoskeleton, Stress fiber, Cytoplasm, Cytoskeleton	O75369 FLNB_HUMAN Filamin-B O75369,B2ZZ83,B2ZZ84,B2ZZ85,C9JKE6,C9JMC4,Q13706,Q59EC2,Q60FE7,Q6MZJ1,Q8WXS9,Q8WXT0,Q8WXT1,Q8WXT2,Q8WXT3,Q9NRB5,Q9NT26,Q9UEV9 ABP-278, ABP-280 homolog, Actin-binding-like protein, Beta-filamin, Filamin homolog 1, Filamin-3, Thyroid autoantigen, Truncated actin-binding protein FLN1L, FLN3, TABP, TAP	actin cytoskeleton, brush border, cell cortex, cytoplasm, cytosol, extracellular exosome, focal adhesion, integral component of membrane, neuron projection, neuronal cell body, nucleus, phagocytic vesicle, plasma membrane, stress fiber, z disc	filamin family	http://zinc.docking.org/results/combination?filter.purchasability=purchasable&annotation.name=FLNB_HUMAN	http://cansar.icr.ac.uk/cansar/molecular-targets/O75369/				23	0	23	2	9	15	66	2.15	97
	P08729	KRT7	Keratin, type II cytoskeletal 7		K2C7_HUMAN, KRT7, SCL	Cytoplasm	P08729 K2C7_HUMAN Keratin, type II cytoskeletal 7 P08729,Q92676,Q9BUD8,Q9Y3R7 Cytokeratin-7, Keratin-7, Sarcolectin, Type-II keratin Kb7 SCL	cytoplasm, cytosol, extracellular exosome, intermediate filament, keratin filament, nucleus	intermediate filament family	http://zinc.docking.org/results/combination?filter.purchasability=purchasable&annotation.name=K2C7_HUMAN	http://cansar.icr.ac.uk/cansar/molecular-targets/P08729/				1	0	0	0	0	0	0	-3	59
	P60866	RPS20	40S ribosomal protein S20		RS20_HUMAN, RPS20	Cytoplasm	P60866 RS20_HUMAN 40S ribosomal protein S20 P60866,B2R4F4,B4DW28,P17075,Q5M8S9 Small ribosomal subunit protein uS10	cytosol, cytosolic small ribosomal subunit, extracellular exosome, membrane, nucleoplasm, small ribosomal subunit, synapse	universal ribosomal protein uS10 family	http://zinc.docking.org/results/combination?filter.purchasability=purchasable&annotation.name=RS20_HUMAN	http://cansar.icr.ac.uk/cansar/molecular-targets/P60866/				23	0	23	2	9	10	44	-3	59
	P68363	TUBA1B	Tubulin alpha-1B chain		TBA1B_HUMAN, TUBA1B	Cytoplasm, Cytoskeleton	P68363 TBA1B_HUMAN Tubulin alpha-1B chain P68363,P04687,P05209,Q27I68,Q8WU19 Alpha-tubulin ubiquitous, Tubulin K-alpha-1, Tubulin alpha-ubiquitous chain	cytoplasm, cytoplasmic microtubule, membrane raft, microtubule, microtubule cytoskeleton	tubulin family	http://zinc.docking.org/results/combination?filter.purchasability=purchasable&annotation.name=TBA1B_HUMAN	http://cansar.icr.ac.uk/cansar/molecular-targets/P68363/	100.00|P68363|TUBA1B|Docetaxel,Docetaxel|Whole:::Protein	100.00|P68363|TUBA1B|Docetaxel,Docetaxel|Whole:::Protein||99.54|Q71U36|TUBA1A|Vinflunine,Vindesine Sulfate,Vindesine,Docetaxel,Docetaxel|Whole:::Protein||99.31|Q9BQE3|TUBA1C|Docetaxel,Docetaxel|Whole:::Protein||97.69|P68366|TUBA4A|Docetaxel,Docetaxel,Colchicine|Whole:::Protein||96.75|Q6PEY2|TUBA3E|Docetaxel,Docetaxel|Whole:::Protein	100.00|P68363|TUBA1B|Docetaxel,Docetaxel|Whole:::Protein||99.54|Q71U36|TUBA1A|Vinflunine,Vindesine Sulfate,Vindesine,Docetaxel,Docetaxel|Whole:::Protein||99.31|Q9BQE3|TUBA1C|Docetaxel,Docetaxel|Whole:::Protein||97.69|P68366|TUBA4A|Docetaxel,Docetaxel,Colchicine|Whole:::Protein||96.75|Q6PEY2|TUBA3E|Docetaxel,Docetaxel|Whole:::Protein||42.59|P12456|mec-7|Mebendazole|Whole:::Protein||42.40|P21148|TB…	74	71	70	41	59	70	100	0.7	87	1	1753	16	12	709	14	10
	P20908	COL5A1	Collagen alpha-1(V) chain		CO5A1_HUMAN, COL5A1	Secreted, Extracellular space, Extracellular matrix	P20908 CO5A1_HUMAN Collagen alpha-1(V) chain P20908,A0A087WXW9,Q15094,Q5SUX4	basement membrane, collagen type v trimer, collagen-containing extracellular matrix, endoplasmic reticulum lumen, extracellular matrix, extracellular region, extracellular space	fibrillar collagen family	http://zinc.docking.org/results/combination?filter.purchasability=purchasable&annotation.name=CO5A1_HUMAN	http://cansar.icr.ac.uk/cansar/molecular-targets/P20908/				0	0	0	0	0	0	0	-3	59
	P37802	TAGLN2	Transgelin-2		TAGL2_HUMAN, TAGLN2, KIAA0120		P37802 TAGL2_HUMAN Transgelin-2 P37802,E9KL39,Q5JRQ6,Q5JRQ7,Q6FGI1,Q9BUH5,Q9H4P0 Epididymis tissue protein Li 7e, SM22-alpha homolog KIAA0120	cytosol, extracellular exosome, extracellular region, vesicle	calponin family	http://zinc.docking.org/results/combination?filter.purchasability=purchasable&annotation.name=TAGL2_HUMAN	http://cansar.icr.ac.uk/cansar/molecular-targets/P37802/				1	0	1	0	0	1	100	-3	59
	P23528	CFL1	Cofilin-1		COF1_HUMAN, CFL1, CFL	Nucleus matrix, Cytoplasm, Cytoskeleton, Cell projection, Ruffle membrane, Cell projection, Lamellipodium membrane, Cell projection, Lamellipodium	P23528 COF1_HUMAN Cofilin-1 P23528,B3KUQ1,Q53Y87,Q9UCA2 18 kDa phosphoprotein, Cofilin, non-muscle isoform CFL	actin cytoskeleton, cell-cell junction, cortical actin cytoskeleton, cytoplasm, cytosol, extracellular exosome, extracellular space, focal adhesion, lamellipodium, lamellipodium membrane, membrane, nuclear matrix, nucleus, ruffle membrane, vesicle	actin-binding proteins ADF family	http://zinc.docking.org/results/combination?filter.purchasability=purchasable&annotation.name=COF1_HUMAN	http://cansar.icr.ac.uk/cansar/molecular-targets/P23528/				10	0	10	1	10	8	80	-3	59	1	11	0	0	9	0	0
	P12830	CDH1	Cadherin-1		CADH1_HUMAN, CDH1, CDHE, UVO	Cell junction, Adherens junction, Cell membrane, Endosome, Golgi apparatus, Trans-Golgi network	P12830 CADH1_HUMAN Cadherin-1 P12830,A8K1U7,Q13799,Q14216,Q15855,Q16194,Q4PJ14,Q9UII8 CAM 120/80, Epithelial cadherin, Uvomorulin CDHE, UVO	actin cytoskeleton, adherens junction, apical junction complex, catenin complex, cell junction, cytoplasm, cytoplasmic side of plasma membrane, endosome, extracellular exosome, extracellular region, flotillin complex, glutamatergic synapse, integral component of membrane, lamellipodium, lateral plasma membrane, perinuclear region of cytoplasm, plasma membrane, postsynapse, trans-golgi network		http://zinc.docking.org/results/combination?filter.purchasability=purchasable&annotation.name=CADH1_HUMAN	http://cansar.icr.ac.uk/cansar/molecular-targets/P12830/				16	1	14	1	8	3	22	-3	59	1	11	0	0	11	0	0
	P62910	RPL32	60S ribosomal protein L32		RL32_HUMAN, RPL32		P62910 RL32_HUMAN 60S ribosomal protein L32 P62910,B2R4Q3,P02433 Large ribosomal subunit protein eL32	cytosol, cytosolic large ribosomal subunit, membrane, polysomal ribosome	eukaryotic ribosomal protein eL32 family	http://zinc.docking.org/results/combination?filter.purchasability=purchasable&annotation.name=RL32_HUMAN	http://cansar.icr.ac.uk/cansar/molecular-targets/P62910/				0	0	0	0	0	0	0	-3	59
	P24347	MMP11	Stromelysin-3	3.4.24.-	MMP11_HUMAN, MMP11, STMY3	Secreted, Extracellular space, Extracellular matrix	P24347 MMP11_HUMAN Stromelysin-3 P24347,Q5FX24,Q6PEZ6,Q9UC26 Matrix metalloproteinase-11 STMY3	extracellular matrix, extracellular region, extracellular space, golgi lumen	peptidase M10A family	http://zinc.docking.org/results/combination?filter.purchasability=purchasable&annotation.name=MMP11_HUMAN	http://cansar.icr.ac.uk/cansar/molecular-targets/P24347/	43.41|P09237|MMP7|Doxycycline Hyclate,Doxycycline,Doxycycline Calcium,Doxycycline|Whole:::Protein		43.41|P09237|MMP7|Doxycycline Hyclate,Doxycycline,Doxycycline Calcium,Doxycycline|Whole:::Protein||39.50|P03956|MMP1|Doxycycline Hyclate,Doxycycline,Doxycycline Calcium,Doxycycline|Whole:::Protein||37.22|P22894|MMP8|Doxycycline Hyclate,Doxycycline,Doxycycline Calcium,Doxycycline|Whole:::Protein||37.21|P45452|MMP13|Doxycycline Hyclate,Doxycycline,Doxycycline Calcium,Doxycycline|Whole:::Protein	0	0	0	0	0	0	0	-0.1	78	1	14	3	0	13	3	0
	P27824	CANX	Calnexin		CALX_HUMAN, CANX	Endoplasmic reticulum membrane, Endoplasmic reticulum, Melanosome	P27824 CALX_HUMAN Calnexin P27824,B2R5V8,B4DGP8,B4E2T8,D3DWQ3,D6R9K3 IP90, Major histocompatibility complex class I antigen-binding protein p88, p90	axon, dendrite cytoplasm, dendritic spine, endoplasmic reticulum, endoplasmic reticulum lumen, endoplasmic reticulum membrane, endoplasmic reticulum quality control compartment, extracellular exosome, glutamatergic synapse, integral component of lumenal side of endoplasmic reticulum membrane, integral component of postsynaptic membrane, integral component of presynaptic active zone membrane, mela…	calreticulin family	http://zinc.docking.org/results/combination?filter.purchasability=purchasable&annotation.name=CALX_HUMAN	http://cansar.icr.ac.uk/cansar/molecular-targets/P27824/				0	0	0	0	0	0	0	-3	59	1	1	0	0	1	0	0
	P15880	RPS2	40S ribosomal protein S2		RS2_HUMAN, RPS2, RPS4		P15880 RS2_HUMAN 40S ribosomal protein S2 P15880,B2R5G0,D3DU82,Q3MIB1 40S ribosomal protein S4, Protein LLRep3, Small ribosomal subunit protein uS5 RPS4	cytosol, cytosolic small ribosomal subunit, extracellular exosome, focal adhesion, membrane, nucleoplasm, nucleus	universal ribosomal protein uS5 family	http://zinc.docking.org/results/combination?filter.purchasability=purchasable&annotation.name=RS2_HUMAN	http://cansar.icr.ac.uk/cansar/molecular-targets/P15880/				17	0	17	2	12	17	100	-3	59
	P62888	RPL30	60S ribosomal protein L30		RL30_HUMAN, RPL30		P62888 RL30_HUMAN 60S ribosomal protein L30 P62888,B2R591,P04645,Q502Z6 Large ribosomal subunit protein eL30	cytosol, cytosolic large ribosomal subunit, extracellular exosome, focal adhesion, membrane, nucleus, polysomal ribosome, postsynaptic density	eukaryotic ribosomal protein eL30 family	http://zinc.docking.org/results/combination?filter.purchasability=purchasable&annotation.name=RL30_HUMAN	http://cansar.icr.ac.uk/cansar/molecular-targets/P62888/				1	0	1	0	0	0	0	-3	59
	P62913	RPL11	60S ribosomal protein L11		RL11_HUMAN, RPL11	Nucleus, Nucleolus, Cytoplasm	P62913 RL11_HUMAN 60S ribosomal protein L11 P62913,P25121,P39026,Q8TDH2,Q9Y674 CLL-associated antigen KW-12, Large ribosomal subunit protein uL5	cytoplasm, cytosol, cytosolic large ribosomal subunit, extracellular exosome, membrane, nucleolus, nucleoplasm, polysomal ribosome, protein-containing complex	universal ribosomal protein uL5 family	http://zinc.docking.org/results/combination?filter.purchasability=purchasable&annotation.name=RL11_HUMAN	http://cansar.icr.ac.uk/cansar/molecular-targets/P62913/				1	0	1	0	0	1	100	-0.35	75
	P61313	RPL15	60S ribosomal protein L15		RL15_HUMAN, RPL15, EC45	Membrane	P61313 RL15_HUMAN 60S ribosomal protein L15 P61313,P39030,P41051,Q5U0C0,Q642I1,Q6IPX6,Q8WYP2,Q96C44,Q9H2E5 Large ribosomal subunit protein eL15 EC45	cytosol, cytosolic large ribosomal subunit, membrane, nucleus, ribosome	eukaryotic ribosomal protein eL15 family	http://zinc.docking.org/results/combination?filter.purchasability=purchasable&annotation.name=RL15_HUMAN	http://cansar.icr.ac.uk/cansar/molecular-targets/P61313/				0	0	0	0	0	0	0	-1.25	66
	P39019	RPS19	40S ribosomal protein S19		RS19_HUMAN, RPS19	Nucleus	P39019 RS19_HUMAN 40S ribosomal protein S19 P39019 Small ribosomal subunit protein eS19	cytoplasm, cytosol, cytosolic small ribosomal subunit, extracellular exosome, focal adhesion, membrane, nucleolus, nucleoplasm, postsynaptic density, ribosome	eukaryotic ribosomal protein eS19 family	http://zinc.docking.org/results/combination?filter.purchasability=purchasable&annotation.name=RS19_HUMAN	http://cansar.icr.ac.uk/cansar/molecular-targets/P39019/				18	0	18	4	23	13	73	-3	59
	P06454	PTMA	Prothymosin alpha		PTMA_HUMAN, PTMA, TMSA	Nucleus	P06454 PTMA_HUMAN Prothymosin alpha P06454,Q15249,Q15592 TMSA	cytosol, nucleoplasm, nucleus	pro/parathymosin family	http://zinc.docking.org/results/combination?filter.purchasability=purchasable&annotation.name=PTMA_HUMAN	http://cansar.icr.ac.uk/cansar/molecular-targets/P06454/				2	0	0	0	0	0	0	-3	59
	P13611	VCAN	Versican core protein		CSPG2_HUMAN, VCAN, CSPG2	Secreted, Extracellular space, Extracellular matrix, Cell projection, Cilium, Photoreceptor outer segment, Secreted, Extracellular space, Extracellular matrix, Interphotoreceptor matrix	P13611 CSPG2_HUMAN Versican core protein P13611,P20754,Q13010,Q13189,Q15123,Q9UCL9,Q9UNW5 Chondroitin sulfate proteoglycan core protein 2, Glial hyaluronate-binding protein, Large fibroblast proteoglycan, PG-M CSPG2	collagen-containing extracellular matrix, endoplasmic reticulum lumen, extracellular matrix, extracellular region, extracellular space, golgi lumen, interphotoreceptor matrix, lysosomal lumen, membrane, photoreceptor outer segment	aggrecan/versican proteoglycan family	http://zinc.docking.org/results/combination?filter.purchasability=purchasable&annotation.name=CSPG2_HUMAN	http://cansar.icr.ac.uk/cansar/molecular-targets/P13611/				0	0	0	0	0	0	0	1.35	93
	P25398	RPS12	40S ribosomal protein S12		RS12_HUMAN, RPS12	Cytoplasm	P25398 RS12_HUMAN 40S ribosomal protein S12 P25398,Q76M58 Small ribosomal subunit protein eS12	cytosol, cytosolic small ribosomal subunit, golgi apparatus, intracellular membrane-bounded organelle, membrane, nucleoplasm	eukaryotic ribosomal protein eS12 family	http://zinc.docking.org/results/combination?filter.purchasability=purchasable&annotation.name=RS12_HUMAN	http://cansar.icr.ac.uk/cansar/molecular-targets/P25398/				24	0	24	9	38	18	75	-3	59
	Q01995	TAGLN	Transgelin		TAGL_HUMAN, TAGLN, SM22, WS3-10	Cytoplasm	Q01995 TAGL_HUMAN Transgelin Q01995,O15542 22 kDa actin-binding protein, Protein WS3-10, Smooth muscle protein 22-alpha SM22, WS3-10	cytoplasm	calponin family	http://zinc.docking.org/results/combination?filter.purchasability=purchasable&annotation.name=TAGL_HUMAN	http://cansar.icr.ac.uk/cansar/molecular-targets/Q01995/				0	0	0	0	0	0	0	-3	59
	P62945	RPL41	60S ribosomal protein L41		RL41_HUMAN, RPL41		P62945 RL41_HUMAN 60S ribosomal protein L41 P62945,A6NG21,P28751 HG12, Large ribosomal subunit protein eL41	cytosol, cytosolic large ribosomal subunit, endoplasmic reticulum, polysomal ribosome	eukaryotic ribosomal protein eL41 family	http://zinc.docking.org/results/combination?filter.purchasability=purchasable&annotation.name=RL41_HUMAN	http://cansar.icr.ac.uk/cansar/molecular-targets/P62945/				6	0	0	0	0	0	0	-3	59
	P24385	CCND1	G1/S-specific cyclin-D1		CCND1_HUMAN, CCND1, BCL1, PRAD1	Nucleus, Cytoplasm, Nucleus membrane	P24385 CCND1_HUMAN G1/S-specific cyclin-D1 P24385,Q6LEF0 B-cell lymphoma 1 protein, BCL-1 oncogene, PRAD1 oncogene BCL1, PRAD1	bicellular tight junction, cyclin-dependent protein kinase holoenzyme complex, cytoplasm, cytosol, host cell nucleus, intracellular, nuclear membrane, nucleoplasm, nucleus, transcription repressor complex	cyclin family	http://zinc.docking.org/results/combination?filter.purchasability=purchasable&annotation.name=CCND1_HUMAN	http://cansar.icr.ac.uk/cansar/molecular-targets/P24385/	100.00|P24385|CCND1|Palbociclib|Whole:::Protein	100.00|P24385|CCND1|Palbociclib|Whole:::Protein	100.00|P24385|CCND1|Palbociclib|Whole:::Protein	9	0	8	5	63	8	100	1.85	96	1	1993	515	386	744	208	159
	P07355	ANXA2	Annexin A2		ANXA2_HUMAN, ANXA2, ANX2, ANX2L4, CAL1H, LPC2D	Secreted, Extracellular space, Extracellular matrix, Basement membrane, Melanosome	P07355 ANXA2_HUMAN Annexin A2 P07355,Q567R4,Q6N0B3,Q8TBV2,Q96DD5,Q9UDH8 Annexin II, Annexin-2, Calpactin I heavy chain, Calpactin-1 heavy chain, Chromobindin-8, Lipocortin II, Placental anticoagulant protein IV, Protein I, p36 ANX2, ANX2L4, CAL1H, LPC2D	adherens junction, anxa2-p11 complex, azurophil granule lumen, basement membrane, basolateral plasma membrane, cell cortex, cell surface, collagen-containing extracellular matrix, cytoplasm, cytosol, early endosome, endosome, extracellular exosome, extracellular region, extracellular space, extrinsic component of plasma membrane, late endosome membrane, lipid droplet, lysosomal membrane, macropin…	annexin family	http://zinc.docking.org/results/combination?filter.purchasability=purchasable&annotation.name=ANXA2_HUMAN	http://cansar.icr.ac.uk/cansar/molecular-targets/P07355/				20	0	19	14	74	19	100	-0.85	70	1	94	0	0	28	0	0
	P13987	CD59	CD59 glycoprotein		CD59_HUMAN, CD59, MIC11, MIN1, MIN2, MIN3, MSK21	Cell membrane, Secreted	P13987 CD59_HUMAN CD59 glycoprotein P13987,E9PR17 1F5 antigen, 20 kDa homologous restriction factor, MAC-inhibitory protein, MEM43 antigen, Membrane attack complex inhibition factor, Membrane inhibitor of reactive lysis, Protectin MIC11, MIN1, MIN2, MIN3, MSK21	anchored component of external side of plasma membrane, cell surface, endoplasmic reticulum membrane, endoplasmic reticulum-golgi intermediate compartment membrane, er to golgi transport vesicle membrane, extracellular exosome, extracellular space, focal adhesion, golgi membrane, membrane, plasma membrane, specific granule membrane, tertiary granule membrane, transport vesicle, vesicle		http://zinc.docking.org/results/combination?filter.purchasability=purchasable&annotation.name=CD59_HUMAN	http://cansar.icr.ac.uk/cansar/molecular-targets/P13987/				12	0	11	0	0	5	46	0	80
	Q9UHF7	TRPS1	Zinc finger transcription factor Trps1		TRPS1_HUMAN, TRPS1	Nucleus	Q9UHF7 TRPS1_HUMAN Zinc finger transcription factor Trps1 Q9UHF7,B4E1Z5,Q08AU2,Q9NWE1,Q9UHH6 Tricho-rhino-phalangeal syndrome type I protein, Zinc finger protein GC79	nuclear chromatin, nucleoplasm, nucleus, protein-containing complex		http://zinc.docking.org/results/combination?filter.purchasability=purchasable&annotation.name=TRPS1_HUMAN	http://cansar.icr.ac.uk/cansar/molecular-targets/Q9UHF7/				0	0	0	0	0	0	0	-0.85	70
	P62424	RPL7A	60S ribosomal protein L7a		RL7A_HUMAN, RPL7A, SURF-3, SURF3		P62424 RL7A_HUMAN 60S ribosomal protein L7a P62424,P11518,Q5T8U4 Large ribosomal subunit protein eL8, PLA-X polypeptide, Surfeit locus protein 3 SURF-3, SURF3	cytoplasm, cytosol, cytosolic large ribosomal subunit, focal adhesion, membrane, nucleolus, nucleus, polysomal ribosome, synapse	eukaryotic ribosomal protein eL8 family	http://zinc.docking.org/results/combination?filter.purchasability=purchasable&annotation.name=RL7A_HUMAN	http://cansar.icr.ac.uk/cansar/molecular-targets/P62424/				0	0	0	0	0	0	0	2.3	98
	P46779	RPL28	60S ribosomal protein L28		RL28_HUMAN, RPL28		P46779 RL28_HUMAN 60S ribosomal protein L28 P46779,B2R4A6,B4DEP9,C9JB50,E9PB24,G5E9L2,Q6IAY0,Q96FX1,Q9BWQ0 Large ribosomal subunit protein eL28	cell body, cytoplasmic ribonucleoprotein granule, cytosol, cytosolic large ribosomal subunit, dendrite, extracellular exosome, membrane	eukaryotic ribosomal protein eL28 family	http://zinc.docking.org/results/combination?filter.purchasability=purchasable&annotation.name=RL28_HUMAN	http://cansar.icr.ac.uk/cansar/molecular-targets/P46779/				0	0	0	0	0	0	0	-3	59
	P04792	HSPB1	Heat shock protein beta-1		HSPB1_HUMAN, HSPB1, HSP27, HSP28	Cytoplasm, Nucleus, Cytoplasm, Cytoskeleton, Spindle	P04792 HSPB1_HUMAN Heat shock protein beta-1 P04792,B2R4N8,Q6FI47,Q96C20,Q96EI7,Q9UC31,Q9UC34,Q9UC35,Q9UC36 28 kDa heat shock protein, Estrogen-regulated 24 kDa protein, Heat shock 27 kDa protein, Stress-responsive protein 27 HSP27, HSP28	axon cytoplasm, cytoplasm, cytoskeleton, cytosol, extracellular exosome, extracellular space, focal adhesion, nucleus, plasma membrane, proteasome complex, spindle, z disc	small heat shock protein (HSP20) family	http://zinc.docking.org/results/combination?filter.purchasability=purchasable&annotation.name=HSPB1_HUMAN	http://cansar.icr.ac.uk/cansar/molecular-targets/P04792/				6	0	6	1	17	2	34	-0.75	71	1	48	2	1	29	2	1
	Q07020	RPL18	60S ribosomal protein L18		RL18_HUMAN, RPL18	Cytoplasm, Cytosol, Cytoplasm, Rough endoplasmic reticulum	Q07020 RL18_HUMAN 60S ribosomal protein L18 Q07020,F8VWC5,Q8WTZ6 Large ribosomal subunit protein eL18	cytosol, cytosolic large ribosomal subunit, endoplasmic reticulum, focal adhesion, membrane, nucleolus, nucleus, polysomal ribosome, rough endoplasmic reticulum	eukaryotic ribosomal protein eL18 family	http://zinc.docking.org/results/combination?filter.purchasability=purchasable&annotation.name=RL18_HUMAN	http://cansar.icr.ac.uk/cansar/molecular-targets/Q07020/				0	0	0	0	0	0	0	-3	59
	Q07954	LRP1	Prolow-density lipoprotein receptor-related protein 1		LRP1_HUMAN, LRP1, A2MR, APR	Cell membrane, Membrane, Coated pit, Cell membrane, Membrane, Coated pit, Cytoplasm, Nucleus, Postsynaptic Golgi apparatus, Cytoplasm, Cytoskeleton, Microtubule organizing center	Q07954 LRP1_HUMAN Prolow-density lipoprotein receptor-related protein 1 Q07954,Q2PP12,Q86SW0,Q8IVG8 Alpha-2-macroglobulin receptor, Apolipoprotein E receptor A2MR, APR	apical part of cell, axonal growth cone, basolateral plasma membrane, clathrin-coated pit, clathrin-coated vesicle, cytoskeleton, dendrite, early endosome, endocytic vesicle membrane, focal adhesion, insulin-responsive compartment, integral component of plasma membrane, lysosomal membrane, membrane, neuronal cell body, nucleus, plasma membrane, plasma membrane protein complex, postsynaptic golgi …	LDLR family	http://zinc.docking.org/results/combination?filter.purchasability=purchasable&annotation.name=LRP1_HUMAN	http://cansar.icr.ac.uk/cansar/molecular-targets/Q07954/				7	0	7	0	0	1	15	1.55	95
	Q00610	CLTC	Clathrin heavy chain 1		CLH1_HUMAN, CLTC, CLH17, CLTCL2, KIAA0034	Cytoplasmic vesicle membrane, Membrane, Coated pit, Melanosome, Cytoplasm, Cytoskeleton, Spindle	Q00610 CLH1_HUMAN Clathrin heavy chain 1 Q00610,D3DU00,Q6N0A0,Q86TF2 Clathrin heavy chain on chromosome 17 CLH17, CLTCL2, KIAA0034	clathrin coat, clathrin coat of coated pit, clathrin coat of trans-golgi network vesicle, clathrin complex, clathrin-coated endocytic vesicle, clathrin-coated endocytic vesicle membrane, clathrin-coated vesicle, cytosol, endolysosome membrane, endosome, extracellular exosome, extracellular vesicle, focal adhesion, lysosome, melanosome, membrane, mitotic spindle, mitotic spindle microtubule, plasm…	clathrin heavy chain family	http://zinc.docking.org/results/combination?filter.purchasability=purchasable&annotation.name=CLH1_HUMAN	http://cansar.icr.ac.uk/cansar/molecular-targets/Q00610/				27	3	24	23	96	24	100	0.05	80	1	34	0	0	6	0	0
	P14625	HSP90B1	Endoplasmin		ENPL_HUMAN, HSP90B1, GRP94, TRA1	Endoplasmic reticulum lumen, Sarcoplasmic reticulum lumen, Melanosome	P14625 ENPL_HUMAN Endoplasmin P14625,Q96A97 94 kDa glucose-regulated protein, Heat shock protein 90 kDa beta member 1, Tumor rejection antigen 1, gp96 homolog GRP94, TRA1	collagen-containing extracellular matrix, cytosol, endocytic vesicle lumen, endoplasmic reticulum, endoplasmic reticulum chaperone complex, endoplasmic reticulum lumen, endoplasmic reticulum membrane, extracellular exosome, extracellular region, focal adhesion, melanosome, membrane, midbody, nucleus, perinuclear region of cytoplasm, plasma membrane, protein-containing complex, sarcoplasmic reticu…	heat shock protein 90 family	http://zinc.docking.org/results/combination?filter.purchasability=purchasable&annotation.name=ENPL_HUMAN	http://cansar.icr.ac.uk/cansar/molecular-targets/P14625/				1	1	1	1	100	1	100	-1.05	68	1	267	4	2	89	4	2
	P67936	TPM4	Tropomyosin alpha-4 chain		TPM4_HUMAN, TPM4	Cytoplasm, Cytoskeleton	P67936 TPM4_HUMAN Tropomyosin alpha-4 chain P67936,P07226,Q15659,Q5U0D9,Q9BU85,Q9H8Q3,Q9UCS1,Q9UCS2,Q9UCS3,Q9UCS4 TM30p1, Tropomyosin-4	actin filament, cytoskeleton, cytosol, extracellular exosome, focal adhesion, membrane, muscle thin filament tropomyosin, stress fiber	tropomyosin family	http://zinc.docking.org/results/combination?filter.purchasability=purchasable&annotation.name=TPM4_HUMAN	http://cansar.icr.ac.uk/cansar/molecular-targets/P67936/				0	0	0	0	0	0	0	-3	59	1	1	0	0	1	0	0
	P16035	TIMP2	Metalloproteinase inhibitor 2		TIMP2_HUMAN, TIMP2	Secreted	P16035 TIMP2_HUMAN Metalloproteinase inhibitor 2 P16035,Q16121,Q93006,Q9UDF7 CSC-21K, Tissue inhibitor of metalloproteinases 2	cell surface, collagen-containing extracellular matrix, extracellular matrix, extracellular region, extracellular space, ficolin-1-rich granule lumen, growth cone, neuronal cell body, specific granule lumen, tertiary granule lumen	protease inhibitor I35 (TIMP) family	http://zinc.docking.org/results/combination?filter.purchasability=purchasable&annotation.name=TIMP2_HUMAN	http://cansar.icr.ac.uk/cansar/molecular-targets/P16035/				4	0	4	1	25	2	50	-3	59
	P62745	RHOB	Rho-related GTP-binding protein RhoB		RHOB_HUMAN, RHOB, ARH6, ARHB	Late endosome membrane, Cell membrane, Nucleus, Cleavage furrow	P62745 RHOB_HUMAN Rho-related GTP-binding protein RhoB P62745,B2R692,P01121,Q5U0H6,Q7RTN5,Q7RTR9,Q9CUV7 Rho cDNA clone 6 ARH6, ARHB	cleavage furrow, cytoplasm, cytosol, early endosome, endosome membrane, extracellular exosome, focal adhesion, late endosome membrane, nucleus, plasma membrane	Rho family	http://zinc.docking.org/results/combination?filter.purchasability=purchasable&annotation.name=RHOB_HUMAN	http://cansar.icr.ac.uk/cansar/molecular-targets/P62745/				3	3	3	1	34	3	100	-1.6	63	1	53	0	0	4	0	0
	P11021	HSPA5	Endoplasmic reticulum chaperone BiP	3.6.4.10	BIP_HUMAN, HSPA5, GRP78	Endoplasmic reticulum lumen, Melanosome, Cytoplasm	P11021 BIP_HUMAN Endoplasmic reticulum chaperone BiP P11021,B0QZ61,Q2EF78,Q9NPF1,Q9UK02 78 kDa glucose-regulated protein, Binding-immunoglobulin protein, Heat shock protein 70 family protein 5, Heat shock protein family A member 5, Immunoglobulin heavy chain-binding protein GRP78	cell surface, cytoplasm, cytosol, endoplasmic reticulum, endoplasmic reticulum chaperone complex, endoplasmic reticulum lumen, endoplasmic reticulum membrane, endoplasmic reticulum-golgi intermediate compartment, extracellular exosome, focal adhesion, integral component of endoplasmic reticulum membrane, intracellular membrane-bounded organelle, melanosome, membrane, midbody, mitochondrion, nucle…	heat shock protein 70 family	http://zinc.docking.org/results/combination?filter.purchasability=purchasable&annotation.name=BIP_HUMAN	http://cansar.icr.ac.uk/cansar/molecular-targets/P11021/				29	18	29	20	69	26	90	-0.95	69	1	19	0	0	12	0	0
	Q06481	APLP2	Amyloid-like protein 2		APLP2_HUMAN, APLP2, APPL2	Cell membrane, Nucleus	Q06481 APLP2_HUMAN Amyloid-like protein 2 Q06481,B3KXX9,H7BXI4,Q13861,Q14594,Q14662,Q71U10,Q7M4L3,Q9BT36 APPH, Amyloid protein homolog, CDEI box-binding protein APPL2	endoplasmic reticulum lumen, extracellular exosome, integral component of membrane, membrane, nucleus, plasma membrane, platelet alpha granule membrane	APP family	http://zinc.docking.org/results/combination?filter.purchasability=purchasable&annotation.name=APLP2_HUMAN	http://cansar.icr.ac.uk/cansar/molecular-targets/Q06481/				2	0	2	0	0	2	100	0.45	84
	P27635	RPL10	60S ribosomal protein L10		RL10_HUMAN, RPL10, DXS648E, QM		P27635 RL10_HUMAN 60S ribosomal protein L10 P27635,A3KQT0,D3DWW6,Q16470,Q2HXT7,Q53FH7,Q6FGN8,Q8TDA5 Laminin receptor homolog, Large ribosomal subunit protein uL16, Protein QM, Ribosomal protein L10, Tumor suppressor QM DXS648E, QM	cytosol, cytosolic large ribosomal subunit, endoplasmic reticulum, membrane, nucleus, protein-containing complex	universal ribosomal protein uL16 family	http://zinc.docking.org/results/combination?filter.purchasability=purchasable&annotation.name=RL10_HUMAN	http://cansar.icr.ac.uk/cansar/molecular-targets/P27635/				1	0	1	0	0	1	100	-3	59
	O14503	BHLHE40	Class E basic helix-loop-helix protein 40		BHE40_HUMAN, BHLHE40, BHLHB2, DEC1, SHARP2, STRA13	Cytoplasm, Nucleus	O14503 BHE40_HUMAN Class E basic helix-loop-helix protein 40 O14503,Q96TD3 Class B basic helix-loop-helix protein 2, Differentially expressed in chondrocytes protein 1, Enhancer-of-split and hairy-related protein 2, Stimulated by retinoic acid gene 13 protein BHLHB2, DEC1, SHARP2, STRA13	cytoplasm, nuclear body, nuclear chromatin, nucleus		http://zinc.docking.org/results/combination?filter.purchasability=purchasable&annotation.name=BHE40_HUMAN	http://cansar.icr.ac.uk/cansar/molecular-targets/O14503/				0	0	0	0	0	0	0	-0.6	73
	P50281	MMP14	Matrix metalloproteinase-14	3.4.24.80	MMP14_HUMAN, MMP14	Membrane, Melanosome, Cytoplasm	P50281 MMP14_HUMAN Matrix metalloproteinase-14 P50281,A8K5L0,Q6GSF3,Q92678 MMP-X1, Membrane-type matrix metalloproteinase 1, Membrane-type-1 matrix metalloproteinase	cytoplasmic vesicle, cytosol, extracellular matrix, extracellular space, focal adhesion, golgi lumen, integral component of plasma membrane, intermediate filament cytoskeleton, macropinosome, melanosome, nucleus, plasma membrane	peptidase M10A family	http://zinc.docking.org/results/combination?filter.purchasability=purchasable&annotation.name=MMP14_HUMAN	http://cansar.icr.ac.uk/cansar/molecular-targets/P50281/	40.80|P09237|MMP7|Doxycycline Hyclate,Doxycycline,Doxycycline Calcium,Doxycycline|Whole:::Protein		40.80|P09237|MMP7|Doxycycline Hyclate,Doxycycline,Doxycycline Calcium,Doxycycline|Whole:::Protein||37.88|P45452|MMP13|Doxycycline Hyclate,Doxycycline,Doxycycline Calcium,Doxycycline|Whole:::Protein||36.56|P22894|MMP8|Doxycycline Hyclate,Doxycycline,Doxycycline Calcium,Doxycycline|Whole:::Protein||36.53|P03956|MMP1|Doxycycline Hyclate,Doxycycline,Doxycycline Calcium,Doxycycline|Whole:::Protein	12	3	7	0	0	6	86	1.3	93	1	1086	129	98	501	71	51
	P56159	GFRA1	GDNF family receptor alpha-1		GFRA1_HUMAN, GFRA1, GDNFRA, RETL1, TRNR1	Cell membrane, Golgi apparatus, Trans-Golgi network, Endosome, Endosome, Multivesicular body	P56159 GFRA1_HUMAN GDNF family receptor alpha-1 P56159,A8KA21,O15507,O43912 RET ligand 1, TGF-beta-related neurotrophic factor receptor 1 GDNFRA, RETL1, TRNR1	anchored component of membrane, external side of plasma membrane, extracellular exosome, extrinsic component of membrane, golgi apparatus, multivesicular body, plasma membrane, receptor complex	GDNFR family	http://zinc.docking.org/results/combination?filter.purchasability=purchasable&annotation.name=GFRA1_HUMAN	http://cansar.icr.ac.uk/cansar/molecular-targets/P56159/				1	0	1	1	100	1	100	-3	59
	P78344	EIF4G2	Eukaryotic translation initiation factor 4 gamma 2		IF4G2_HUMAN, EIF4G2, DAP5		P78344 IF4G2_HUMAN Eukaryotic translation initiation factor 4 gamma 2 P78344,O60877,P78404,Q0VH00,Q0VH01,Q2NKW9,Q49A79,Q53EU1,Q58EZ2,Q8NI71,Q96C16 Death-associated protein 5, p97 DAP5	adherens junction, cytosol, eukaryotic translation initiation factor 4f complex, membrane	eukaryotic initiation factor 4G family	http://zinc.docking.org/results/combination?filter.purchasability=purchasable&annotation.name=IF4G2_HUMAN	http://cansar.icr.ac.uk/cansar/molecular-targets/P78344/				3	1	3	0	0	3	100	-3	59
	P10586	PTPRF	Receptor-type tyrosine-protein phosphatase F	3.1.3.48	PTPRF_HUMAN, PTPRF, LAR	Membrane	P10586 PTPRF_HUMAN Receptor-type tyrosine-protein phosphatase F P10586,D3DPX6,D3DPX7,Q5T021,Q5T022,Q5W9G2,Q86WS0 Leukocyte common antigen related LAR	extracellular exosome, integral component of plasma membrane, neuron projection, neuronal cell body, plasma membrane	protein-tyrosine phosphatase family	http://zinc.docking.org/results/combination?filter.purchasability=purchasable&annotation.name=PTPRF_HUMAN	http://cansar.icr.ac.uk/cansar/molecular-targets/P10586/	28.96|Q15375|EPHA7|Vandetanib|Whole:::Protein			13	2	13	2	16	9	70	0.15	81	1	606	0	0	286	0	0
	P16070	CD44	CD44 antigen		CD44_HUMAN, CD44, LHR, MDU2, MDU3, MIC4	Cell membrane, Cell projection, Microvillus	P16070 CD44_HUMAN CD44 antigen P16070,A5YRN9,B6EAT9,D3DR12,D3DR13,O95370,P22511,Q04858,Q13419,Q13957,Q13958,Q13959,Q13960,Q13961,Q13967,Q13968,Q13980,Q15861,Q16064,Q16065,Q16066,Q16208,Q16522,Q86T72,Q86Z27,Q8N694,Q92493,Q96J24,Q9H5A5,Q9UC28,Q9UC29,Q9UC30,Q9UCB0,Q9UJ36 CDw44, Epican, Extracellular matrix receptor III, GP90 lymphocyte homing/adhesion receptor, HUTCH-I, Heparan sulfate proteoglycan,…	apical plasma membrane, basolateral plasma membrane, cell projection, cell surface, cytosol, extracellular exosome, focal adhesion, golgi apparatus, integral component of plasma membrane, lamellipodium membrane, macrophage migration inhibitory factor receptor complex, microvillus, plasma membrane, secretory granule membrane		http://zinc.docking.org/results/combination?filter.purchasability=purchasable&annotation.name=CD44_HUMAN	http://cansar.icr.ac.uk/cansar/molecular-targets/P16070/				5	1	5	1	20	3	60	-3	59	1	29	0	0	12	0	0
	P61513	RPL37A	60S ribosomal protein L37a		RL37A_HUMAN, RPL37A		P61513 RL37A_HUMAN 60S ribosomal protein L37a P61513,P12751,Q6FGF5 Large ribosomal subunit protein eL43	cytosol, cytosolic large ribosomal subunit, extracellular exosome, focal adhesion, nucleus	eukaryotic ribosomal protein eL43 family	http://zinc.docking.org/results/combination?filter.purchasability=purchasable&annotation.name=RL37A_HUMAN	http://cansar.icr.ac.uk/cansar/molecular-targets/P61513/				0	0	0	0	0	0	0	-3	59
	Q01628	IFITM3	Interferon-induced transmembrane protein 3		IFM3_HUMAN, IFITM3	Cell membrane, Late endosome membrane, Lysosome membrane, Cytoplasm, Perinuclear region	Q01628 IFM3_HUMAN Interferon-induced transmembrane protein 3 Q01628,Q53Y76,Q96HK8,Q96J15 Dispanin subfamily A member 2b, Interferon-inducible protein 1-8U	integral component of membrane, late endosome membrane, lysosomal membrane, plasma membrane, protein-containing complex	CD225/Dispanin family	http://zinc.docking.org/results/combination?filter.purchasability=purchasable&annotation.name=IFM3_HUMAN	http://cansar.icr.ac.uk/cansar/molecular-targets/Q01628/				0	0	0	0	0	0	0	-3	59
	P62736	ACTA2	Actin, aortic smooth muscle		ACTA_HUMAN, ACTA2, ACTSA, ACTVS	Cytoplasm, Cytoskeleton	P62736 ACTA_HUMAN Actin, aortic smooth muscle P62736,B2R8A4,P03996,P04108,Q6FI19 Alpha-actin-2, Cell growth-inhibiting gene 46 protein ACTSA, ACTVS	actin cytoskeleton, cell body, cytoplasm, cytosol, extracellular exosome, extracellular space, filopodium, lamellipodium, protein-containing complex, smooth muscle contractile fiber	actin family	http://zinc.docking.org/results/combination?filter.purchasability=purchasable&annotation.name=ACTA_HUMAN	http://cansar.icr.ac.uk/cansar/molecular-targets/P62736/				0	0	0	0	0	0	0	-3	59
	P62263	RPS14	40S ribosomal protein S14		RS14_HUMAN, RPS14		P62263 RS14_HUMAN 40S ribosomal protein S14 P62263,B2R5G5,D3DQG5,P06366,Q5BJI0 Small ribosomal subunit protein uS11	cytosol, cytosolic small ribosomal subunit, extracellular exosome, focal adhesion, membrane, nucleolus, nucleoplasm, postsynaptic density	universal ribosomal protein uS11 family	http://zinc.docking.org/results/combination?filter.purchasability=purchasable&annotation.name=RS14_HUMAN	http://cansar.icr.ac.uk/cansar/molecular-targets/P62263/				26	0	26	4	16	18	70	-3	59
	Q9NR99	MXRA5	Matrix-remodeling-associated protein 5		MXRA5_HUMAN, MXRA5	Secreted	Q9NR99 MXRA5_HUMAN Matrix-remodeling-associated protein 5 Q9NR99,Q6P1M7,Q9Y3Y8 Adhesion protein with leucine-rich repeats and immunoglobulin domains related to perlecan	collagen-containing extracellular matrix, extracellular exosome, extracellular region		http://zinc.docking.org/results/combination?filter.purchasability=purchasable&annotation.name=MXRA5_HUMAN	http://cansar.icr.ac.uk/cansar/molecular-targets/Q9NR99/	27.23|P22607|FGFR3|Vandetanib,Pemigatinib,Pazopanib Hydrochloride,Pazopanib,Erdafitinib|Whole:::Protein			0	0	0	0	0	0	0	0.9	89
	P60660	MYL6	Myosin light polypeptide 6		MYL6_HUMAN, MYL6		P60660 MYL6_HUMAN Myosin light polypeptide 6 P60660,P16475,P24572,P24573,Q12790,Q561V9,Q6IAZ0,Q6IPY5 17 kDa myosin light chain, Myosin light chain 3, Myosin light chain alkali 3, Smooth muscle and nonmuscle myosin light chain alkali 6	brush border, cytosol, extracellular exosome, membrane, myosin complex, unconventional myosin complex, vesicle		http://zinc.docking.org/results/combination?filter.purchasability=purchasable&annotation.name=MYL6_HUMAN	http://cansar.icr.ac.uk/cansar/molecular-targets/P60660/	35.14|P63316|TNNC1|Bepridil Hydrochloride,Bepridil|Whole:::Protein		35.14|P63316|TNNC1|Bepridil Hydrochloride,Bepridil|Whole:::Protein	0	0	0	0	0	0	0	0.8	88
	P00338	LDHA	L-lactate dehydrogenase A chain	1.1.1.27	LDHA_HUMAN, LDHA	Cytoplasm	P00338 LDHA_HUMAN L-lactate dehydrogenase A chain P00338,B4DKQ2,B7Z5E3,D3DQY3,F8W819,Q53G53,Q6IBM7,Q6ZNV1,Q9UDE8,Q9UDE9 Cell proliferation-inducing gene 19 protein, LDH muscle subunit, Renal carcinoma antigen NY-REN-59	cytosol, extracellular exosome, membrane, nucleus	LDH family	http://zinc.docking.org/results/combination?filter.purchasability=purchasable&annotation.name=LDHA_HUMAN	http://cansar.icr.ac.uk/cansar/molecular-targets/P00338/				38	35	38	38	100	38	100	-0.9	70	1	459	24	5	167	21	5
	P05023	ATP1A1	Sodium/potassium-transporting ATPase subunit alpha-1	7.2.2.13	AT1A1_HUMAN, ATP1A1	Cell membrane, Sarcolemma, Melanosome	P05023 AT1A1_HUMAN Sodium/potassium-transporting ATPase subunit alpha-1 P05023,B2RBR6,B7Z2T5,B7Z3U6,F5H3A1,Q16689,Q6LDM4,Q9UCN1,Q9UJ20,Q9UJ21 Sodium pump subunit alpha-1	apical plasma membrane, basolateral plasma membrane, caveola, endoplasmic reticulum, endosome, extracellular exosome, extracellular vesicle, golgi apparatus, integral component of membrane, intercalated disc, lateral plasma membrane, melanosome, membrane, membrane raft, organelle membrane, photoreceptor inner segment membrane, plasma membrane, postsynaptic density, protein-containing complex, sar…	cation transport ATPase (P-type) (TC 3.A.3) family	http://zinc.docking.org/results/combination?filter.purchasability=purchasable&annotation.name=AT1A1_HUMAN	http://cansar.icr.ac.uk/cansar/molecular-targets/P05023/	100.00|P05023|ATP1A1|Digoxin,Digitoxin,Deslanoside,Acetyldigitoxin|Whole:::Protein	100.00|P05023|ATP1A1|Digoxin,Digitoxin,Deslanoside,Acetyldigitoxin|Whole:::Protein||88.03|P13637|ATP1A3|Acetyldigitoxin|Whole:::Protein||86.71|P50993|ATP1A2|Acetyldigitoxin|Whole:::Protein||79.88|Q13733|ATP1A4|Acetyldigitoxin|Whole:::Protein||63.95|P20648|ATP4A|Omeprazole Magnesium,Omeprazole,Lansoprazole,Esomeprazole Magnesium,Esomeprazole Sodium,Esomeprazole Strontium,Esomeprazole,Dexlansoprazo…	100.00|P05023|ATP1A1|Digoxin,Digitoxin,Deslanoside,Acetyldigitoxin|Whole:::Protein||88.03|P13637|ATP1A3|Acetyldigitoxin|Whole:::Protein||86.71|P50993|ATP1A2|Acetyldigitoxin|Whole:::Protein||79.88|Q13733|ATP1A4|Acetyldigitoxin|Whole:::Protein||63.95|P20648|ATP4A|Omeprazole Magnesium,Omeprazole,Lansoprazole,Esomeprazole Magnesium,Esomeprazole Sodium,Esomeprazole Strontium,Esomeprazole,Dexlansoprazo…	0	0	0	0	0	0	0	0.3	83	1	335	22	7	121	9	4
	P46781	RPS9	40S ribosomal protein S9		RS9_HUMAN, RPS9	Cytoplasm	P46781 RS9_HUMAN 40S ribosomal protein S9 P46781,A9C4C1,Q4QRK7,Q9BVZ0 Small ribosomal subunit protein uS4	cytoplasm, cytosol, cytosolic small ribosomal subunit, extracellular exosome, focal adhesion, membrane, nucleolus, nucleoplasm, nucleus, ribonucleoprotein complex, ribosome, small ribosomal subunit, synapse	universal ribosomal protein uS4 family	http://zinc.docking.org/results/combination?filter.purchasability=purchasable&annotation.name=RS9_HUMAN	http://cansar.icr.ac.uk/cansar/molecular-targets/P46781/				26	0	26	8	31	26	100	-3	59
	O76061	STC2	Stanniocalcin-2		STC2_HUMAN, STC2	Secreted	O76061 STC2_HUMAN Stanniocalcin-2 O76061 Stanniocalcin-related protein	endoplasmic reticulum, endoplasmic reticulum lumen, extracellular space, golgi apparatus, perinuclear region of cytoplasm	stanniocalcin family	http://zinc.docking.org/results/combination?filter.purchasability=purchasable&annotation.name=STC2_HUMAN	http://cansar.icr.ac.uk/cansar/molecular-targets/O76061/				0	0	0	0	0	0	0	-3	59
	P62829	RPL23	60S ribosomal protein L23		RL23_HUMAN, RPL23		P62829 RL23_HUMAN 60S ribosomal protein L23 P62829,P23131,P24048,Q29246,Q3SWV7,Q6P5S1 60S ribosomal protein L17, Large ribosomal subunit protein uL14	cytoplasm, cytosol, cytosolic large ribosomal subunit, extracellular exosome, focal adhesion, membrane, nucleolus, nucleoplasm, postsynaptic density, protein-containing complex, ribosome	universal ribosomal protein uL14 family	http://zinc.docking.org/results/combination?filter.purchasability=purchasable&annotation.name=RL23_HUMAN	http://cansar.icr.ac.uk/cansar/molecular-targets/P62829/				0	0	0	0	0	0	0	-3	59
	P62899	RPL31	60S ribosomal protein L31		RL31_HUMAN, RPL31		P62899 RL31_HUMAN 60S ribosomal protein L31 P62899,B7Z4K2,D3DVJ4,P12947,Q53SQ5,Q6IRZ0,Q6LBJ6 Large ribosomal subunit protein eL31	cytosol, cytosolic large ribosomal subunit, extracellular exosome, focal adhesion, membrane, polysomal ribosome	eukaryotic ribosomal protein eL31 family	http://zinc.docking.org/results/combination?filter.purchasability=purchasable&annotation.name=RL31_HUMAN	http://cansar.icr.ac.uk/cansar/molecular-targets/P62899/				0	0	0	0	0	0	0	-3	59
	P06396	GSN	Gelsolin		GELS_HUMAN, GSN	Cytoplasm, Cytoskeleton, Secreted	P06396 GELS_HUMAN Gelsolin P06396,A2A418,A8MUD1,A8MYN7,B7Z373,B7Z5V1,F5H1A8,Q5T0I2,Q8WVV7 AGEL, Actin-depolymerizing factor, Brevin	actin cap, actin cytoskeleton, blood microparticle, cortical actin cytoskeleton, cytoplasm, cytosol, extracellular exosome, extracellular region, extracellular space, ficolin-1-rich granule lumen, focal adhesion, lamellipodium, myelin sheath, perinuclear region of cytoplasm, phagocytic vesicle, plasma membrane, podosome, protein-containing complex, ruffle, sarcoplasm, secretory granule lumen	villin/gelsolin family	http://zinc.docking.org/results/combination?filter.purchasability=purchasable&annotation.name=GELS_HUMAN	http://cansar.icr.ac.uk/cansar/molecular-targets/P06396/				58	4	56	15	27	37	67	-3	59
	Q12841	FSTL1	Follistatin-related protein 1		FSTL1_HUMAN, FSTL1, FRP	Secreted	Q12841 FSTL1_HUMAN Follistatin-related protein 1 Q12841,A8K523,B4DTT5,D3DN90,Q549Z0 Follistatin-like protein 1 FRP	endoplasmic reticulum lumen, extracellular exosome, extracellular region, extracellular space		http://zinc.docking.org/results/combination?filter.purchasability=purchasable&annotation.name=FSTL1_HUMAN	http://cansar.icr.ac.uk/cansar/molecular-targets/Q12841/				1	0	1	0	0	0	0	-1.25	66
	P09871	C1S	Complement C1s subcomponent	3.4.21.42	C1S_HUMAN, C1S		P09871 C1S_HUMAN Complement C1s subcomponent P09871,D3DUT4,Q9UCU7,Q9UCU8,Q9UCU9,Q9UCV0,Q9UCV1,Q9UCV2,Q9UCV3,Q9UCV4,Q9UCV5,Q9UM14 C1 esterase, Complement component 1 subcomponent s	blood microparticle, extracellular region, extracellular space	peptidase S1 family	http://zinc.docking.org/results/combination?filter.purchasability=purchasable&annotation.name=C1S_HUMAN	http://cansar.icr.ac.uk/cansar/molecular-targets/P09871/	32.85|P00734|F2|Lepirudin,Desirudin,Dabigatran Etexilate,Dabigatran Etexilate Mesylate,Bivalirudin,Argatroban,Antithrombin Alfa|Whole:::Protein			10	2	10	1	10	8	80	0.9	89	1	163	19	8	65	8	4
	P84077	ARF1	ADP-ribosylation factor 1		ARF1_HUMAN, ARF1	Golgi apparatus, Cytoplasm, Perinuclear region, Cell junction, Synapse, Synaptosome, Cell junction, Synapse, Postsynaptic density, Membrane, Golgi apparatus, Trans-Golgi network membrane	P84077 ARF1_HUMAN ADP-ribosylation factor 1 P84077,P10947,P32889	cell leading edge, copi-coated vesicle, cytoplasm, cytosol, extracellular exosome, focal adhesion, glutamatergic synapse, golgi membrane, late endosome, neuron projection, perinuclear region of cytoplasm, peroxisomal membrane, plasma membrane, postsynaptic density, protein-containing complex, sarcomere, trans-golgi network	Arf family	http://zinc.docking.org/results/combination?filter.purchasability=purchasable&annotation.name=ARF1_HUMAN	http://cansar.icr.ac.uk/cansar/molecular-targets/P84077/				17	16	17	6	36	17	100	-1.75	61	1	2	0	0	2	0	0
	P05556	ITGB1	Integrin beta-1		ITB1_HUMAN, ITGB1, FNRB, MDF2, MSK12	Cell membrane, Cell projection, Invadopodium membrane, Cell projection, Ruffle membrane, Recycling endosome, Melanosome, Cleavage furrow, Cell projection, Lamellipodium, Cell projection, Ruffle, Cell junction, Focal adhesion, Cell surface, Cell membrane, Sarcolemma, Cell junction	P05556 ITB1_HUMAN Integrin beta-1 P05556,A8K6N2,D3DRX9,D3DRY3,D3DRY4,D3DRY5,P78466,P78467,Q13089,Q13090,Q13091,Q13212,Q14622,Q14647,Q29RW2,Q7Z3V1,Q8WUM6 Fibronectin receptor subunit beta, Glycoprotein IIa, VLA-4 subunit beta FNRB, MDF2, MSK12	cell surface, cleavage furrow, cytoplasm, dendritic spine, external side of plasma membrane, extracellular exosome, filopodium, focal adhesion, glial cell projection, glutamatergic synapse, integral component of synaptic membrane, integrin alpha1-beta1 complex, integrin alpha10-beta1 complex, integrin alpha11-beta1 complex, integrin alpha2-beta1 complex, integrin alpha3-beta1 complex, integrin al…	integrin beta chain family	http://zinc.docking.org/results/combination?filter.purchasability=purchasable&annotation.name=ITB1_HUMAN	http://cansar.icr.ac.uk/cansar/molecular-targets/P05556/	45.98|P05107|ITGB2|Lifitegrast|Whole:::Protein		45.98|P05107|ITGB2|Lifitegrast|Whole:::Protein||44.99|P05106|ITGB3|Tirofiban,Tirofiban Hydrochloride,Eptifibatide,Abciximab|Whole:::Protein	9	6	8	3	38	6	75	1.3	93	1	1942	1024	221	855	438	129
	P18827	SDC1	Syndecan-1		SDC1_HUMAN, SDC1, SDC	Membrane, Secreted, Secreted, Extracellular exosome	P18827 SDC1_HUMAN Syndecan-1 P18827,D6W523,Q53QV0,Q546D3,Q96HB7 SDC	cell surface, external side of plasma membrane, extracellular exosome, golgi lumen, integral component of plasma membrane, lysosomal lumen, plasma membrane, protein-containing complex	syndecan proteoglycan family	http://zinc.docking.org/results/combination?filter.purchasability=purchasable&annotation.name=SDC1_HUMAN	http://cansar.icr.ac.uk/cansar/molecular-targets/P18827/				3	2	0	0	0	0	0	-3	59
	P30101	PDIA3	Protein disulfide-isomerase A3	5.3.4.1	PDIA3_HUMAN, PDIA3, ERP57, ERP60, GRP58	Endoplasmic reticulum, Endoplasmic reticulum lumen, Melanosome	P30101 PDIA3_HUMAN Protein disulfide-isomerase A3 P30101,Q13453,Q14255,Q8IYF8,Q9UMU7 58 kDa glucose-regulated protein, 58 kDa microsomal protein, Disulfide isomerase ER-60, Endoplasmic reticulum resident protein 57, Endoplasmic reticulum resident protein 60 ERP57, ERP60, GRP58	cell surface, endoplasmic reticulum, endoplasmic reticulum lumen, extracellular exosome, extracellular space, focal adhesion, melanosome, mhc class i peptide loading complex, nucleus, phagocytic vesicle, recycling endosome membrane	protein disulfide isomerase family	http://zinc.docking.org/results/combination?filter.purchasability=purchasable&annotation.name=PDIA3_HUMAN	http://cansar.icr.ac.uk/cansar/molecular-targets/P30101/				5	0	5	3	60	3	60	3.1	99	1	10	0	0	5	0	0
	O43291	SPINT2	Kunitz-type protease inhibitor 2		SPIT2_HUMAN, SPINT2, HAI2, KOP	Membrane	O43291 SPIT2_HUMAN Kunitz-type protease inhibitor 2 O43291,A8K667,B4DLU1,O00271,O14895,Q5TZQ3,Q969E0 Hepatocyte growth factor activator inhibitor type 2, Placental bikunin HAI2, KOP	cytoplasm, extracellular region, integral component of membrane, plasma membrane		http://zinc.docking.org/results/combination?filter.purchasability=purchasable&annotation.name=SPIT2_HUMAN	http://cansar.icr.ac.uk/cansar/molecular-targets/O43291/				1	1	1	0	0	0	0	0.45	84
	Q9H2H9	SLC38A1	Sodium-coupled neutral amino acid transporter 1		S38A1_HUMAN, SLC38A1, ATA1, NAT2, SAT1, SNAT1	Cell membrane	Q9H2H9 S38A1_HUMAN Sodium-coupled neutral amino acid transporter 1 Q9H2H9,Q8NC61,Q8NCF8,Q96JX2,Q9H2Q2 Amino acid transporter A1, N-system amino acid transporter 2, Solute carrier family 38 member 1, System A amino acid transporter 1, System N amino acid transporter 1 ATA1, NAT2, SAT1, SNAT1	external side of apical plasma membrane, extracellular exosome, integral component of membrane, integral component of plasma membrane, neuronal cell body, plasma membrane	amino acid/polyamine transporter 2 family	http://zinc.docking.org/results/combination?filter.purchasability=purchasable&annotation.name=S38A1_HUMAN	http://cansar.icr.ac.uk/cansar/molecular-targets/Q9H2H9/				0	0	0	0	0	0	0	-3	59
	Q9BV36	MLPH	Melanophilin		MELPH_HUMAN, MLPH, SLAC2A	Cytoplasm	Q9BV36 MELPH_HUMAN Melanophilin Q9BV36,B3KSS2,B4DKW7,G5E9G5,Q9HA71 Exophilin-3, Slp homolog lacking C2 domains a, Synaptotagmin-like protein 2a SLAC2A	cortical actin cytoskeleton, dendrite, extracellular exosome, perinuclear region of cytoplasm		http://zinc.docking.org/results/combination?filter.purchasability=purchasable&annotation.name=MELPH_HUMAN	http://cansar.icr.ac.uk/cansar/molecular-targets/Q9BV36/				0	0	0	0	0	0	0	-1.6	63
	P61927	RPL37	60S ribosomal protein L37		RL37_HUMAN, RPL37		P61927 RL37_HUMAN 60S ribosomal protein L37 P61927,B2R4H2,P02403,Q6IBB4,Q99883 G1.16, Large ribosomal subunit protein eL37	cytosol, cytosolic large ribosomal subunit	eukaryotic ribosomal protein eL37 family	http://zinc.docking.org/results/combination?filter.purchasability=purchasable&annotation.name=RL37_HUMAN	http://cansar.icr.ac.uk/cansar/molecular-targets/P61927/				0	0	0	0	0	0	0	-3	59
	P08708	RPS17	40S ribosomal protein S17		RS17_HUMAN, RPS17, RPS17L		P08708 RS17_HUMAN 40S ribosomal protein S17 P08708,B2R4U4,P0CW22 Small ribosomal subunit protein eS17 RPS17L	cytosol, cytosolic small ribosomal subunit, focal adhesion, membrane, nucleoplasm, ribosome, synapse	eukaryotic ribosomal protein eS17 family	http://zinc.docking.org/results/combination?filter.purchasability=purchasable&annotation.name=RS17_HUMAN	http://cansar.icr.ac.uk/cansar/molecular-targets/P08708/				21	0	19	1	6	9	48	-0.95	69
	P62266	RPS23	40S ribosomal protein S23		RS23_HUMAN, RPS23	Cytoplasm, Cytosol, Cytoplasm, Rough endoplasmic reticulum	P62266 RS23_HUMAN 40S ribosomal protein S23 P62266,P39028,Q6IB08 Small ribosomal subunit protein uS12	cytosol, cytosolic small ribosomal subunit, endoplasmic reticulum, membrane, nucleoplasm, polysomal ribosome, ribosome, rough endoplasmic reticulum	universal ribosomal protein uS12 family	http://zinc.docking.org/results/combination?filter.purchasability=purchasable&annotation.name=RS23_HUMAN	http://cansar.icr.ac.uk/cansar/molecular-targets/P62266/				28	0	28	13	47	28	100	-3	59
	P31949	S100A11	Protein S100-A11		S10AB_HUMAN, S100A11, MLN70, S100C	Cytoplasm, Nucleus	P31949 S10AB_HUMAN Protein S100-A11 P31949,Q5VTK0 Calgizzarin, Metastatic lymph node gene 70 protein, Protein S100-C, S100 calcium-binding protein A11 MLN70, S100C	adherens junction, cytoplasm, extracellular exosome, extracellular region, extracellular space, nucleus, ruffle, secretory granule lumen	S-100 family	http://zinc.docking.org/results/combination?filter.purchasability=purchasable&annotation.name=S10AB_HUMAN	http://cansar.icr.ac.uk/cansar/molecular-targets/P31949/				3	0	1	0	0	1	100	-3	59
	P35555	FBN1	Fibrillin-1		FBN1_HUMAN, FBN1, FBN	Secreted, Secreted, Secreted, Extracellular space, Extracellular matrix	P35555 FBN1_HUMAN Fibrillin-1 P35555,B2RUU0,D2JYH6,Q15972,Q75N87 FBN	basement membrane, collagen-containing extracellular matrix, endoplasmic reticulum lumen, extracellular matrix, extracellular region, extracellular space, microfibril	fibrillin family	http://zinc.docking.org/results/combination?filter.purchasability=purchasable&annotation.name=FBN1_HUMAN	http://cansar.icr.ac.uk/cansar/molecular-targets/P35555/				11	0	11	4	37	9	82	0.6	86
	P35442	THBS2	Thrombospondin-2		TSP2_HUMAN, THBS2, TSP2		P35442 TSP2_HUMAN Thrombospondin-2 P35442,A6H8N1,A7E232,Q5RI52 TSP2	basement membrane, collagen-containing extracellular matrix, extracellular region, platelet alpha granule	thrombospondin family	http://zinc.docking.org/results/combination?filter.purchasability=purchasable&annotation.name=TSP2_HUMAN	http://cansar.icr.ac.uk/cansar/molecular-targets/P35442/				2	2	2	2	100	2	100	0.7	87
	P05387	RPLP2	60S acidic ribosomal protein P2		RLA2_HUMAN, RPLP2, D11S2243E, RPP2		P05387 RLA2_HUMAN 60S acidic ribosomal protein P2 P05387,Q6FG96 Large ribosomal subunit protein P2, Renal carcinoma antigen NY-REN-44 D11S2243E, RPP2	cytosol, cytosolic large ribosomal subunit, extracellular exosome, focal adhesion, membrane	eukaryotic ribosomal protein P1/P2 family	http://zinc.docking.org/results/combination?filter.purchasability=purchasable&annotation.name=RLA2_HUMAN	http://cansar.icr.ac.uk/cansar/molecular-targets/P05387/				7	0	3	0	0	2	67	-3	59
	P09669	COX6C	Cytochrome c oxidase subunit 6C		COX6C_HUMAN, COX6C	Mitochondrion inner membrane	P09669 COX6C_HUMAN Cytochrome c oxidase subunit 6C P09669,B2R4D7 Cytochrome c oxidase polypeptide VIc	integral component of membrane, mitochondrial inner membrane, mitochondrion	cytochrome c oxidase subunit 6c family	http://zinc.docking.org/results/combination?filter.purchasability=purchasable&annotation.name=COX6C_HUMAN	http://cansar.icr.ac.uk/cansar/molecular-targets/P09669/				1	0	1	0	0	0	0	-3	59
	Q9UQ35	SRRM2	Serine/arginine repetitive matrix protein 2		SRRM2_HUMAN, SRRM2, KIAA0324, SRL300, SRM300	Nucleus, Nucleus speckle	Q9UQ35 SRRM2_HUMAN Serine/arginine repetitive matrix protein 2 Q9UQ35,A6NKB9,D3DU97,O15038,O94803,Q6NSL3,Q6PIM3,Q6PK40,Q8IW17,Q96GY7,Q9P0G1,Q9UHA8,Q9UQ36,Q9UQ37,Q9UQ38,Q9UQ40 300 kDa nuclear matrix antigen, Serine/arginine-rich splicing factor-related nuclear matrix protein of 300 kDa, Splicing coactivator subunit SRm300, Tax-responsive enhancer element-binding protein 803 KIAA0324, SRL300, SRM300	cajal body, catalytic step 2 spliceosome, nuclear speck, nucleoplasm, nucleus, u2-type catalytic step 2 spliceosome, u2-type precatalytic spliceosome	CWC21 family	http://zinc.docking.org/results/combination?filter.purchasability=purchasable&annotation.name=SRRM2_HUMAN	http://cansar.icr.ac.uk/cansar/molecular-targets/Q9UQ35/				4	0	3	0	0	2	67	-3	59
	P30050	RPL12	60S ribosomal protein L12		RL12_HUMAN, RPL12		P30050 RL12_HUMAN 60S ribosomal protein L12 P30050,Q5VVV2,Q6PB27 Large ribosomal subunit protein uL11	cytosol, cytosolic large ribosomal subunit, extracellular exosome, focal adhesion, large ribosomal subunit, membrane, nucleolus, postsynaptic density, ribosome	universal ribosomal protein uL11 family	http://zinc.docking.org/results/combination?filter.purchasability=purchasable&annotation.name=RL12_HUMAN	http://cansar.icr.ac.uk/cansar/molecular-targets/P30050/				1	0	1	1	100	1	100	-1.45	64
	Q9NYP7	ELOVL5	Elongation of very long chain fatty acids protein 5	2.3.1.199	ELOV5_HUMAN, ELOVL5, ELOVL2	Endoplasmic reticulum membrane, Cell projection, Dendrite	Q9NYP7 ELOV5_HUMAN Elongation of very long chain fatty acids protein 5 Q9NYP7,B4DZJ2,F6SH78,Q59EL3,Q5TGH5,Q6NXE7,Q7L2S5,Q8NCG4,Q9UI22 3-keto acyl-CoA synthase ELOVL5, ELOVL fatty acid elongase 5, Fatty acid elongase 1, Very long chain 3-ketoacyl-CoA synthase 5, Very long chain 3-oxoacyl-CoA synthase 5 ELOVL2	dendrite, dendritic tree, endoplasmic reticulum, endoplasmic reticulum membrane, integral component of endoplasmic reticulum membrane, membrane, neuronal cell body	ELO family	http://zinc.docking.org/results/combination?filter.purchasability=purchasable&annotation.name=ELOV5_HUMAN	http://cansar.icr.ac.uk/cansar/molecular-targets/Q9NYP7/				0	0	0	0	0	0	0	-1.55	63	1	4	0	0	4	0	0
	P55265	ADAR	Double-stranded RNA-specific adenosine deaminase	3.5.4.37	DSRAD_HUMAN, ADAR, ADAR1, DSRAD, G1P1, IFI4	Cytoplasm, Nucleus, Cytoplasm, Nucleus, Nucleus, Nucleolus	P55265 DSRAD_HUMAN Double-stranded RNA-specific adenosine deaminase P55265,B1AQQ9,B1AQR0,D3DV76,O15223,O43859,O43860,Q9BYM3,Q9BYM4 136 kDa double-stranded RNA-binding protein, Interferon-inducible protein 4, K88DSRBP ADAR1, DSRAD, G1P1, IFI4	cytoplasm, membrane, nucleolus, nucleoplasm, nucleus, supraspliceosomal complex		http://zinc.docking.org/results/combination?filter.purchasability=purchasable&annotation.name=DSRAD_HUMAN	http://cansar.icr.ac.uk/cansar/molecular-targets/P55265/				15	0	15	2	14	9	60	-0.5	74
	Q53TN4	CYBRD1	Cytochrome b reductase 1	1.-.-.-	CYBR1_HUMAN, CYBRD1, DCYTB, FRRS3	Membrane	Q53TN4 CYBR1_HUMAN Cytochrome b reductase 1 Q53TN4,B2RE79,B4DWD7,Q6KC16,Q6KC17,Q6P147,Q6ZR51,Q9H0Q8,Q9H5G5 Duodenal cytochrome b, Ferric-chelate reductase 3 DCYTB, FRRS3	brush border membrane, extracellular exosome, integral component of membrane, lysosomal membrane, plasma membrane		http://zinc.docking.org/results/combination?filter.purchasability=purchasable&annotation.name=CYBR1_HUMAN	http://cansar.icr.ac.uk/cansar/molecular-targets/Q53TN4/				2	2	2	0	0	2	100	-1.3	65
	P02462	COL4A1	Collagen alpha-1(IV) chain		CO4A1_HUMAN, COL4A1	Secreted, Extracellular space, Extracellular matrix, Basement membrane	P02462 CO4A1_HUMAN Collagen alpha-1(IV) chain P02462,A7E2W4,B1AM70,F5H5K0,Q1P9S9,Q5VWF6,Q86X41,Q8NF88,Q9NYC5	basement membrane, collagen type iv trimer, collagen-containing extracellular matrix, endoplasmic reticulum lumen, extracellular matrix, extracellular region, extracellular space	type IV collagen family	http://zinc.docking.org/results/combination?filter.purchasability=purchasable&annotation.name=CO4A1_HUMAN	http://cansar.icr.ac.uk/cansar/molecular-targets/P02462/				4	1	4	1	25	4	100	-3	59
	P02788	LTF	Lactotransferrin	3.4.21.-	TRFL_HUMAN, LTF, GIG12, LF	Secreted, Cytoplasmic granule, Cytoplasm, Nucleus	P02788 TRFL_HUMAN Lactotransferrin P02788,A8K9U8,B2MV13,B7Z4X2,E7EQH5,O00756,Q16780,Q16785,Q16786,Q16789,Q5DSM0,Q8IU92,Q8IZH6,Q8TCD2,Q96KZ4,Q96KZ5,Q9H1Z3,Q9UCY5 Growth-inhibiting protein 12, Talalactoferrin GIG12, LF	cell surface, cytoplasm, extracellular exosome, extracellular region, extracellular space, nucleus, phagocytic vesicle lumen, protein-containing complex, secretory granule, specific granule, specific granule lumen, tertiary granule lumen	transferrin family	http://zinc.docking.org/results/combination?filter.purchasability=purchasable&annotation.name=TRFL_HUMAN	http://cansar.icr.ac.uk/cansar/molecular-targets/P02788/				32	5	24	19	80	23	96	-3	59
	Q9NP59	SLC40A1	Solute carrier family 40 member 1		S40A1_HUMAN, SLC40A1, FPN1, IREG1, SLC11A3	Cell membrane	Q9NP59 S40A1_HUMAN Solute carrier family 40 member 1 Q9NP59,Q6FI62,Q7Z4F8,Q8IVB2,Q9NRL0 Ferroportin-1, Iron-regulated transporter 1 FPN1, IREG1, SLC11A3	basolateral plasma membrane, cytoplasm, cytosol, integral component of membrane, integral component of plasma membrane, nucleoplasm, plasma membrane, synaptic vesicle	ferroportin (FP) (TC 2.A.100) family	http://zinc.docking.org/results/combination?filter.purchasability=purchasable&annotation.name=S40A1_HUMAN	http://cansar.icr.ac.uk/cansar/molecular-targets/Q9NP59/				0	0	0	0	0	0	0	-1	68	1	289	10	0	62	4	0
	P61254	RPL26	60S ribosomal protein L26		RL26_HUMAN, RPL26		P61254 RL26_HUMAN 60S ribosomal protein L26 P61254,B2R4F0,D3DTR8,Q02877,Q6IPY2 Large ribosomal subunit protein uL24	cytoplasm, cytosol, cytosolic large ribosomal subunit, cytosolic ribosome, extracellular exosome, membrane, nucleolus, nucleoplasm, ribonucleoprotein complex	universal ribosomal protein uL24 family	http://zinc.docking.org/results/combination?filter.purchasability=purchasable&annotation.name=RL26_HUMAN	http://cansar.icr.ac.uk/cansar/molecular-targets/P61254/				0	0	0	0	0	0	0	-3	59
	P06703	S100A6	Protein S100-A6		S10A6_HUMAN, S100A6, CACY	Nucleus envelope, Cytoplasm, Cell membrane	P06703 S10A6_HUMAN Protein S100-A6 P06703,D3DV39,Q5RHS4 Calcyclin, Growth factor-inducible protein 2A9, MLN 4, Prolactin receptor-associated protein, S100 calcium-binding protein A6 CACY	collagen-containing extracellular matrix, cytoplasm, cytosol, extracellular exosome, extracellular region, extrinsic component of cytoplasmic side of plasma membrane, nuclear envelope, nucleus, perinuclear region of cytoplasm, plasma membrane, ruffle	S-100 family	http://zinc.docking.org/results/combination?filter.purchasability=purchasable&annotation.name=S10A6_HUMAN	http://cansar.icr.ac.uk/cansar/molecular-targets/P06703/				6	0	6	0	0	5	84	-3	59
	P62249	RPS16	40S ribosomal protein S16		RS16_HUMAN, RPS16		P62249 RS16_HUMAN 40S ribosomal protein S16 P62249,B2RDD5,P17008 Small ribosomal subunit protein uS9	cytosol, cytosolic small ribosomal subunit, extracellular exosome, focal adhesion, membrane, nucleoplasm, small ribosomal subunit	universal ribosomal protein uS9 family	http://zinc.docking.org/results/combination?filter.purchasability=purchasable&annotation.name=RS16_HUMAN	http://cansar.icr.ac.uk/cansar/molecular-targets/P62249/				26	0	26	4	16	10	39	-3	59
	O75534	CSDE1	Cold shock domain-containing protein E1		CSDE1_HUMAN, CSDE1, D1S155E, KIAA0885, NRU, UNR	Cytoplasm, Cytoplasm, Stress granule	O75534 CSDE1_HUMAN Cold shock domain-containing protein E1 O75534,A8K281,E9PGZ0,G5E9Q2,O94961,Q5TF04,Q5TF05,Q68DF1,Q68DI9,Q9Y2S4 N-ras upstream gene protein, Protein UNR D1S155E, KIAA0885, NRU, UNR	crd-mediated mrna stability complex, cytoplasmic stress granule, cytosol, golgi apparatus, plasma membrane		http://zinc.docking.org/results/combination?filter.purchasability=purchasable&annotation.name=CSDE1_HUMAN	http://cansar.icr.ac.uk/cansar/molecular-targets/O75534/				5	0	5	0	0	5	100	-3	59
	P50895	BCAM	Basal cell adhesion molecule		BCAM_HUMAN, BCAM, LU, MSK19	Membrane	P50895 BCAM_HUMAN Basal cell adhesion molecule P50895,A8MYF9,A9YWT5,A9YWT6,Q86VC7 Auberger B antigen, B-CAM cell surface glycoprotein, F8/G253 antigen, Lutheran antigen, Lutheran blood group glycoprotein LU, MSK19	collagen-containing extracellular matrix, external side of plasma membrane, extracellular exosome, extracellular region, integral component of plasma membrane, plasma membrane		http://zinc.docking.org/results/combination?filter.purchasability=purchasable&annotation.name=BCAM_HUMAN	http://cansar.icr.ac.uk/cansar/molecular-targets/P50895/				2	0	2	0	0	1	50	0.45	84
	Q14515	SPARCL1	SPARC-like protein 1		SPRL1_HUMAN, SPARCL1	Secreted, Extracellular space, Extracellular matrix	Q14515 SPRL1_HUMAN SPARC-like protein 1 Q14515,B4E2Z0,E7ESU2,Q14800 High endothelial venule protein, MAST 9	collagen-containing extracellular matrix, endoplasmic reticulum lumen, extracellular region, extracellular space, glutamatergic synapse	SPARC family	http://zinc.docking.org/results/combination?filter.purchasability=purchasable&annotation.name=SPRL1_HUMAN	http://cansar.icr.ac.uk/cansar/molecular-targets/Q14515/				0	0	0	0	0	0	0	-3	59
	Q02790	FKBP4	Peptidyl-prolyl cis-trans isomerase FKBP4	5.2.1.8	FKBP4_HUMAN, FKBP4, FKBP52	Cytoplasm, Cytosol, Mitochondrion, Nucleus, Cytoplasm, Cytoskeleton, Cell projection, Axon	Q02790 FKBP4_HUMAN Peptidyl-prolyl cis-trans isomerase FKBP4 Q02790,D3DUQ1,Q9UCP1,Q9UCV7 51 kDa FK506-binding protein, 52 kDa FK506-binding protein, 59 kDa immunophilin, FK506-binding protein 4, FKBP59, HSP-binding immunophilin, Immunophilin FKBP52, Rotamase FKBP52	axonal growth cone, cytoplasm, cytosol, extracellular exosome, microtubule, mitochondrion, neuronal cell body, nucleoplasm, perinuclear region of cytoplasm, protein-containing complex		http://zinc.docking.org/results/combination?filter.purchasability=purchasable&annotation.name=FKBP4_HUMAN	http://cansar.icr.ac.uk/cansar/molecular-targets/Q02790/	52.58|P62942|FKBP1A|Temsirolimus,Tacrolimus,Tacrolimus,Sirolimus,Pimecrolimus,Everolimus|Whole:::Protein	52.58|P62942|FKBP1A|Temsirolimus,Tacrolimus,Tacrolimus,Sirolimus,Pimecrolimus,Everolimus|Whole:::Protein	52.58|P62942|FKBP1A|Temsirolimus,Tacrolimus,Tacrolimus,Sirolimus,Pimecrolimus,Everolimus|Whole:::Protein	11	5	11	3	28	11	100	0.7	87	1	125	2	1	70	2	1
	P46776	RPL27A	60S ribosomal protein L27a		RL27A_HUMAN, RPL27A		P46776 RL27A_HUMAN 60S ribosomal protein L27a P46776,B2R4B3 Large ribosomal subunit protein uL15	cytosol, cytosolic large ribosomal subunit, endoplasmic reticulum, membrane	universal ribosomal protein uL15 family	http://zinc.docking.org/results/combination?filter.purchasability=purchasable&annotation.name=RL27A_HUMAN	http://cansar.icr.ac.uk/cansar/molecular-targets/P46776/				1	0	0	0	0	0	0	-3	59
	Q14980	NUMA1	Nuclear mitotic apparatus protein 1		NUMA1_HUMAN, NUMA1, NMP22, NUMA	Nucleus, Nucleus, Nucleoplasm, Nucleus matrix, Chromosome, Cytoplasm, Cytoskeleton, Cytoplasm, Cytoskeleton, Microtubule organizing center, Centrosome, Cytoplasm, Cytoskeleton, Spindle pole, Cytoplasm, Cell cortex, Cell membrane, Lateral cell membrane, Cytoplasm, Cytosol, Cytoplasm, Cytoskeleton, Microtubule organizing center, Centrosome, Cytoplasm, Cytoskeleton, Spindle pole, Cytoplasm, Cytosol,…	Q14980 NUMA1_HUMAN Nuclear mitotic apparatus protein 1 Q14980,H0YH75,Q14981,Q9BTE9 Nuclear matrix protein-22, Nuclear mitotic apparatus protein, SP-H antigen NMP22, NUMA	cell cortex, cell cortex region, centrosome, chromosome, cortical microtubule, cytoplasm, cytoplasmic microtubule bundle, cytosol, dendrite, extracellular exosome, extrinsic component of plasma membrane, golgi membrane, lateral cell cortex, lateral plasma membrane, microtubule bundle, microtubule minus-end, microtubule plus-end, mitotic spindle, mitotic spindle astral microtubule, mitotic spindle…		http://zinc.docking.org/results/combination?filter.purchasability=purchasable&annotation.name=NUMA1_HUMAN	http://cansar.icr.ac.uk/cansar/molecular-targets/Q14980/				4	0	2	0	0	1	50	1.7	96
	P98160	HSPG2	Basement membrane-specific heparan sulfate proteoglycan core protein		PGBM_HUMAN, HSPG2	Secreted, Extracellular space, Extracellular matrix, Basement membrane	P98160 PGBM_HUMAN Basement membrane-specific heparan sulfate proteoglycan core protein P98160,Q16287,Q5SZI3,Q9H3V5 Perlecan	basement membrane, collagen-containing extracellular matrix, extracellular exosome, extracellular region, extracellular space, focal adhesion, golgi lumen, lysosomal lumen, plasma membrane, plasma membrane protein complex		http://zinc.docking.org/results/combination?filter.purchasability=purchasable&annotation.name=PGBM_HUMAN	http://cansar.icr.ac.uk/cansar/molecular-targets/P98160/	26.38|P22455|FGFR4|Erdafitinib|Whole:::Protein			2	0	2	1	50	2	100	1.2	92
	Q13765	NACA	Nascent polypeptide-associated complex subunit alpha		NACA_HUMAN, NACA	Cytoplasm, Nucleus	Q13765 NACA_HUMAN Nascent polypeptide-associated complex subunit alpha Q13765,A8MTN7,B2R4P8,F8VU71,Q3KQV4,Q53A18,Q53G46 Alpha-NAC	cytoplasm, extracellular exosome, nascent polypeptide-associated complex, nucleus	NAC-alpha family	http://zinc.docking.org/results/combination?filter.purchasability=purchasable&annotation.name=NACA_HUMAN	http://cansar.icr.ac.uk/cansar/molecular-targets/Q13765/				3	0	3	0	0	0	0	-3	59
	E9PAV3	NACA	Nascent polypeptide-associated complex subunit alpha, muscle-specific form		NACAM_HUMAN, NACA	Cytoplasm, Nucleus	E9PAV3 NACAM_HUMAN Nascent polypeptide-associated complex subunit alpha, muscle-specific form E9PAV3 Alpha-NAC, muscle-specific form	cytoplasm, nascent polypeptide-associated complex, nucleus		http://zinc.docking.org/results/combination?filter.purchasability=purchasable&annotation.name=NACAM_HUMAN	http://cansar.icr.ac.uk/cansar/molecular-targets/E9PAV3/				2	0	2	0	0	0	0	-3	59
	P08572	COL4A2	Collagen alpha-2(IV) chain		CO4A2_HUMAN, COL4A2	Secreted, Extracellular space, Extracellular matrix, Basement membrane	P08572 CO4A2_HUMAN Collagen alpha-2(IV) chain P08572,Q14052,Q548C3,Q5VZA9,Q66K23	collagen type iv trimer, collagen-containing extracellular matrix, endoplasmic reticulum lumen, extracellular exosome, extracellular matrix, extracellular region, extracellular space	type IV collagen family	http://zinc.docking.org/results/combination?filter.purchasability=purchasable&annotation.name=CO4A2_HUMAN	http://cansar.icr.ac.uk/cansar/molecular-targets/P08572/				4	1	4	2	50	4	100	-3	59
	P04626	ERBB2	Receptor tyrosine-protein kinase erbB-2	2.7.10.1	ERBB2_HUMAN, ERBB2, HER2, MLN19, NEU, NGL	Cell membrane, Early endosome, Cytoplasm, Perinuclear region, Nucleus, Cytoplasm, Nucleus, Cytoplasm, Nucleus	P04626 ERBB2_HUMAN Receptor tyrosine-protein kinase erbB-2 P04626,B2RZG3,B4DHN3,Q14256,Q6LDV1,Q9UMK4,X5D2V5 Metastatic lymph node gene 19 protein, Proto-oncogene Neu, Proto-oncogene c-ErbB-2, Tyrosine kinase-type cell surface receptor HER2, p185erbB2 HER2, MLN19, NEU, NGL	apical plasma membrane, basal plasma membrane, basolateral plasma membrane, cytosol, early endosome, endosome membrane, erbb3, integral component of membrane, integral component of plasma membrane, myelin sheath, nucleus, perinuclear region of cytoplasm, plasma membrane, receptor complex	Tyr protein kinase family	http://zinc.docking.org/results/combination?filter.purchasability=purchasable&annotation.name=ERBB2_HUMAN	http://cansar.icr.ac.uk/cansar/molecular-targets/P04626/	100.00|P04626|ERBB2|Vandetanib,Tucatinib,TRASTUZUMAB-PKRB,Trastuzumab,Pertuzumab,Lapatinib Ditosylate,Lapatinib,Lanreotide Acetate,Lanreotide,Dacomitinib,Dacomitinib,Afatinib Dimaleate,Afatinib,ADO-TRASTUZUMAB EMTANSINE|Whole:::Protein	100.00|P04626|ERBB2|Vandetanib,Tucatinib,TRASTUZUMAB-PKRB,Trastuzumab,Pertuzumab,Lapatinib Ditosylate,Lapatinib,Lanreotide Acetate,Lanreotide,Dacomitinib,Dacomitinib,Afatinib Dimaleate,Afatinib,ADO-TRASTUZUMAB EMTANSINE|Whole:::Protein	100.00|P04626|ERBB2|Vandetanib,Tucatinib,TRASTUZUMAB-PKRB,Trastuzumab,Pertuzumab,Lapatinib Ditosylate,Lapatinib,Lanreotide Acetate,Lanreotide,Dacomitinib,Dacomitinib,Afatinib Dimaleate,Afatinib,ADO-TRASTUZUMAB EMTANSINE|Whole:::Protein||49.68|P00533|EGFR|Vandetanib,Regorafenib,Panitumumab,Osimertinib Mesylate,Osimertinib,Necitumumab,Lapatinib Ditosylate,Lapatinib,Gefitinib,Erlotinib Hydrochloride…	33	15	26	14	54	20	77	1.3	93	1	5609	1158	396	2399	509	187
	P55317	FOXA1	Hepatocyte nuclear factor 3-alpha		FOXA1_HUMAN, FOXA1, HNF3A, TCF3A	Nucleus	P55317 FOXA1_HUMAN Hepatocyte nuclear factor 3-alpha P55317,B2R9H6,B7ZAP5,Q9H2A0 Forkhead box protein A1, Transcription factor 3A HNF3A, TCF3A	fibrillar center, microvillus, nuclear chromatin, nucleoplasm, nucleus		http://zinc.docking.org/results/combination?filter.purchasability=purchasable&annotation.name=FOXA1_HUMAN	http://cansar.icr.ac.uk/cansar/molecular-targets/P55317/				0	0	0	0	0	0	0	-3	59
	P62244	RPS15A	40S ribosomal protein S15a		RS15A_HUMAN, RPS15A		P62244 RS15A_HUMAN 40S ribosomal protein S15a P62244,P39027,P39031,Q3MHD9,Q8C023,Q9BV24 Small ribosomal subunit protein uS8	cytoplasm, cytosol, cytosolic small ribosomal subunit, extracellular exosome, membrane, nucleoplasm	universal ribosomal protein uS8 family	http://zinc.docking.org/results/combination?filter.purchasability=purchasable&annotation.name=RS15A_HUMAN	http://cansar.icr.ac.uk/cansar/molecular-targets/P62244/				26	0	26	4	16	16	62	-3	59
	P05155	SERPING1	Plasma protease C1 inhibitor		IC1_HUMAN, SERPING1, C1IN, C1NH	Secreted	P05155 IC1_HUMAN Plasma protease C1 inhibitor P05155,A6NMU0,A8KAI9,B2R6L5,B4E1F0,B4E1H2,Q16304,Q547W3,Q59EI5,Q7Z455,Q96FE0,Q9UC49,Q9UCF9 C1 esterase inhibitor, C1-inhibiting factor, Serpin G1 C1IN, C1NH	blood microparticle, collagen-containing extracellular matrix, extracellular exosome, extracellular region, extracellular space, platelet alpha granule lumen	serpin family	http://zinc.docking.org/results/combination?filter.purchasability=purchasable&annotation.name=IC1_HUMAN	http://cansar.icr.ac.uk/cansar/molecular-targets/P05155/				3	2	3	0	0	3	100	-3	59
	P0CG47	UBB	Polyubiquitin-B		UBB_HUMAN, UBB	Cytoplasm, Nucleus	P0CG47 UBB_HUMAN Polyubiquitin-B P0CG47,P02248,P02249,P02250,P62988,Q29120,Q6LBL4,Q6LDU5,Q8WYN8,Q91887,Q91888,Q9BWD6,Q9BX98,Q9UEF2,Q9UEG1,Q9UEK8,Q9UPK7	cytoplasm, cytosol, endocytic vesicle membrane, endoplasmic reticulum membrane, endosome membrane, extracellular exosome, extracellular space, host cell, mitochondrial outer membrane, mitochondrion, neuron projection, neuronal cell body, nucleoplasm, nucleus, plasma membrane, vesicle	ubiquitin family	http://zinc.docking.org/results/combination?filter.purchasability=purchasable&annotation.name=UBB_HUMAN	http://cansar.icr.ac.uk/cansar/molecular-targets/P0CG47/				221	9	218	20	10	98	45	0.95	90
	P08962	CD63	CD63 antigen		CD63_HUMAN, CD63, MLA1, TSPAN30	Cell membrane, Lysosome membrane, Late endosome membrane, Endosome, Multivesicular body, Melanosome, Secreted, Extracellular exosome, Cell surface	P08962 CD63_HUMAN CD63 antigen P08962,F8VZE2,Q5TZP3,Q8N6Z9,Q9UCG6 Granulophysin, Lysosomal-associated membrane protein 3, Melanoma-associated antigen ME491, OMA81H, Ocular melanoma-associated antigen, Tetraspanin-30 MLA1, TSPAN30	azurophil granule membrane, cell surface, endosome lumen, endosome membrane, extracellular exosome, extracellular space, integral component of plasma membrane, intrinsic component of plasma membrane, late endosome membrane, lysosomal membrane, melanosome, multivesicular body membrane, multivesicular body, plasma membrane, platelet dense granule membrane	tetraspanin (TM4SF) family	http://zinc.docking.org/results/combination?filter.purchasability=purchasable&annotation.name=CD63_HUMAN	http://cansar.icr.ac.uk/cansar/molecular-targets/P08962/				0	0	0	0	0	0	0	-0.9	70	1	11	1	1	7	1	1
	Q04900	CD164	Sialomucin core protein 24		MUC24_HUMAN, CD164	Lysosome membrane, Endosome membrane, Cell membrane, Secreted	Q04900 MUC24_HUMAN Sialomucin core protein 24 Q04900,B4DQ85,E1P5E7,E1P5E8,E1P5E9,O95413,Q5JSU6,Q9BPV0,Q9NR26 Endolyn, Multi-glycosylated core protein 24	cytoplasmic vesicle, endosome, endosome membrane, extracellular region, integral component of plasma membrane, lysosomal membrane, lysosome, plasma membrane	CD164 family	http://zinc.docking.org/results/combination?filter.purchasability=purchasable&annotation.name=MUC24_HUMAN	http://cansar.icr.ac.uk/cansar/molecular-targets/Q04900/				0	0	0	0	0	0	0	-3	59
	O14745	SLC9A3R1	Na(+)/H(+) exchange regulatory cofactor NHE-RF1		NHRF1_HUMAN, SLC9A3R1, NHERF, NHERF1	Cytoplasm, Apical cell membrane, Endomembrane system, Cell projection, Filopodium, Cell projection, Ruffle, Cell projection, Microvillus	O14745 NHRF1_HUMAN Na(+)/H(+) exchange regulatory cofactor NHE-RF1 O14745,B3KY21,O43552,Q86WQ5 Ezrin-radixin-moesin-binding phosphoprotein 50, Regulatory cofactor of Na(+)/H(+) exchanger, Sodium-hydrogen exchanger regulatory factor 1, Solute carrier family 9 isoform A3 regulatory factor 1 NHERF, NHERF1	actin cytoskeleton, apical plasma membrane, brush border membrane, cell periphery, cytoplasm, endomembrane system, extracellular exosome, filopodium, membrane, membrane raft, microvillus, microvillus membrane, perinuclear region of cytoplasm, plasma membrane protein complex, ruffle, sperm midpiece, stereocilium tip, vesicle		http://zinc.docking.org/results/combination?filter.purchasability=purchasable&annotation.name=NHRF1_HUMAN	http://cansar.icr.ac.uk/cansar/molecular-targets/O14745/				20	0	18	1	6	15	84	0.4	84
	P07737	PFN1	Profilin-1		PROF1_HUMAN, PFN1	Cytoplasm, Cytoskeleton	P07737 PROF1_HUMAN Profilin-1 P07737,Q53Y44 Epididymis tissue protein Li 184a, Profilin I	blood microparticle, cell cortex, cytoplasm, cytoskeleton, cytosol, extracellular exosome, focal adhesion, glutamatergic synapse, membrane, nucleus	profilin family	http://zinc.docking.org/results/combination?filter.purchasability=purchasable&annotation.name=PROF1_HUMAN	http://cansar.icr.ac.uk/cansar/molecular-targets/P07737/				15	0	15	0	0	5	34	-3	59
	P46782	RPS5	40S ribosomal protein S5		RS5_HUMAN, RPS5		P46782 RS5_HUMAN 40S ribosomal protein S5 P46782,B2R4T2,Q96BN0 Small ribosomal subunit protein uS7	cytosol, cytosolic small ribosomal subunit, extracellular exosome, focal adhesion, membrane, nucleoplasm, ribonucleoprotein complex, ribosome	universal ribosomal protein uS7 family	http://zinc.docking.org/results/combination?filter.purchasability=purchasable&annotation.name=RS5_HUMAN	http://cansar.icr.ac.uk/cansar/molecular-targets/P46782/				26	0	26	8	31	25	97	-3	59
	P29692	EEF1D	Elongation factor 1-delta		EF1D_HUMAN, EEF1D, EF1D	Nucleus	P29692 EF1D_HUMAN Elongation factor 1-delta P29692,B4DDU4,D3DWK3,E9PBQ9,Q4VBZ6,Q969J1,Q96I38 Antigen NY-CO-4 EF1D	cytoplasm, cytosol, eukaryotic translation elongation factor 1 complex, fibrillar center, nucleoplasm, nucleus	EF-1-beta/EF-1-delta family	http://zinc.docking.org/results/combination?filter.purchasability=purchasable&annotation.name=EF1D_HUMAN	http://cansar.icr.ac.uk/cansar/molecular-targets/P29692/				4	0	4	0	0	2	50	-3	59
	P50238	CRIP1	Cysteine-rich protein 1		CRIP1_HUMAN, CRIP1, CRIP, CRP1		P50238 CRIP1_HUMAN Cysteine-rich protein 1 P50238,H3BPI2,Q13628,Q53XY7,Q96J34 Cysteine-rich heart protein, Cysteine-rich intestinal protein CRIP, CRP1	cytoplasm		http://zinc.docking.org/results/combination?filter.purchasability=purchasable&annotation.name=CRIP1_HUMAN	http://cansar.icr.ac.uk/cansar/molecular-targets/P50238/				0	0	0	0	0	0	0	-3	59
	Q07352	ZFP36L1	mRNA decay activator protein ZFP36L1		TISB_HUMAN, ZFP36L1, BERG36, BRF1, ERF1, RNF162B, TIS11B	Nucleus, Cytoplasm, Cytoplasmic granule, Cytoplasm, P-body	Q07352 TISB_HUMAN mRNA decay activator protein ZFP36L1 Q07352,Q13851 Butyrate response factor 1, EGF-response factor 1, TPA-induced sequence 11b, Zinc finger protein 36, C3H1 type-like 1 BERG36, BRF1, ERF1, RNF162B, TIS11B	cytoplasm, cytosol, nucleus, p-body, ribonucleoprotein complex		http://zinc.docking.org/results/combination?filter.purchasability=purchasable&annotation.name=TISB_HUMAN	http://cansar.icr.ac.uk/cansar/molecular-targets/Q07352/				0	0	0	0	0	0	0	-3	59
	P13747	HLA-E	HLA class I histocompatibility antigen, alpha chain E		HLAE_HUMAN, HLA-E, HLA-6.2, HLAE	Cell membrane, Golgi apparatus membrane, Secreted	P13747 HLAE_HUMAN HLA class I histocompatibility antigen, alpha chain E P13747,E2G051,Q30169,Q6DU44,Q9BT83,Q9GIY7,Q9GIY8 MHC class I antigen E HLA-6.2, HLAE	cell surface, early endosome membrane, er to golgi transport vesicle membrane, external side of plasma membrane, extracellular exosome, extracellular space, golgi membrane, integral component of lumenal side of endoplasmic reticulum membrane, mhc class i protein complex, mhc class ib protein complex, phagocytic vesicle membrane, plasma membrane, recycling endosome membrane	MHC class I family	http://zinc.docking.org/results/combination?filter.purchasability=purchasable&annotation.name=HLAE_HUMAN	http://cansar.icr.ac.uk/cansar/molecular-targets/P13747/				16	0	16	12	75	16	100	-0.15	78
	Q00341	HDLBP	Vigilin		VIGLN_HUMAN, HDLBP, HBP, VGL	Cytoplasm, Nucleus	Q00341 VIGLN_HUMAN Vigilin Q00341,B4DTQ2,E7EM71,Q53QU2,Q9UCY3 High density lipoprotein-binding protein HBP, VGL	cytoplasm, cytosol, high-density lipoprotein particle, nucleus, plasma membrane, polysome		http://zinc.docking.org/results/combination?filter.purchasability=purchasable&annotation.name=VIGLN_HUMAN	http://cansar.icr.ac.uk/cansar/molecular-targets/Q00341/				8	0	8	0	0	4	50	-1.3	65
	P62906	RPL10A	60S ribosomal protein L10a		RL10A_HUMAN, RPL10A, NEDD6		P62906 RL10A_HUMAN 60S ribosomal protein L10a P62906,B2R801,P52859,P53025,Q5TZT6,Q8J013 CSA-19, Large ribosomal subunit protein uL1, Neural precursor cell expressed developmentally down-regulated protein 6 NEDD6	cytosol, cytosolic large ribosomal subunit, extracellular exosome, focal adhesion, membrane, nucleus, polysomal ribosome, postsynaptic density	universal ribosomal protein uL1 family	http://zinc.docking.org/results/combination?filter.purchasability=purchasable&annotation.name=RL10A_HUMAN	http://cansar.icr.ac.uk/cansar/molecular-targets/P62906/				0	0	0	0	0	0	0	-3	59
	P30408	TM4SF1	Transmembrane 4 L6 family member 1		T4S1_HUMAN, TM4SF1, M3S1, TAAL6	Membrane	P30408 T4S1_HUMAN Transmembrane 4 L6 family member 1 P30408,Q6IB51 Membrane component chromosome 3 surface marker 1, Tumor-associated antigen L6 M3S1, TAAL6	integral component of membrane, integral component of plasma membrane	L6 tetraspanin family	http://zinc.docking.org/results/combination?filter.purchasability=purchasable&annotation.name=T4S1_HUMAN	http://cansar.icr.ac.uk/cansar/molecular-targets/P30408/				0	0	0	0	0	0	0	-3	59
	P09758	TACSTD2	Tumor-associated calcium signal transducer 2		TACD2_HUMAN, TACSTD2, GA733-1, M1S1, TROP2	Membrane	P09758 TACD2_HUMAN Tumor-associated calcium signal transducer 2 P09758,Q15658,Q6FG48,Q7Z7Q4,Q96QD2 Cell surface glycoprotein Trop-2, Membrane component chromosome 1 surface marker 1, Pancreatic carcinoma marker protein GA733-1 GA733-1, M1S1, TROP2	basal plasma membrane, cytosol, extracellular exosome, extracellular space, integral component of membrane, lateral plasma membrane, membrane, nucleus	EPCAM family	http://zinc.docking.org/results/combination?filter.purchasability=purchasable&annotation.name=TACD2_HUMAN	http://cansar.icr.ac.uk/cansar/molecular-targets/P09758/				3	0	0	0	0	0	0	-3	59
	P47914	RPL29	60S ribosomal protein L29		RL29_HUMAN, RPL29		P47914 RL29_HUMAN 60S ribosomal protein L29 P47914,A8K0H3,B2R4M8,Q6IPY3 Cell surface heparin-binding protein HIP, Large ribosomal subunit protein eL29	cytosol, cytosolic large ribosomal subunit, membrane	eukaryotic ribosomal protein eL29 family	http://zinc.docking.org/results/combination?filter.purchasability=purchasable&annotation.name=RL29_HUMAN	http://cansar.icr.ac.uk/cansar/molecular-targets/P47914/				0	0	0	0	0	0	0	-3	59
	P35613	BSG	Basigin		BASI_HUMAN, BSG	Cell membrane, Melanosome	P35613 BASI_HUMAN Basigin P35613,A6NJW1,D3YLG5,Q7Z796,Q8IZL7 5F7, Collagenase stimulatory factor, Extracellular matrix metalloproteinase inducer, Leukocyte activation antigen M6, OK blood group antigen, Tumor cell-derived collagenase stimulatory factor	acrosomal membrane, axon, extracellular exosome, focal adhesion, golgi membrane, integral component of plasma membrane, intracellular membrane-bounded organelle, melanosome, membrane, membrane raft, mitochondrion, plasma membrane, sarcolemma		http://zinc.docking.org/results/combination?filter.purchasability=purchasable&annotation.name=BASI_HUMAN	http://cansar.icr.ac.uk/cansar/molecular-targets/P35613/				8	0	8	0	0	7	88	-0.45	74
	Q06830	PRDX1	Peroxiredoxin-1	1.11.1.24	PRDX1_HUMAN, PRDX1, PAGA, PAGB, TDPX2	Cytoplasm, Melanosome	Q06830 PRDX1_HUMAN Peroxiredoxin-1 Q06830,B5BU26,D3DPZ8,P35703,Q2V576,Q5T154,Q5T155 Natural killer cell-enhancing factor A, Proliferation-associated gene protein, Thioredoxin peroxidase 2, Thioredoxin-dependent peroxide reductase 2, Thioredoxin-dependent peroxiredoxin 1 PAGA, PAGB, TDPX2	cytoplasm, cytosol, extracellular exosome, extracellular space, melanosome, nucleus	peroxiredoxin family	http://zinc.docking.org/results/combination?filter.purchasability=purchasable&annotation.name=PRDX1_HUMAN	http://cansar.icr.ac.uk/cansar/molecular-targets/Q06830/				3	1	3	0	0	2	67	-3	59	1	5	0	0	5	0	0
	P02545	LMNA	Prelamin-A/C		LMNA_HUMAN, LMNA, LMN1	Nucleus, Nucleus envelope, Nucleus lamina, Nucleus, Nucleoplasm, Nucleus speckle	P02545 LMNA_HUMAN Prelamin-A/C P02545,B4DI32,D3DVB0,D6RAQ3,E7EUI9,P02546,Q5I6Y4,Q5I6Y6,Q5TCJ2,Q5TCJ3,Q6UYC3,Q969I8,Q96JA2 LMN1	cytosol, intermediate filament, lamin filament, nuclear body, nuclear envelope, nuclear lamina, nuclear membrane, nuclear speck, nucleoplasm, nucleus, perinuclear region of cytoplasm	intermediate filament family	http://zinc.docking.org/results/combination?filter.purchasability=purchasable&annotation.name=LMNA_HUMAN	http://cansar.icr.ac.uk/cansar/molecular-targets/P02545/				13	0	12	0	0	4	34	-3	59
	Q9NQ36	SCUBE2	Signal peptide, CUB and EGF-like domain-containing protein 2		SCUB2_HUMAN, SCUBE2, CEGP1	Secreted, Cell surface	Q9NQ36 SCUB2_HUMAN Signal peptide, CUB and EGF-like domain-containing protein 2 Q9NQ36,Q2NKQ8,Q6ZWI1 Protein CEGP1, Scube/You CEGP1	cell surface, extracellular region, extracellular space		http://zinc.docking.org/results/combination?filter.purchasability=purchasable&annotation.name=SCUB2_HUMAN	http://cansar.icr.ac.uk/cansar/molecular-targets/Q9NQ36/				0	0	0	0	0	0	0	1.4	94
	P21860	ERBB3	Receptor tyrosine-protein kinase erbB-3	2.7.10.1	ERBB3_HUMAN, ERBB3, HER3	Cell membrane, Secreted	P21860 ERBB3_HUMAN Receptor tyrosine-protein kinase erbB-3 P21860,A8K6L6,B4DIK7,B4DV32,E9PDT8,Q9BUD7 Proto-oncogene-like protein c-ErbB-3, Tyrosine kinase-type cell surface receptor HER3 HER3	apical plasma membrane, basal plasma membrane, basolateral plasma membrane, erbb3, extracellular space, integral component of plasma membrane, lateral plasma membrane, plasma membrane, receptor complex	Tyr protein kinase family	http://zinc.docking.org/results/combination?filter.purchasability=purchasable&annotation.name=ERBB3_HUMAN	http://cansar.icr.ac.uk/cansar/molecular-targets/P21860/	100.00|P21860|ERBB3|Vandetanib|Whole:::Protein	100.00|P21860|ERBB3|Vandetanib|Whole:::Protein||58.51|Q15303|ERBB4|Vandetanib,Dacomitinib,Dacomitinib,Afatinib Dimaleate,Afatinib|Whole:::Protein	100.00|P21860|ERBB3|Vandetanib|Whole:::Protein||58.51|Q15303|ERBB4|Vandetanib,Dacomitinib,Dacomitinib,Afatinib Dimaleate,Afatinib|Whole:::Protein||48.51|P00533|EGFR|Vandetanib,Regorafenib,Panitumumab,Osimertinib Mesylate,Osimertinib,Necitumumab,Lapatinib Ditosylate,Lapatinib,Gefitinib,Erlotinib Hydrochloride,Erlotinib,Dacomitinib,Dacomitinib,Cetuximab,Afatinib Dimaleate,Afatinib|Whole:::Protein||…	15	14	15	10	67	14	94	-0.2	77	1	1123	369	169	524	182	81
	P20290	BTF3	Transcription factor BTF3		BTF3_HUMAN, BTF3, NACB	Cytoplasm, Nucleus	P20290 BTF3_HUMAN Transcription factor BTF3 P20290,A8K510,Q13893,Q76M56 Nascent polypeptide-associated complex subunit beta, RNA polymerase B transcription factor 3 NACB	cytosol, nascent polypeptide-associated complex, nucleus, polysomal ribosome	NAC-beta family	http://zinc.docking.org/results/combination?filter.purchasability=purchasable&annotation.name=BTF3_HUMAN	http://cansar.icr.ac.uk/cansar/molecular-targets/P20290/				2	0	2	0	0	1	50	-3	59
	Q9Y287	ITM2B	Integral membrane protein 2B		ITM2B_HUMAN, ITM2B, BRI, BRI2	Golgi apparatus membrane, Cell membrane, Endosome membrane, Secreted, Secreted	Q9Y287 ITM2B_HUMAN Integral membrane protein 2B Q9Y287,Q5W0A3,Q96B24,Q9NYH1 Immature BRI2, Protein E25B, Transmembrane protein BRI BRI, BRI2	endosome membrane, extracellular exosome, extracellular region, extracellular space, golgi apparatus, golgi membrane, golgi-associated vesicle membrane, integral component of organelle membrane, intracellular membrane-bounded organelle, membrane, plasma membrane	ITM2 family	http://zinc.docking.org/results/combination?filter.purchasability=purchasable&annotation.name=ITM2B_HUMAN	http://cansar.icr.ac.uk/cansar/molecular-targets/Q9Y287/				0	0	0	0	0	0	0	-3	59
	P18077	RPL35A	60S ribosomal protein L35a		RL35A_HUMAN, RPL35A		P18077 RL35A_HUMAN 60S ribosomal protein L35a P18077,Q08ES9,Q9BVN7 Cell growth-inhibiting gene 33 protein, Large ribosomal subunit protein eL33	cytosol, cytosolic large ribosomal subunit, extracellular exosome, membrane	eukaryotic ribosomal protein eL33 family	http://zinc.docking.org/results/combination?filter.purchasability=purchasable&annotation.name=RL35A_HUMAN	http://cansar.icr.ac.uk/cansar/molecular-targets/P18077/				0	0	0	0	0	0	0	-3	59
	Q53EL6	PDCD4	Programmed cell death protein 4		PDCD4_HUMAN, PDCD4, H731	Nucleus, Cytoplasm	Q53EL6 PDCD4_HUMAN Programmed cell death protein 4 Q53EL6,B2RCV4,B5ME91,O15501,Q5VZS6,Q6PJI5,Q8TAR5,Q99834 Neoplastic transformation inhibitor protein, Nuclear antigen H731-like, Protein 197/15a H731	cytoplasm, cytosol, nucleus	PDCD4 family	http://zinc.docking.org/results/combination?filter.purchasability=purchasable&annotation.name=PDCD4_HUMAN	http://cansar.icr.ac.uk/cansar/molecular-targets/Q53EL6/				5	0	5	3	60	4	80	-1.9	59	1	20	1	0	4	1	0
	P22626	HNRNPA2B1	Heterogeneous nuclear ribonucleoproteins A2/B1		ROA2_HUMAN, HNRNPA2B1, HNRPA2B1	Nucleus, Nucleus, Nucleoplasm, Cytoplasm, Cytoplasmic granule, Secreted, Extracellular exosome, Nucleus, Cytoplasm	P22626 ROA2_HUMAN Heterogeneous nuclear ribonucleoproteins A2/B1 P22626,A0A024RA27,A0A024RA61,A8K064,P22627,Q9UC98,Q9UDJ2 HNRPA2B1	cajal body, catalytic step 2 spliceosome, chromosome, cytoplasm, extracellular exosome, membrane, nuclear matrix, nucleoplasm, nucleus, ribonucleoprotein complex, spliceosomal complex		http://zinc.docking.org/results/combination?filter.purchasability=purchasable&annotation.name=ROA2_HUMAN	http://cansar.icr.ac.uk/cansar/molecular-targets/P22626/				7	0	5	3	60	5	100	-1.15	67	1	3	0	0	2	0	0
	P12236	SLC25A6	ADP/ATP translocase 3		ADT3_HUMAN, SLC25A6, ANT3	Mitochondrion inner membrane	P12236 ADT3_HUMAN ADP/ATP translocase 3 P12236,Q96C49 ADP,ATP carrier protein 3, ADP,ATP carrier protein, isoform T2, Adenine nucleotide translocator 3, Solute carrier family 25 member 6 ANT3	integral component of membrane, mitochondrial inner membrane, mitochondrion, nucleus, tim23 mitochondrial import inner membrane translocase complex	mitochondrial carrier (TC 2.A.29) family	http://zinc.docking.org/results/combination?filter.purchasability=purchasable&annotation.name=ADT3_HUMAN	http://cansar.icr.ac.uk/cansar/molecular-targets/P12236/				0	0	0	0	0	0	0	-3	59	1	240	1	0	221	1	0
	O75368	SH3BGRL	SH3 domain-binding glutamic acid-rich-like protein		SH3L1_HUMAN, SH3BGRL		O75368 SH3L1_HUMAN SH3 domain-binding glutamic acid-rich-like protein O75368,Q3SYL1,Q5JT50,Q6FIE8,Q9H0N8	cytoplasm, extracellular exosome, extracellular space, nucleus	SH3BGR family	http://zinc.docking.org/results/combination?filter.purchasability=purchasable&annotation.name=SH3L1_HUMAN	http://cansar.icr.ac.uk/cansar/molecular-targets/O75368/				2	0	2	0	0	1	50	-0.9	70
	P42224	STAT1	Signal transducer and activator of transcription 1-alpha/beta		STAT1_HUMAN, STAT1	Cytoplasm, Nucleus	P42224 STAT1_HUMAN Signal transducer and activator of transcription 1-alpha/beta P42224,A8K989,B2RCA0,D2KFR8,D3DPI7,Q53S88,Q53XW4,Q68D00,Q9UDL5 Transcription factor ISGF-3 components p91/p84	axon, cytoplasm, cytosol, dendrite, nuclear chromatin, nucleolus, nucleoplasm, nucleus, perinuclear region of cytoplasm, protein-containing complex	transcription factor STAT family	http://zinc.docking.org/results/combination?filter.purchasability=purchasable&annotation.name=STAT1_HUMAN	http://cansar.icr.ac.uk/cansar/molecular-targets/P42224/				4	0	4	2	50	4	100	0.4	84	1	221	0	0	120	0	0
	P06753	TPM3	Tropomyosin alpha-3 chain		TPM3_HUMAN, TPM3	Cytoplasm, Cytoskeleton	P06753 TPM3_HUMAN Tropomyosin alpha-3 chain P06753,D3DV71,P12324,Q2QD06,Q5VU58,Q5VU63,Q5VU66,Q5VU71,Q5VU72,Q8TCG3,Q969Q2,Q9NQH8 Gamma-tropomyosin, Tropomyosin-3, Tropomyosin-5	actin cytoskeleton, actin filament, cytoskeleton, cytosol, extracellular exosome, muscle thin filament tropomyosin, stress fiber	tropomyosin family	http://zinc.docking.org/results/combination?filter.purchasability=purchasable&annotation.name=TPM3_HUMAN	http://cansar.icr.ac.uk/cansar/molecular-targets/P06753/				1	0	1	0	0	0	0	-3	59	1	1	0	0	1	0	0
	B5ME19	EIF3CL	Eukaryotic translation initiation factor 3 subunit C-like protein		EIFCL_HUMAN, EIF3CL	Cytoplasm	B5ME19 EIFCL_HUMAN Eukaryotic translation initiation factor 3 subunit C-like protein B5ME19	eukaryotic 43s preinitiation complex, eukaryotic 48s preinitiation complex, eukaryotic translation initiation factor 3 complex	eIF-3 subunit C family	http://zinc.docking.org/results/combination?filter.purchasability=purchasable&annotation.name=EIFCL_HUMAN	http://cansar.icr.ac.uk/cansar/molecular-targets/B5ME19/				2	0	2	2	100	2	100	-3	59
	P24821	TNC	Tenascin		TENA_HUMAN, TNC, HXB	Secreted, Extracellular space, Extracellular matrix	P24821 TENA_HUMAN Tenascin P24821,C9IYT7,C9J575,C9J6D9,C9J848,Q14583,Q15567,Q5T7S3 Cytotactin, GMEM, GP 150-225, Glioma-associated-extracellular matrix antigen, Hexabrachion, JI, Myotendinous antigen, Neuronectin, Tenascin-C HXB	basement membrane, collagen-containing extracellular matrix, endoplasmic reticulum lumen, extracellular region, extracellular space, focal adhesion, interstitial matrix, membrane, perisynaptic extracellular matrix	tenascin family	http://zinc.docking.org/results/combination?filter.purchasability=purchasable&annotation.name=TENA_HUMAN	http://cansar.icr.ac.uk/cansar/molecular-targets/P24821/				5	0	5	0	0	1	20	-1.05	68
	Q15041	ARL6IP1	ADP-ribosylation factor-like protein 6-interacting protein 1		AR6P1_HUMAN, ARL6IP1, ARL6IP, ARMER, KIAA0069	Endomembrane system, Endoplasmic reticulum membrane, Endoplasmic reticulum	Q15041 AR6P1_HUMAN ADP-ribosylation factor-like protein 6-interacting protein 1 Q15041,B7Z6S5,B7Z791,F5GXP4 Apoptotic regulator in the membrane of the endoplasmic reticulum ARL6IP, ARMER, KIAA0069	cytosol, endoplasmic reticulum membrane, integral component of endoplasmic reticulum membrane, integral component of membrane, membrane, sec61 translocon complex	ARL6ip family	http://zinc.docking.org/results/combination?filter.purchasability=purchasable&annotation.name=AR6P1_HUMAN	http://cansar.icr.ac.uk/cansar/molecular-targets/Q15041/				0	0	0	0	0	0	0	-3	59
	Q05682	CALD1	Caldesmon		CALD1_HUMAN, CALD1, CAD, CDM	Cytoplasm, Cytoskeleton, Cytoplasm, Myofibril, Cytoplasm, Cytoskeleton, Stress fiber	Q05682 CALD1_HUMAN Caldesmon Q05682,A8K0X1,Q13978,Q13979,Q14741,Q14742,Q9UD91 CAD, CDM	actin cap, actin cytoskeleton, cytoskeleton, cytosol, myofibril, plasma membrane	caldesmon family	http://zinc.docking.org/results/combination?filter.purchasability=purchasable&annotation.name=CALD1_HUMAN	http://cansar.icr.ac.uk/cansar/molecular-targets/Q05682/				0	0	0	0	0	0	0	-3	59
	Q16553	LY6E	Lymphocyte antigen 6E		LY6E_HUMAN, LY6E, 9804, RIGE, SCA2, TSA1	Cell membrane	Q16553 LY6E_HUMAN Lymphocyte antigen 6E Q16553,B2R4X5,D3DWJ2,Q0VDE5 Retinoic acid-induced gene E protein, Stem cell antigen 2, Thymic shared antigen 1 9804, RIGE, SCA2, TSA1	anchored component of membrane, extracellular region, membrane, plasma membrane		http://zinc.docking.org/results/combination?filter.purchasability=purchasable&annotation.name=LY6E_HUMAN	http://cansar.icr.ac.uk/cansar/molecular-targets/Q16553/				0	0	0	0	0	0	0	-3	59
	O60216	RAD21	Double-strand-break repair protein rad21 homolog		RAD21_HUMAN, RAD21, HR21, KIAA0078, NXP1, SCC1	Nucleus, Nucleus matrix, Chromosome, Chromosome, Centromere, Cytoplasm, Cytoskeleton, Spindle pole, Cytoplasm, Cytosol, Nucleus	O60216 RAD21_HUMAN Double-strand-break repair protein rad21 homolog O60216,A8K0E0,Q15001,Q99568 Nuclear matrix protein 1, SCC1 homolog HR21, KIAA0078, NXP1, SCC1	chromatin, chromosome, chromosome, cohesin complex, cytosol, meiotic cohesin complex, membrane, nuclear cohesin complex, nuclear matrix, nucleoplasm, spindle pole	rad21 family	http://zinc.docking.org/results/combination?filter.purchasability=purchasable&annotation.name=RAD21_HUMAN	http://cansar.icr.ac.uk/cansar/molecular-targets/O60216/				8	0	6	2	34	5	84	-3	59
	Q9BUP0	EFHD1	EF-hand domain-containing protein D1		EFHD1_HUMAN, EFHD1, SWS2	Mitochondrion inner membrane	Q9BUP0 EFHD1_HUMAN EF-hand domain-containing protein D1 Q9BUP0,B2RD83,E9PFH3,Q9BTF8,Q9H8I2,Q9HBQ0 EF-hand domain-containing protein 1, Swiprosin-2 SWS2	mitochondrial inner membrane, mitochondrion		http://zinc.docking.org/results/combination?filter.purchasability=purchasable&annotation.name=EFHD1_HUMAN	http://cansar.icr.ac.uk/cansar/molecular-targets/Q9BUP0/				0	0	0	0	0	0	0	-1.55	63
	P35222	CTNNB1	Catenin beta-1		CTNB1_HUMAN, CTNNB1, CTNNB	Cytoplasm, Nucleus, Cytoplasm, Cytoskeleton, Cell junction, Adherens junction, Cell junction, Cell membrane, Cytoplasm, Cytoskeleton, Microtubule organizing center, Centrosome, Cytoplasm, Cytoskeleton, Spindle pole, Cell junction, Synapse, Cytoplasm, Cytoskeleton, Cilium basal body	P35222 CTNB1_HUMAN Catenin beta-1 P35222,A8K1L7,Q8NEW9,Q8NI94,Q9H391 Beta-catenin CTNNB	adherens junction, apical part of cell, basolateral plasma membrane, beta-catenin destruction complex, beta-catenin-tcf complex, beta-catenin-tcf7l2 complex, bicellular tight junction, catenin complex, cell cortex, cell junction, cell periphery, cell-cell junction, centrosome, cytoplasm, cytosol, extracellular exosome, fascia adherens, flotillin complex, focal adhesion, lamellipodium, lateral pla…	beta-catenin family	http://zinc.docking.org/results/combination?filter.purchasability=purchasable&annotation.name=CTNB1_HUMAN	http://cansar.icr.ac.uk/cansar/molecular-targets/P35222/				42	0	29	20	69	28	97	-3	59	1	444	1	0	180	1	0
	P26038	MSN	Moesin		MOES_HUMAN, MSN	Cell membrane, Cytoplasm, Cytoskeleton, Apical cell membrane, Cell projection, Microvillus membrane, Cell projection, Microvillus	P26038 MOES_HUMAN Moesin P26038 Membrane-organizing extension spike protein	apical part of cell, apical plasma membrane, basolateral plasma membrane, blood microparticle, cell periphery, cell surface, cytoplasm, cytoskeleton, cytosol, extracellular exosome, extracellular space, filopodium, focal adhesion, invadopodium, microvillus, microvillus membrane, nucleus, perinuclear region of cytoplasm, plasma membrane, pseudopodium, uropod, vesicle		http://zinc.docking.org/results/combination?filter.purchasability=purchasable&annotation.name=MOES_HUMAN	http://cansar.icr.ac.uk/cansar/molecular-targets/P26038/				3	0	3	2	67	3	100	0	80	1	1	0	0	1	0	0
	Q12797	ASPH	Aspartyl/asparaginyl beta-hydroxylase	1.14.11.16	ASPH_HUMAN, ASPH, BAH	Endoplasmic reticulum membrane, Sarcoplasmic reticulum membrane, Endoplasmic reticulum membrane	Q12797 ASPH_HUMAN Aspartyl/asparaginyl beta-hydroxylase Q12797,A0A0A0MSK8,A6NDF4,A6NHI2,B4DIC9,B4E2K4,B7ZM95,E5RGP5,F5H667,Q6NXR7,Q8TB28,Q9H291,Q9H2C4,Q9NRI0,Q9NRI1,Q9Y4J0 Aspartate beta-hydroxylase, Peptide-aspartate beta-dioxygenase BAH	calcium channel complex, cortical endoplasmic reticulum, endoplasmic reticulum, endoplasmic reticulum membrane, integral component of endoplasmic reticulum membrane, integral component of membrane, junctional sarcoplasmic reticulum membrane, plasma membrane, sarcoplasmic reticulum lumen, sarcoplasmic reticulum membrane	aspartyl/asparaginyl beta-hydroxylase family	http://zinc.docking.org/results/combination?filter.purchasability=purchasable&annotation.name=ASPH_HUMAN	http://cansar.icr.ac.uk/cansar/molecular-targets/Q12797/				11	9	11	7	64	11	100	-3	59
	P53621	COPA	Coatomer subunit alpha		COPA_HUMAN, COPA	Cytoplasm, Golgi apparatus membrane, Cytoplasmic vesicle, COPI-coated vesicle membrane, Secreted	P53621 COPA_HUMAN Coatomer subunit alpha P53621,Q5T201,Q8IXZ9 Alpha-coat protein, HEP-COP	copi vesicle coat, cytoplasm, cytosol, endoplasmic reticulum membrane, extracellular exosome, extracellular space, golgi membrane, growth cone, membrane, transport vesicle		http://zinc.docking.org/results/combination?filter.purchasability=purchasable&annotation.name=COPA_HUMAN	http://cansar.icr.ac.uk/cansar/molecular-targets/P53621/				3	1	3	1	34	3	100	-3	59
	P49368	CCT3	T-complex protein 1 subunit gamma		TCPG_HUMAN, CCT3, CCTG, TRIC5	Cytoplasm	P49368 TCPG_HUMAN T-complex protein 1 subunit gamma P49368,A6NE14,Q5SZY1,Q9BR64 CCT-gamma, hTRiC5 CCTG, TRIC5	cell body, chaperonin-containing t-complex, cytoskeleton, cytosol, extracellular exosome, microtubule, plasma membrane, zona pellucida receptor complex	TCP-1 chaperonin family	http://zinc.docking.org/results/combination?filter.purchasability=purchasable&annotation.name=TCPG_HUMAN	http://cansar.icr.ac.uk/cansar/molecular-targets/P49368/				7	0	7	7	100	7	100	-3	59
	P14923	JUP	Junction plakoglobin		PLAK_HUMAN, JUP, CTNNG, DP3	Cell junction, Adherens junction, Cell junction, Desmosome, Cytoplasm, Cytoskeleton, Membrane	P14923 PLAK_HUMAN Junction plakoglobin P14923,Q15093,Q15151,Q7L3S5,Q86W21,Q9BWC4,Q9HCX9 Catenin gamma, Desmoplakin III, Desmoplakin-3 CTNNG, DP3	actin cytoskeleton, adherens junction, apicolateral plasma membrane, catenin complex, cell-cell junction, cornified envelope, cytoplasm, cytoplasmic side of plasma membrane, cytoskeleton, cytosol, desmosome, extracellular exosome, extracellular region, fascia adherens, ficolin-1-rich granule lumen, focal adhesion, gamma-catenin-tcf7l2 complex, intercalated disc, intermediate filament, lateral pla…	beta-catenin family	http://zinc.docking.org/results/combination?filter.purchasability=purchasable&annotation.name=PLAK_HUMAN	http://cansar.icr.ac.uk/cansar/molecular-targets/P14923/				1	0	1	1	100	1	100	-3	59
	P55268	LAMB2	Laminin subunit beta-2		LAMB2_HUMAN, LAMB2, LAMS	Secreted, Extracellular space, Extracellular matrix, Basement membrane	P55268 LAMB2_HUMAN Laminin subunit beta-2 P55268,Q16321 Laminin B1s chain, Laminin-11 subunit beta, Laminin-14 subunit beta, Laminin-15 subunit beta, Laminin-3 subunit beta, Laminin-4 subunit beta, Laminin-7 subunit beta, Laminin-9 subunit beta, S-laminin subunit beta LAMS	basement membrane, collagen-containing extracellular matrix, endoplasmic reticulum lumen, extracellular exosome, extracellular region, laminin complex, laminin-11 complex, laminin-3 complex, neuromuscular junction, synaptic cleft		http://zinc.docking.org/results/combination?filter.purchasability=purchasable&annotation.name=LAMB2_HUMAN	http://cansar.icr.ac.uk/cansar/molecular-targets/P55268/				0	0	0	0	0	0	0	-3	59
	Q9H1E3	NUCKS1	Nuclear ubiquitous casein and cyclin-dependent kinase substrate 1		NUCKS_HUMAN, NUCKS1, NUCKS	Nucleus	Q9H1E3 NUCKS_HUMAN Nuclear ubiquitous casein and cyclin-dependent kinase substrate 1 Q9H1E3,Q54AC0,Q5PXE7,Q9H1D6,Q9H723 P1 NUCKS	chromatin, cytoplasm, nuclear chromatin, nucleolus, nucleoplasm, nucleus		http://zinc.docking.org/results/combination?filter.purchasability=purchasable&annotation.name=NUCKS_HUMAN	http://cansar.icr.ac.uk/cansar/molecular-targets/Q9H1E3/				0	0	0	0	0	0	0	-3	59
	Q8IWU6	SULF1	Extracellular sulfatase Sulf-1	3.1.6.-	SULF1_HUMAN, SULF1, KIAA1077	Endoplasmic reticulum, Golgi apparatus, Golgi stack, Cell surface	Q8IWU6 SULF1_HUMAN Extracellular sulfatase Sulf-1 Q8IWU6,Q86YV8,Q8NCA2,Q9UPS5 KIAA1077	cell surface, endoplasmic reticulum, extracellular space, golgi apparatus, golgi stack, membrane raft, plasma membrane	sulfatase family	http://zinc.docking.org/results/combination?filter.purchasability=purchasable&annotation.name=SULF1_HUMAN	http://cansar.icr.ac.uk/cansar/molecular-targets/Q8IWU6/				0	0	0	0	0	0	0	-3	59
	O95857	TSPAN13	Tetraspanin-13		TSN13_HUMAN, TSPAN13, NET6, TM4SF13	Membrane	O95857 TSN13_HUMAN Tetraspanin-13 O95857 Tetraspan NET-6, Transmembrane 4 superfamily member 13 NET6, TM4SF13	integral component of plasma membrane, membrane	tetraspanin (TM4SF) family	http://zinc.docking.org/results/combination?filter.purchasability=purchasable&annotation.name=TSN13_HUMAN	http://cansar.icr.ac.uk/cansar/molecular-targets/O95857/				0	0	0	0	0	0	0	-3	59
	P20036	HLA-DPA1	HLA class II histocompatibility antigen, DP alpha 1 chain		DPA1_HUMAN, HLA-DPA1, HLA-DP1A, HLASB	Cell membrane, Endoplasmic reticulum membrane, Golgi apparatus, Trans-Golgi network membrane, Endosome membrane, Lysosome membrane	P20036 DPA1_HUMAN HLA class II histocompatibility antigen, DP alpha 1 chain P20036,A9YWH7,B9UKH4,O19722,O46883,P01905,P79554,Q2Q060,Q2Q061,Q5EY03,Q5STP1,Q6DQK4,Q9BCQ1,Q9TPX3,Q9XS10 DP(W3), DP(W4), HLA-SB alpha chain, MHC class II DP3-alpha, MHC class II DPA1 HLA-DP1A, HLASB	cell surface, clathrin-coated endocytic vesicle membrane, endocytic vesicle membrane, endosome membrane, er to golgi transport vesicle membrane, golgi membrane, integral component of lumenal side of endoplasmic reticulum membrane, integral component of plasma membrane, intracellular membrane-bounded organelle, lysosomal membrane, mhc class ii protein complex, plasma membrane, trans-golgi network …	MHC class II family	http://zinc.docking.org/results/combination?filter.purchasability=purchasable&annotation.name=DPA1_HUMAN	http://cansar.icr.ac.uk/cansar/molecular-targets/P20036/				6	5	6	1	17	6	100	0	80
	P15311	EZR	Ezrin		EZRI_HUMAN, EZR, VIL2	Apical cell membrane, Cell projection, Cell projection, Microvillus membrane, Cell projection, Ruffle membrane, Cytoplasm, Cell cortex, Cytoplasm, Cytoskeleton, Cell projection, Microvillus	P15311 EZRI_HUMAN Ezrin P15311,E1P5A8,P23714,Q4VX75,Q96CU8,Q9NSJ4 Cytovillin, Villin-2, p81 VIL2	actin cytoskeleton, actin filament, apical part of cell, apical plasma membrane, astrocyte projection, basolateral plasma membrane, brush border, cell body, cell periphery, cell projection, cell tip, ciliary basal body, cortical cytoskeleton, cytoplasm, cytoplasmic side of apical plasma membrane, cytosol, endosome, extracellular exosome, extracellular space, extrinsic component of membrane, fibri…		http://zinc.docking.org/results/combination?filter.purchasability=purchasable&annotation.name=EZRI_HUMAN	http://cansar.icr.ac.uk/cansar/molecular-targets/P15311/				4	0	4	3	75	4	100	-3	59	1	18	0	0	8	0	0
	Q969X5	ERGIC1	Endoplasmic reticulum-Golgi intermediate compartment protein 1		ERGI1_HUMAN, ERGIC1, ERGIC32, KIAA1181	Endoplasmic reticulum membrane, Endoplasmic reticulum-Golgi intermediate compartment membrane, Golgi apparatus membrane	Q969X5 ERGI1_HUMAN Endoplasmic reticulum-Golgi intermediate compartment protein 1 Q969X5,Q9H0L0,Q9H2J2,Q9ULN9 ER-Golgi intermediate compartment 32 kDa protein ERGIC32, KIAA1181	copii-coated er to golgi transport vesicle, endoplasmic reticulum, endoplasmic reticulum-golgi intermediate compartment, endoplasmic reticulum-golgi intermediate compartment membrane, integral component of endoplasmic reticulum membrane, integral component of golgi membrane, intracellular membrane-bounded organelle, membrane, nucleoplasm	ERGIC family	http://zinc.docking.org/results/combination?filter.purchasability=purchasable&annotation.name=ERGI1_HUMAN	http://cansar.icr.ac.uk/cansar/molecular-targets/Q969X5/				0	0	0	0	0	0	0	-1.3	65
	P40424	PBX1	Pre-B-cell leukemia transcription factor 1		PBX1_HUMAN, PBX1, PRL	Nucleus	P40424 PBX1_HUMAN Pre-B-cell leukemia transcription factor 1 P40424,B4DSC1,F5H4U9,Q5T488 Homeobox protein PBX1, Homeobox protein PRL PRL	cytoplasm, nuclear chromatin, nucleoplasm, nucleus, rna polymerase ii transcription regulator complex	TALE/PBX homeobox family	http://zinc.docking.org/results/combination?filter.purchasability=purchasable&annotation.name=PBX1_HUMAN	http://cansar.icr.ac.uk/cansar/molecular-targets/P40424/				2	0	2	0	0	2	100	-3	59
	P49006	MARCKSL1	MARCKS-related protein		MRP_HUMAN, MARCKSL1, MLP, MRP	Cytoplasm, Cytoskeleton, Cell membrane	P49006 MRP_HUMAN MARCKS-related protein P49006,D3DPQ0,Q5TEE6,Q6NXS5 MARCKS-like protein 1, Macrophage myristoylated alanine-rich C kinase substrate MLP, MRP	cytoplasm, cytoskeleton, extracellular exosome, plasma membrane	MARCKS family	http://zinc.docking.org/results/combination?filter.purchasability=purchasable&annotation.name=MRP_HUMAN	http://cansar.icr.ac.uk/cansar/molecular-targets/P49006/				0	0	0	0	0	0	0	-3	59
	P04844	RPN2	Dolichyl-diphosphooligosaccharide--protein glycosyltransferase subunit 2		RPN2_HUMAN, RPN2	Endoplasmic reticulum, Endoplasmic reticulum membrane	P04844 RPN2_HUMAN Dolichyl-diphosphooligosaccharide--protein glycosyltransferase subunit 2 P04844,Q5JYR6,Q6IBA5,Q96E21,Q9BUQ3,Q9UBE1 Dolichyl-diphosphooligosaccharide--protein glycosyltransferase 63 kDa subunit, RIBIIR, Ribophorin II, Ribophorin-2	autophagosome membrane, endoplasmic reticulum membrane, integral component of membrane, membrane, oligosaccharyltransferase complex, rough endoplasmic reticulum	SWP1 family	http://zinc.docking.org/results/combination?filter.purchasability=purchasable&annotation.name=RPN2_HUMAN	http://cansar.icr.ac.uk/cansar/molecular-targets/P04844/				2	2	2	0	0	2	100	-3	59
	P62979	RPS27A	Ubiquitin-40S ribosomal protein S27a		RS27A_HUMAN, RPS27A, UBA80, UBCEP1	Cytoplasm, Nucleus	P62979 RS27A_HUMAN Ubiquitin-40S ribosomal protein S27a P62979,P02248,P02249,P02250,P14798,P62988,Q29120,Q6LBL4,Q6LDU5,Q8WYN8,Q91887,Q91888,Q9BQ77,Q9BWD6,Q9BX98,Q9UEF2,Q9UEG1,Q9UEK8,Q9UPK7 Ubiquitin carboxyl extension protein 80 UBA80, UBCEP1	cytoplasm, cytosol, cytosolic small ribosomal subunit, endocytic vesicle membrane, endoplasmic reticulum membrane, endosome membrane, extracellular exosome, extracellular space, host cell, membrane, mitochondrial outer membrane, nucleolus, nucleoplasm, nucleus, plasma membrane, small ribosomal subunit, vesicle		http://zinc.docking.org/results/combination?filter.purchasability=purchasable&annotation.name=RS27A_HUMAN	http://cansar.icr.ac.uk/cansar/molecular-targets/P62979/				97	2	94	14	15	52	56	1	90
	P84101	SERF2	Small EDRK-rich factor 2		SERF2_HUMAN, SERF2, FAM2C		P84101 SERF2_HUMAN Small EDRK-rich factor 2 P84101,A6NL45,B5MCG1,B9A026,O75918,O88891,Q9BZH7 Gastric cancer-related protein VRG107, Protein 4F5-related FAM2C	cytosol, nucleus	SERF family	http://zinc.docking.org/results/combination?filter.purchasability=purchasable&annotation.name=SERF2_HUMAN	http://cansar.icr.ac.uk/cansar/molecular-targets/P84101/				0	0	0	0	0	0	0	-3	59
	Q9Y3U8	RPL36	60S ribosomal protein L36		RL36_HUMAN, RPL36	Cytoplasm, Cytosol, Cytoplasm	Q9Y3U8 RL36_HUMAN 60S ribosomal protein L36 Q9Y3U8,B2R4Y1,D6W634,Q6FIG1,Q9UQF6 Large ribosomal subunit protein eL36	cytoplasm, cytosol, cytosolic large ribosomal subunit, membrane, nucleolus, polysomal ribosome	eukaryotic ribosomal protein eL36 family	http://zinc.docking.org/results/combination?filter.purchasability=purchasable&annotation.name=RL36_HUMAN	http://cansar.icr.ac.uk/cansar/molecular-targets/Q9Y3U8/				0	0	0	0	0	0	0	-3	59
	P62851	RPS25	40S ribosomal protein S25		RS25_HUMAN, RPS25		P62851 RS25_HUMAN 40S ribosomal protein S25 P62851,B2R4M7,P25111 Small ribosomal subunit protein eS25	cytosol, cytosolic small ribosomal subunit, extracellular exosome, nucleolus, nucleoplasm, nucleus, postsynaptic density, ribosome, small ribosomal subunit	eukaryotic ribosomal protein eS25 family	http://zinc.docking.org/results/combination?filter.purchasability=purchasable&annotation.name=RS25_HUMAN	http://cansar.icr.ac.uk/cansar/molecular-targets/P62851/				26	0	26	8	31	16	62	-3	59
	P16471	PRLR	Prolactin receptor		PRLR_HUMAN, PRLR	Membrane, Secreted	P16471 PRLR_HUMAN Prolactin receptor P16471,B2R882,D1MDP1,Q16354,Q8TD75,Q8TD78,Q96P35,Q96P36,Q9BX87,Q9UHJ5	cell surface, endosome lumen, external side of plasma membrane, extracellular region, integral component of membrane, plasma membrane, receptor complex	type I cytokine receptor family	http://zinc.docking.org/results/combination?filter.purchasability=purchasable&annotation.name=PRLR_HUMAN	http://cansar.icr.ac.uk/cansar/molecular-targets/P16471/	25.70|Q99062|CSF3R|Pegfilgrastim,Lipegfilgrastim,Filgrastim|Whole:::Protein			12	0	12	0	0	7	59	-3	59	1	3	0	0	2	0	0
	P63010	AP2B1	AP-2 complex subunit beta		AP2B1_HUMAN, AP2B1, ADTB2, CLAPB1	Cell membrane, Membrane, Coated pit	P63010 AP2B1_HUMAN AP-2 complex subunit beta P63010,A6NJP3,P21851,Q7Z451,Q96J19 AP105B, Adaptor protein complex AP-2 subunit beta, Adaptor-related protein complex 2 subunit beta, Beta-2-adaptin, Beta-adaptin, Clathrin assembly protein complex 2 beta large chain, Plasma membrane adaptor HA2/AP2 adaptin beta subunit ADTB2, CLAPB1	ap-2 adaptor complex, clathrin adaptor complex, clathrin-coated endocytic vesicle, clathrin-coated endocytic vesicle membrane, cytosol, endocytic vesicle membrane, endolysosome membrane, glutamatergic synapse, membrane, plasma membrane, postsynapse, presynapse	adaptor complexes large subunit family	http://zinc.docking.org/results/combination?filter.purchasability=purchasable&annotation.name=AP2B1_HUMAN	http://cansar.icr.ac.uk/cansar/molecular-targets/P63010/				23	1	22	7	32	20	91	-3	59
	P61353	RPL27	60S ribosomal protein L27		RL27_HUMAN, RPL27	Cytoplasm, Cytosol, Cytoplasm, Rough endoplasmic reticulum	P61353 RL27_HUMAN 60S ribosomal protein L27 P61353,P08526,Q4G0A9 Large ribosomal subunit protein eL27	cytoplasmic side of rough endoplasmic reticulum membrane, cytosol, cytosolic large ribosomal subunit, extracellular exosome, focal adhesion, membrane, nucleus, ribonucleoprotein complex, ribosome	eukaryotic ribosomal protein eL27 family	http://zinc.docking.org/results/combination?filter.purchasability=purchasable&annotation.name=RL27_HUMAN	http://cansar.icr.ac.uk/cansar/molecular-targets/P61353/				0	0	0	0	0	0	0	-3	59
	P78543	BTG2	Protein BTG2		BTG2_HUMAN, BTG2, PC3		P78543 BTG2_HUMAN Protein BTG2 P78543,A0A024R986,Q3KR25,Q5VUT0 BTG family member 2, NGF-inducible anti-proliferative protein PC3 PC3	cytoplasm, cytosol, extracellular exosome, nucleus	BTG family	http://zinc.docking.org/results/combination?filter.purchasability=purchasable&annotation.name=BTG2_HUMAN	http://cansar.icr.ac.uk/cansar/molecular-targets/P78543/				2	0	2	0	0	2	100	-3	59
	P60033	CD81	CD81 antigen		CD81_HUMAN, CD81, TAPA1, TSPAN28	Cell membrane, Basolateral cell membrane	P60033 CD81_HUMAN CD81 antigen P60033,P18582,Q5U0J6 26 kDa cell surface protein TAPA-1, Target of the antiproliferative antibody 1, Tetraspanin-28 TAPA1, TSPAN28	basolateral plasma membrane, extracellular exosome, focal adhesion, immunological synapse, integral component of membrane, integral component of plasma membrane, membrane, plasma membrane, tetraspanin-enriched microdomain, vesicle	tetraspanin (TM4SF) family	http://zinc.docking.org/results/combination?filter.purchasability=purchasable&annotation.name=CD81_HUMAN	http://cansar.icr.ac.uk/cansar/molecular-targets/P60033/				15	1	15	2	14	8	54	-0.95	69	1	7	1	0	5	1	0
	Q92743	HTRA1	Serine protease HTRA1	3.4.21.-	HTRA1_HUMAN, HTRA1, HTRA, PRSS11	Cell membrane, Secreted, Cytoplasm, Cytosol	Q92743 HTRA1_HUMAN Serine protease HTRA1 Q92743,D3DRE4,Q9UNS5 High-temperature requirement A serine peptidase 1, L56, Serine protease 11 HTRA, PRSS11	collagen-containing extracellular matrix, cytosol, extracellular exosome, extracellular region, extracellular space, plasma membrane	peptidase S1C family	http://zinc.docking.org/results/combination?filter.purchasability=purchasable&annotation.name=HTRA1_HUMAN	http://cansar.icr.ac.uk/cansar/molecular-targets/Q92743/				8	0	8	3	38	8	100	-1.9	59
	Q9NYQ6	CELSR1	Cadherin EGF LAG seven-pass G-type receptor 1		CELR1_HUMAN, CELSR1, CDHF9, FMI2	Cell membrane	Q9NYQ6 CELR1_HUMAN Cadherin EGF LAG seven-pass G-type receptor 1 Q9NYQ6,O95722,Q5TH47,Q9BWQ5,Q9Y506,Q9Y526 Cadherin family member 9, Flamingo homolog 2 CDHF9, FMI2	integral component of membrane, nucleoplasm, plasma membrane	G-protein coupled receptor 2 family	http://zinc.docking.org/results/combination?filter.purchasability=purchasable&annotation.name=CELR1_HUMAN	http://cansar.icr.ac.uk/cansar/molecular-targets/Q9NYQ6/				0	0	0	0	0	0	0	1.2	92
	P21926	CD9	CD9 antigen		CD9_HUMAN, CD9, MIC3, TSPAN29	Cell membrane, Membrane, Secreted, Extracellular exosome	P21926 CD9_HUMAN CD9 antigen P21926,D3DUQ9,Q5J7W6,Q96ES4 5H9 antigen, Cell growth-inhibiting gene 2 protein, Leukocyte antigen MIC3, Motility-related protein, Tetraspanin-29, p24 MIC3, TSPAN29	apical plasma membrane, clathrin-coated endocytic vesicle membrane, endocytic vesicle membrane, external side of plasma membrane, extracellular exosome, extracellular space, extracellular vesicle, focal adhesion, integral component of plasma membrane, membrane, plasma membrane, platelet alpha granule membrane, protein-containing complex	tetraspanin (TM4SF) family	http://zinc.docking.org/results/combination?filter.purchasability=purchasable&annotation.name=CD9_HUMAN	http://cansar.icr.ac.uk/cansar/molecular-targets/P21926/				1	1	1	0	0	1	100	-3	59
	P0DP24	CALM2	Calmodulin-2		CALM2_HUMAN, CALM2, CAM2, CAMB	Cytoplasm, Cytoskeleton, Spindle, Cytoplasm, Cytoskeleton, Spindle pole, Cytoplasm, Cytoskeleton, Microtubule organizing center, Centrosome	P0DP24 CALM2_HUMAN Calmodulin-2 P0DP24,P02593,P62158,P70667,P99014,Q13942,Q53S29,Q61379,Q61380,Q96HK3 CAM2, CAMB	calcium channel complex, catalytic complex, centrosome, cytoplasm, nucleus, plasma membrane, protein-containing complex, sarcomere, spindle microtubule, spindle pole, vesicle	calmodulin family	http://zinc.docking.org/results/combination?filter.purchasability=purchasable&annotation.name=CALM2_HUMAN	http://cansar.icr.ac.uk/cansar/molecular-targets/P0DP24/	50.99|P63316|TNNC1|Bepridil Hydrochloride,Bepridil|Whole:::Protein	50.99|P63316|TNNC1|Bepridil Hydrochloride,Bepridil|Whole:::Protein	50.99|P63316|TNNC1|Bepridil Hydrochloride,Bepridil|Whole:::Protein	105	12	105	39	38	102	98			1	54	5	0	32	5	0
	P17844	DDX5	Probable ATP-dependent RNA helicase DDX5	3.6.4.13	DDX5_HUMAN, DDX5, G17P1, HELR, HLR1	Nucleus, Nucleus, Nucleolus, Cytoplasm	P17844 DDX5_HUMAN Probable ATP-dependent RNA helicase DDX5 P17844,B4DLW8,B5BU21,D3DU32,E7ETL9,O75681,Q53Y61 DEAD box protein 5, RNA helicase p68 G17P1, HELR, HLR1	catalytic step 2 spliceosome, cytoplasm, extracellular exosome, membrane, nucleolus, nucleoplasm, nucleus, ribonucleoprotein complex	DEAD box helicase family	http://zinc.docking.org/results/combination?filter.purchasability=purchasable&annotation.name=DDX5_HUMAN	http://cansar.icr.ac.uk/cansar/molecular-targets/P17844/				2	1	2	0	0	2	100	1.05	91	1	1	0	0	1	0	0
	P18146	EGR1	Early growth response protein 1		EGR1_HUMAN, EGR1, KROX24, ZNF225	Nucleus, Cytoplasm	P18146 EGR1_HUMAN Early growth response protein 1 P18146 AT225, Nerve growth factor-induced protein A, Transcription factor ETR103, Transcription factor Zif268, Zinc finger protein 225, Zinc finger protein Krox-24 KROX24, ZNF225	cytoplasm, nuclear chromatin, nucleoplasm, nucleus	EGR C2H2-type zinc-finger protein family	http://zinc.docking.org/results/combination?filter.purchasability=purchasable&annotation.name=EGR1_HUMAN	http://cansar.icr.ac.uk/cansar/molecular-targets/P18146/				9	1	8	0	0	3	38	-3	59	1	1	0	0	1	0	0
	Q07820	MCL1	Induced myeloid leukemia cell differentiation protein Mcl-1		MCL1_HUMAN, MCL1, BCL2L3	Membrane, Cytoplasm, Mitochondrion, Nucleus, Nucleoplasm	Q07820 MCL1_HUMAN Induced myeloid leukemia cell differentiation protein Mcl-1 Q07820,B2R6B2,D3DV03,D3DV04,Q9HD91,Q9NRQ3,Q9NRQ4,Q9UHR7,Q9UHR8,Q9UHR9,Q9UNJ1 Bcl-2-like protein 3, Bcl-2-related protein EAT/mcl1, mcl1/EAT BCL2L3	bcl-2 family protein complex, cytoplasm, cytosol, integral component of membrane, membrane, mitochondrial outer membrane, mitochondrion, nucleoplasm, nucleus	Bcl-2 family	http://zinc.docking.org/results/combination?filter.purchasability=purchasable&annotation.name=MCL1_HUMAN	http://cansar.icr.ac.uk/cansar/molecular-targets/Q07820/				100	70	98	28	29	95	97	0.15	81	1	1036	109	4	445	70	3
	P05090	APOD	Apolipoprotein D		APOD_HUMAN, APOD	Secreted	P05090 APOD_HUMAN Apolipoprotein D P05090,B2R579,D3DNW6,Q6IBG6	cytoplasm, cytosolic ribosome, dendrite, endoplasmic reticulum, extracellular exosome, extracellular region, extracellular space, neuronal cell body, perinuclear region of cytoplasm	Lipocalin family	http://zinc.docking.org/results/combination?filter.purchasability=purchasable&annotation.name=APOD_HUMAN	http://cansar.icr.ac.uk/cansar/molecular-targets/P05090/				2	1	2	1	50	2	100	-3	59
	P09382	LGALS1	Galectin-1		LEG1_HUMAN, LGALS1	Secreted, Extracellular space, Extracellular matrix	P09382 LEG1_HUMAN Galectin-1 P09382,B2R5E8,Q9UDK5 14 kDa laminin-binding protein, 14 kDa lectin, Beta-galactoside-binding lectin L-14-I, Galaptin, HBL, HPL, Lactose-binding lectin 1, Lectin galactoside-binding soluble 1, Putative MAPK-activating protein PM12, S-Lac lectin 1	cell surface, collagen-containing extracellular matrix, cytoplasm, cytosol, endoplasmic reticulum lumen, extracellular exosome, extracellular region, extracellular space, intracellular, nucleus		http://zinc.docking.org/results/combination?filter.purchasability=purchasable&annotation.name=LEG1_HUMAN	http://cansar.icr.ac.uk/cansar/molecular-targets/P09382/				31	10	31	1	4	10	33	-1.95	59	1	173	5	0	100	2	0
	Q13501	SQSTM1	Sequestosome-1		SQSTM_HUMAN, SQSTM1, ORCA, OSIL	Cytoplasm, Cytosol, Late endosome, Lysosome, Cytoplasmic vesicle, Autophagosome, Nucleus, Endoplasmic reticulum, Nucleus, PML body, Cytoplasm, Myofibril, Sarcomere	Q13501 SQSTM_HUMAN Sequestosome-1 Q13501,A6NFN7,B2R661,B3KUW5,Q13446,Q9BUV7,Q9BVS6,Q9UEU1 EBI3-associated protein of 60 kDa, Phosphotyrosine-independent ligand for the Lck SH2 domain of 62 kDa, Ubiquitin-binding protein p62 ORCA, OSIL	aggresome, amphisome, autolysosome, autophagosome, cytoplasm, cytosol, endoplasmic reticulum, extracellular exosome, inclusion body, intracellular membrane-bounded organelle, late endosome, lewy body, mitochondrion, nucleoplasm, p-body, phagophore assembly site, pml body, sarcomere, sperm midpiece		http://zinc.docking.org/results/combination?filter.purchasability=purchasable&annotation.name=SQSTM_HUMAN	http://cansar.icr.ac.uk/cansar/molecular-targets/Q13501/				23	1	23	1	5	12	53	-0.75	71
	P49207	RPL34	60S ribosomal protein L34		RL34_HUMAN, RPL34	Cytoplasm, Cytosol, Cytoplasm, Endoplasmic reticulum	P49207 RL34_HUMAN 60S ribosomal protein L34 P49207,Q6FG66,Q9BUZ2 Large ribosomal subunit protein eL34	cytosol, cytosolic large ribosomal subunit, endoplasmic reticulum, extracellular exosome	eukaryotic ribosomal protein eL34 family	http://zinc.docking.org/results/combination?filter.purchasability=purchasable&annotation.name=RL34_HUMAN	http://cansar.icr.ac.uk/cansar/molecular-targets/P49207/				0	0	0	0	0	0	0	-3	59
	P55327	TPD52	Tumor protein D52		TPD52_HUMAN, TPD52		P55327 TPD52_HUMAN Tumor protein D52 P55327,B7Z414,C9J502,D0UFD1,D0UFD2,D0UFD3,D0UFD4,D0UFD5,E5RKB4,Q13056,Q53EK8,Q6FGP3,Q6FGS3,Q86YZ2,Q9UCX8 Protein N8	cytoplasm, endoplasmic reticulum, perinuclear region of cytoplasm	TPD52 family	http://zinc.docking.org/results/combination?filter.purchasability=purchasable&annotation.name=TPD52_HUMAN	http://cansar.icr.ac.uk/cansar/molecular-targets/P55327/				0	0	0	0	0	0	0	-3	59
	P46940	IQGAP1	Ras GTPase-activating-like protein IQGAP1		IQGA1_HUMAN, IQGAP1, KIAA0051	Cell membrane, Nucleus, Cytoplasm	P46940 IQGA1_HUMAN Ras GTPase-activating-like protein IQGAP1 P46940,A7MBM3 p195 KIAA0051	actin filament, axon, cytoplasm, cytoplasmic ribonucleoprotein granule, cytosol, extracellular exosome, extrinsic component of cytoplasmic side of plasma membrane, focal adhesion, growth cone, lateral plasma membrane, membrane raft, microtubule, midbody, neuron projection, nucleus, plasma membrane, ribonucleoprotein complex, ruffle, secretory granule membrane, slit diaphragm		http://zinc.docking.org/results/combination?filter.purchasability=purchasable&annotation.name=IQGA1_HUMAN	http://cansar.icr.ac.uk/cansar/molecular-targets/P46940/				5	1	5	0	0	5	100	-3	59	1	1	0	0	1	0	0
	P09493	TPM1	Tropomyosin alpha-1 chain		TPM1_HUMAN, TPM1, C15orf13, TMSA	Cytoplasm, Cytoskeleton	P09493 TPM1_HUMAN Tropomyosin alpha-1 chain P09493,B7Z5T7,D9YZV2,D9YZV3,D9YZV8,P09494,P10469,Q6DV89,Q6DV90,Q7Z6L8,Q86W64,Q96IK2,Q9UCI1,Q9UCI2,Q9UCY9,Q9Y427 Alpha-tropomyosin, Tropomyosin-1 C15orf13, TMSA	actin cytoskeleton, actin filament, bleb, cytoskeleton, cytosol, muscle thin filament tropomyosin, ruffle membrane, sarcomere, stress fiber	tropomyosin family	http://zinc.docking.org/results/combination?filter.purchasability=purchasable&annotation.name=TPM1_HUMAN	http://cansar.icr.ac.uk/cansar/molecular-targets/P09493/				5	0	5	0	0	0	0	-3	59
	Q9HCY8	S100A14	Protein S100-A14		S10AE_HUMAN, S100A14, S100A15	Cytoplasm	Q9HCY8 S10AE_HUMAN Protein S100-A14 Q9HCY8,Q5RHT0 S100 calcium-binding protein A14 S100A15	extracellular exosome, perinuclear region of cytoplasm	S-100 family	http://zinc.docking.org/results/combination?filter.purchasability=purchasable&annotation.name=S10AE_HUMAN	http://cansar.icr.ac.uk/cansar/molecular-targets/Q9HCY8/				1	0	1	0	0	1	100	-3	59
	P83731	RPL24	60S ribosomal protein L24		RL24_HUMAN, RPL24		P83731 RL24_HUMAN 60S ribosomal protein L24 P83731,B2R4Y3,P38663,Q6IBS3 60S ribosomal protein L30, Large ribosomal subunit protein eL24	cytoplasm, cytosol, cytosolic large ribosomal subunit, endoplasmic reticulum, extracellular exosome, membrane, polysomal ribosome	eukaryotic ribosomal protein eL24 family	http://zinc.docking.org/results/combination?filter.purchasability=purchasable&annotation.name=RL24_HUMAN	http://cansar.icr.ac.uk/cansar/molecular-targets/P83731/				1	0	1	0	0	0	0	-3	59
	P10809	HSPD1	60 kDa heat shock protein, mitochondrial	5.6.1.7	CH60_HUMAN, HSPD1, HSP60	Mitochondrion matrix	P10809 CH60_HUMAN 60 kDa heat shock protein, mitochondrial P10809,B2R5M6,B7Z712,Q38L19,Q9UCR6 60 kDa chaperonin, Chaperonin 60, Heat shock protein 60, HuCHA60, Mitochondrial matrix protein P1, P60 lymphocyte protein HSP60	cell surface, clathrin-coated pit, coated vesicle, cytoplasm, cytosol, early endosome, extracellular exosome, extracellular space, golgi apparatus, lipopolysaccharide receptor complex, membrane, membrane raft, mitochondrial crista, mitochondrial inner membrane, mitochondrial matrix, mitochondrion, peroxisomal matrix, plasma membrane, protein-containing complex, rough endoplasmic reticulum, secret…	chaperonin (HSP60) family	http://zinc.docking.org/results/combination?filter.purchasability=purchasable&annotation.name=CH60_HUMAN	http://cansar.icr.ac.uk/cansar/molecular-targets/P10809/				3	3	3	3	100	3	100	-3	59	1	147	0	0	55	0	0
	P60842	EIF4A1	Eukaryotic initiation factor 4A-I	3.6.4.13	IF4A1_HUMAN, EIF4A1, DDX2A, EIF4A		P60842 IF4A1_HUMAN Eukaryotic initiation factor 4A-I P60842,B2R6L8,D3DTP9,J3QLC4,P04765,Q5U018,Q61516 ATP-dependent RNA helicase eIF4A-1 DDX2A, EIF4A	cytoplasm, cytosol, eukaryotic translation initiation factor 4f complex, extracellular exosome, membrane	DEAD box helicase family	http://zinc.docking.org/results/combination?filter.purchasability=purchasable&annotation.name=IF4A1_HUMAN	http://cansar.icr.ac.uk/cansar/molecular-targets/P60842/				5	3	4	2	50	4	100	-0.65	72	1	65	26	8	21	3	1
	Q8NBJ4	GOLM1	Golgi membrane protein 1		GOLM1_HUMAN, GOLM1, C9orf155, GOLPH2	Golgi apparatus, Cis-Golgi network membrane	Q8NBJ4 GOLM1_HUMAN Golgi membrane protein 1 Q8NBJ4,Q6IAF4,Q9NRB9 Golgi membrane protein GP73, Golgi phosphoprotein 2 C9orf155, GOLPH2	endoplasmic reticulum lumen, extracellular space, golgi apparatus, integral component of plasma membrane	GOLM family	http://zinc.docking.org/results/combination?filter.purchasability=purchasable&annotation.name=GOLM1_HUMAN	http://cansar.icr.ac.uk/cansar/molecular-targets/Q8NBJ4/				0	0	0	0	0	0	0	0.55	85
	Q14847	LASP1	LIM and SH3 domain protein 1		LASP1_HUMAN, LASP1, MLN50	Cytoplasm, Cell cortex, Cytoplasm, Cytoskeleton	Q14847 LASP1_HUMAN LIM and SH3 domain protein 1 Q14847,B4DGQ0,Q96ED2,Q96IG0 Metastatic lymph node gene 50 protein MLN50	cortical actin cytoskeleton, cytoplasm, focal adhesion		http://zinc.docking.org/results/combination?filter.purchasability=purchasable&annotation.name=LASP1_HUMAN	http://cansar.icr.ac.uk/cansar/molecular-targets/Q14847/				2	0	2	0	0	0	0	0.75	88
	P51858	HDGF	Hepatoma-derived growth factor		HDGF_HUMAN, HDGF, HMG1L2	Nucleus, Cytoplasm, Secreted, Extracellular exosome, Nucleus, Cytoplasm, Secreted, Extracellular exosome, Nucleus, Cytoplasm, Secreted, Extracellular exosome	P51858 HDGF_HUMAN Hepatoma-derived growth factor P51858,B3KU21,D3DVC9,Q5SZ07,Q5SZ08,Q5SZ09 High mobility group protein 1-like 2 HMG1L2	collagen-containing extracellular matrix, cytoplasm, extracellular region, extracellular space, nucleoplasm, nucleus, transcription repressor complex	HDGF family	http://zinc.docking.org/results/combination?filter.purchasability=purchasable&annotation.name=HDGF_HUMAN	http://cansar.icr.ac.uk/cansar/molecular-targets/P51858/				4	0	4	2	50	3	75	-3	59
	P36956	SREBF1	Sterol regulatory element-binding protein 1		SRBP1_HUMAN, SREBF1, BHLHD1, SREBP1	Endoplasmic reticulum membrane, Golgi apparatus membrane, Cytoplasmic vesicle, COPII-coated vesicle membrane, Nucleus, Nucleus, Nucleus	P36956 SRBP1_HUMAN Sterol regulatory element-binding protein 1 P36956,B0I4X3,B0I4X4,D3DXC4,Q16062,Q59F52,Q6P4R7,Q6PFW7,Q6PJ36,Q8TAK9 Class D basic helix-loop-helix protein 1, Sterol regulatory element-binding transcription factor 1 BHLHD1, SREBP1	cytoplasm, cytosol, endoplasmic reticulum, endoplasmic reticulum membrane, er to golgi transport vesicle membrane, golgi membrane, integral component of membrane, nuclear chromatin, nuclear envelope, nucleoplasm, nucleus, protein-containing complex	SREBP family	http://zinc.docking.org/results/combination?filter.purchasability=purchasable&annotation.name=SRBP1_HUMAN	http://cansar.icr.ac.uk/cansar/molecular-targets/P36956/				1	0	1	0	0	0	0	-3	59
	P24844	MYL9	Myosin regulatory light polypeptide 9		MYL9_HUMAN, MYL9, MLC2, MRLC1, MYRL2		P24844 MYL9_HUMAN Myosin regulatory light polypeptide 9 P24844,E1P5T6,Q9BQL9,Q9BUF9,Q9H136 20 kDa myosin light chain, MLC-2C, Myosin RLC, Myosin regulatory light chain 2, smooth muscle isoform, Myosin regulatory light chain 9, Myosin regulatory light chain MRLC1 MLC2, MRLC1, MYRL2	cytosol, muscle myosin complex, stress fiber, z disc		http://zinc.docking.org/results/combination?filter.purchasability=purchasable&annotation.name=MYL9_HUMAN	http://cansar.icr.ac.uk/cansar/molecular-targets/P24844/				0	0	0	0	0	0	0	-1	68
	P00558	PGK1	Phosphoglycerate kinase 1	2.7.2.3	PGK1_HUMAN, PGK1, PGKA	Cytoplasm	P00558 PGK1_HUMAN Phosphoglycerate kinase 1 P00558,A8K4W6,B7Z7A9,Q5J7W1,Q6IBT6,Q8NI87 Cell migration-inducing gene 10 protein, Primer recognition protein 2 PGKA	cytosol, extracellular exosome, extracellular space, membrane, membrane raft	phosphoglycerate kinase family	http://zinc.docking.org/results/combination?filter.purchasability=purchasable&annotation.name=PGK1_HUMAN	http://cansar.icr.ac.uk/cansar/molecular-targets/P00558/				25	25	25	18	72	25	100	-1.1	67	1	345	12	11	79	6	5
	P50914	RPL14	60S ribosomal protein L14		RL14_HUMAN, RPL14		P50914 RL14_HUMAN 60S ribosomal protein L14 P50914,Q45RF0,Q53G20,Q8TBD5,Q8WUT0,Q92579,Q96GR0,Q9BSB8,Q9BW65,Q9BYF6 CAG-ISL 7, Large ribosomal subunit protein eL14	cytosol, cytosolic large ribosomal subunit, extracellular exosome, membrane, postsynaptic density	eukaryotic ribosomal protein eL14 family	http://zinc.docking.org/results/combination?filter.purchasability=purchasable&annotation.name=RL14_HUMAN	http://cansar.icr.ac.uk/cansar/molecular-targets/P50914/				0	0	0	0	0	0	0	-3	59
	P06748	NPM1	Nucleophosmin		NPM_HUMAN, NPM1, NPM	Nucleus, Nucleolus, Nucleus, Nucleoplasm, Cytoplasm, Cytoskeleton, Microtubule organizing center, Centrosome	P06748 NPM_HUMAN Nucleophosmin P06748,A8K3N7,B5BU00,D3DQL6,P08693,Q12826,Q13440,Q13441,Q14115,Q5EU94,Q5EU95,Q5EU96,Q5EU97,Q5EU98,Q5EU99,Q6V962,Q8WTW5,Q96AT6,Q96DC4,Q96EA5,Q9BYG9,Q9UDJ7 Nucleolar phosphoprotein B23, Nucleolar protein NO38, Numatrin NPM	centrosome, cytoplasm, cytosol, focal adhesion, membrane, nucleolus, nucleoplasm, nucleus, protein-containing complex, protein-dna complex, ribonucleoprotein complex, spindle pole centrosome	nucleoplasmin family	http://zinc.docking.org/results/combination?filter.purchasability=purchasable&annotation.name=NPM_HUMAN	http://cansar.icr.ac.uk/cansar/molecular-targets/P06748/				5	0	5	0	0	2	40	-0.35	75	1	74	5	0	35	4	0
	P23588	EIF4B	Eukaryotic translation initiation factor 4B		IF4B_HUMAN, EIF4B		P23588 IF4B_HUMAN Eukaryotic translation initiation factor 4B P23588,B4DS13,Q4G0E3,Q53HQ2,Q6GPH5,Q6IB46,Q8WYK5	cytosol, eukaryotic translation initiation factor 4f complex, polysome		http://zinc.docking.org/results/combination?filter.purchasability=purchasable&annotation.name=IF4B_HUMAN	http://cansar.icr.ac.uk/cansar/molecular-targets/P23588/				2	0	2	0	0	2	100	-3	59	1	1	0	0	1	0	0
	P62258	YWHAE	14-3-3 protein epsilon		1433E_HUMAN, YWHAE	Nucleus, Cytoplasm, Melanosome	P62258 1433E_HUMAN 14-3-3 protein epsilon P62258,B3KY71,D3DTH5,P29360,P42655,Q4VJB6,Q53XZ5,Q63631,Q7M4R4	central region of growth cone, cytoplasm, cytosol, extracellular exosome, focal adhesion, glutamatergic synapse, kinesin complex, melanosome, membrane, mitochondrion, nucleus	14-3-3 family	http://zinc.docking.org/results/combination?filter.purchasability=purchasable&annotation.name=1433E_HUMAN	http://cansar.icr.ac.uk/cansar/molecular-targets/P62258/				4	0	4	2	50	4	100	-3	59	1	5	0	0	4	0	0
	Q08345	DDR1	Epithelial discoidin domain-containing receptor 1	2.7.10.1	DDR1_HUMAN, DDR1, CAK, EDDR1, NEP, NTRK4, PTK3A, RTK6, TRKE	Cell membrane, Cell membrane, Secreted, Cell membrane	Q08345 DDR1_HUMAN Epithelial discoidin domain-containing receptor 1 Q08345,B5A975,B5A976,B7Z2K0,Q14196,Q16562,Q2L6H3,Q4LE50,Q5ST11,Q5ST12,Q6NSK4,Q9UD35,Q9UD36,Q9UD37,Q9UD86,Q9UDL2 CD167 antigen-like family member A, Cell adhesion kinase, Discoidin receptor tyrosine kinase, HGK2, Mammary carcinoma kinase 10, Protein-tyrosine kinase 3A, Protein-tyrosine kinase RTK-6, TRK E, Tyrosine kinase DDR, Tyr…	extracellular exosome, extracellular space, integral component of plasma membrane, plasma membrane, receptor complex	Tyr protein kinase family	http://zinc.docking.org/results/combination?filter.purchasability=purchasable&annotation.name=DDR1_HUMAN	http://cansar.icr.ac.uk/cansar/molecular-targets/Q08345/	100.00|Q08345|DDR1|Nilotinib Hydrochloride Monohydrate,Nilotinib|Whole:::Protein	100.00|Q08345|DDR1|Nilotinib Hydrochloride Monohydrate,Nilotinib|Whole:::Protein||66.28|Q16832|DDR2|Regorafenib|Whole:::Protein||50.33|Q16832|DDR2|Regorafenib|Whole:::Protein	100.00|Q08345|DDR1|Nilotinib Hydrochloride Monohydrate,Nilotinib|Whole:::Protein||66.28|Q16832|DDR2|Regorafenib|Whole:::Protein||50.33|Q16832|DDR2|Regorafenib|Whole:::Protein||46.03|Q16620|NTRK2|Larotrectinib Sulfate,Larotrectinib,Entrectinib|Whole:::Protein||44.26|P04629|NTRK1|Larotrectinib Sulfate,Larotrectinib,Entrectinib,Cenegermin|Whole:::Protein||43.13|Q16288|NTRK3|Larotrectinib Sulfate,Lar…	20	19	20	20	100	20	100	0.7	87	1	1253	440	64	491	106	26
	P01100	FOS	Proto-oncogene c-Fos		FOS_HUMAN, FOS, G0S7	Nucleus, Endoplasmic reticulum, Cytoplasm, Cytosol	P01100 FOS_HUMAN Proto-oncogene c-Fos P01100,A8K4E2,B4DQ65,P18849 Cellular oncogene fos, G0/G1 switch regulatory protein 7 G0S7	cytosol, endoplasmic reticulum, membrane, neuron projection, nuclear chromatin, nucleoplasm, nucleus, protein-dna complex, transcription factor ap-1 complex	bZIP family	http://zinc.docking.org/results/combination?filter.purchasability=purchasable&annotation.name=FOS_HUMAN	http://cansar.icr.ac.uk/cansar/molecular-targets/P01100/				4	0	4	0	0	0	0	-0.45	74	1	84	3	3	33	3	3
	P19338	NCL	Nucleolin		NUCL_HUMAN, NCL	Nucleus, Nucleolus, Cytoplasm	P19338 NUCL_HUMAN Nucleolin P19338,Q53SK1,Q8NB06,Q9UCF0,Q9UDG1 Protein C23	cell cortex, cytoplasmic ribonucleoprotein granule, extracellular exosome, membrane, nucleolus, nucleoplasm, nucleus, ribonucleoprotein complex, spliceosomal complex		http://zinc.docking.org/results/combination?filter.purchasability=purchasable&annotation.name=NUCL_HUMAN	http://cansar.icr.ac.uk/cansar/molecular-targets/P19338/				3	0	3	1	34	3	100	-3	59
	P27105	STOM	Erythrocyte band 7 integral membrane protein		STOM_HUMAN, STOM, BND7, EPB72	Cell membrane, Cytoplasm, Cytoskeleton, Cell membrane, Membrane raft, Melanosome, Cytoplasmic vesicle	P27105 STOM_HUMAN Erythrocyte band 7 integral membrane protein P27105,B1AM77,Q14087,Q15609,Q5VX96,Q96FK4 Protein 7.2b, Stomatin BND7, EPB72	azurophil granule membrane, blood microparticle, cytoskeleton, endoplasmic reticulum, extracellular exosome, extracellular space, integral component of plasma membrane, melanosome, membrane, membrane raft, mitochondrion, perinuclear region of cytoplasm, plasma membrane, specific granule membrane, tertiary granule membrane, vesicle	band 7/mec-2 family	http://zinc.docking.org/results/combination?filter.purchasability=purchasable&annotation.name=STOM_HUMAN	http://cansar.icr.ac.uk/cansar/molecular-targets/P27105/				0	0	0	0	0	0	0	-3	59
	P15529	CD46	Membrane cofactor protein		MCP_HUMAN, CD46, MCP, MIC10	Cytoplasmic vesicle, Secretory vesicle, Acrosome inner membrane	P15529 MCP_HUMAN Membrane cofactor protein P15529,A0T1T0,A0T1T1,A0T1T2,Q15429,Q53GV9,Q5HY94,Q5VWS6,Q5VWS7,Q5VWS8,Q5VWS9,Q5VWT0,Q5VWT1,Q5VWT2,Q6N0A1,Q7Z3R5,Q9NNW2,Q9NNW3,Q9NNW4,Q9UCJ4 TLX, Trophoblast leukocyte common antigen MCP, MIC10	cell surface, extracellular exosome, focal adhesion, inner acrosomal membrane, integral component of plasma membrane, plasma membrane		http://zinc.docking.org/results/combination?filter.purchasability=purchasable&annotation.name=MCP_HUMAN	http://cansar.icr.ac.uk/cansar/molecular-targets/P15529/				6	2	6	1	17	4	67	-3	59
	P02649	APOE	Apolipoprotein E		APOE_HUMAN, APOE	Secreted, Secreted, Extracellular space, Secreted, Extracellular space, Extracellular matrix	P02649 APOE_HUMAN Apolipoprotein E P02649,B2RC15,C0JYY5,Q9P2S4	blood microparticle, chylomicron, clathrin-coated endocytic vesicle membrane, collagen-containing extracellular matrix, cytoplasm, dendrite, discoidal high-density lipoprotein particle, early endosome, endocytic vesicle lumen, endoplasmic reticulum, endoplasmic reticulum lumen, extracellular exosome, extracellular matrix, extracellular region, extracellular space, extracellular vesicle, glutamate…	apolipoprotein A1/A4/E family	http://zinc.docking.org/results/combination?filter.purchasability=purchasable&annotation.name=APOE_HUMAN	http://cansar.icr.ac.uk/cansar/molecular-targets/P02649/				21	2	19	0	0	7	37	-3	59
	P20962	PTMS	Parathymosin		PTMS_HUMAN, PTMS		P20962 PTMS_HUMAN Parathymosin P20962	nucleus	pro/parathymosin family	http://zinc.docking.org/results/combination?filter.purchasability=purchasable&annotation.name=PTMS_HUMAN	http://cansar.icr.ac.uk/cansar/molecular-targets/P20962/				0	0	0	0	0	0	0	-3	59
	Q71U36	TUBA1A	Tubulin alpha-1A chain		TBA1A_HUMAN, TUBA1A, TUBA3	Cytoplasm, Cytoskeleton	Q71U36 TBA1A_HUMAN Tubulin alpha-1A chain Q71U36,A8K0B8,G3V1U9,P04687,P05209 Alpha-tubulin 3, Tubulin B-alpha-1, Tubulin alpha-3 chain TUBA3	cytoplasm, cytoplasmic microtubule, cytoplasmic ribonucleoprotein granule, cytosol, extracellular exosome, membrane raft, microtubule, microtubule cytoskeleton, myelin sheath, neuromuscular junction, nucleus, recycling endosome	tubulin family	http://zinc.docking.org/results/combination?filter.purchasability=purchasable&annotation.name=TBA1A_HUMAN	http://cansar.icr.ac.uk/cansar/molecular-targets/Q71U36/	100.00|Q71U36|TUBA1A|Vinflunine,Vindesine Sulfate,Vindesine,Docetaxel,Docetaxel|Whole:::Protein	100.00|Q71U36|TUBA1A|Vinflunine,Vindesine Sulfate,Vindesine,Docetaxel,Docetaxel|Whole:::Protein||99.54|P68363|TUBA1B|Docetaxel,Docetaxel|Whole:::Protein||99.31|Q9BQE3|TUBA1C|Docetaxel,Docetaxel|Whole:::Protein||97.22|Q6PEY2|TUBA3E|Docetaxel,Docetaxel|Whole:::Protein||97.22|P68366|TUBA4A|Docetaxel,Docetaxel,Colchicine|Whole:::Protein	100.00|Q71U36|TUBA1A|Vinflunine,Vindesine Sulfate,Vindesine,Docetaxel,Docetaxel|Whole:::Protein||99.54|P68363|TUBA1B|Docetaxel,Docetaxel|Whole:::Protein||99.31|Q9BQE3|TUBA1C|Docetaxel,Docetaxel|Whole:::Protein||97.22|Q6PEY2|TUBA3E|Docetaxel,Docetaxel|Whole:::Protein||97.22|P68366|TUBA4A|Docetaxel,Docetaxel,Colchicine|Whole:::Protein||42.17|P21148|TBB|Thiabendazole,Albendazole|Whole:::Protein||42.…	13	12	12	5	42	12	100	0.7	87	1	1755	16	12	710	14	10
	P01033	TIMP1	Metalloproteinase inhibitor 1		TIMP1_HUMAN, TIMP1, CLGI, TIMP	Secreted	P01033 TIMP1_HUMAN Metalloproteinase inhibitor 1 P01033,Q14252,Q9UCU1 Erythroid-potentiating activity, Fibroblast collagenase inhibitor, Tissue inhibitor of metalloproteinases 1 CLGI, TIMP	basement membrane, endoplasmic reticulum lumen, extracellular exosome, extracellular matrix, extracellular region, extracellular space, platelet alpha granule lumen	protease inhibitor I35 (TIMP) family	http://zinc.docking.org/results/combination?filter.purchasability=purchasable&annotation.name=TIMP1_HUMAN	http://cansar.icr.ac.uk/cansar/molecular-targets/P01033/				8	0	8	1	13	8	100	-3	59
	P01911	HLA-DRB1	HLA class II histocompatibility antigen, DRB1 beta chain		DRB_HUMAN, HLA-DRB1	Cell membrane, Endoplasmic reticulum membrane, Golgi apparatus, Trans-Golgi network membrane, Endosome membrane, Lysosome membrane, Late endosome membrane	P01911 DRB_HUMAN HLA class II histocompatibility antigen, DRB1 beta chain P01911,A0MWF2,A0N0W1,A2ICT1,A2TGX3,A4F5N0,A4ZXA5,A4ZXA6,A4ZY86,A5H000,A5HKN8,A7DZP9,A7LA26,A7UHG2,A7X5B1,A7X5B7,A7X5E0,A7X5E6,A7X5H8,A7X5J4,A7X5K7,A8K098,A8YQE9,A9JPG0,B0BK85,B0LUZ6,B0UYW1,B1GWE7,B2CR03,B2LVF9,B2NJ29,B2ZCY1,B3VTP8,B3VTQ3,B5A8Y2,B5A8Y3,B5B8U0,B5B9V5,B5B9V6,B5LZ25,B5QSK8,B6VCX2,B6VEL9,B7UDB2,B9VRA4,B9X248,C0L…	cell surface, clathrin-coated endocytic vesicle membrane, endocytic vesicle membrane, er to golgi transport vesicle membrane, external side of plasma membrane, extracellular exosome, extracellular space, golgi membrane, integral component of lumenal side of endoplasmic reticulum membrane, integral component of plasma membrane, intermediate filament, late endosome membrane, lysosomal membrane, mem…		http://zinc.docking.org/results/combination?filter.purchasability=purchasable&annotation.name=DRB_HUMAN	http://cansar.icr.ac.uk/cansar/molecular-targets/P01911/				89	20	89	0	0	12	14	-0.25	77
	Q15149	PLEC	Plectin		PLEC_HUMAN, PLEC, PLEC1	Cytoplasm, Cytoskeleton, Cell junction, Hemidesmosome	Q15149 PLEC_HUMAN Plectin Q15149,Q15148,Q16640,Q6S376,Q6S377,Q6S378,Q6S379,Q6S380,Q6S381,Q6S382,Q6S383 Hemidesmosomal protein 1, Plectin-1 PLEC1	brush border, costamere, cytoplasm, cytosol, extracellular exosome, focal adhesion, hemidesmosome, intermediate filament cytoskeleton, membrane, perinuclear region of cytoplasm, plasma membrane, sarcolemma, sarcoplasm	plakin or cytolinker family	http://zinc.docking.org/results/combination?filter.purchasability=purchasable&annotation.name=PLEC_HUMAN	http://cansar.icr.ac.uk/cansar/molecular-targets/Q15149/				14	0	14	3	22	11	79	-1.2	66	1	1	0	0	1	0	0
	Q13510	ASAH1	Acid ceramidase	3.5.1.23	ASAH1_HUMAN, ASAH1, ASAH	Lysosome, Secreted, Nucleus, Cytoplasm	Q13510 ASAH1_HUMAN Acid ceramidase Q13510,E9PDS0,Q6W898,Q96AS2 Acylsphingosine deacylase, N-acylethanolamine hydrolase ASAH1, N-acylsphingosine amidohydrolase, Putative 32 kDa heart protein ASAH	extracellular exosome, extracellular region, extracellular space, ficolin-1-rich granule lumen, lysosomal lumen, lysosome, nucleus, tertiary granule lumen	acid ceramidase family	http://zinc.docking.org/results/combination?filter.purchasability=purchasable&annotation.name=ASAH1_HUMAN	http://cansar.icr.ac.uk/cansar/molecular-targets/Q13510/				2	2	1	1	100	1	100	-3	59	1	155	54	51	63	25	23
	P01034	CST3	Cystatin-C		CYTC_HUMAN, CST3	Secreted	P01034 CYTC_HUMAN Cystatin-C P01034,B2R5J9,D3DW42,Q6FGW9 Cystatin-3, Gamma-trace, Neuroendocrine basic polypeptide, Post-gamma-globulin	axon, basement membrane, contractile fiber, endoplasmic reticulum, endoplasmic reticulum lumen, extracellular exosome, extracellular region, extracellular space, ficolin-1-rich granule lumen, golgi apparatus, lysosome, multivesicular body, neuronal cell body, nuclear membrane, perinuclear region of cytoplasm, plasma membrane, tertiary granule lumen	cystatin family	http://zinc.docking.org/results/combination?filter.purchasability=purchasable&annotation.name=CYTC_HUMAN	http://cansar.icr.ac.uk/cansar/molecular-targets/P01034/				11	0	11	1	10	9	82	-3	59
	Q969L2	MAL2	Protein MAL2		MAL2_HUMAN, MAL2	Cell membrane, Apical cell membrane, Endomembrane system, Cytoplasm, Perinuclear region	Q969L2 MAL2_HUMAN Protein MAL2 Q969L2,B2R520,Q6ZMD9	apical plasma membrane, endomembrane system, extracellular exosome, integral component of membrane, membrane raft, perinuclear region of cytoplasm	MAL family	http://zinc.docking.org/results/combination?filter.purchasability=purchasable&annotation.name=MAL2_HUMAN	http://cansar.icr.ac.uk/cansar/molecular-targets/Q969L2/				0	0	0	0	0	0	0	-3	59
	Q04721	NOTCH2	Neurogenic locus notch homolog protein 2		NOTC2_HUMAN, NOTCH2	Cell membrane, Nucleus, Cytoplasm	Q04721 NOTC2_HUMAN Neurogenic locus notch homolog protein 2 Q04721,Q5T3X7,Q99734,Q9H240	cell surface, cilium, endoplasmic reticulum membrane, extracellular region, golgi membrane, integral component of plasma membrane, membrane, nucleoplasm, nucleus, plasma membrane, receptor complex	NOTCH family	http://zinc.docking.org/results/combination?filter.purchasability=purchasable&annotation.name=NOTC2_HUMAN	http://cansar.icr.ac.uk/cansar/molecular-targets/Q04721/				2	1	2	1	50	1	50	1.4	94	1	1	1	0	1	1	0
	P23284	PPIB	Peptidyl-prolyl cis-trans isomerase B	5.2.1.8	PPIB_HUMAN, PPIB, CYPB	Endoplasmic reticulum lumen, Melanosome	P23284 PPIB_HUMAN Peptidyl-prolyl cis-trans isomerase B P23284,A8K534,Q6IBH5,Q9BVK5 CYP-S1, Cyclophilin B, Rotamase B, S-cyclophilin CYPB	cytoplasm, endoplasmic reticulum, endoplasmic reticulum chaperone complex, endoplasmic reticulum lumen, extracellular exosome, focal adhesion, intracellular membrane-bounded organelle, melanosome, membrane, nucleoplasm, nucleus, perinuclear region of cytoplasm, protein-containing complex, smooth endoplasmic reticulum	cyclophilin-type PPIase family	http://zinc.docking.org/results/combination?filter.purchasability=purchasable&annotation.name=PPIB_HUMAN	http://cansar.icr.ac.uk/cansar/molecular-targets/P23284/				3	1	3	0	0	1	34	-0.95	69	1	149	121	0	66	53	0
	P00736	C1R	Complement C1r subcomponent	3.4.21.41	C1R_HUMAN, C1R	Secreted	P00736 C1R_HUMAN Complement C1r subcomponent P00736,A6NJQ8,Q68D77,Q8J012 Complement component 1 subcomponent r	blood microparticle, extracellular exosome, extracellular region, extracellular space	peptidase S1 family	http://zinc.docking.org/results/combination?filter.purchasability=purchasable&annotation.name=C1R_HUMAN	http://cansar.icr.ac.uk/cansar/molecular-targets/P00736/	36.65|P00742|F10|Rivaroxaban,Fondaparinux Sodium,Fondaparinux,EMICIZUMAB-KXWH,Apixaban,Antithrombin Alfa|Whole:::Protein		36.65|P00742|F10|Rivaroxaban,Fondaparinux Sodium,Fondaparinux,EMICIZUMAB-KXWH,Apixaban,Antithrombin Alfa|Whole:::Protein	9	5	9	1	12	7	78	1	90	1	118	0	0	30	0	0
	P13164	IFITM1	Interferon-induced transmembrane protein 1		IFM1_HUMAN, IFITM1, CD225, IFI17	Cell membrane	P13164 IFM1_HUMAN Interferon-induced transmembrane protein 1 P13164,Q15322,Q53XZ0 Dispanin subfamily A member 2a, Interferon-induced protein 17, Interferon-inducible protein 9-27, Leu-13 antigen CD225, IFI17	integral component of membrane, membrane, plasma membrane, protein-containing complex	CD225/Dispanin family	http://zinc.docking.org/results/combination?filter.purchasability=purchasable&annotation.name=IFM1_HUMAN	http://cansar.icr.ac.uk/cansar/molecular-targets/P13164/				0	0	0	0	0	0	0	-3	59
	Q8NCL4	GALNT6	Polypeptide N-acetylgalactosaminyltransferase 6	2.4.1.41	GALT6_HUMAN, GALNT6	Golgi apparatus membrane	Q8NCL4 GALT6_HUMAN Polypeptide N-acetylgalactosaminyltransferase 6 Q8NCL4,Q8IYH4,Q9H6G2,Q9UIV5 Polypeptide GalNAc transferase 6, Protein-UDP acetylgalactosaminyltransferase 6, UDP-GalNAc:polypeptide N-acetylgalactosaminyltransferase 6	golgi apparatus, golgi membrane, integral component of membrane, perinuclear region of cytoplasm	glycosyltransferase 2 family	http://zinc.docking.org/results/combination?filter.purchasability=purchasable&annotation.name=GALT6_HUMAN	http://cansar.icr.ac.uk/cansar/molecular-targets/Q8NCL4/				0	0	0	0	0	0	0	-3	59
	P23142	FBLN1	Fibulin-1		FBLN1_HUMAN, FBLN1	Secreted, Extracellular space, Extracellular matrix	P23142 FBLN1_HUMAN Fibulin-1 P23142,B0QY42,B1AHL4,P23143,P23144,P37888,Q5TIC4,Q8TBH8,Q9HBQ5,Q9UC21,Q9UGR4,Q9UH41	basement membrane, collagen-containing extracellular matrix, elastic fiber, extracellular exosome, extracellular matrix, extracellular region, extracellular space	fibulin family	http://zinc.docking.org/results/combination?filter.purchasability=purchasable&annotation.name=FBLN1_HUMAN	http://cansar.icr.ac.uk/cansar/molecular-targets/P23142/				0	0	0	0	0	0	0	1.15	92
	Q96FX8	PERP	p53 apoptosis effector related to PMP-22		PERP_HUMAN, PERP, KCP1, KRTCAP1, PIGPC1, THW	Cell junction, Desmosome, Cell membrane	Q96FX8 PERP_HUMAN p53 apoptosis effector related to PMP-22 Q96FX8,B2RB73,E1P590,Q8IWS3,Q8N1J6,Q8NC16,Q9H1C5,Q9H230 Keratinocyte-associated protein 1, P53-induced protein PIGPC1, Transmembrane protein THW KCP1, KRTCAP1, PIGPC1, THW	cell junction, desmosome, golgi apparatus, integral component of plasma membrane, mitochondrion, plasma membrane	TMEM47 family	http://zinc.docking.org/results/combination?filter.purchasability=purchasable&annotation.name=PERP_HUMAN	http://cansar.icr.ac.uk/cansar/molecular-targets/Q96FX8/				0	0	0	0	0	0	0	-3	59
	Q14956	GPNMB	Transmembrane glycoprotein NMB		GPNMB_HUMAN, GPNMB, HGFIN, NMB	Cell membrane, Melanosome membrane, Early endosome membrane	Q14956 GPNMB_HUMAN Transmembrane glycoprotein NMB Q14956,A4D155,Q6UVX1,Q8N1A1 Hematopoietic growth factor inducible neurokinin-1 type HGFIN, NMB	early endosome membrane, integral component of membrane, integral component of plasma membrane, melanosome membrane, plasma membrane	PMEL/NMB family	http://zinc.docking.org/results/combination?filter.purchasability=purchasable&annotation.name=GPNMB_HUMAN	http://cansar.icr.ac.uk/cansar/molecular-targets/Q14956/				0	0	0	0	0	0	0	-3	59
	P08069	IGF1R	Insulin-like growth factor 1 receptor	2.7.10.1	IGF1R_HUMAN, IGF1R	Cell membrane	P08069 IGF1R_HUMAN Insulin-like growth factor 1 receptor P08069,B1B5Y2,Q14CV2,Q9UCC0 Insulin-like growth factor I receptor	alphav-beta3 integrin-igf-1-igf1r complex, axon, insulin receptor complex, integral component of plasma membrane, intracellular membrane-bounded organelle, membrane, plasma membrane, protein kinase complex, receptor complex	Tyr protein kinase family	http://zinc.docking.org/results/combination?filter.purchasability=purchasable&annotation.name=IGF1R_HUMAN	http://cansar.icr.ac.uk/cansar/molecular-targets/P08069/	100.00|P08069|IGF1R|Somatropin,Mecasermin Rinfabate,Mecasermin Rinfabate,Mecasermin,Brigatinib|Whole:::Protein	100.00|P08069|IGF1R|Somatropin,Mecasermin Rinfabate,Mecasermin Rinfabate,Mecasermin,Brigatinib|Whole:::Protein	100.00|P08069|IGF1R|Somatropin,Mecasermin Rinfabate,Mecasermin Rinfabate,Mecasermin,Brigatinib|Whole:::Protein||49.82|P08922|ROS1|Lorlatinib,Entrectinib,Brigatinib|Whole:::Protein||43.97|Q9UM73|ALK|Lorlatinib,Entrectinib,Crizotinib,Ceritinib,Brigatinib,Alectinib Hydrochloride,Alectinib|Whole:::Protein||43.94|Q16620|NTRK2|Larotrectinib Sulfate,Larotrectinib,Entrectinib|Whole:::Protein||42.61|P0051…	30	25	29	20	69	29	100	1.15	92	1	4505	1108	504	2144	427	213
	P31431	SDC4	Syndecan-4		SDC4_HUMAN, SDC4	Membrane, Secreted, Secreted	P31431 SDC4_HUMAN Syndecan-4 P31431,O00773,Q16833,Q53FN9,Q6FGN3 Amphiglycan, Ryudocan core protein	cell surface, costamere, extracellular exosome, focal adhesion, golgi lumen, integral component of plasma membrane, lysosomal lumen, membrane raft, plasma membrane	syndecan proteoglycan family	http://zinc.docking.org/results/combination?filter.purchasability=purchasable&annotation.name=SDC4_HUMAN	http://cansar.icr.ac.uk/cansar/molecular-targets/P31431/				4	0	0	0	0	0	0	-3	59
	Q9UPN3	MACF1	Microtubule-actin cross-linking factor 1, isoforms 1/2/3/5		MACF1_HUMAN, MACF1, ABP620, ACF7, KIAA0465, KIAA1251	Cytoplasm, Cytoskeleton, Cytoplasm, Golgi apparatus, Cell membrane, Cell projection, Ruffle membrane, Cytoplasm, Golgi apparatus	Q9UPN3 MACF1_HUMAN Microtubule-actin cross-linking factor 1, isoforms 1/2/3/5 Q9UPN3,B1ALC5,E9PJT0,O75053,Q5VW20,Q8WXY1,Q8WXY2,Q96PK2,Q9H540,Q9UKP0,Q9ULG9 620 kDa actin-binding protein, Actin cross-linking family protein 7, Macrophin-1, Trabeculin-alpha ABP620, ACF7, KIAA0465, KIAA1251	actin cytoskeleton, cytoplasm, cytoskeleton, golgi apparatus, membrane, microtubule, plasma membrane, ruffle membrane	plakin or cytolinker family	http://zinc.docking.org/results/combination?filter.purchasability=purchasable&annotation.name=MACF1_HUMAN	http://cansar.icr.ac.uk/cansar/molecular-targets/Q9UPN3/				3	0	3	0	0	2	67	-0.35	75
	Q9UI08	EVL	Ena/VASP-like protein		EVL_HUMAN, EVL, RNB6	Cytoplasm, Cytoskeleton, Cytoplasm, Cytoskeleton, Stress fiber, Cell projection, Lamellipodium	Q9UI08 EVL_HUMAN Ena/VASP-like protein Q9UI08,A8K105,B7Z3I5,O95884,Q7Z522,Q8TBV1,Q9UF25,Q9UIC2 Ena/vasodilator-stimulated phosphoprotein-like RNB6	cytoplasm, cytoskeleton, cytosol, focal adhesion, lamellipodium, membrane, phagocytic vesicle	Ena/VASP family	http://zinc.docking.org/results/combination?filter.purchasability=purchasable&annotation.name=EVL_HUMAN	http://cansar.icr.ac.uk/cansar/molecular-targets/Q9UI08/				0	0	0	0	0	0	0	-3	59
	Q00839	HNRNPU	Heterogeneous nuclear ribonucleoprotein U		HNRPU_HUMAN, HNRNPU, C1orf199, HNRPU, SAFA, U21.1	Nucleus, Nucleus matrix, Chromosome, Nucleus speckle, Cytoplasm, Cytoskeleton, Microtubule organizing center, Centrosome, Chromosome, Centromere, Kinetochore, Cytoplasm, Cytoskeleton, Spindle, Cytoplasm, Cytoskeleton, Spindle pole, Midbody, Cytoplasm, Cell surface, Cytoplasmic granule	Q00839 HNRPU_HUMAN Heterogeneous nuclear ribonucleoprotein U Q00839,O75507,Q8N174,Q96HY9,Q9BQ09 GRIP120, Nuclear p120 ribonucleoprotein, Scaffold-attachment factor A, p120, pp120 C1orf199, HNRPU, SAFA, U21.1	catalytic step 2 spliceosome, cell surface, centrosome, condensed chromosome kinetochore, crd-mediated mrna stability complex, cytoplasmic ribonucleoprotein granule, dendrite cytoplasm, inactive sex chromosome, kinetochore, membrane, midbody, mitotic spindle, mitotic spindle microtubule, mitotic spindle midzone, nuclear chromosome, nuclear matrix, nuclear speck, nucleoplasm, nucleus, protein-cont…		http://zinc.docking.org/results/combination?filter.purchasability=purchasable&annotation.name=HNRPU_HUMAN	http://cansar.icr.ac.uk/cansar/molecular-targets/Q00839/				0	0	0	0	0	0	0	-3	59	1	1	0	0	1	0	0
	P14174	MIF	Macrophage migration inhibitory factor	5.3.2.1	MIF_HUMAN, MIF, GLIF, MMIF	Secreted, Cytoplasm	P14174 MIF_HUMAN Macrophage migration inhibitory factor P14174,A5Z1R8,B2R4S3,Q2V4Y5,Q6FHV0 Glycosylation-inhibiting factor, L-dopachrome isomerase, L-dopachrome tautomerase, Phenylpyruvate tautomerase GLIF, MMIF	cell surface, cytoplasm, cytosol, extracellular exosome, extracellular region, extracellular space, ficolin-1-rich granule lumen, nucleoplasm, plasma membrane, secretory granule lumen, vesicle	MIF family	http://zinc.docking.org/results/combination?filter.purchasability=purchasable&annotation.name=MIF_HUMAN	http://cansar.icr.ac.uk/cansar/molecular-targets/P14174/				93	56	93	79	85	88	95	-0.25	77	1	452	10	9	179	5	5
	Q92841	DDX17	Probable ATP-dependent RNA helicase DDX17	3.6.4.13	DDX17_HUMAN, DDX17	Nucleus, Nucleus, Nucleolus, Cytoplasm, Cytosol	Q92841 DDX17_HUMAN Probable ATP-dependent RNA helicase DDX17 Q92841,B1AHM0,H3BLZ8,Q69YT1,Q6ICD6 DEAD box protein 17, DEAD box protein p72, DEAD box protein p82, RNA-dependent helicase p72	cytoplasm, cytosol, membrane, nuclear speck, nucleolus, nucleoplasm, nucleus, ribonucleoprotein complex	DEAD box helicase family	http://zinc.docking.org/results/combination?filter.purchasability=purchasable&annotation.name=DDX17_HUMAN	http://cansar.icr.ac.uk/cansar/molecular-targets/Q92841/				5	4	5	5	100	5	100	-3	59	1	4	0	0	4	0	0
	P60981	DSTN	Destrin		DEST_HUMAN, DSTN, ACTDP, DSN		P60981 DEST_HUMAN Destrin P60981,B2R6N2,B4DYA6,P18282,Q5W166,Q6IAW2 Actin-depolymerizing factor ACTDP, DSN	actin cytoskeleton, cortical actin cytoskeleton, cytoplasm, extracellular exosome	actin-binding proteins ADF family	http://zinc.docking.org/results/combination?filter.purchasability=purchasable&annotation.name=DEST_HUMAN	http://cansar.icr.ac.uk/cansar/molecular-targets/P60981/				2	0	2	0	0	0	0	-3	59
	P09912	IFI6	Interferon alpha-inducible protein 6		IFI6_HUMAN, IFI6, G1P3	Mitochondrion inner membrane	P09912 IFI6_HUMAN Interferon alpha-inducible protein 6 P09912,Q13141,Q13142,Q5VVR2,Q5VVR3,Q6IE95,Q969M8 Interferon-induced protein 6-16 G1P3	integral component of membrane, mitochondrial inner membrane, mitochondrial membrane, mitochondrion, plasma membrane	IFI6/IFI27 family	http://zinc.docking.org/results/combination?filter.purchasability=purchasable&annotation.name=IFI6_HUMAN	http://cansar.icr.ac.uk/cansar/molecular-targets/P09912/				0	0	0	0	0	0	0	-3	59
	P42766	RPL35	60S ribosomal protein L35		RL35_HUMAN, RPL35		P42766 RL35_HUMAN 60S ribosomal protein L35 P42766,A8K4V7,Q4VBY5,Q5JTN5,Q6IBC7,Q96QJ7,Q9BYF4 Large ribosomal subunit protein uL29	cytosol, cytosolic large ribosomal subunit, membrane, nucleolus	universal ribosomal protein uL29 family	http://zinc.docking.org/results/combination?filter.purchasability=purchasable&annotation.name=RL35_HUMAN	http://cansar.icr.ac.uk/cansar/molecular-targets/P42766/				0	0	0	0	0	0	0	-3	59
	P41567	EIF1	Eukaryotic translation initiation factor 1		EIF1_HUMAN, EIF1, SUI1		P41567 EIF1_HUMAN Eukaryotic translation initiation factor 1 P41567,Q9UNQ9 A121, Protein translation factor SUI1 homolog, Sui1iso1 SUI1	cytoplasm, eukaryotic 43s preinitiation complex, nucleus	SUI1 family	http://zinc.docking.org/results/combination?filter.purchasability=purchasable&annotation.name=EIF1_HUMAN	http://cansar.icr.ac.uk/cansar/molecular-targets/P41567/				3	0	3	1	34	2	67	-3	59
	Q8IWU5	SULF2	Extracellular sulfatase Sulf-2	3.1.6.-	SULF2_HUMAN, SULF2, KIAA1247	Endoplasmic reticulum, Golgi apparatus, Golgi stack, Cell surface	Q8IWU5 SULF2_HUMAN Extracellular sulfatase Sulf-2 Q8IWU5,E1P5U6,Q5JYE1,Q6UX86,Q96SG2,Q9H1H0,Q9UJR3,Q9ULH3 KIAA1247	cell surface, endoplasmic reticulum, extracellular space, golgi stack, plasma membrane	sulfatase family	http://zinc.docking.org/results/combination?filter.purchasability=purchasable&annotation.name=SULF2_HUMAN	http://cansar.icr.ac.uk/cansar/molecular-targets/Q8IWU5/				0	0	0	0	0	0	0	-3	59
	Q02878	RPL6	60S ribosomal protein L6		RL6_HUMAN, RPL6, TXREB1	Cytoplasm, Cytosol, Cytoplasm, Rough endoplasmic reticulum	Q02878 RL6_HUMAN 60S ribosomal protein L6 Q02878,Q2M3Q3,Q8WW97 Large ribosomal subunit protein eL6, Neoplasm-related protein C140, Tax-responsive enhancer element-binding protein 107 TXREB1	cytoplasmic ribonucleoprotein granule, cytosol, cytosolic large ribosomal subunit, focal adhesion, membrane, nucleus, polysomal ribosome, postsynaptic density, rough endoplasmic reticulum	eukaryotic ribosomal protein eL6 family	http://zinc.docking.org/results/combination?filter.purchasability=purchasable&annotation.name=RL6_HUMAN	http://cansar.icr.ac.uk/cansar/molecular-targets/Q02878/				0	0	0	0	0	0	0	-1.35	65
	P78527	PRKDC	DNA-dependent protein kinase catalytic subunit	2.7.11.1	PRKDC_HUMAN, PRKDC, HYRC, HYRC1	Nucleus, Nucleus, Nucleolus	P78527 PRKDC_HUMAN DNA-dependent protein kinase catalytic subunit P78527,P78528,Q13327,Q13337,Q14175,Q59H99,Q7Z611,Q96SE6,Q9UME3 DNPK1, p460 HYRC, HYRC1	cytosol, dna-dependent protein kinase-dna ligase 4 complex, membrane, nonhomologous end joining complex, nuclear chromosome, nucleolus, nucleoplasm, nucleus, protein-containing complex, protein-dna complex, small-subunit processome, transcription regulator complex	PI3/PI4-kinase family	http://zinc.docking.org/results/combination?filter.purchasability=purchasable&annotation.name=PRKDC_HUMAN	http://cansar.icr.ac.uk/cansar/molecular-targets/P78527/	25.23|P42345|MTOR|Everolimus|Whole:::Protein			3	0	1	1	100	1	100	1.65	95	1	1185	142	43	606	82	32
	P22392	NME2	Nucleoside diphosphate kinase B	2.7.4.6	NDKB_HUMAN, NME2, NM23B	Cytoplasm, Nucleus, Cell projection, Lamellipodium, Cell projection, Ruffle	P22392 NDKB_HUMAN Nucleoside diphosphate kinase B P22392,A8MWA3,Q1WM23,Q6LCT6 C-myc purine-binding transcription factor PUF, Histidine protein kinase NDKB, nm23-H2 NM23B	cell periphery, cytoplasm, cytosol, extracellular exosome, extracellular region, ficolin-1-rich granule lumen, intermediate filament, lamellipodium, mitochondrial membrane, nucleus, perinuclear region of cytoplasm, ruffle, secretory granule lumen	NDK family	http://zinc.docking.org/results/combination?filter.purchasability=purchasable&annotation.name=NDKB_HUMAN	http://cansar.icr.ac.uk/cansar/molecular-targets/P22392/				5	3	5	5	100	5	100	0.2	82	1	77	0	0	43	0	0
	Q14697	GANAB	Neutral alpha-glucosidase AB	3.2.1.207	GANAB_HUMAN, GANAB, G2AN, KIAA0088	Endoplasmic reticulum, Golgi apparatus, Melanosome	Q14697 GANAB_HUMAN Neutral alpha-glucosidase AB Q14697,A6NC20,Q8WTS9,Q9P0X0 Alpha-glucosidase 2, Glucosidase II subunit alpha G2AN, KIAA0088	endoplasmic reticulum lumen, extracellular exosome, glucosidase ii complex, golgi apparatus, intracellular membrane-bounded organelle, melanosome, membrane	glycosyl hydrolase 31 family	http://zinc.docking.org/results/combination?filter.purchasability=purchasable&annotation.name=GANAB_HUMAN	http://cansar.icr.ac.uk/cansar/molecular-targets/Q14697/	31.41|O43451|MGAM|Miglitol,Acarbose|Whole:::Protein			0	0	0	0	0	0	0	-0.7	72	1	28	3	3	14	2	2
	P61586	RHOA	Transforming protein RhoA	3.6.5.2	RHOA_HUMAN, RHOA, ARH12, ARHA, RHO12	Cell membrane, Cytoplasm, Cytoskeleton, Cleavage furrow, Cytoplasm, Cell cortex, Midbody, Cell projection, Lamellipodium, Cell projection, Dendrite	P61586 RHOA_HUMAN Transforming protein RhoA P61586,P06749,Q53HM4,Q5U024,Q9UDJ0,Q9UEJ4 Rho cDNA clone 12 ARH12, ARHA, RHO12	apical junction complex, axon, cell cortex, cell junction, cell periphery, cleavage furrow, cytoplasm, cytoskeleton, cytosol, dendritic spine, endoplasmic reticulum membrane, endosome, extracellular exosome, extrinsic component of cytoplasmic side of plasma membrane, ficolin-1-rich granule membrane, focal adhesion, glutamatergic synapse, lamellipodium, midbody, nucleus, plasma membrane, postsynap…	Rho family	http://zinc.docking.org/results/combination?filter.purchasability=purchasable&annotation.name=RHOA_HUMAN	http://cansar.icr.ac.uk/cansar/molecular-targets/P61586/				46	39	46	14	31	40	87	-1.6	63	1	149	0	0	83	0	0
	O43707	ACTN4	Alpha-actinin-4		ACTN4_HUMAN, ACTN4	Nucleus, Cytoplasm, Cell junction, Cytoplasm, Cytoskeleton, Stress fiber	O43707 ACTN4_HUMAN Alpha-actinin-4 O43707,A4K467,D6PXK4,O76048 Non-muscle alpha-actinin 4	brush border, cell-cell junction, cortical cytoskeleton, cytoplasm, cytosol, extracellular exosome, extracellular region, extracellular space, focal adhesion, neuron projection, nuclear body, nucleus, perinuclear region of cytoplasm, platelet alpha granule lumen, protein-containing complex, pseudopodium, ribonucleoprotein complex, stress fiber, z disc	alpha-actinin family	http://zinc.docking.org/results/combination?filter.purchasability=purchasable&annotation.name=ACTN4_HUMAN	http://cansar.icr.ac.uk/cansar/molecular-targets/O43707/				5	0	4	0	0	4	100	-1.1	67
	P21291	CSRP1	Cysteine and glycine-rich protein 1		CSRP1_HUMAN, CSRP1, CSRP, CYRP	Nucleus	P21291 CSRP1_HUMAN Cysteine and glycine-rich protein 1 P21291,A8K268,Q5U0J2 Cysteine-rich protein 1, Epididymis luminal protein 141 CSRP, CYRP	cytoplasm, extracellular exosome, focal adhesion, nucleus, z disc		http://zinc.docking.org/results/combination?filter.purchasability=purchasable&annotation.name=CSRP1_HUMAN	http://cansar.icr.ac.uk/cansar/molecular-targets/P21291/				0	0	0	0	0	0	0	-0.8	71
	Q14204	DYNC1H1	Cytoplasmic dynein 1 heavy chain 1		DYHC1_HUMAN, DYNC1H1, DHC1, DNCH1, DNCL, DNECL, DYHC, KIAA0325	Cytoplasm, Cytoskeleton	Q14204 DYHC1_HUMAN Cytoplasmic dynein 1 heavy chain 1 Q14204,B0I1R0,Q6DKQ7,Q8WU28,Q92814,Q9Y4G5 Cytoplasmic dynein heavy chain 1, Dynein heavy chain, cytosolic DHC1, DNCH1, DNCL, DNECL, DYHC, KIAA0325	axon cytoplasm, azurophil granule lumen, cell cortex, centrosome, cytoplasmic dynein complex, cytoplasmic microtubule, cytosol, dynein complex, extracellular exosome, extracellular region, filopodium, membrane, microtubule	dynein heavy chain family	http://zinc.docking.org/results/combination?filter.purchasability=purchasable&annotation.name=DYHC1_HUMAN	http://cansar.icr.ac.uk/cansar/molecular-targets/Q14204/				11	1	11	6	55	11	100	1.5	94
	P10451	SPP1	Osteopontin		OSTP_HUMAN, SPP1, BNSP, OPN	Secreted	P10451 OSTP_HUMAN Osteopontin P10451,B2RDA1,Q15681,Q15682,Q15683,Q4W597,Q567T5,Q8NBK2,Q96IZ1 Bone sialoprotein 1, Nephropontin, Secreted phosphoprotein 1, Urinary stone protein, Uropontin BNSP, OPN	cell projection, endoplasmic reticulum lumen, extracellular exosome, extracellular region, extracellular space, golgi apparatus, perinuclear region of cytoplasm	osteopontin family	http://zinc.docking.org/results/combination?filter.purchasability=purchasable&annotation.name=OSTP_HUMAN	http://cansar.icr.ac.uk/cansar/molecular-targets/P10451/				2	0	0	0	0	0	0	-3	59
	Q9H6X2	ANTXR1	Anthrax toxin receptor 1		ANTR1_HUMAN, ANTXR1, ATR, TEM8	Cell membrane, Cell projection, Lamellipodium membrane, Cell projection, Filopodium membrane	Q9H6X2 ANTR1_HUMAN Anthrax toxin receptor 1 Q9H6X2,A8K7U8,J7K7G4,J7KF88,Q4ZFV6,Q53QD8,Q96P02,Q9NVP3 Tumor endothelial marker 8 ATR, TEM8	cell surface, endosome membrane, external side of plasma membrane, filopodium membrane, integral component of membrane, lamellipodium membrane, plasma membrane	ATR family	http://zinc.docking.org/results/combination?filter.purchasability=purchasable&annotation.name=ANTR1_HUMAN	http://cansar.icr.ac.uk/cansar/molecular-targets/Q9H6X2/				5	0	5	1	20	4	80	-1.85	60
	Q8TCU6	PREX1	Phosphatidylinositol 3,4,5-trisphosphate-dependent Rac exchanger 1 protein		PREX1_HUMAN, PREX1, KIAA1415	Cytoplasm, Cytosol, Cell membrane	Q8TCU6 PREX1_HUMAN Phosphatidylinositol 3,4,5-trisphosphate-dependent Rac exchanger 1 protein Q8TCU6,E1P5X9,Q5JS95,Q5JS96,Q69YL2,Q7Z2L9,Q9BQH0,Q9BX55,Q9H4Q6,Q9P2D2,Q9UGQ4 KIAA1415	cytosol, dendritic shaft, growth cone, perinuclear region of cytoplasm, plasma membrane		http://zinc.docking.org/results/combination?filter.purchasability=purchasable&annotation.name=PREX1_HUMAN	http://cansar.icr.ac.uk/cansar/molecular-targets/Q8TCU6/				11	2	11	3	28	10	91	-0.95	69
	P12814	ACTN1	Alpha-actinin-1		ACTN1_HUMAN, ACTN1	Cytoplasm, Cytoskeleton, Cytoplasm, Myofibril, Sarcomere, Z line, Cell membrane, Cell junction, Cell projection, Ruffle	P12814 ACTN1_HUMAN Alpha-actinin-1 P12814,B3V8S3,B4DHH3,B7TY16,Q1HE25,Q9BTN1 Alpha-actinin cytoskeletal isoform, F-actin cross-linking protein, Non-muscle alpha-actinin-1	brush border, cell projection, cell-cell junction, cytoplasm, cytosol, extracellular exosome, extracellular region, extracellular space, fascia adherens, focal adhesion, glutamatergic synapse, plasma membrane, platelet alpha granule lumen, pseudopodium, ruffle, stress fiber, z disc	alpha-actinin family	http://zinc.docking.org/results/combination?filter.purchasability=purchasable&annotation.name=ACTN1_HUMAN	http://cansar.icr.ac.uk/cansar/molecular-targets/P12814/				5	0	5	2	40	5	100	-3	59
	P62987	UBA52	Ubiquitin-60S ribosomal protein L40		RL40_HUMAN, UBA52, UBCEP2	Cytoplasm, Nucleus, Cytoplasm	P62987 RL40_HUMAN Ubiquitin-60S ribosomal protein L40 P62987,P02248,P02249,P02250,P14793,P62988,Q29120,Q6LBL4,Q6LDU5,Q8WYN8,Q91887,Q91888,Q9BWD6,Q9BX98,Q9UEF2,Q9UEG1,Q9UEK8,Q9UPK7 CEP52, Ubiquitin A-52 residue ribosomal protein fusion product 1 UBCEP2	cytoplasm, cytosol, cytosolic large ribosomal subunit, cytosolic small ribosomal subunit, endocytic vesicle membrane, endoplasmic reticulum, endoplasmic reticulum membrane, endosome membrane, extracellular exosome, extracellular space, host cell, lysosomal membrane, mitochondrial outer membrane, nucleoplasm, nucleus, plasma membrane, small ribosomal subunit, vesicle		http://zinc.docking.org/results/combination?filter.purchasability=purchasable&annotation.name=RL40_HUMAN	http://cansar.icr.ac.uk/cansar/molecular-targets/P62987/				109	15	109	16	15	57	53	1	90
	Q8WX93	PALLD	Palladin		PALLD_HUMAN, PALLD, KIAA0992	Cytoplasm, Cytoskeleton, Cell junction, Focal adhesion, Cytoplasm, Myofibril, Sarcomere, Z line, Cell projection, Ruffle, Cell projection, Podosome, Cell projection, Lamellipodium, Cell projection, Axon, Cell projection, Growth cone	Q8WX93 PALLD_HUMAN Palladin Q8WX93,B3KTG2,B5MD56,B7ZMM5,Q7L3E0,Q7Z3W0,Q86WE8,Q8N1M2,Q9UGA0,Q9UQF5,Q9Y2J6,Q9Y3E9 SIH002, Sarcoma antigen NY-SAR-77 KIAA0992	actin cytoskeleton, actin filament, axon, cytosol, excitatory synapse, focal adhesion, growth cone, lamellipodium, nucleus, plasma membrane, podosome, ruffle, stress fiber, z disc	myotilin/palladin family	http://zinc.docking.org/results/combination?filter.purchasability=purchasable&annotation.name=PALLD_HUMAN	http://cansar.icr.ac.uk/cansar/molecular-targets/Q8WX93/	29.08|P11362|FGFR1|Vandetanib,Pemigatinib,Pazopanib Hydrochloride,Pazopanib,Erdafitinib|Whole:::Protein			2	0	2	1	50	2	100	1.25	92
	O60716	CTNND1	Catenin delta-1		CTND1_HUMAN, CTNND1, KIAA0384	Cell junction, Adherens junction, Cytoplasm, Nucleus, Cell membrane, Nucleus, Nucleus, Nucleus	O60716 CTND1_HUMAN Catenin delta-1 O60716,A8K939,O15088,O60713,O60714,O60715,O60935,Q6DHZ7,Q6RBX8,Q9UP71,Q9UP72,Q9UP73 Cadherin-associated Src substrate, p120 catenin, p120(cas) KIAA0384	adherens junction, catenin complex, cell-cell junction, cytoplasm, cytosol, dendritic spine, extracellular exosome, glutamatergic synapse, growth cone, hippocampal mossy fiber to ca3 synapse, lamellipodium, midbody, nucleus, plasma membrane, postsynaptic density, presynaptic active zone cytoplasmic component, schaffer collateral - ca1 synapse, zonula adherens	beta-catenin family	http://zinc.docking.org/results/combination?filter.purchasability=purchasable&annotation.name=CTND1_HUMAN	http://cansar.icr.ac.uk/cansar/molecular-targets/O60716/				2	0	2	0	0	1	50	-3	59
	P28799	GRN	Progranulin		GRN_HUMAN, GRN	Secreted, Lysosome	P28799 GRN_HUMAN Progranulin P28799,D3DX55,P23781,P23782,P23783,P23784,Q53HQ8,Q53Y88,Q540U8,Q9BWE7,Q9H8S1,Q9UCH0 Acrogranin, Epithelin precursor, Glycoprotein of 88 Kda, Granulin precursor, PC cell-derived growth factor, Proepithelin	azurophil granule lumen, endoplasmic reticulum, endosome, extracellular exosome, extracellular region, extracellular space, golgi apparatus, late endosome, lysosomal membrane, lysosome, membrane, plasma membrane, trans-golgi network	granulin family	http://zinc.docking.org/results/combination?filter.purchasability=purchasable&annotation.name=GRN_HUMAN	http://cansar.icr.ac.uk/cansar/molecular-targets/P28799/				6	0	5	0	0	2	40	-3	59
	Q14011	CIRBP	Cold-inducible RNA-binding protein		CIRBP_HUMAN, CIRBP, A18HNRNP, CIRP	Nucleus, Nucleoplasm, Cytoplasm	Q14011 CIRBP_HUMAN Cold-inducible RNA-binding protein Q14011,B3KT17,B4E2X2 A18 hnRNP, Glycine-rich RNA-binding protein CIRP A18HNRNP, CIRP	cytoplasm, cytoplasmic stress granule, nucleoplasm, nucleus, ribonucleoprotein complex, spliceosomal complex		http://zinc.docking.org/results/combination?filter.purchasability=purchasable&annotation.name=CIRBP_HUMAN	http://cansar.icr.ac.uk/cansar/molecular-targets/Q14011/				2	0	2	0	0	0	0	-1.1	67
	P11047	LAMC1	Laminin subunit gamma-1		LAMC1_HUMAN, LAMC1, LAMB2	Secreted, Extracellular space, Extracellular matrix, Basement membrane	P11047 LAMC1_HUMAN Laminin subunit gamma-1 P11047,Q5VYE7 Laminin B2 chain, Laminin-1 subunit gamma, Laminin-10 subunit gamma, Laminin-11 subunit gamma, Laminin-2 subunit gamma, Laminin-3 subunit gamma, Laminin-4 subunit gamma, Laminin-6 subunit gamma, Laminin-7 subunit gamma, Laminin-8 subunit gamma, Laminin-9 subunit gamma, S-laminin subunit gamma LAMB2	basement membrane, collagen-containing extracellular matrix, endoplasmic reticulum lumen, extracellular exosome, extracellular region, extracellular space, laminin-1 complex, laminin-10 complex, laminin-11 complex		http://zinc.docking.org/results/combination?filter.purchasability=purchasable&annotation.name=LAMC1_HUMAN	http://cansar.icr.ac.uk/cansar/molecular-targets/P11047/				1	0	1	0	0	0	0	-3	59
	P52569	SLC7A2	Cationic amino acid transporter 2		CTR2_HUMAN, SLC7A2, ATRC2, CAT2	Cell membrane	P52569 CTR2_HUMAN Cationic amino acid transporter 2 P52569,B7ZL54,O15291,O15292,Q14CQ6,Q6NSZ7,Q86TC6 Low affinity cationic amino acid transporter 2, Solute carrier family 7 member 2 ATRC2, CAT2	cell junction, integral component of plasma membrane, plasma membrane	Cationic amino acid transporter (CAT) (TC 2.A.3.3) family	http://zinc.docking.org/results/combination?filter.purchasability=purchasable&annotation.name=CTR2_HUMAN	http://cansar.icr.ac.uk/cansar/molecular-targets/P52569/				0	0	0	0	0	0	0	-1.6	63
	P05026	ATP1B1	Sodium/potassium-transporting ATPase subunit beta-1		AT1B1_HUMAN, ATP1B1, ATP1B	Cell membrane, Cell membrane, Sarcolemma	P05026 AT1B1_HUMAN Sodium/potassium-transporting ATPase subunit beta-1 P05026,Q5TGZ3 Sodium/potassium-dependent ATPase subunit beta-1 ATP1B	apical plasma membrane, basolateral plasma membrane, caveola, extracellular exosome, extracellular vesicle, intercalated disc, lateral plasma membrane, membrane, organelle membrane, plasma membrane, sarcolemma, sodium, sperm flagellum, t-tubule	X(+)/potassium ATPases subunit beta family	http://zinc.docking.org/results/combination?filter.purchasability=purchasable&annotation.name=AT1B1_HUMAN	http://cansar.icr.ac.uk/cansar/molecular-targets/P05026/	100.00|P05026|ATP1B1|Acetyldigitoxin|Whole:::Protein	100.00|P05026|ATP1B1|Acetyldigitoxin|Whole:::Protein	100.00|P05026|ATP1B1|Acetyldigitoxin|Whole:::Protein||39.07|P14415|ATP1B2|Acetyldigitoxin|Whole:::Protein||36.00|P54709|ATP1B3|Acetyldigitoxin|Whole:::Protein	1	1	1	0	0	0	0	0.3	83	1	351	31	7	123	10	4
	Q9Y5V3	MAGED1	Melanoma-associated antigen D1		MAGD1_HUMAN, MAGED1, NRAGE	Cytoplasm, Cell membrane, Nucleus	Q9Y5V3 MAGD1_HUMAN Melanoma-associated antigen D1 Q9Y5V3,Q5VSH6,Q8IZ84,Q8WY92,Q9H352,Q9HBT4,Q9UF36 MAGE tumor antigen CCF, MAGE-D1 antigen, Neurotrophin receptor-interacting MAGE homolog NRAGE	chromatin, cytoplasm, nucleus, plasma membrane, protein-containing complex		http://zinc.docking.org/results/combination?filter.purchasability=purchasable&annotation.name=MAGD1_HUMAN	http://cansar.icr.ac.uk/cansar/molecular-targets/Q9Y5V3/				0	0	0	0	0	0	0	-3	59
	Q16270	IGFBP7	Insulin-like growth factor-binding protein 7		IBP7_HUMAN, IGFBP7, MAC25, PSF	Secreted	Q16270 IBP7_HUMAN Insulin-like growth factor-binding protein 7 Q16270,B4E1N2,B7Z9W7,Q07822,Q53YE6,Q9UCA8 IGFBP-rP1, MAC25 protein, PGI2-stimulating factor, Prostacyclin-stimulating factor, Tumor-derived adhesion factor MAC25, PSF	collagen-containing extracellular matrix, endoplasmic reticulum lumen, extracellular exosome, extracellular region, extracellular space		http://zinc.docking.org/results/combination?filter.purchasability=purchasable&annotation.name=IBP7_HUMAN	http://cansar.icr.ac.uk/cansar/molecular-targets/Q16270/				0	0	0	0	0	0	0	-0.65	72
	P50454	SERPINH1	Serpin H1		SERPH_HUMAN, SERPINH1, CBP1, CBP2, HSP47, SERPINH2	Endoplasmic reticulum lumen	P50454 SERPH_HUMAN Serpin H1 P50454,B3KVJ3,P29043,Q5XPB4,Q6NSJ6,Q8IY96,Q9NP88 47 kDa heat shock protein, Arsenic-transactivated protein 3, Cell proliferation-inducing gene 14 protein, Collagen-binding protein, Rheumatoid arthritis-related antigen RA-A47 CBP1, CBP2, HSP47, SERPINH2	collagen-containing extracellular matrix, endoplasmic reticulum, endoplasmic reticulum lumen, endoplasmic reticulum-golgi intermediate compartment, extracellular space, membrane raft	serpin family	http://zinc.docking.org/results/combination?filter.purchasability=purchasable&annotation.name=SERPH_HUMAN	http://cansar.icr.ac.uk/cansar/molecular-targets/P50454/				0	0	0	0	0	0	0	-1.8	60	1	4	0	0	3	0	0
	P43235	CTSK	Cathepsin K	3.4.22.38	CATK_HUMAN, CTSK, CTSO, CTSO2	Lysosome, Secreted, Apical cell membrane	P43235 CATK_HUMAN Cathepsin K P43235,Q6FHS6 Cathepsin O, Cathepsin O2, Cathepsin X CTSO, CTSO2	apical plasma membrane, endolysosome lumen, external side of plasma membrane, extracellular region, extracellular space, intracellular membrane-bounded organelle, lysosomal lumen, lysosome, nucleoplasm	peptidase C1 family	http://zinc.docking.org/results/combination?filter.purchasability=purchasable&annotation.name=CATK_HUMAN	http://cansar.icr.ac.uk/cansar/molecular-targets/P43235/				63	55	63	1	2	63	100	1.75	96	1	2703	1003	605	1263	529	320
	P60174	TPI1	Triosephosphate isomerase	5.3.1.1	TPIS_HUMAN, TPI1, TPI	Cytoplasm	P60174 TPIS_HUMAN Triosephosphate isomerase P60174,B7Z5D8,D3DUS9,P00938,Q6FHP9,Q6IS07,Q8WWD0,Q96AG5 Methylglyoxal synthase, Triose-phosphate isomerase TPI	cytosol, extracellular exosome, extracellular space, nucleus	triosephosphate isomerase family	http://zinc.docking.org/results/combination?filter.purchasability=purchasable&annotation.name=TPIS_HUMAN	http://cansar.icr.ac.uk/cansar/molecular-targets/P60174/				22	4	17	9	53	17	100	-3	59	1	18	0	0	10	0	0
	P63220	RPS21	40S ribosomal protein S21		RS21_HUMAN, RPS21	Cytoplasm, Cytosol, Cytoplasm, Rough endoplasmic reticulum	P63220 RS21_HUMAN 40S ribosomal protein S21 P63220,P35265 Small ribosomal subunit protein eS21	cytosol, cytosolic small ribosomal subunit, nucleoplasm, polysomal ribosome, rough endoplasmic reticulum, small ribosomal subunit, synapse	eukaryotic ribosomal protein eS21 family	http://zinc.docking.org/results/combination?filter.purchasability=purchasable&annotation.name=RS21_HUMAN	http://cansar.icr.ac.uk/cansar/molecular-targets/P63220/				17	0	17	0	0	5	30	-3	59
	Q8N131	TMEM123	Porimin		PORIM_HUMAN, TMEM123, KCT3	Membrane	Q8N131 PORIM_HUMAN Porimin Q8N131,Q8IWS2,Q96QV2 Keratinocytes-associated transmembrane protein 3, Pro-oncosis receptor inducing membrane injury, Transmembrane protein 123 KCT3	cytoplasmic vesicle, external side of plasma membrane, integral component of membrane	CD164 family	http://zinc.docking.org/results/combination?filter.purchasability=purchasable&annotation.name=PORIM_HUMAN	http://cansar.icr.ac.uk/cansar/molecular-targets/Q8N131/				0	0	0	0	0	0	0	-3	59
	O95715	CXCL14	C-X-C motif chemokine 14		CXL14_HUMAN, CXCL14, MIP2G, NJAC, SCYB14	Secreted	O95715 CXL14_HUMAN C-X-C motif chemokine 14 O95715,B3KQU8,Q6UW97,Q86U69,Q9BTR1,Q9NS21 Chemokine BRAK, MIP-2G, Small-inducible cytokine B14 MIP2G, NJAC, SCYB14	extracellular space, golgi apparatus	intercrine alpha (chemokine CxC) family	http://zinc.docking.org/results/combination?filter.purchasability=purchasable&annotation.name=CXL14_HUMAN	http://cansar.icr.ac.uk/cansar/molecular-targets/O95715/				1	0	1	0	0	0	0	-3	59
	P48509	CD151	CD151 antigen		CD151_HUMAN, CD151, TSPAN24	Membrane	P48509 CD151_HUMAN CD151 antigen P48509,A8KAK8,E9PI15,Q14826,Q86U54,Q96TE3 GP27, Membrane glycoprotein SFA-1, Platelet-endothelial tetraspan antigen 3, Tetraspanin-24 TSPAN24	basement membrane, cell surface, cytosol, focal adhesion, integral component of plasma membrane, membrane, plasma membrane	tetraspanin (TM4SF) family	http://zinc.docking.org/results/combination?filter.purchasability=purchasable&annotation.name=CD151_HUMAN	http://cansar.icr.ac.uk/cansar/molecular-targets/P48509/				0	0	0	0	0	0	0	-3	59
	Q9Y365	STARD10	START domain-containing protein 10		STA10_HUMAN, STARD10, SDCCAG28	Cell projection, Cilium, Flagellum, Cytoplasm, Membrane	Q9Y365 STA10_HUMAN START domain-containing protein 10 Q9Y365,O60532 Antigen NY-CO-28, PCTP-like protein, Serologically defined colon cancer antigen 28, StAR-related lipid transfer protein 10 SDCCAG28	cytosol, intercellular canaliculus, membrane, microvillus, motile cilium		http://zinc.docking.org/results/combination?filter.purchasability=purchasable&annotation.name=STA10_HUMAN	http://cansar.icr.ac.uk/cansar/molecular-targets/Q9Y365/				0	0	0	0	0	0	0	-3	59
	Q13740	ALCAM	CD166 antigen		CD166_HUMAN, ALCAM, MEMD	Cell membrane, Cell projection, Axon, Cell projection, Dendrite, Secreted	Q13740 CD166_HUMAN CD166 antigen Q13740,B2RNS3,B4DTU0,O60892,Q1HGM8,Q1HGM9,Q6PEY4,Q6ZS95 Activated leukocyte cell adhesion molecule MEMD	axon, dendrite, external side of plasma membrane, extracellular exosome, focal adhesion, immunological synapse, integral component of plasma membrane, intrinsic component of plasma membrane, neuronal cell body		http://zinc.docking.org/results/combination?filter.purchasability=purchasable&annotation.name=CD166_HUMAN	http://cansar.icr.ac.uk/cansar/molecular-targets/Q13740/				1	1	1	0	0	0	0	-0.55	73
	P47974	ZFP36L2	mRNA decay activator protein ZFP36L2		TISD_HUMAN, ZFP36L2, BRF2, ERF2, RNF162C, TIS11D	Nucleus, Cytoplasm	P47974 TISD_HUMAN mRNA decay activator protein ZFP36L2 P47974,Q53TB4,Q9BSJ3 Butyrate response factor 2, EGF-response factor 2, TPA-induced sequence 11d, Zinc finger protein 36, C3H1 type-like 2 BRF2, ERF2, RNF162C, TIS11D	cytoplasm, nucleus		http://zinc.docking.org/results/combination?filter.purchasability=purchasable&annotation.name=TISD_HUMAN	http://cansar.icr.ac.uk/cansar/molecular-targets/P47974/				3	0	1	0	0	1	100	-3	59
	Q14767	LTBP2	Latent-transforming growth factor beta-binding protein 2		LTBP2_HUMAN, LTBP2, C14orf141, LTBP3	Secreted, Extracellular space, Extracellular matrix	Q14767 LTBP2_HUMAN Latent-transforming growth factor beta-binding protein 2 Q14767,Q99907,Q9NS51 C14orf141, LTBP3	collagen-containing extracellular matrix, extracellular exosome, extracellular matrix, extracellular region, extracellular space	LTBP family	http://zinc.docking.org/results/combination?filter.purchasability=purchasable&annotation.name=LTBP2_HUMAN	http://cansar.icr.ac.uk/cansar/molecular-targets/Q14767/				0	0	0	0	0	0	0	1.1	91
	Q01082	SPTBN1	Spectrin beta chain, non-erythrocytic 1		SPTB2_HUMAN, SPTBN1, SPTB2	Cytoplasm, Cytoskeleton, Cytoplasm, Myofibril, Sarcomere, M line, Cell membrane	Q01082 SPTB2_HUMAN Spectrin beta chain, non-erythrocytic 1 Q01082,B2RP63,O60837,Q16057,Q53R99,Q59ER3,Q8IX99 Beta-II spectrin, Fodrin beta chain, Spectrin, non-erythroid beta chain 1 SPTB2	axolemma, cuticular plate, cytoplasm, cytosol, extracellular exosome, glutamatergic synapse, m band, nucleolus, postsynaptic density, spectrin, spectrin-associated cytoskeleton	spectrin family	http://zinc.docking.org/results/combination?filter.purchasability=purchasable&annotation.name=SPTB2_HUMAN	http://cansar.icr.ac.uk/cansar/molecular-targets/Q01082/				3	0	3	0	0	1	34	-0.35	75
	Q9Y262	EIF3L	Eukaryotic translation initiation factor 3 subunit L		EIF3L_HUMAN, EIF3L, EIF3EIP, EIF3S6IP	Cytoplasm	Q9Y262 EIF3L_HUMAN Eukaryotic translation initiation factor 3 subunit L Q9Y262,B2RDG6,B4DYB2,G8JLH4,Q53HQ1,Q53HT4,Q5QTR1,Q5TI15,Q6ICD2 Eukaryotic translation initiation factor 3 subunit 6-interacting protein, Eukaryotic translation initiation factor 3 subunit E-interacting protein EIF3EIP, EIF3S6IP	cytosol, eukaryotic 43s preinitiation complex, eukaryotic 48s preinitiation complex, eukaryotic translation initiation factor 3 complex, fibrillar center, membrane, nucleoplasm	eIF-3 subunit L family	http://zinc.docking.org/results/combination?filter.purchasability=purchasable&annotation.name=EIF3L_HUMAN	http://cansar.icr.ac.uk/cansar/molecular-targets/Q9Y262/				2	0	2	2	100	2	100	-3	59
	P54368	OAZ1	Ornithine decarboxylase antizyme 1		OAZ1_HUMAN, OAZ1, OAZ		P54368 OAZ1_HUMAN Ornithine decarboxylase antizyme 1 P54368,O43382,Q14989,Q92595,Q9UPL9 OAZ	cytoplasm, cytosol, nucleus	ODC antizyme family	http://zinc.docking.org/results/combination?filter.purchasability=purchasable&annotation.name=OAZ1_HUMAN	http://cansar.icr.ac.uk/cansar/molecular-targets/P54368/				3	0	3	0	0	2	67	-3	59
	P05412	JUN	Transcription factor AP-1		JUN_HUMAN, JUN	Nucleus	P05412 JUN_HUMAN Transcription factor AP-1 P05412,Q6FHM7,Q96G93 Activator protein 1, Proto-oncogene c-Jun, V-jun avian sarcoma virus 17 oncogene homolog, p39	cytosol, nuclear chromatin, nuclear chromosome, nuclear euchromatin, nucleoplasm, nucleus, transcription factor ap-1 complex, transcription regulator complex, transcription repressor complex	bZIP family	http://zinc.docking.org/results/combination?filter.purchasability=purchasable&annotation.name=JUN_HUMAN	http://cansar.icr.ac.uk/cansar/molecular-targets/P05412/				8	1	8	0	0	0	0	0.9	89	1	366	16	12	158	13	10
	P60228	EIF3E	Eukaryotic translation initiation factor 3 subunit E		EIF3E_HUMAN, EIF3E, EIF3S6, INT6	Cytoplasm, Nucleus, PML body	P60228 EIF3E_HUMAN Eukaryotic translation initiation factor 3 subunit E P60228,O43902,Q64058,Q64059,Q64252,Q6FG33,Q8WVK4 Eukaryotic translation initiation factor 3 subunit 6, Viral integration site protein INT-6 homolog, eIF-3 p48 EIF3S6, INT6	cytoplasm, cytosol, eukaryotic 43s preinitiation complex, eukaryotic 48s preinitiation complex, eukaryotic translation initiation factor 3 complex, eukaryotic translation initiation factor 3 complex, extracellular exosome, membrane, nucleoplasm, nucleus, pml body	eIF-3 subunit E family	http://zinc.docking.org/results/combination?filter.purchasability=purchasable&annotation.name=EIF3E_HUMAN	http://cansar.icr.ac.uk/cansar/molecular-targets/P60228/				3	0	3	3	100	3	100	1.3	93
	P43308	SSR2	Translocon-associated protein subunit beta		SSRB_HUMAN, SSR2, TRAPB	Endoplasmic reticulum membrane	P43308 SSRB_HUMAN Translocon-associated protein subunit beta P43308,B2R9K9,D3DVA7,Q53HI0,Q5VY95,Q5VY96,Q6IB31,Q9BWE4 Signal sequence receptor subunit beta TRAPB	endoplasmic reticulum, endoplasmic reticulum membrane, integral component of membrane	TRAP-beta family	http://zinc.docking.org/results/combination?filter.purchasability=purchasable&annotation.name=SSRB_HUMAN	http://cansar.icr.ac.uk/cansar/molecular-targets/P43308/				0	0	0	0	0	0	0	-3	59
	O14493	CLDN4	Claudin-4		CLD4_HUMAN, CLDN4, CPER, CPETR1, WBSCR8	Cell junction, Tight junction, Cell membrane	O14493 CLD4_HUMAN Claudin-4 O14493 Clostridium perfringens enterotoxin receptor, Williams-Beuren syndrome chromosomal region 8 protein CPER, CPETR1, WBSCR8	apical plasma membrane, apicolateral plasma membrane, basal plasma membrane, bicellular tight junction, cell-cell junction, chloride channel complex, integral component of plasma membrane, lateral plasma membrane, plasma membrane, tight junction	claudin family	http://zinc.docking.org/results/combination?filter.purchasability=purchasable&annotation.name=CLD4_HUMAN	http://cansar.icr.ac.uk/cansar/molecular-targets/O14493/				1	0	1	1	100	1	100	-3	59
	Q9UKW4	VAV3	Guanine nucleotide exchange factor VAV3		VAV3_HUMAN, VAV3		Q9UKW4 VAV3_HUMAN Guanine nucleotide exchange factor VAV3 Q9UKW4,B1AMM0,B1APV5,B4E232,B7ZLR1,E9PQ97,O60498,O95230,Q9Y5X8	cytosol, immunological synapse		http://zinc.docking.org/results/combination?filter.purchasability=purchasable&annotation.name=VAV3_HUMAN	http://cansar.icr.ac.uk/cansar/molecular-targets/Q9UKW4/				1	0	1	0	0	1	100	1.35	93
	P62277	RPS13	40S ribosomal protein S13		RS13_HUMAN, RPS13		P62277 RS13_HUMAN 40S ribosomal protein S13 P62277,B2R549,P19116,Q02546,Q29200,Q498Y0 Small ribosomal subunit protein uS15	cytosol, cytosolic small ribosomal subunit, extracellular exosome, focal adhesion, membrane, nucleolus, nucleoplasm, nucleus, postsynaptic density, ribosome	universal ribosomal protein uS15 family	http://zinc.docking.org/results/combination?filter.purchasability=purchasable&annotation.name=RS13_HUMAN	http://cansar.icr.ac.uk/cansar/molecular-targets/P62277/				26	0	26	0	0	25	97	-3	59
	Q96FQ6	S100A16	Protein S100-A16		S10AG_HUMAN, S100A16, S100F	Nucleus, Nucleolus, Cytoplasm	Q96FQ6 S10AG_HUMAN Protein S100-A16 Q96FQ6,A8K439,D3DV52,Q5RHS6 Aging-associated gene 13 protein, Protein S100-F, S100 calcium-binding protein A16 S100F	cytosol, extracellular exosome, extracellular space, nucleolus, plasma membrane	S-100 family	http://zinc.docking.org/results/combination?filter.purchasability=purchasable&annotation.name=S10AG_HUMAN	http://cansar.icr.ac.uk/cansar/molecular-targets/Q96FQ6/				3	0	3	0	0	3	100	-3	59
	Q6UXI9	NPNT	Nephronectin		NPNT_HUMAN, NPNT, EGFL6L, POEM	Secreted, Extracellular space, Extracellular matrix	Q6UXI9 NPNT_HUMAN Nephronectin Q6UXI9,A6NFT9,A8K1W4,B4DIT4,B4DYK3,B4E2H7,B4E3H2,D6RCA1,E9PCK8,E9PCQ1,E9PE64,E9PF04 Preosteoblast EGF-like repeat protein with MAM domain, Protein EGFL6-like EGFL6L, POEM	basement membrane, collagen-containing extracellular matrix, extracellular exosome, extracellular region, integrin alpha8-beta1 complex, smooth muscle contractile fiber	nephronectin family	http://zinc.docking.org/results/combination?filter.purchasability=purchasable&annotation.name=NPNT_HUMAN	http://cansar.icr.ac.uk/cansar/molecular-targets/Q6UXI9/				0	0	0	0	0	0	0	1.05	91
	P52566	ARHGDIB	Rho GDP-dissociation inhibitor 2		GDIR2_HUMAN, ARHGDIB, GDIA2, GDID4, RAP1GN1	Cytoplasm, Cytosol	P52566 GDIR2_HUMAN Rho GDP-dissociation inhibitor 2 P52566,B5BU79 Ly-GDI, Rho-GDI beta GDIA2, GDID4, RAP1GN1	cytoplasm, cytoplasmic vesicle, cytoskeleton, cytosol, extracellular exosome, membrane	Rho GDI family	http://zinc.docking.org/results/combination?filter.purchasability=purchasable&annotation.name=GDIR2_HUMAN	http://cansar.icr.ac.uk/cansar/molecular-targets/P52566/				2	0	2	1	50	2	100	-3	59
	Q03001	DST	Dystonin		DYST_HUMAN, DST, BP230, BP240, BPAG1, DMH, DT, KIAA0728	Cytoplasm, Cytoskeleton, Cytoplasm, Cytoskeleton, Stress fiber, Cell projection, Axon, Cytoplasm, Cytoskeleton, Cytoplasm, Myofibril, Sarcomere, Z line, Cytoplasm, Myofibril, Sarcomere, H zone, Cytoplasm, Cytoskeleton, Cytoplasm, Cytoskeleton, Cell junction, Hemidesmosome, Nucleus, Nucleus envelope, Membrane, Endoplasmic reticulum membrane, Cytoplasm, Cytoskeleton, Cytoplasm, Cytoskeleton, Stress…	Q03001 DYST_HUMAN Dystonin Q03001,B7Z3H1,E7ERU0,O94833,Q12825,Q13266,Q13267,Q13775,Q5TBT0,Q5TBT2,Q5TF23,Q5TF24,Q8N1T8,Q8N8J3,Q8WXK8,Q8WXK9,Q96AK9,Q96DQ5,Q96J76,Q96QT5,Q9H555,Q9UGD7,Q9UGD8,Q9UN10 230 kDa bullous pemphigoid antigen, 230/240 kDa bullous pemphigoid antigen, Bullous pemphigoid antigen 1, Dystonia musculorum protein, Hemidesmosomal plaque protein BP230, BP240, BPAG1, DMH, DT, KIAA0728	actin cytoskeleton, axon, axon cytoplasm, basal plasma membrane, basement membrane, cell cortex, cell leading edge, cytoplasm, cytoplasmic vesicle, cytosol, endoplasmic reticulum membrane, focal adhesion, h zone, hemidesmosome, integral component of membrane, intermediate filament, intermediate filament cytoskeleton, membrane, microtubule cytoskeleton, microtubule plus-end, nuclear envelope, nucl…		http://zinc.docking.org/results/combination?filter.purchasability=purchasable&annotation.name=DYST_HUMAN	http://cansar.icr.ac.uk/cansar/molecular-targets/Q03001/				1	0	0	0	0	0	0	1.3	93
	P42892	ECE1	Endothelin-converting enzyme 1	3.4.24.71	ECE1_HUMAN, ECE1	Cell membrane	P42892 ECE1_HUMAN Endothelin-converting enzyme 1 P42892,A8K3P1,B4E291,Q14217,Q17RN5,Q2Z2K8,Q58GE7,Q5THM5,Q5THM7,Q5THM8,Q9UJQ6,Q9UPF4,Q9UPM4,Q9Y501	early endosome, endosome, external side of plasma membrane, extracellular exosome, integral component of membrane, intrinsic component of endosome membrane, lysosomal membrane, membrane, perinuclear region of cytoplasm, plasma membrane, vesicle, weibel-palade body	peptidase M13 family	http://zinc.docking.org/results/combination?filter.purchasability=purchasable&annotation.name=ECE1_HUMAN	http://cansar.icr.ac.uk/cansar/molecular-targets/P42892/	39.35|P08473|MME|Sacubitril|Whole:::Protein		39.35|P08473|MME|Sacubitril|Whole:::Protein	1	1	1	1	100	1	100	0.8	88	1	525	81	48	222	43	25
	Q10589	BST2	Bone marrow stromal antigen 2		BST2_HUMAN, BST2	Golgi apparatus, Trans-Golgi network, Cell membrane, Cell membrane, Membrane raft, Cytoplasm, Apical cell membrane, Golgi apparatus, Trans-Golgi network, Late endosome	Q10589 BST2_HUMAN Bone marrow stromal antigen 2 Q10589,A8K4Y4,Q53G07 HM1.24 antigen, Tetherin	anchored component of membrane, apical plasma membrane, azurophil granule membrane, cell surface, cytosol, extracellular exosome, golgi apparatus, integral component of membrane, membrane, membrane raft, multivesicular body, plasma membrane	tetherin family	http://zinc.docking.org/results/combination?filter.purchasability=purchasable&annotation.name=BST2_HUMAN	http://cansar.icr.ac.uk/cansar/molecular-targets/Q10589/				14	1	9	1	12	3	34	-3	59
	O00468	AGRN	Agrin		AGRIN_HUMAN, AGRN, AGRIN	Secreted, Extracellular space, Extracellular matrix, Cell junction, Synapse, Cell membrane	O00468 AGRIN_HUMAN Agrin O00468,Q5SVA1,Q5SVA2,Q60FE1,Q7KYS8,Q8N4J5,Q96IC1,Q9BTD4 AGRIN	basement membrane, collagen-containing extracellular matrix, cytosol, extracellular exosome, extracellular region, golgi lumen, integral component of membrane, lysosomal lumen, plasma membrane, synapse		http://zinc.docking.org/results/combination?filter.purchasability=purchasable&annotation.name=AGRIN_HUMAN	http://cansar.icr.ac.uk/cansar/molecular-targets/O00468/				0	0	0	0	0	0	0	0.8	88
	Q9NRX5	SERINC1	Serine incorporator 1		SERC1_HUMAN, SERINC1, KIAA1253, TDE1L, TDE2	Endoplasmic reticulum membrane	Q9NRX5 SERC1_HUMAN Serine incorporator 1 Q9NRX5,B3KY69,E1P565,O75655,Q7Z2F5,Q8TAG1,Q9NTH8,Q9ULG7 Tumor differentially expressed protein 1-like, Tumor differentially expressed protein 2 KIAA1253, TDE1L, TDE2	endoplasmic reticulum membrane, integral component of membrane, membrane, plasma membrane	TDE1 family	http://zinc.docking.org/results/combination?filter.purchasability=purchasable&annotation.name=SERC1_HUMAN	http://cansar.icr.ac.uk/cansar/molecular-targets/Q9NRX5/				0	0	0	0	0	0	0	-3	59
	P35268	RPL22	60S ribosomal protein L22		RL22_HUMAN, RPL22		P35268 RL22_HUMAN 60S ribosomal protein L22 P35268,B2R495,Q6IBD1 EBER-associated protein, Epstein-Barr virus small RNA-associated protein, Heparin-binding protein HBp15, Large ribosomal subunit protein eL22	cytoplasm, cytosol, cytosolic large ribosomal subunit, extracellular exosome, focal adhesion, nucleus, ribonucleoprotein complex	eukaryotic ribosomal protein eL22 family	http://zinc.docking.org/results/combination?filter.purchasability=purchasable&annotation.name=RL22_HUMAN	http://cansar.icr.ac.uk/cansar/molecular-targets/P35268/				0	0	0	0	0	0	0	-3	59	1	18	0	0	12	0	0
	Q92597	NDRG1	Protein NDRG1		NDRG1_HUMAN, NDRG1, CAP43, DRG1, RTP	Cytoplasm, Cytosol, Cytoplasm, Cytoskeleton, Microtubule organizing center, Centrosome, Nucleus, Cell membrane	Q92597 NDRG1_HUMAN Protein NDRG1 Q92597,B3KR80,B7Z446,O15207,Q6IBG2,Q9NYR6,Q9UK29 Differentiation-related gene 1 protein, N-myc downstream-regulated gene 1 protein, Nickel-specific induction protein Cap43, Reducing agents and tunicamycin-responsive protein, Rit42 CAP43, DRG1, RTP	adherens junction, centrosome, cytoplasm, cytosol, extracellular exosome, glutamatergic synapse, microtubule, microtubule cytoskeleton, nucleus, perinuclear region of cytoplasm, plasma membrane, recycling endosome membrane	NDRG family	http://zinc.docking.org/results/combination?filter.purchasability=purchasable&annotation.name=NDRG1_HUMAN	http://cansar.icr.ac.uk/cansar/molecular-targets/Q92597/				0	0	0	0	0	0	0	-3	59	1	2	0	0	2	0	0
	Q96JA1	LRIG1	Leucine-rich repeats and immunoglobulin-like domains protein 1		LRIG1_HUMAN, LRIG1, LIG1	Cell membrane	Q96JA1 LRIG1_HUMAN Leucine-rich repeats and immunoglobulin-like domains protein 1 Q96JA1,Q6IQ51,Q96CF9,Q9BYB8,Q9UFI4 LIG1	extracellular matrix, extracellular space, integral component of membrane, plasma membrane		http://zinc.docking.org/results/combination?filter.purchasability=purchasable&annotation.name=LRIG1_HUMAN	http://cansar.icr.ac.uk/cansar/molecular-targets/Q96JA1/	30.43|P22455|FGFR4|Erdafitinib|Whole:::Protein			2	2	2	0	0	0	0	-0.9	70
	Q16651	PRSS8	Prostasin	3.4.21.-	PRSS8_HUMAN, PRSS8	Cell membrane, Secreted, Extracellular space, Secreted, Extracellular space	Q16651 PRSS8_HUMAN Prostasin Q16651,B4DWP2,Q9UCA3 Channel-activating protease 1, Serine protease 8	extracellular exosome, extracellular region, extracellular space, integral component of membrane, plasma membrane	peptidase S1 family	http://zinc.docking.org/results/combination?filter.purchasability=purchasable&annotation.name=PRSS8_HUMAN	http://cansar.icr.ac.uk/cansar/molecular-targets/Q16651/	37.86|P00747|PLG|Urokinase,Tranexamic Acid,Aprotinin,Aminocaproic Acid,Alteplase|Whole:::Protein		37.86|P00747|PLG|Urokinase,Tranexamic Acid,Aprotinin,Aminocaproic Acid,Alteplase|Whole:::Protein||35.71|P00734|F2|Lepirudin,Desirudin,Dabigatran Etexilate,Dabigatran Etexilate Mesylate,Bivalirudin,Argatroban,Antithrombin Alfa|Whole:::Protein	9	5	9	3	34	9	100	-0.9	70	1	25	9	0	16	4	0
	P36955	SERPINF1	Pigment epithelium-derived factor		PEDF_HUMAN, SERPINF1, PEDF	Secreted, Melanosome	P36955 PEDF_HUMAN Pigment epithelium-derived factor P36955,F1T092,Q13236,Q2TU83,Q96CT1,Q96R01,Q9BWA4 Cell proliferation-inducing gene 35 protein, EPC-1, Serpin F1 PEDF	axon hillock, basement membrane, collagen-containing extracellular matrix, extracellular exosome, extracellular region, extracellular space, melanosome, perinuclear region of cytoplasm	serpin family	http://zinc.docking.org/results/combination?filter.purchasability=purchasable&annotation.name=PEDF_HUMAN	http://cansar.icr.ac.uk/cansar/molecular-targets/P36955/				1	1	1	1	100	1	100	-3	59
	Q15363	TMED2	Transmembrane emp24 domain-containing protein 2		TMED2_HUMAN, TMED2, RNP24	Cytoplasmic vesicle membrane, Cytoplasmic vesicle, COPI-coated vesicle membrane, Golgi apparatus, Cis-Golgi network membrane, Golgi apparatus, Golgi stack membrane, Endoplasmic reticulum membrane, Endoplasmic reticulum-Golgi intermediate compartment membrane	Q15363 TMED2_HUMAN Transmembrane emp24 domain-containing protein 2 Q15363 Membrane protein p24A, p24, p24 family protein beta-1 RNP24	copi-coated vesicle, copi-coated vesicle membrane, copii-coated er to golgi transport vesicle, endoplasmic reticulum, endoplasmic reticulum membrane, endoplasmic reticulum-golgi intermediate compartment, endoplasmic reticulum-golgi intermediate compartment membrane, er to golgi transport vesicle membrane, golgi apparatus, golgi cisterna membrane, golgi membrane, integral component of membrane, in…	EMP24/GP25L family	http://zinc.docking.org/results/combination?filter.purchasability=purchasable&annotation.name=TMED2_HUMAN	http://cansar.icr.ac.uk/cansar/molecular-targets/Q15363/				1	0	1	0	0	0	0	-3	59
	Q8NFJ5	GPRC5A	Retinoic acid-induced protein 3		RAI3_HUMAN, GPRC5A, GPCR5A, RAI3, RAIG1	Cell membrane, Cytoplasmic vesicle membrane	Q8NFJ5 RAI3_HUMAN Retinoic acid-induced protein 3 Q8NFJ5,B3KV45,O95357 G-protein coupled receptor family C group 5 member A, Phorbol ester induced gene 1, Retinoic acid-induced gene 1 protein GPCR5A, RAI3, RAIG1	cytoplasmic vesicle membrane, extracellular exosome, integral component of plasma membrane, intracellular membrane-bounded organelle, nucleolus, plasma membrane, receptor complex, vesicle	G-protein coupled receptor 3 family	http://zinc.docking.org/results/combination?filter.purchasability=purchasable&annotation.name=RAI3_HUMAN	http://cansar.icr.ac.uk/cansar/molecular-targets/Q8NFJ5/				0	0	0	0	0	0	0	-3	59
	P18084	ITGB5	Integrin beta-5		ITB5_HUMAN, ITGB5	Membrane	P18084 ITB5_HUMAN Integrin beta-5 P18084,B0LPF8,B2RD70	cell surface, extracellular exosome, focal adhesion, integrin alphav-beta5 complex, phagocytic vesicle, plasma membrane, receptor complex	integrin beta chain family	http://zinc.docking.org/results/combination?filter.purchasability=purchasable&annotation.name=ITB5_HUMAN	http://cansar.icr.ac.uk/cansar/molecular-targets/P18084/	55.53|P05106|ITGB3|Tirofiban,Tirofiban Hydrochloride,Eptifibatide,Abciximab|Whole:::Protein	55.53|P05106|ITGB3|Tirofiban,Tirofiban Hydrochloride,Eptifibatide,Abciximab|Whole:::Protein	55.53|P05106|ITGB3|Tirofiban,Tirofiban Hydrochloride,Eptifibatide,Abciximab|Whole:::Protein||38.56|P05107|ITGB2|Lifitegrast|Whole:::Protein	0	0	0	0	0	0	0	0.65	86	1	379	151	75	185	94	56
	Q76M96	CCDC80	Coiled-coil domain-containing protein 80		CCD80_HUMAN, CCDC80, DRO1, URB	Secreted, Extracellular space, Extracellular matrix	Q76M96 CCD80_HUMAN Coiled-coil domain-containing protein 80 Q76M96,D3DN67,Q5PR20,Q6GPG9,Q8IVT6,Q8NBV1,Q8NHY8 Down-regulated by oncogenes protein 1, Up-regulated in BRS-3 deficient mouse homolog DRO1, URB	basement membrane, interstitial matrix	CCDC80 family	http://zinc.docking.org/results/combination?filter.purchasability=purchasable&annotation.name=CCD80_HUMAN	http://cansar.icr.ac.uk/cansar/molecular-targets/Q76M96/				0	0	0	0	0	0	0	-3	59
	Q7Z429	GRINA	Protein lifeguard 1		LFG1_HUMAN, GRINA, LFG1, NMDARA1, TMBIM3	Membrane	Q7Z429 LFG1_HUMAN Protein lifeguard 1 Q7Z429,B3KXM7,O43836,Q8IVW7 Glutamate [NMDA] receptor-associated protein 1, NMDA receptor glutamate-binding subunit, Putative MAPK-activating protein PM02, Transmembrane BAX inhibitor motif-containing protein 3 LFG1, NMDARA1, TMBIM3	endoplasmic reticulum, golgi apparatus, integral component of membrane	BI1 family	http://zinc.docking.org/results/combination?filter.purchasability=purchasable&annotation.name=LFG1_HUMAN	http://cansar.icr.ac.uk/cansar/molecular-targets/Q7Z429/				0	0	0	0	0	0	0	2.15	97
	Q9Y490	TLN1	Talin-1		TLN1_HUMAN, TLN1, KIAA1027, TLN	Cell projection, Ruffle membrane, Cytoplasm, Cytoskeleton, Cell surface, Cell junction, Focal adhesion	Q9Y490 TLN1_HUMAN Talin-1 Q9Y490,A6NMY0,Q86YD0,Q9NZQ2,Q9UHH8,Q9UPX3 KIAA1027, TLN	adherens junction, cell surface, cytoskeleton, cytosol, extracellular exosome, extracellular region, focal adhesion, plasma membrane, ruffle, ruffle membrane		http://zinc.docking.org/results/combination?filter.purchasability=purchasable&annotation.name=TLN1_HUMAN	http://cansar.icr.ac.uk/cansar/molecular-targets/Q9Y490/				6	0	4	1	25	2	50	-0.5	74
	P15291	B4GALT1	Beta-1,4-galactosyltransferase 1	2.4.1.-	B4GT1_HUMAN, B4GALT1, GGTB2	Golgi apparatus, Golgi stack membrane, Cell membrane, Cell surface, Cell projection, Filopodium, Golgi apparatus, Golgi stack membrane, Secreted	P15291 B4GT1_HUMAN Beta-1,4-galactosyltransferase 1 P15291,B2R710,D3DRL2,Q12909,Q12910,Q12911,Q14456,Q14509,Q14523 Beta-N-acetylglucosaminyl-glycolipid beta-1,4-galactosyltransferase, Beta-N-acetylglucosaminylglycopeptide beta-1,4-galactosyltransferase, Lactose synthase A protein, N-acetyllactosamine synthase, Nal synthase, Neolactotriaosylceramide beta-1,4-galactosyltransferase, UDP-Gal:beta-Glc…	azurophil granule membrane, basolateral plasma membrane, brush border membrane, desmosome, external side of plasma membrane, extracellular exosome, extracellular space, filopodium, golgi apparatus, golgi cisterna membrane, golgi membrane, golgi trans cisterna, integral component of membrane, membrane, plasma membrane, secretory granule membrane	glycosyltransferase 7 family	http://zinc.docking.org/results/combination?filter.purchasability=purchasable&annotation.name=B4GT1_HUMAN	http://cansar.icr.ac.uk/cansar/molecular-targets/P15291/				19	16	19	16	85	19	100	-3	59	1	36	0	0	34	0	0
	P40189	IL6ST	Interleukin-6 receptor subunit beta		IL6RB_HUMAN, IL6ST	Cell membrane, Secreted	P40189 IL6RB_HUMAN Interleukin-6 receptor subunit beta P40189,A0N0L4,Q5FC04,Q9UQ41 CDw130, Interleukin-6 signal transducer, Membrane glycoprotein 130, Oncostatin-M receptor subunit alpha	ciliary neurotrophic factor receptor complex, dendrite, external side of plasma membrane, extracellular exosome, extracellular region, extracellular space, interleukin-6 receptor complex, membrane, neuronal cell body, oncostatin-m receptor complex, plasma membrane, receptor complex	type I cytokine receptor family	http://zinc.docking.org/results/combination?filter.purchasability=purchasable&annotation.name=IL6RB_HUMAN	http://cansar.icr.ac.uk/cansar/molecular-targets/P40189/	27.85|Q99062|CSF3R|Pegfilgrastim,Lipegfilgrastim,Filgrastim|Whole:::Protein			8	0	8	3	38	6	75	0.25	82	1	18	0	0	8	0	0
	Q14444	CAPRIN1	Caprin-1		CAPR1_HUMAN, CAPRIN1, GPIAP1, GPIP137, M11S1, RNG105	Cytoplasm, Cytosol, Cell projection, Dendrite, Cell projection, Lamellipodium	Q14444 CAPR1_HUMAN Caprin-1 Q14444,A6NMY7,D3DR06,Q15074,Q6IMN4,Q6IMN7,Q9BV09 Cell cycle-associated protein 1, Cytoplasmic activation- and proliferation-associated protein 1, GPI-anchored membrane protein 1, GPI-anchored protein p137, Membrane component chromosome 11 surface marker 1, RNA granule protein 105 GPIAP1, GPIP137, M11S1, RNG105	cell leading edge, cytoplasm, cytoplasmic stress granule, cytosol, dendrite, lamellipodium, membrane, p-body, synapse	caprin family	http://zinc.docking.org/results/combination?filter.purchasability=purchasable&annotation.name=CAPR1_HUMAN	http://cansar.icr.ac.uk/cansar/molecular-targets/Q14444/				2	0	2	0	0	2	100	-3	59
	Q9P2E9	RRBP1	Ribosome-binding protein 1		RRBP1_HUMAN, RRBP1, KIAA1398	Endoplasmic reticulum membrane	Q9P2E9 RRBP1_HUMAN Ribosome-binding protein 1 Q9P2E9,A0A0A0MRV0,A2A2S6,A6NCN6,O75300,O75301,Q5W165,Q96SB2,Q9BWP1,Q9H476 180 kDa ribosome receptor homolog, ES/130-related protein, Ribosome receptor protein KIAA1398	endoplasmic reticulum, integral component of endoplasmic reticulum membrane, membrane, ribosome		http://zinc.docking.org/results/combination?filter.purchasability=purchasable&annotation.name=RRBP1_HUMAN	http://cansar.icr.ac.uk/cansar/molecular-targets/Q9P2E9/				0	0	0	0	0	0	0	-3	59
	P08134	RHOC	Rho-related GTP-binding protein RhoC		RHOC_HUMAN, RHOC, ARH9, ARHC	Cell membrane, Cleavage furrow	P08134 RHOC_HUMAN Rho-related GTP-binding protein RhoC P08134,B3KSW1,Q6ICN3 Rho cDNA clone 9 ARH9, ARHC	cleavage furrow, cytoplasm, cytosol, extracellular exosome, neuron projection, plasma membrane, stereocilium	Rho family	http://zinc.docking.org/results/combination?filter.purchasability=purchasable&annotation.name=RHOC_HUMAN	http://cansar.icr.ac.uk/cansar/molecular-targets/P08134/				4	4	4	1	25	4	100	-1.6	63
	Q8N8S7	ENAH	Protein enabled homolog		ENAH_HUMAN, ENAH, MENA	Cytoplasm, Cytoplasm, Cytoskeleton, Cell projection, Lamellipodium, Cell projection, Filopodium, Cell junction, Synapse, Cell junction, Focal adhesion	Q8N8S7 ENAH_HUMAN Protein enabled homolog Q8N8S7,D0PQI2,Q502W5,Q5T5M7,Q5VTQ9,Q5VTR0,Q9NVF3,Q9UFB8 MENA	cell junction, cytoskeleton, cytosol, filopodium, focal adhesion, lamellipodium, plasma membrane, synapse	Ena/VASP family	http://zinc.docking.org/results/combination?filter.purchasability=purchasable&annotation.name=ENAH_HUMAN	http://cansar.icr.ac.uk/cansar/molecular-targets/Q8N8S7/				23	11	22	0	0	13	60	-3	59
	P17302	GJA1	Gap junction alpha-1 protein		CXA1_HUMAN, GJA1, GJAL	Cell membrane, Cell junction, Gap junction, Endoplasmic reticulum	P17302 CXA1_HUMAN Gap junction alpha-1 protein P17302,B2R5U9,Q6FHU1,Q9Y5I8 Connexin-43, Gap junction 43 kDa heart protein GJAL	apical plasma membrane, cell junction, cell-cell contact zone, connexin complex, cytoplasm, early endosome, endoplasmic reticulum membrane, fascia adherens, focal adhesion, gap junction, golgi apparatus, golgi membrane, golgi-associated vesicle membrane, integral component of plasma membrane, intercalated disc, intracellular membrane-bounded organelle, lysosome, membrane raft, mitochondrial outer…	connexin family	http://zinc.docking.org/results/combination?filter.purchasability=purchasable&annotation.name=CXA1_HUMAN	http://cansar.icr.ac.uk/cansar/molecular-targets/P17302/				1	0	0	0	0	0	0	0.9	89
	P35221	CTNNA1	Catenin alpha-1		CTNA1_HUMAN, CTNNA1	Cytoplasm, Cytoskeleton, Cell junction, Adherens junction, Cell membrane, Cell junction, Cell membrane	P35221 CTNA1_HUMAN Catenin alpha-1 P35221,Q12795,Q8N1C0 Alpha E-catenin, Cadherin-associated protein, Renal carcinoma antigen NY-REN-13	acrosomal vesicle, actin cytoskeleton, catenin complex, cell junction, cell-cell junction, cytosol, flotillin complex, focal adhesion, intercalated disc, intracellular membrane-bounded organelle, lamellipodium, plasma membrane, zonula adherens	vinculin/alpha-catenin family	http://zinc.docking.org/results/combination?filter.purchasability=purchasable&annotation.name=CTNA1_HUMAN	http://cansar.icr.ac.uk/cansar/molecular-targets/P35221/				9	0	6	2	34	4	67	-3	59
	P54851	EMP2	Epithelial membrane protein 2		EMP2_HUMAN, EMP2, XMP	Golgi apparatus membrane, Cell membrane, Apical cell membrane, Membrane raft, Cytoplasm, Nucleus	P54851 EMP2_HUMAN Epithelial membrane protein 2 P54851,B2R7V6,D3DUF8 Protein XMP XMP	apical part of cell, apical plasma membrane, cell surface, cytoplasm, cytoplasmic vesicle, cytosol, golgi apparatus, golgi membrane, integral component of membrane, membrane raft, nucleus, plasma membrane	PMP-22/EMP/MP20 family	http://zinc.docking.org/results/combination?filter.purchasability=purchasable&annotation.name=EMP2_HUMAN	http://cansar.icr.ac.uk/cansar/molecular-targets/P54851/				0	0	0	0	0	0	0	-0.8	71
	P53804	TTC3	E3 ubiquitin-protein ligase TTC3	2.3.2.27	TTC3_HUMAN, TTC3, DCRR1, RNF105, TPRD	Nucleus, Cytoplasm, Golgi apparatus	P53804 TTC3_HUMAN E3 ubiquitin-protein ligase TTC3 P53804,A8K7H7,B2RPA7,D3DSG9,D3DSH2,D3DSH3,O60767,P78476,P78477,Q569I2,Q6P578,Q9UEK4 Protein DCRR1, RING finger protein 105, RING-type E3 ubiquitin transferase TTC3, TPR repeat protein D, Tetratricopeptide repeat protein 3 DCRR1, RNF105, TPRD	cytosol, golgi apparatus, nucleolus, nucleoplasm, nucleus		http://zinc.docking.org/results/combination?filter.purchasability=purchasable&annotation.name=TTC3_HUMAN	http://cansar.icr.ac.uk/cansar/molecular-targets/P53804/				0	0	0	0	0	0	0	-1.85	60
	P39060	COL18A1	Collagen alpha-1(XVIII) chain		COIA1_HUMAN, COL18A1	Secreted, Extracellular space, Extracellular matrix, Secreted, Extracellular space, Extracellular matrix, Basement membrane, Secreted, Extracellular space, Extracellular matrix, Basement membrane, Secreted, Secreted, Secreted, Extracellular space, Extracellular matrix, Basement membrane	P39060 COIA1_HUMAN Collagen alpha-1(XVIII) chain P39060,A8MVI4,Q58EX6,Q6RZ39,Q6RZ40,Q6RZ41,Q8N4S4,Q8WXI5,Q96T70,Q9UK38,Q9Y6Q7,Q9Y6Q8	basement membrane, collagen trimer, collagen-containing extracellular matrix, endoplasmic reticulum lumen, extracellular exosome, extracellular matrix, extracellular region, extracellular space	multiplexin collagen family	http://zinc.docking.org/results/combination?filter.purchasability=purchasable&annotation.name=COIA1_HUMAN	http://cansar.icr.ac.uk/cansar/molecular-targets/P39060/				3	0	3	0	0	1	34	-0.1	78
	P18621	RPL17	60S ribosomal protein L17		RL17_HUMAN, RPL17		P18621 RL17_HUMAN 60S ribosomal protein L17 P18621,B2R4H3,B4E3C2,B5ME31,J3QL51,Q3KQW2,Q6NZ54,Q7M4M5 60S ribosomal protein L23, Large ribosomal subunit protein uL22, PD-1	cytosol, cytosolic large ribosomal subunit, nucleus	universal ribosomal protein uL22 family	http://zinc.docking.org/results/combination?filter.purchasability=purchasable&annotation.name=RL17_HUMAN	http://cansar.icr.ac.uk/cansar/molecular-targets/P18621/				1	0	0	0	0	0	0	-3	59
	Q9NZM1	MYOF	Myoferlin		MYOF_HUMAN, MYOF, FER1L3, KIAA1207	Cell membrane, Nucleus membrane, Cytoplasmic vesicle membrane	Q9NZM1 MYOF_HUMAN Myoferlin Q9NZM1,B3KQN5,Q5VWW2,Q5VWW3,Q5VWW4,Q5VWW5,Q7Z642,Q8IWH0,Q9HBU3,Q9NZM0,Q9ULL3,Q9Y4U4 Fer-1-like protein 3 FER1L3, KIAA1207	caveola, cytoplasmic vesicle, cytoplasmic vesicle membrane, extracellular exosome, integral component of membrane, intracellular membrane-bounded organelle, nuclear envelope, nuclear membrane, plasma membrane	ferlin family	http://zinc.docking.org/results/combination?filter.purchasability=purchasable&annotation.name=MYOF_HUMAN	http://cansar.icr.ac.uk/cansar/molecular-targets/Q9NZM1/				3	0	3	0	0	2	67	-1.85	60
	O15031	PLXNB2	Plexin-B2		PLXB2_HUMAN, PLXNB2, KIAA0315	Cell membrane	O15031 PLXB2_HUMAN Plexin-B2 O15031,A6QRH0,Q7KZU3,Q9BSU7 MM1 KIAA0315	cell surface, extracellular exosome, integral component of plasma membrane, semaphorin receptor complex	plexin family	http://zinc.docking.org/results/combination?filter.purchasability=purchasable&annotation.name=PLXB2_HUMAN	http://cansar.icr.ac.uk/cansar/molecular-targets/O15031/	26.41|P08581|MET|Crizotinib,Capmatinib,CABOZANTINIB S-MALATE,Cabozantinib|Whole:::Protein			1	0	1	0	0	0	0	-0.65	72
	Q7Z6Z7	HUWE1	E3 ubiquitin-protein ligase HUWE1	2.3.2.26	HUWE1_HUMAN, HUWE1, KIAA0312, KIAA1578, UREB1	Cytoplasm, Nucleus	Q7Z6Z7 HUWE1_HUMAN E3 ubiquitin-protein ligase HUWE1 Q7Z6Z7,O15029,Q4G2Z2,Q5H961,Q6P4D0,Q8NG67,Q9BUI0,Q9HCJ4,Q9NSL6,Q9P0A9 ARF-binding protein 1, HECT, UBA and WWE domain-containing protein 1, HECT-type E3 ubiquitin transferase HUWE1, Homologous to E6AP carboxyl terminus homologous protein 9, Large structure of UREB1, Mcl-1 ubiquitin ligase E3, Upstream regulatory element-binding protein 1 KIAA03…	cytoplasm, cytosol, extracellular exosome, extracellular region, ficolin-1-rich granule lumen, membrane, nucleoplasm, nucleus, secretory granule lumen	UPL family	http://zinc.docking.org/results/combination?filter.purchasability=purchasable&annotation.name=HUWE1_HUMAN	http://cansar.icr.ac.uk/cansar/molecular-targets/Q7Z6Z7/				9	2	8	3	38	4	50	0.45	84	1	1	0	0	1	0	0
	P06744	GPI	Glucose-6-phosphate isomerase	5.3.1.9	G6PI_HUMAN, GPI	Cytoplasm, Secreted	P06744 G6PI_HUMAN Glucose-6-phosphate isomerase P06744,B4DG39,Q9BRD3,Q9BSK5,Q9UHE6 Autocrine motility factor, Neuroleukin, Phosphoglucose isomerase, Phosphohexose isomerase, Sperm antigen 36	cytosol, extracellular exosome, extracellular region, ficolin-1-rich granule lumen, membrane, nucleoplasm, plasma membrane, secretory granule lumen	GPI family	http://zinc.docking.org/results/combination?filter.purchasability=purchasable&annotation.name=G6PI_HUMAN	http://cansar.icr.ac.uk/cansar/molecular-targets/P06744/				7	4	7	5	72	7	100	-1.7	61
	Q99985	SEMA3C	Semaphorin-3C		SEM3C_HUMAN, SEMA3C, SEMAE	Secreted	Q99985 SEM3C_HUMAN Semaphorin-3C Q99985,B4DRL8 Semaphorin-E SEMAE	extracellular exosome, extracellular space, integral component of plasma membrane	semaphorin family	http://zinc.docking.org/results/combination?filter.purchasability=purchasable&annotation.name=SEM3C_HUMAN	http://cansar.icr.ac.uk/cansar/molecular-targets/Q99985/				0	0	0	0	0	0	0	0.45	84
	P17655	CAPN2	Calpain-2 catalytic subunit	3.4.22.53	CAN2_HUMAN, CAPN2, CANPL2	Cytoplasm, Cell membrane	P17655 CAN2_HUMAN Calpain-2 catalytic subunit P17655,A6NDG7,B7ZA96,E7ES58,Q16738,Q6PJT3,Q8WU26,Q9HBB1 Calcium-activated neutral proteinase 2, Calpain M-type, Calpain large polypeptide L2, Calpain-2 large subunit, Millimolar-calpain CANPL2	chromatin, cortical actin cytoskeleton, cytoplasm, cytosol, dendrite, endoplasmic reticulum, external side of plasma membrane, extracellular exosome, focal adhesion, golgi apparatus, lysosome, membrane raft, mitochondrial intermembrane space, neuronal cell body, nucleus, perinuclear endoplasmic reticulum, plasma membrane, pseudopodium	peptidase C2 family	http://zinc.docking.org/results/combination?filter.purchasability=purchasable&annotation.name=CAN2_HUMAN	http://cansar.icr.ac.uk/cansar/molecular-targets/P17655/				3	0	3	3	100	3	100	0.85	89	1	188	34	23	95	20	12
	O95238	SPDEF	SAM pointed domain-containing Ets transcription factor		SPDEF_HUMAN, SPDEF, PDEF, PSE	Nucleus	O95238 SPDEF_HUMAN SAM pointed domain-containing Ets transcription factor O95238,B4DWH8,F5H778 Prostate epithelium-specific Ets transcription factor, Prostate-derived Ets factor PDEF, PSE	host cell nucleus, nuclear chromatin, nucleus	ETS family	http://zinc.docking.org/results/combination?filter.purchasability=purchasable&annotation.name=SPDEF_HUMAN	http://cansar.icr.ac.uk/cansar/molecular-targets/O95238/				2	0	2	0	0	0	0	-3	59
	P09619	PDGFRB	Platelet-derived growth factor receptor beta	2.7.10.1	PGFRB_HUMAN, PDGFRB, PDGFR, PDGFR1	Cell membrane, Cytoplasmic vesicle, Lysosome lumen	P09619 PGFRB_HUMAN Platelet-derived growth factor receptor beta P09619,B5A957,Q8N5L4 Beta platelet-derived growth factor receptor, Beta-type platelet-derived growth factor receptor, CD140 antigen-like family member B, Platelet-derived growth factor receptor 1 PDGFR, PDGFR1	apical plasma membrane, cell surface, cytoplasm, cytoplasmic vesicle, focal adhesion, golgi apparatus, integral component of plasma membrane, intracellular membrane-bounded organelle, intrinsic component of plasma membrane, lysosomal lumen, membrane, nucleus, plasma membrane, receptor complex, ruffle	Tyr protein kinase family	http://zinc.docking.org/results/combination?filter.purchasability=purchasable&annotation.name=PGFRB_HUMAN	http://cansar.icr.ac.uk/cansar/molecular-targets/P09619/	100.00|P09619|PDGFRB|Sunitinib Malate,Sunitinib,Sorafenib Tosylate,Sorafenib,Regorafenib,Pazopanib Hydrochloride,Pazopanib,Imatinib Mesylate,Imatinib,Dasatinib,Becaplermin,Axitinib|Whole:::Protein	100.00|P09619|PDGFRB|Sunitinib Malate,Sunitinib,Sorafenib Tosylate,Sorafenib,Regorafenib,Pazopanib Hydrochloride,Pazopanib,Imatinib Mesylate,Imatinib,Dasatinib,Becaplermin,Axitinib|Whole:::Protein||55.13|P11362|FGFR1|Vandetanib,Pemigatinib,Pazopanib Hydrochloride,Pazopanib,Erdafitinib|Whole:::Protein||53.85|P22607|FGFR3|Vandetanib,Pemigatinib,Pazopanib Hydrochloride,Pazopanib,Erdafitinib|Whole:::…	100.00|P09619|PDGFRB|Sunitinib Malate,Sunitinib,Sorafenib Tosylate,Sorafenib,Regorafenib,Pazopanib Hydrochloride,Pazopanib,Imatinib Mesylate,Imatinib,Dasatinib,Becaplermin,Axitinib|Whole:::Protein||55.13|P11362|FGFR1|Vandetanib,Pemigatinib,Pazopanib Hydrochloride,Pazopanib,Erdafitinib|Whole:::Protein||53.85|P22607|FGFR3|Vandetanib,Pemigatinib,Pazopanib Hydrochloride,Pazopanib,Erdafitinib|Whole:::…	7	1	2	0	0	1	50	1.8	96	1	3987	763	389	1944	338	185
	Q9H3Y8	PPDPF	Pancreatic progenitor cell differentiation and proliferation factor		PPDPF_HUMAN, PPDPF, C20orf149, EXPDF		Q9H3Y8 PPDPF_HUMAN Pancreatic progenitor cell differentiation and proliferation factor Q9H3Y8,E1P5J2,Q4VXP1,Q9H3Y7 Exocrine differentiation and proliferation factor C20orf149, EXPDF		PPDPF family	http://zinc.docking.org/results/combination?filter.purchasability=purchasable&annotation.name=PPDPF_HUMAN	http://cansar.icr.ac.uk/cansar/molecular-targets/Q9H3Y8/				0	0	0	0	0	0	0	-3	59
	Q04637	EIF4G1	Eukaryotic translation initiation factor 4 gamma 1		IF4G1_HUMAN, EIF4G1, EIF4F, EIF4G, EIF4GI	Cytoplasm, Stress granule	Q04637 IF4G1_HUMAN Eukaryotic translation initiation factor 4 gamma 1 Q04637,D3DNT2,D3DNT4,D3DNT5,E9PFM1,G5E9S1,O43177,O95066,Q5HYG0,Q6ZN21,Q8N102 p220 EIF4F, EIF4G, EIF4GI	cytoplasm, cytoplasmic stress granule, cytosol, eukaryotic translation initiation factor 4f complex, membrane, nucleus, polysome	eukaryotic initiation factor 4G family	http://zinc.docking.org/results/combination?filter.purchasability=purchasable&annotation.name=IF4G1_HUMAN	http://cansar.icr.ac.uk/cansar/molecular-targets/Q04637/				9	0	2	1	50	1	50	-3	59
	O43493	TGOLN2	Trans-Golgi network integral membrane protein 2		TGON2_HUMAN, TGOLN2, TGN46, TGN51	Cell membrane, Golgi apparatus, Trans-Golgi network membrane	O43493 TGON2_HUMAN Trans-Golgi network integral membrane protein 2 O43493,B2R686,B8ZZ88,D6W5K3,F8W8W7,F8WBK2,J3KQ45,O15282,O43492,O43499,O43500,O43501,Q53G68,Q53GV2,Q6MZV1,Q6ZTM7,Q8N6T8,Q92760,Q96QL2 Trans-Golgi network glycoprotein 46, Trans-Golgi network glycoprotein 48, Trans-Golgi network glycoprotein 51, Trans-Golgi network protein 2 TGN46, TGN51	clathrin-coated vesicle membrane, endoplasmic reticulum lumen, endosome, golgi apparatus, integral component of membrane, nucleoplasm, plasma membrane, trans-golgi network, trans-golgi network transport vesicle, transport vesicle		http://zinc.docking.org/results/combination?filter.purchasability=purchasable&annotation.name=TGON2_HUMAN	http://cansar.icr.ac.uk/cansar/molecular-targets/O43493/				0	0	0	0	0	0	0	-1.45	64
	P08133	ANXA6	Annexin A6		ANXA6_HUMAN, ANXA6, ANX6	Cytoplasm, Melanosome	P08133 ANXA6_HUMAN Annexin A6 P08133,B7Z8A7,D3DQH4,E9PGK1,Q6ZT79 67 kDa calelectrin, Annexin VI, Annexin-6, Calphobindin-II, Chromobindin-20, Lipocortin VI, Protein III, p68, p70 ANX6	collagen-containing extracellular matrix, cytoplasm, extracellular exosome, focal adhesion, late endosome membrane, lysosomal membrane, melanosome, membrane, mitochondrion, perinuclear region of cytoplasm	annexin family	http://zinc.docking.org/results/combination?filter.purchasability=purchasable&annotation.name=ANXA6_HUMAN	http://cansar.icr.ac.uk/cansar/molecular-targets/P08133/				1	0	1	1	100	1	100	-0.25	77
	P18583	SON	Protein SON		SON_HUMAN, SON, C21orf50, DBP5, KIAA1019, NREBP	Nucleus speckle	P18583 SON_HUMAN Protein SON P18583,D3DSF5,D3DSF6,E7ETE8,E7EU67,E7EVW3,E9PFQ2,O14487,O95981,Q14120,Q6PKE0,Q9H7B1,Q9P070,Q9P072,Q9UKP9,Q9UPY0 Bax antagonist selected in saccharomyces 1, Negative regulatory element-binding protein, Protein DBP-5, SON3 C21orf50, DBP5, KIAA1019, NREBP	nuclear speck		http://zinc.docking.org/results/combination?filter.purchasability=purchasable&annotation.name=SON_HUMAN	http://cansar.icr.ac.uk/cansar/molecular-targets/P18583/				0	0	0	0	0	0	0	-3	59
	P49755	TMED10	Transmembrane emp24 domain-containing protein 10		TMEDA_HUMAN, TMED10, TMP21	Golgi apparatus, Cis-Golgi network membrane, Melanosome, Endoplasmic reticulum membrane, Endoplasmic reticulum-Golgi intermediate compartment membrane, Cytoplasmic vesicle, Secretory vesicle membrane, Cell membrane, Golgi apparatus, Trans-Golgi network membrane	P49755 TMEDA_HUMAN Transmembrane emp24 domain-containing protein 10 P49755,B2R605,Q15602,Q16536,Q86TC2,Q86TS5 21 kDa transmembrane-trafficking protein, S31III125, Tmp-21-I, Transmembrane protein Tmp21, p23, p24 family protein delta-1, p24delta TMP21	cis-golgi network, copi-coated vesicle, copii-coated er to golgi transport vesicle, endoplasmic reticulum, endoplasmic reticulum membrane, endoplasmic reticulum-golgi intermediate compartment, endoplasmic reticulum-golgi intermediate compartment membrane, er to golgi transport vesicle membrane, gamma-secretase complex, golgi apparatus, golgi membrane, integral component of membrane, melanosome, p…	EMP24/GP25L family	http://zinc.docking.org/results/combination?filter.purchasability=purchasable&annotation.name=TMEDA_HUMAN	http://cansar.icr.ac.uk/cansar/molecular-targets/P49755/				0	0	0	0	0	0	0	-3	59	1	1	0	0	1	0	0
	Q9HCC0	MCCC2	Methylcrotonoyl-CoA carboxylase beta chain, mitochondrial	6.4.1.4	MCCB_HUMAN, MCCC2, MCCB	Mitochondrion matrix	Q9HCC0 MCCB_HUMAN Methylcrotonoyl-CoA carboxylase beta chain, mitochondrial Q9HCC0,A6NIY9,Q96C27,Q9Y4L7 3-methylcrotonyl-CoA carboxylase 2, 3-methylcrotonyl-CoA carboxylase non-biotin-containing subunit, 3-methylcrotonyl-CoA:carbon dioxide ligase subunit beta MCCB	3-methylcrotonyl-coa carboxylase complex, cytosol, methylcrotonoyl-coa carboxylase complex, mitochondrial matrix, mitochondrion	AccD/PCCB family	http://zinc.docking.org/results/combination?filter.purchasability=purchasable&annotation.name=MCCB_HUMAN	http://cansar.icr.ac.uk/cansar/molecular-targets/Q9HCC0/				0	0	0	0	0	0	0	-1.55	63
	O95084	PRSS23	Serine protease 23	3.4.21.-	PRS23_HUMAN, PRSS23, ZSIG13	Secreted	O95084 PRS23_HUMAN Serine protease 23 O95084,B2RDJ1,B4E2J3,Q6IBI0 Putative secreted protein Zsig13 ZSIG13	endoplasmic reticulum lumen, extracellular exosome, nucleus	peptidase S1 family	http://zinc.docking.org/results/combination?filter.purchasability=purchasable&annotation.name=PRS23_HUMAN	http://cansar.icr.ac.uk/cansar/molecular-targets/O95084/				0	0	0	0	0	0	0	-0.95	69
	P61978	HNRNPK	Heterogeneous nuclear ribonucleoprotein K		HNRPK_HUMAN, HNRNPK, HNRPK	Cytoplasm, Nucleus, Nucleoplasm, Cell projection, Podosome	P61978 HNRPK_HUMAN Heterogeneous nuclear ribonucleoprotein K P61978,Q07244,Q15671,Q59F98,Q5T6W4,Q60577,Q6IBN1,Q922Y7,Q96J62 Transformation up-regulated nuclear protein HNRPK	catalytic step 2 spliceosome, cell projection, cytoplasm, cytoplasmic stress granule, extracellular exosome, focal adhesion, membrane, nuclear chromatin, nucleoplasm, nucleus, podosome		http://zinc.docking.org/results/combination?filter.purchasability=purchasable&annotation.name=HNRPK_HUMAN	http://cansar.icr.ac.uk/cansar/molecular-targets/P61978/				5	0	5	0	0	1	20	-3	59
	Q14240	EIF4A2	Eukaryotic initiation factor 4A-II	3.6.4.13	IF4A2_HUMAN, EIF4A2, DDX2B, EIF4F		Q14240 IF4A2_HUMAN Eukaryotic initiation factor 4A-II Q14240,D3DNU9,Q53XJ6,Q96B90,Q96EA8 ATP-dependent RNA helicase eIF4A-2 DDX2B, EIF4F	cytosol, eukaryotic translation initiation factor 4f complex, perinuclear region of cytoplasm	DEAD box helicase family	http://zinc.docking.org/results/combination?filter.purchasability=purchasable&annotation.name=IF4A2_HUMAN	http://cansar.icr.ac.uk/cansar/molecular-targets/Q14240/				1	0	1	0	0	1	100	-0.65	72	1	9	0	0	7	0	0
	P61619	SEC61A1	Protein transport protein Sec61 subunit alpha isoform 1		S61A1_HUMAN, SEC61A1, SEC61A	Endoplasmic reticulum membrane	P61619 S61A1_HUMAN Protein transport protein Sec61 subunit alpha isoform 1 P61619,P38378,P57726,Q5JPF8,Q8N0Z4,Q8N3U3,Q8NC71,Q9BU16,Q9Y2R3 SEC61A	cytosol, endoplasmic reticulum, endoplasmic reticulum membrane, integral component of endoplasmic reticulum membrane, membrane, sec61 translocon complex	SecY/SEC61-alpha family	http://zinc.docking.org/results/combination?filter.purchasability=purchasable&annotation.name=S61A1_HUMAN	http://cansar.icr.ac.uk/cansar/molecular-targets/P61619/				0	0	0	0	0	0	0	-3	59
	O14950	MYL12B	Myosin regulatory light chain 12B		ML12B_HUMAN, MYL12B, MRLC2, MYLC2B		O14950 ML12B_HUMAN Myosin regulatory light chain 12B O14950,D3DUH6,Q13182,Q7Z5Z4 MLC-2A, Myosin regulatory light chain 2-B, smooth muscle isoform, Myosin regulatory light chain 20 kDa, Myosin regulatory light chain MRLC2, SHUJUN-1 MRLC2, MYLC2B	apical part of cell, brush border, cell cortex region, cytosol, extracellular exosome, myosin ii complex, stress fiber, z disc		http://zinc.docking.org/results/combination?filter.purchasability=purchasable&annotation.name=ML12B_HUMAN	http://cansar.icr.ac.uk/cansar/molecular-targets/O14950/				0	0	0	0	0	0	0	-1	68
	P07910	HNRNPC	Heterogeneous nuclear ribonucleoproteins C1/C2		HNRPC_HUMAN, HNRNPC, HNRPC	Nucleus	P07910 HNRPC_HUMAN Heterogeneous nuclear ribonucleoproteins C1/C2 P07910,D3DS19,D3DS22,P22628,Q53EX2,Q59FD3,Q5FWE8,Q86SF8,Q86U45,Q96HK7,Q96HM4,Q96IY5,Q9BTS3 HNRPC	actin cytoskeleton, catalytic step 2 spliceosome, cytosol, extracellular exosome, extracellular region, membrane, nuclear chromatin, nucleoplasm, nucleus, protein-containing complex, spliceosomal complex, telomerase holoenzyme complex	RRM HNRPC family	http://zinc.docking.org/results/combination?filter.purchasability=purchasable&annotation.name=HNRPC_HUMAN	http://cansar.icr.ac.uk/cansar/molecular-targets/P07910/				5	0	3	0	0	3	100	-3	59	1	2	0	0	2	0	0
	Q6ZMP0	THSD4	Thrombospondin type-1 domain-containing protein 4		THSD4_HUMAN, THSD4	Secreted, Extracellular space, Extracellular matrix	Q6ZMP0 THSD4_HUMAN Thrombospondin type-1 domain-containing protein 4 Q6ZMP0,B2RTY3,B4DR13,Q6MZI3,Q6UXZ8,Q9H8E4 A disintegrin and metalloproteinase with thrombospondin motifs-like protein 6	collagen-containing extracellular matrix, extracellular exosome, microfibril		http://zinc.docking.org/results/combination?filter.purchasability=purchasable&annotation.name=THSD4_HUMAN	http://cansar.icr.ac.uk/cansar/molecular-targets/Q6ZMP0/				0	0	0	0	0	0	0	0.6	86
	P08910	ABHD2	Monoacylglycerol lipase ABHD2	3.1.1.23	ABHD2_HUMAN, ABHD2, LABH2	Cell projection, Cilium, Flagellum membrane, Cell membrane	P08910 ABHD2_HUMAN Monoacylglycerol lipase ABHD2 P08910,Q53G48,Q53GU0,Q5FVD9,Q8TC79 2-arachidonoylglycerol hydrolase, Abhydrolase domain-containing protein 2, Acetylesterase, Lung alpha/beta hydrolase 2, Progesterone-sensitive lipase, Protein PHPS1-2 LABH2	acrosomal vesicle, integral component of membrane, sperm flagellum, sperm plasma membrane	AB hydrolase 4 family	http://zinc.docking.org/results/combination?filter.purchasability=purchasable&annotation.name=ABHD2_HUMAN	http://cansar.icr.ac.uk/cansar/molecular-targets/P08910/				0	0	0	0	0	0	0	0	80
	P49458	SRP9	Signal recognition particle 9 kDa protein		SRP09_HUMAN, SRP9	Cytoplasm	P49458 SRP09_HUMAN Signal recognition particle 9 kDa protein P49458,A8K0N0,Q6NVX0,Q8WTW0	cytosol, signal recognition particle receptor complex, signal recognition particle	SRP9 family	http://zinc.docking.org/results/combination?filter.purchasability=purchasable&annotation.name=SRP09_HUMAN	http://cansar.icr.ac.uk/cansar/molecular-targets/P49458/				6	0	5	0	0	3	60	-3	59
	P16422	EPCAM	Epithelial cell adhesion molecule		EPCAM_HUMAN, EPCAM, GA733-2, M1S2, M4S1, MIC18, TACSTD1, TROP1	Lateral cell membrane, Cell junction, Tight junction	P16422 EPCAM_HUMAN Epithelial cell adhesion molecule P16422,P18180,Q6FG26,Q6FG49,Q96C47,Q9UCD0 Adenocarcinoma-associated antigen, Cell surface glycoprotein Trop-1, Epithelial cell surface antigen, Epithelial glycoprotein, Epithelial glycoprotein 314, KS 1/4 antigen, KSA, Major gastrointestinal tumor-associated protein GA733-2, Tumor-associated calcium signal transducer 1 GA733-2, M1S2, M4S1, MIC1…	apical plasma membrane, basolateral plasma membrane, bicellular tight junction, cell surface, extracellular exosome, integral component of membrane, lateral plasma membrane, plasma membrane	EPCAM family	http://zinc.docking.org/results/combination?filter.purchasability=purchasable&annotation.name=EPCAM_HUMAN	http://cansar.icr.ac.uk/cansar/molecular-targets/P16422/				2	2	2	0	0	2	100	-3	59
	Q8NBS9	TXNDC5	Thioredoxin domain-containing protein 5		TXND5_HUMAN, TXNDC5, TLP46	Endoplasmic reticulum lumen	Q8NBS9 TXND5_HUMAN Thioredoxin domain-containing protein 5 Q8NBS9,B2RDM2,Q5TCQ0,Q8ND33,Q8TCT2,Q9BVH9 Endoplasmic reticulum resident protein 46, Thioredoxin-like protein p46 TLP46	azurophil granule lumen, endoplasmic reticulum, endoplasmic reticulum lumen, extracellular exosome, extracellular region, lysosomal lumen	protein disulfide isomerase family	http://zinc.docking.org/results/combination?filter.purchasability=purchasable&annotation.name=TXND5_HUMAN	http://cansar.icr.ac.uk/cansar/molecular-targets/Q8NBS9/				6	0	6	0	0	4	67	-0.55	73
	Q15904	ATP6AP1	V-type proton ATPase subunit S1		VAS1_HUMAN, ATP6AP1, ATP6IP1, ATP6S1, VATPS1, XAP3	Endoplasmic reticulum membrane, Endoplasmic reticulum-Golgi intermediate compartment membrane	Q15904 VAS1_HUMAN V-type proton ATPase subunit S1 Q15904,A6ZKI4,Q8NBT4,Q9H0C7 Protein XAP-3, V-ATPase Ac45 subunit, V-ATPase S1 accessory protein, Vacuolar proton pump subunit S1 ATP6IP1, ATP6S1, VATPS1, XAP3	endoplasmic reticulum membrane, endoplasmic reticulum-golgi intermediate compartment membrane, endosome membrane, extracellular exosome, integral component of membrane, plasma membrane proton-transporting v-type atpase complex, proton-transporting two-sector atpase complex, proton-transporting v-type atpase	vacuolar ATPase subunit S1 family	http://zinc.docking.org/results/combination?filter.purchasability=purchasable&annotation.name=VAS1_HUMAN	http://cansar.icr.ac.uk/cansar/molecular-targets/Q15904/				0	0	0	0	0	0	0	-1.7	61	1	33	0	0	16	0	0
	Q6P2Q9	PRPF8	Pre-mRNA-processing-splicing factor 8		PRP8_HUMAN, PRPF8, PRPC8	Nucleus, Nucleus speckle	Q6P2Q9 PRP8_HUMAN Pre-mRNA-processing-splicing factor 8 Q6P2Q9,O14547,O75965 220 kDa U5 snRNP-specific protein, PRP8 homolog, Splicing factor Prp8, p220 PRPC8	catalytic step 2 spliceosome, membrane, nuclear speck, nucleoplasm, nucleus, u2-type catalytic step 1 spliceosome, u2-type catalytic step 2 spliceosome, u2-type precatalytic spliceosome, u4/u6 x u5 tri-snrnp complex, u5 snrnp		http://zinc.docking.org/results/combination?filter.purchasability=purchasable&annotation.name=PRP8_HUMAN	http://cansar.icr.ac.uk/cansar/molecular-targets/Q6P2Q9/				27	7	26	10	39	26	100	-3	59
	Q9Y624	F11R	Junctional adhesion molecule A		JAM1_HUMAN, F11R, JAM1, JCAM	Cell junction, Tight junction, Cell membrane	Q9Y624 JAM1_HUMAN Junctional adhesion molecule A Q9Y624,B7Z941 Junctional adhesion molecule 1, Platelet F11 receptor, Platelet adhesion molecule 1 JAM1, JCAM	bicellular tight junction, cell junction, cell-cell junction, cytoplasmic vesicle, extracellular exosome, integral component of membrane, plasma membrane, protein-containing complex, slit diaphragm, tight junction		http://zinc.docking.org/results/combination?filter.purchasability=purchasable&annotation.name=JAM1_HUMAN	http://cansar.icr.ac.uk/cansar/molecular-targets/Q9Y624/				4	0	3	0	0	1	34	1.35	93
	Q13571	LAPTM5	Lysosomal-associated transmembrane protein 5		LAPM5_HUMAN, LAPTM5, KIAA0085	Lysosome membrane	Q13571 LAPM5_HUMAN Lysosomal-associated transmembrane protein 5 Q13571,Q13240,Q14698,Q3KP54 Lysosomal-associated multitransmembrane protein 5, Retinoic acid-inducible E3 protein KIAA0085	integral component of plasma membrane, lysosomal membrane, lysosome	LAPTM4/LAPTM5 transporter family	http://zinc.docking.org/results/combination?filter.purchasability=purchasable&annotation.name=LAPM5_HUMAN	http://cansar.icr.ac.uk/cansar/molecular-targets/Q13571/				0	0	0	0	0	0	0	0.6	86
	P09874	PARP1	Poly [ADP-ribose] polymerase 1	2.4.2.30	PARP1_HUMAN, PARP1, ADPRT, PPOL	Nucleus, Nucleus, Nucleolus, Chromosome	P09874 PARP1_HUMAN Poly [ADP-ribose] polymerase 1 P09874,B1ANJ4,Q8IUZ9 ADP-ribosyltransferase diphtheria toxin-like 1, DNA ADP-ribosyltransferase PARP1, NAD(+) ADP-ribosyltransferase 1, Poly[ADP-ribose] synthase 1, Protein poly-ADP-ribosyltransferase PARP1 ADPRT, PPOL	membrane, mitochondrion, nuclear body, nuclear chromosome, nuclear envelope, nucleolus, nucleoplasm, nucleus, protein-containing complex, protein-dna complex, site of dna damage, site of double-strand break, transcription regulator complex		http://zinc.docking.org/results/combination?filter.purchasability=purchasable&annotation.name=PARP1_HUMAN	http://cansar.icr.ac.uk/cansar/molecular-targets/P09874/	100.00|P09874|PARP1|Talazoparib Tosylate,Talazoparib,Rucaparib Camsylate,Rucaparib,Olaparib,Niraparib Tosylate,Niraparib|Whole:::Protein	100.00|P09874|PARP1|Talazoparib Tosylate,Talazoparib,Rucaparib Camsylate,Rucaparib,Olaparib,Niraparib Tosylate,Niraparib|Whole:::Protein	100.00|P09874|PARP1|Talazoparib Tosylate,Talazoparib,Rucaparib Camsylate,Rucaparib,Olaparib,Niraparib Tosylate,Niraparib|Whole:::Protein||41.96|Q9UGN5|PARP2|Talazoparib Tosylate,Talazoparib,Rucaparib Camsylate,Rucaparib,Olaparib,Niraparib Tosylate,Niraparib|Whole:::Protein	67	51	67	53	80	67	100	2.35	98	1	3766	1671	1491	1641	809	716
	Q53GD3	SLC44A4	Choline transporter-like protein 4		CTL4_HUMAN, SLC44A4, C6orf29, CTL4, NG22, TPPT1	Membrane, Apical cell membrane	Q53GD3 CTL4_HUMAN Choline transporter-like protein 4 Q53GD3,A2BED3,B0UXX8,B0UZY8,B4DU94,B4DWM2,E9PEK7,Q5JP84,Q5JQ93,Q658S8,Q6UX89,Q8TEW4,Q96C58,Q96K59,Q9Y332 Solute carrier family 44 member 4, Thiamine pyrophosphate transporter 1 C6orf29, CTL4, NG22, TPPT1	apical plasma membrane, extracellular exosome, integral component of membrane, membrane, plasma membrane	CTL (choline transporter-like) family	http://zinc.docking.org/results/combination?filter.purchasability=purchasable&annotation.name=CTL4_HUMAN	http://cansar.icr.ac.uk/cansar/molecular-targets/Q53GD3/				0	0	0	0	0	0	0	-1.7	61
	Q14667	KIAA0100	Protein KIAA0100		K0100_HUMAN, KIAA0100, BCOX1	Secreted	Q14667 K0100_HUMAN Protein KIAA0100 Q14667,A6NCX3,Q3SYN5,Q49A07,Q5H9T4,Q6WG74,Q6ZP51,Q96HH8 Antigen MLAA-22, Breast cancer-overexpressed gene 1 protein BCOX1	extracellular region	SABRE family	http://zinc.docking.org/results/combination?filter.purchasability=purchasable&annotation.name=K0100_HUMAN	http://cansar.icr.ac.uk/cansar/molecular-targets/Q14667/				0	0	0	0	0	0	0	-3	59
	Q14517	FAT1	Protocadherin Fat 1		FAT1_HUMAN, FAT1, CDHF7, FAT	Cell membrane, Nucleus, Cytoplasm, Perinuclear region	Q14517 FAT1_HUMAN Protocadherin Fat 1 Q14517 Cadherin family member 7, Cadherin-related tumor suppressor homolog, Protein fat homolog CDHF7, FAT	apical plasma membrane, cell-cell junction, extracellular exosome, filopodium, focal adhesion, integral component of plasma membrane, lamellipodium, nucleus, perinuclear region of cytoplasm, plasma membrane		http://zinc.docking.org/results/combination?filter.purchasability=purchasable&annotation.name=FAT1_HUMAN	http://cansar.icr.ac.uk/cansar/molecular-targets/Q14517/				0	0	0	0	0	0	0	1.8	96
	Q14108	SCARB2	Lysosome membrane protein 2		SCRB2_HUMAN, SCARB2, CD36L2, LIMP2, LIMPII	Lysosome membrane	Q14108 SCRB2_HUMAN Lysosome membrane protein 2 Q14108,B4DKD8,E7EM68,Q53Y63 85 kDa lysosomal membrane sialoglycoprotein, CD36 antigen-like 2, Lysosome membrane protein II, Scavenger receptor class B member 2 CD36L2, LIMP2, LIMPII	clathrin-coated vesicle membrane, endocytic vesicle membrane, endoplasmic reticulum membrane, endosome membrane, extracellular exosome, focal adhesion, golgi membrane, integral component of membrane, late endosome membrane, lysosomal lumen, lysosomal membrane, membrane, plasma membrane	CD36 family	http://zinc.docking.org/results/combination?filter.purchasability=purchasable&annotation.name=SCRB2_HUMAN	http://cansar.icr.ac.uk/cansar/molecular-targets/Q14108/				9	9	9	9	100	9	100	-1.35	65
	Q15388	TOMM20	Mitochondrial import receptor subunit TOM20 homolog		TOM20_HUMAN, TOMM20, KIAA0016	Mitochondrion outer membrane	Q15388 TOM20_HUMAN Mitochondrial import receptor subunit TOM20 homolog Q15388,A8K195,Q498B3,Q6IBT4 Mitochondrial 20 kDa outer membrane protein, Outer mitochondrial membrane receptor Tom20 KIAA0016	integral component of mitochondrial outer membrane, mitochondria-associated endoplasmic reticulum membrane, mitochondrial outer membrane, mitochondrial outer membrane translocase complex, mitochondrion	Tom20 family	http://zinc.docking.org/results/combination?filter.purchasability=purchasable&annotation.name=TOM20_HUMAN	http://cansar.icr.ac.uk/cansar/molecular-targets/Q15388/				1	0	0	0	0	0	0	-3	59
	P46783	RPS10	40S ribosomal protein S10		RS10_HUMAN, RPS10	Cytoplasm, Nucleus, Nucleolus	P46783 RS10_HUMAN 40S ribosomal protein S10 P46783,B2R4E3,Q5TZC0 Small ribosomal subunit protein eS10	cytosol, cytosolic small ribosomal subunit, focal adhesion, membrane, nucleolus, nucleoplasm, ribosome	eukaryotic ribosomal protein eS10 family	http://zinc.docking.org/results/combination?filter.purchasability=purchasable&annotation.name=RS10_HUMAN	http://cansar.icr.ac.uk/cansar/molecular-targets/P46783/				23	0	23	2	9	12	53	-3	59
	Q9Y696	CLIC4	Chloride intracellular channel protein 4		CLIC4_HUMAN, CLIC4	Cytoplasm, Cytoskeleton, Microtubule organizing center, Centrosome, Cytoplasmic vesicle membrane, Nucleus matrix, Cell membrane, Mitochondrion, Cell junction	Q9Y696 CLIC4_HUMAN Chloride intracellular channel protein 4 Q9Y696,Q9UFW9,Q9UQJ6 Intracellular chloride ion channel protein p64H1	actin cytoskeleton, apical part of cell, cell surface, cell-cell junction, centrosome, chloride channel complex, cytoplasm, cytoplasmic vesicle membrane, cytosol, extracellular exosome, intracellular, microvillus, midbody, mitochondrion, nuclear matrix, nucleus, perinuclear region of cytoplasm, plasma membrane	chloride channel CLIC family	http://zinc.docking.org/results/combination?filter.purchasability=purchasable&annotation.name=CLIC4_HUMAN	http://cansar.icr.ac.uk/cansar/molecular-targets/Q9Y696/				3	0	2	0	0	2	100	-3	59
	P50591	TNFSF10	Tumor necrosis factor ligand superfamily member 10		TNF10_HUMAN, TNFSF10, APO2L, TRAIL	Cell membrane, Secreted	P50591 TNF10_HUMAN Tumor necrosis factor ligand superfamily member 10 P50591,A1Y9B3 Apo-2 ligand, TNF-related apoptosis-inducing ligand APO2L, TRAIL	extracellular exosome, extracellular region, integral component of plasma membrane	tumor necrosis factor family	http://zinc.docking.org/results/combination?filter.purchasability=purchasable&annotation.name=TNF10_HUMAN	http://cansar.icr.ac.uk/cansar/molecular-targets/P50591/				7	0	7	1	15	5	72	0.1	81	1	1	0	0	1	0	0
	Q86UP2	KTN1	Kinectin		KTN1_HUMAN, KTN1, CG1, KIAA0004	Endoplasmic reticulum membrane	Q86UP2 KTN1_HUMAN Kinectin Q86UP2,B4DZ88,Q13999,Q14707,Q15387,Q17RZ5,Q5GGW3,Q86W57 CG-1 antigen, Kinesin receptor CG1, KIAA0004	endoplasmic reticulum, endoplasmic reticulum lumen, endoplasmic reticulum membrane, integral component of membrane, integral component of plasma membrane, membrane	kinectin family	http://zinc.docking.org/results/combination?filter.purchasability=purchasable&annotation.name=KTN1_HUMAN	http://cansar.icr.ac.uk/cansar/molecular-targets/Q86UP2/				0	0	0	0	0	0	0	-3	59
	Q07654	TFF3	Trefoil factor 3		TFF3_HUMAN, TFF3, ITF, TFI	Secreted, Extracellular space, Extracellular matrix, Cytoplasm	Q07654 TFF3_HUMAN Trefoil factor 3 Q07654,A0A0A6YYJ4,E9PBB5,Q96NX0,Q9UDA5 Intestinal trefoil factor, Polypeptide P1.B ITF, TFI	extracellular region, extracellular space, secretory granule		http://zinc.docking.org/results/combination?filter.purchasability=purchasable&annotation.name=TFF3_HUMAN	http://cansar.icr.ac.uk/cansar/molecular-targets/Q07654/				3	1	3	0	0	2	67	-3	59
	Q14494	NFE2L1	Endoplasmic reticulum membrane sensor NFE2L1		NF2L1_HUMAN, NFE2L1, HBZ17, NRF1, TCF11	Endoplasmic reticulum membrane, Endoplasmic reticulum membrane, Nucleus	Q14494 NF2L1_HUMAN Endoplasmic reticulum membrane sensor NFE2L1 Q14494,D3DTU3,D3DTU5,Q12877,Q96FN6 Locus control region-factor 1, Nuclear factor erythroid 2-related factor 1, Nuclear factor, erythroid derived 2, like 1, Protein NRF1, p120 form, Transcription factor 11 HBZ17, NRF1, TCF11	cytoplasm, cytosol, endoplasmic reticulum membrane, host cell nucleus, integral component of endoplasmic reticulum membrane, integral component of membrane, nuclear chromatin, nucleoplasm, nucleus, protein-containing complex	bZIP family	http://zinc.docking.org/results/combination?filter.purchasability=purchasable&annotation.name=NF2L1_HUMAN	http://cansar.icr.ac.uk/cansar/molecular-targets/Q14494/				0	0	0	0	0	0	0	0.65	86
	Q15366	PCBP2	Poly(rC)-binding protein 2		PCBP2_HUMAN, PCBP2	Nucleus, Cytoplasm	Q15366 PCBP2_HUMAN Poly(rC)-binding protein 2 Q15366,A8K7X6,B4DXP5,F8VYL7,G3V0E8,I6L8F9,Q32Q82,Q59HD4,Q68Y55,Q6IPF4,Q6PKG5 Alpha-CP2, Heterogeneous nuclear ribonucleoprotein E2	cytoplasm, cytosol, extracellular exosome, focal adhesion, membrane, nucleoplasm, nucleus		http://zinc.docking.org/results/combination?filter.purchasability=purchasable&annotation.name=PCBP2_HUMAN	http://cansar.icr.ac.uk/cansar/molecular-targets/Q15366/				5	1	5	1	20	4	80	-3	59	1	1	0	0	1	0	0
	P10644	PRKAR1A	cAMP-dependent protein kinase type I-alpha regulatory subunit		KAP0_HUMAN, PRKAR1A, PKR1, PRKAR1, TSE1	Cell membrane	P10644 KAP0_HUMAN cAMP-dependent protein kinase type I-alpha regulatory subunit P10644,K7ER48,Q567S7 Tissue-specific extinguisher 1 PKR1, PRKAR1, TSE1	camp-dependent protein kinase complex, centrosome, ciliary base, cytoplasm, cytosol, glutamatergic synapse, membrane, multivesicular body, neuromuscular junction, nucleotide-activated protein kinase complex, plasma membrane raft, protein-containing complex, sperm connecting piece	cAMP-dependent kinase regulatory chain family	http://zinc.docking.org/results/combination?filter.purchasability=purchasable&annotation.name=KAP0_HUMAN	http://cansar.icr.ac.uk/cansar/molecular-targets/P10644/				3	3	3	2	67	3	100	0.6	86	1	14	1	0	3	1	0
	Q7Z7D3	VTCN1	V-set domain-containing T-cell activation inhibitor 1		VTCN1_HUMAN, VTCN1, B7H4	Cell membrane	Q7Z7D3 VTCN1_HUMAN V-set domain-containing T-cell activation inhibitor 1 Q7Z7D3,Q0GN76,Q45VN0,Q5WPZ3,Q6P097,Q9H6B2 B7 homolog 4, B7h.5, Immune costimulatory protein B7-H4, Protein B7S1, T-cell costimulatory molecule B7x B7H4	external side of plasma membrane, integral component of membrane	BTN/MOG family	http://zinc.docking.org/results/combination?filter.purchasability=purchasable&annotation.name=VTCN1_HUMAN	http://cansar.icr.ac.uk/cansar/molecular-targets/Q7Z7D3/				1	0	1	0	0	0	0	-0.2	77
	Q63HN8	RNF213	E3 ubiquitin-protein ligase RNF213	2.3.2.27	RN213_HUMAN, RNF213, ALO17, C17orf27, KIAA1554, KIAA1618, MYSTR	Cytoplasm, Cytosol	Q63HN8 RN213_HUMAN E3 ubiquitin-protein ligase RNF213 Q63HN8,C9JCP4,D6RI12,F8WKS1,Q658P6,Q69YK7,Q6MZR1,Q8IWF4,Q8IZX1,Q8IZX2,Q8N406,Q8TEU0,Q9H6C9,Q9H6H9,Q9H6P3,Q9H8A9,Q9HCF4,Q9HCL8 ALK lymphoma oligomerization partner on chromosome 17, Mysterin, RING finger protein 213, RING-type E3 ubiquitin transferase RNF213 ALO17, C17orf27, KIAA1554, KIAA1618, MYSTR	cytoplasm, cytosol, membrane, nucleolus	AAA ATPase family	http://zinc.docking.org/results/combination?filter.purchasability=purchasable&annotation.name=RN213_HUMAN	http://cansar.icr.ac.uk/cansar/molecular-targets/Q63HN8/				0	0	0	0	0	0	0	0.55	85
	Q00765	REEP5	Receptor expression-enhancing protein 5		REEP5_HUMAN, REEP5, C5orf18, DP1, TB2	Membrane, Endoplasmic reticulum	Q00765 REEP5_HUMAN Receptor expression-enhancing protein 5 Q00765,B7Z681,D3DT04,Q04198,Q5QGT0,Q9BWH9 Polyposis locus protein 1, Protein TB2 C5orf18, DP1, TB2	endoplasmic reticulum tubular network, integral component of membrane, membrane	DP1 family	http://zinc.docking.org/results/combination?filter.purchasability=purchasable&annotation.name=REEP5_HUMAN	http://cansar.icr.ac.uk/cansar/molecular-targets/Q00765/				0	0	0	0	0	0	0	-3	59
	P28562	DUSP1	Dual specificity protein phosphatase 1	3.1.3.16	DUS1_HUMAN, DUSP1, CL100, MKP1, PTPN10, VH1	Nucleus	P28562 DUS1_HUMAN Dual specificity protein phosphatase 1 P28562,D3DQL9,Q2V508 Dual specificity protein phosphatase hVH1, Mitogen-activated protein kinase phosphatase 1, Protein-tyrosine phosphatase CL100 CL100, MKP1, PTPN10, VH1	cytoplasm, nucleus	protein-tyrosine phosphatase family	http://zinc.docking.org/results/combination?filter.purchasability=purchasable&annotation.name=DUS1_HUMAN	http://cansar.icr.ac.uk/cansar/molecular-targets/P28562/				4	1	4	0	0	4	100	-0.95	69	1	30	0	0	8	0	0
	P12107	COL11A1	Collagen alpha-1(XI) chain		COBA1_HUMAN, COL11A1, COLL6	Secreted, Extracellular space, Extracellular matrix	P12107 COBA1_HUMAN Collagen alpha-1(XI) chain P12107,B1ASK7,D3DT73,E9PCU0,Q14034,Q149N0,Q9UIT4,Q9UIT5,Q9UIT6 COLL6	collagen type xi trimer, collagen-containing extracellular matrix, endoplasmic reticulum lumen, extracellular matrix, extracellular region, extracellular space	fibrillar collagen family	http://zinc.docking.org/results/combination?filter.purchasability=purchasable&annotation.name=COBA1_HUMAN	http://cansar.icr.ac.uk/cansar/molecular-targets/P12107/				0	0	0	0	0	0	0	-1.05	68
	P08758	ANXA5	Annexin A5		ANXA5_HUMAN, ANXA5, ANX5, ENX2, PP4		P08758 ANXA5_HUMAN Annexin A5 P08758,D3DNW7,Q6FHB3,Q6FI16,Q8WV69,Q9UDH9 Anchorin CII, Annexin V, Annexin-5, Calphobindin I, Endonexin II, Lipocortin V, Placental anticoagulant protein 4, Placental anticoagulant protein I, Thromboplastin inhibitor, Vascular anticoagulant-alpha ANX5, ENX2, PP4	collagen-containing extracellular matrix, cytoplasm, cytosol, endothelial microparticle, external side of plasma membrane, extracellular exosome, extracellular region, focal adhesion, intracellular, membrane	annexin family	http://zinc.docking.org/results/combination?filter.purchasability=purchasable&annotation.name=ANXA5_HUMAN	http://cansar.icr.ac.uk/cansar/molecular-targets/P08758/				14	4	14	11	79	14	100	-3	59
	Q92626	PXDN	Peroxidasin homolog	1.11.1.7	PXDN_HUMAN, PXDN, KIAA0230, MG50, PRG2, VPO, VPO1	Secreted, Extracellular space, Extracellular matrix	Q92626 PXDN_HUMAN Peroxidasin homolog Q92626,A8QM65,D6W4Y0,Q4KMG2 Melanoma-associated antigen MG50, Vascular peroxidase 1, p53-responsive gene 2 protein KIAA0230, MG50, PRG2, VPO, VPO1	collagen-containing extracellular matrix, endoplasmic reticulum, extracellular exosome, extracellular region, extracellular space	peroxidase family	http://zinc.docking.org/results/combination?filter.purchasability=purchasable&annotation.name=PXDN_HUMAN	http://cansar.icr.ac.uk/cansar/molecular-targets/Q92626/	42.07|P07202|TPO|Propylthiouracil,Methimazole|Whole:::Protein		42.07|P07202|TPO|Propylthiouracil,Methimazole|Whole:::Protein	0	0	0	0	0	0	0	-1.05	68
	O15372	EIF3H	Eukaryotic translation initiation factor 3 subunit H		EIF3H_HUMAN, EIF3H, EIF3S3	Cytoplasm	O15372 EIF3H_HUMAN Eukaryotic translation initiation factor 3 subunit H O15372 Eukaryotic translation initiation factor 3 subunit 3, eIF-3-gamma, eIF3 p40 subunit EIF3S3	cytosol, eukaryotic 43s preinitiation complex, eukaryotic 48s preinitiation complex, eukaryotic translation initiation factor 3 complex, eukaryotic translation initiation factor 3 complex, extracellular exosome, membrane, polysomal ribosome	eIF-3 subunit H family	http://zinc.docking.org/results/combination?filter.purchasability=purchasable&annotation.name=EIF3H_HUMAN	http://cansar.icr.ac.uk/cansar/molecular-targets/O15372/				2	0	2	2	100	2	100	-1.35	65
	Q13813	SPTAN1	Spectrin alpha chain, non-erythrocytic 1		SPTN1_HUMAN, SPTAN1, NEAS, SPTA2	Cytoplasm, Cytoskeleton, Cytoplasm, Cell cortex	Q13813 SPTN1_HUMAN Spectrin alpha chain, non-erythrocytic 1 Q13813,Q13186,Q15324,Q16606,Q59EF1,Q5VXV5,Q5VXV6,Q7Z6M5,Q9P0V0 Alpha-II spectrin, Fodrin alpha chain, Spectrin, non-erythroid alpha subunit NEAS, SPTA2	cytosol, extracellular exosome, extracellular region, extracellular vesicle, intracellular membrane-bounded organelle, membrane, microtubule cytoskeleton, specific granule lumen, spectrin, tertiary granule lumen	spectrin family	http://zinc.docking.org/results/combination?filter.purchasability=purchasable&annotation.name=SPTN1_HUMAN	http://cansar.icr.ac.uk/cansar/molecular-targets/Q13813/				20	0	19	1	6	5	27	0.15	81
	P67809	YBX1	Y-box-binding protein 1		YBOX1_HUMAN, YBX1, NSEP1, YB1	Cytoplasm, Nucleus, Cytoplasmic granule, Secreted, Secreted, Extracellular exosome	P67809 YBOX1_HUMAN Y-box-binding protein 1 P67809,P16990,P16991,Q14972,Q15325,Q5FVF0 CCAAT-binding transcription factor I subunit A, DNA-binding protein B, Enhancer factor I subunit A, Nuclease-sensitive element-binding protein 1, Y-box transcription factor NSEP1, YB1	crd-mediated mrna stability complex, cytoplasm, cytoplasmic stress granule, cytosol, extracellular exosome, extracellular region, histone pre-mrna 3'end processing complex, intracellular membrane-bounded organelle, messenger ribonucleoprotein complex, nuclear membrane, nucleoplasm, nucleus, ribonucleoprotein complex, u12-type spliceosomal complex	YBX1 family	http://zinc.docking.org/results/combination?filter.purchasability=purchasable&annotation.name=YBOX1_HUMAN	http://cansar.icr.ac.uk/cansar/molecular-targets/P67809/				11	0	9	0	0	6	67	-3	59	1	1	0	0	1	0	0
	P40763	STAT3	Signal transducer and activator of transcription 3		STAT3_HUMAN, STAT3, APRF	Cytoplasm, Nucleus	P40763 STAT3_HUMAN Signal transducer and activator of transcription 3 P40763,A8K7B8,K7ENL3,O14916,Q9BW54 Acute-phase response factor APRF	cytoplasm, cytosol, glutamatergic synapse, mitochondrial inner membrane, nuclear chromatin, nucleoplasm, nucleus, plasma membrane, postsynaptic density, rna polymerase ii transcription regulator complex, schaffer collateral - ca1 synapse, transcription regulator complex	transcription factor STAT family	http://zinc.docking.org/results/combination?filter.purchasability=purchasable&annotation.name=STAT3_HUMAN	http://cansar.icr.ac.uk/cansar/molecular-targets/P40763/				7	4	5	4	80	5	100	2.05	97	1	1050	6	1	423	3	1
	Q9HB63	NTN4	Netrin-4		NET4_HUMAN, NTN4	Secreted, Extracellular space, Extracellular matrix, Basement membrane	Q9HB63 NET4_HUMAN Netrin-4 Q9HB63,B2RNC2,Q658K9,Q7L3F1,Q7L9D6,Q7Z5B6,Q9BZP1,Q9NT44,Q9P133 Beta-netrin, Hepar-derived netrin-like protein	laminin complex, plasma membrane		http://zinc.docking.org/results/combination?filter.purchasability=purchasable&annotation.name=NET4_HUMAN	http://cansar.icr.ac.uk/cansar/molecular-targets/Q9HB63/				0	0	0	0	0	0	0	-3	59
	P04843	RPN1	Dolichyl-diphosphooligosaccharide--protein glycosyltransferase subunit 1		RPN1_HUMAN, RPN1	Endoplasmic reticulum, Endoplasmic reticulum membrane, Melanosome	P04843 RPN1_HUMAN Dolichyl-diphosphooligosaccharide--protein glycosyltransferase subunit 1 P04843,B2R5Z0,D3DNB6,Q68DT1 Dolichyl-diphosphooligosaccharide--protein glycosyltransferase 67 kDa subunit, Ribophorin I, Ribophorin-1	cytosol, endoplasmic reticulum, endoplasmic reticulum membrane, integral component of membrane, melanosome, membrane, oligosaccharyltransferase complex, rough endoplasmic reticulum	OST1 family	http://zinc.docking.org/results/combination?filter.purchasability=purchasable&annotation.name=RPN1_HUMAN	http://cansar.icr.ac.uk/cansar/molecular-targets/P04843/				2	2	2	1	50	2	100	-3	59	1	1	0	0	1	0	0
	P11279	LAMP1	Lysosome-associated membrane glycoprotein 1		LAMP1_HUMAN, LAMP1	Cell membrane, Endosome membrane, Lysosome membrane, Late endosome	P11279 LAMP1_HUMAN Lysosome-associated membrane glycoprotein 1 P11279,B4DWL3,Q8WU33,Q96I40,Q9BRD2,Q9NP13 CD107 antigen-like family member A	alveolar lamellar body, autolysosome, azurophil granule membrane, cytolytic granule, cytoplasm, cytosol, dendrite, endosome membrane, external side of plasma membrane, extracellular exosome, ficolin-1-rich granule membrane, integral component of plasma membrane, integral component of synaptic vesicle membrane, late endosome, late endosome membrane, lysosomal membrane, lysosome, melanosome, membra…	LAMP family	http://zinc.docking.org/results/combination?filter.purchasability=purchasable&annotation.name=LAMP1_HUMAN	http://cansar.icr.ac.uk/cansar/molecular-targets/P11279/				0	0	0	0	0	0	0	-3	59
	Q9UHI5	SLC7A8	Large neutral amino acids transporter small subunit 2		LAT2_HUMAN, SLC7A8, LAT2	Cytoplasm, Basolateral cell membrane	Q9UHI5 LAT2_HUMAN Large neutral amino acids transporter small subunit 2 Q9UHI5,B2R8Q4,B4DKT4,B4DTV6,D3DS46,F2Z2J4,Q86U05,Q9UKQ6,Q9UKQ7,Q9UKQ8,Q9Y445 L-type amino acid transporter 2, Solute carrier family 7 member 8 LAT2	basolateral plasma membrane, cytoplasm, integral component of plasma membrane, plasma membrane	L-type amino acid transporter (LAT) (TC 2.A.3.8) family	http://zinc.docking.org/results/combination?filter.purchasability=purchasable&annotation.name=LAT2_HUMAN	http://cansar.icr.ac.uk/cansar/molecular-targets/Q9UHI5/				0	0	0	0	0	0	0	-3	59	1	17	0	0	2	0	0
	P41271	NBL1	Neuroblastoma suppressor of tumorigenicity 1		NBL1_HUMAN, NBL1, DAN, DAND1	Secreted	P41271 NBL1_HUMAN Neuroblastoma suppressor of tumorigenicity 1 P41271,A3KFI7,Q5TGZ2,Q5U0N4,Q96L68 DAN domain family member 1, Protein N03, Zinc finger protein DAN DAN, DAND1	extracellular space	DAN family	http://zinc.docking.org/results/combination?filter.purchasability=purchasable&annotation.name=NBL1_HUMAN	http://cansar.icr.ac.uk/cansar/molecular-targets/P41271/				2	2	2	0	0	0	0	-3	59
	P33947	KDELR2	ER lumen protein-retaining receptor 2		ERD22_HUMAN, KDELR2, ERD2.2	Endoplasmic reticulum membrane, Golgi apparatus membrane, Cytoplasmic vesicle, COPI-coated vesicle membrane	P33947 ERD22_HUMAN ER lumen protein-retaining receptor 2 P33947,A4D2P4,Q6IPC5,Q96E30 ERD2-like protein 1, KDEL endoplasmic reticulum protein retention receptor 2 ERD2.2	cis-golgi network, copi-coated vesicle membrane, endoplasmic reticulum, endoplasmic reticulum membrane, golgi apparatus, golgi membrane, integral component of membrane, transport vesicle	ERD2 family	http://zinc.docking.org/results/combination?filter.purchasability=purchasable&annotation.name=ERD22_HUMAN	http://cansar.icr.ac.uk/cansar/molecular-targets/P33947/				0	0	0	0	0	0	0	-3	59
	P60903	S100A10	Protein S100-A10		S10AA_HUMAN, S100A10, ANX2LG, CAL1L, CLP11		P60903 S10AA_HUMAN Protein S100-A10 P60903,A8K4V8,P08206,Q5T1C5 Calpactin I light chain, Calpactin-1 light chain, Cellular ligand of annexin II, S100 calcium-binding protein A10, p10 protein, p11 ANX2LG, CAL1L, CLP11	anxa2-p11 complex, collagen-containing extracellular matrix, endoplasmic reticulum, extracellular exosome, extracellular region, extrinsic component of plasma membrane	S-100 family	http://zinc.docking.org/results/combination?filter.purchasability=purchasable&annotation.name=S10AA_HUMAN	http://cansar.icr.ac.uk/cansar/molecular-targets/P60903/				7	0	7	1	15	7	100	-3	59	1	91	0	0	26	0	0
	P31946	YWHAB	14-3-3 protein beta/alpha		1433B_HUMAN, YWHAB	Cytoplasm, Melanosome, Vacuole membrane	P31946 1433B_HUMAN 14-3-3 protein beta/alpha P31946,A8K9K2,E1P616 Protein 1054, Protein kinase C inhibitor protein 1	cytoplasm, cytosol, extracellular exosome, focal adhesion, melanosome, membrane, mitochondrion, nucleus, perinuclear region of cytoplasm, transcription repressor complex, vacuolar membrane	14-3-3 family	http://zinc.docking.org/results/combination?filter.purchasability=purchasable&annotation.name=1433B_HUMAN	http://cansar.icr.ac.uk/cansar/molecular-targets/P31946/				12	2	12	10	84	12	100	-3	59	1	1	0	0	1	0	0
	P10620	MGST1	Microsomal glutathione S-transferase 1	2.5.1.18	MGST1_HUMAN, MGST1, GST12, MGST	Microsome, Mitochondrion outer membrane, Endoplasmic reticulum membrane	P10620 MGST1_HUMAN Microsomal glutathione S-transferase 1 P10620,A8K533,G5EA53 Microsomal GST-I GST12, MGST	apical part of cell, azurophil granule membrane, endoplasmic reticulum, endoplasmic reticulum membrane, integral component of membrane, mitochondrial outer membrane, mitochondrion, nucleus, peroxisomal membrane, plasma membrane	MAPEG family	http://zinc.docking.org/results/combination?filter.purchasability=purchasable&annotation.name=MGST1_HUMAN	http://cansar.icr.ac.uk/cansar/molecular-targets/P10620/				0	0	0	0	0	0	0	-3	59	1	7	0	0	6	0	0
	P10636	MAPT	Microtubule-associated protein tau		TAU_HUMAN, MAPT, MAPTL, MTBT1, TAU	Cytoplasm, Cytosol, Cell membrane, Cytoplasm, Cytoskeleton, Cell projection, Axon, Cell projection, Dendrite	P10636 TAU_HUMAN Microtubule-associated protein tau P10636,P18518,Q14799,Q15549,Q15550,Q15551,Q1RMF6,Q53YB1,Q5CZI7,Q5XWF0,Q6QT54,Q9UDJ3,Q9UMH0,Q9UQ96 Neurofibrillary tangle protein, Paired helical filament-tau MAPTL, MTBT1, TAU	axolemma, axon, axon cytoplasm, cell, cell body, cytoplasm, cytoplasmic ribonucleoprotein granule, cytosol, dendrite, dendritic spine, extracellular region, glial cell projection, growth cone, main axon, membrane raft, microtubule, microtubule cytoskeleton, mitochondrion, neurofibrillary tangle, neuron projection, neuronal cell body, nuclear periphery, nuclear speck, nucleus, plasma membrane, som…		http://zinc.docking.org/results/combination?filter.purchasability=purchasable&annotation.name=TAU_HUMAN	http://cansar.icr.ac.uk/cansar/molecular-targets/P10636/				68	14	19	0	0	1	6	-0.25	77	1	352	132	123	150	42	35
	P35544	FAU	Ubiquitin-like protein FUBI		UBIM_HUMAN, FAU		P35544 UBIM_HUMAN Ubiquitin-like protein FUBI P35544,Q9H5V4		ubiquitin family	http://zinc.docking.org/results/combination?filter.purchasability=purchasable&annotation.name=UBIM_HUMAN	http://cansar.icr.ac.uk/cansar/molecular-targets/P35544/				1	0	1	0	0	0	0	-3	59
	P62861	FAU	40S ribosomal protein S30		RS30_HUMAN, FAU		P62861 RS30_HUMAN 40S ribosomal protein S30 P62861,Q05472,Q95261,Q9H5V4 Small ribosomal subunit protein eS30	cytosol, cytosolic small ribosomal subunit, extracellular space, nucleoplasm, small ribosomal subunit	eukaryotic ribosomal protein eS30 family	http://zinc.docking.org/results/combination?filter.purchasability=purchasable&annotation.name=RS30_HUMAN	http://cansar.icr.ac.uk/cansar/molecular-targets/P62861/				18	0	18	0	0	10	56	-3	59
	P27348	YWHAQ	14-3-3 protein theta		1433T_HUMAN, YWHAQ	Cytoplasm	P27348 1433T_HUMAN 14-3-3 protein theta P27348,D6W4Z5,Q567U5,Q5TZU8,Q9UP48 14-3-3 protein T-cell, 14-3-3 protein tau, Protein HS1	cytoplasm, cytosol, extracellular exosome, focal adhesion, membrane, mitochondrion, protein-containing complex, synapse	14-3-3 family	http://zinc.docking.org/results/combination?filter.purchasability=purchasable&annotation.name=1433T_HUMAN	http://cansar.icr.ac.uk/cansar/molecular-targets/P27348/				7	3	7	7	100	7	100	-0.95	69	1	2	0	0	2	0	0
	O75339	CILP	Cartilage intermediate layer protein 1		CILP1_HUMAN, CILP	Secreted, Extracellular space, Extracellular matrix	O75339 CILP1_HUMAN Cartilage intermediate layer protein 1 O75339,B2R8F7,Q6UW99,Q8IYI5 Cartilage intermediate-layer protein	collagen-containing extracellular matrix, extracellular exosome, extracellular space		http://zinc.docking.org/results/combination?filter.purchasability=purchasable&annotation.name=CILP1_HUMAN	http://cansar.icr.ac.uk/cansar/molecular-targets/O75339/				0	0	0	0	0	0	0	1.3	93
	Q15014	MORF4L2	Mortality factor 4-like protein 2		MO4L2_HUMAN, MORF4L2, KIAA0026, MRGX	Nucleus	Q15014 MO4L2_HUMAN Mortality factor 4-like protein 2 Q15014,B3KP92,D3DXA5,Q567V0,Q8J026 MORF-related gene X protein, Protein MSL3-2, Transcription factor-like protein MRGX KIAA0026, MRGX	histone acetyltransferase complex, nua4 histone acetyltransferase complex, nucleolus, nucleoplasm, plasma membrane		http://zinc.docking.org/results/combination?filter.purchasability=purchasable&annotation.name=MO4L2_HUMAN	http://cansar.icr.ac.uk/cansar/molecular-targets/Q15014/				0	0	0	0	0	0	0	-3	59
	P62081	RPS7	40S ribosomal protein S7		RS7_HUMAN, RPS7	Cytoplasm, Cytoskeleton, Microtubule organizing center, Centrosome	P62081 RS7_HUMAN 40S ribosomal protein S7 P62081,P23821,P24818,Q57Z92,Q6IPH1 Small ribosomal subunit protein eS7	cytosol, cytosolic small ribosomal subunit, focal adhesion, membrane, microtubule organizing center, nucleolus, nucleoplasm, nucleus, protein-containing complex, ribonucleoprotein complex, ribosome, small-subunit processome, synapse	eukaryotic ribosomal protein eS7 family	http://zinc.docking.org/results/combination?filter.purchasability=purchasable&annotation.name=RS7_HUMAN	http://cansar.icr.ac.uk/cansar/molecular-targets/P62081/				26	0	26	9	35	25	97	-3	59
	P30086	PEBP1	Phosphatidylethanolamine-binding protein 1		PEBP1_HUMAN, PEBP1, PBP, PEBP	Cytoplasm	P30086 PEBP1_HUMAN Phosphatidylethanolamine-binding protein 1 P30086,B2R4S1 HCNPpp, Neuropolypeptide h3, Prostatic-binding protein, Raf kinase inhibitor protein PBP, PEBP	cytosol, extracellular exosome, nucleus	phosphatidylethanolamine-binding protein family	http://zinc.docking.org/results/combination?filter.purchasability=purchasable&annotation.name=PEBP1_HUMAN	http://cansar.icr.ac.uk/cansar/molecular-targets/P30086/				4	0	4	0	0	3	75	-3	59	1	186	1	0	175	1	0
	O15533	TAPBP	Tapasin		TPSN_HUMAN, TAPBP, NGS17, TAPA	Endoplasmic reticulum membrane	O15533 TPSN_HUMAN Tapasin O15533,A2AB91,A2ABC0,B0V003,B0V0A6,B2ZUA4,E9PGM2,O15210,O15272,Q5STJ8,Q5STK6,Q5STQ5,Q5STQ6,Q66K65,Q96KK7,Q9HAN8,Q9UEE0,Q9UEE4,Q9UIZ6,Q9Y6K2 NGS-17, TAP-associated protein, TAP-binding protein NGS17, TAPA	endoplasmic reticulum, endoplasmic reticulum membrane, endoplasmic reticulum-golgi intermediate compartment membrane, golgi membrane, integral component of lumenal side of endoplasmic reticulum membrane, integral component of membrane, mhc class i peptide loading complex, phagocytic vesicle membrane		http://zinc.docking.org/results/combination?filter.purchasability=purchasable&annotation.name=TPSN_HUMAN	http://cansar.icr.ac.uk/cansar/molecular-targets/O15533/				2	1	2	2	100	2	100	-3	59
	P48643	CCT5	T-complex protein 1 subunit epsilon		TCPE_HUMAN, CCT5, CCTE, KIAA0098	Cytoplasm, Cytoplasm, Cytoskeleton, Microtubule organizing center, Centrosome	P48643 TCPE_HUMAN T-complex protein 1 subunit epsilon P48643,A8JZY8,A8K2X8,B4DYD8 CCT-epsilon CCTE, KIAA0098	cell body, centrosome, chaperonin-containing t-complex, cytosol, extracellular exosome, microtubule	TCP-1 chaperonin family	http://zinc.docking.org/results/combination?filter.purchasability=purchasable&annotation.name=TCPE_HUMAN	http://cansar.icr.ac.uk/cansar/molecular-targets/P48643/				9	2	9	9	100	9	100	-3	59	1	1	0	0	1	0	0
	P09211	GSTP1	Glutathione S-transferase P	2.5.1.18	GSTP1_HUMAN, GSTP1, FAEES3, GST3	Cytoplasm, Mitochondrion, Nucleus	P09211 GSTP1_HUMAN Glutathione S-transferase P P09211,O00460,Q15690,Q5TZY3 GST class-pi, GSTP1-1 FAEES3, GST3	cytoplasm, cytosol, extracellular exosome, extracellular region, extracellular space, ficolin-1-rich granule lumen, mitochondrion, nucleus, plasma membrane, secretory granule lumen, traf2-gstp1 complex, vesicle	Pi family	http://zinc.docking.org/results/combination?filter.purchasability=purchasable&annotation.name=GSTP1_HUMAN	http://cansar.icr.ac.uk/cansar/molecular-targets/P09211/				65	62	65	53	82	65	100	-0.95	69	1	826	248	137	295	80	40
	P04632	CAPNS1	Calpain small subunit 1		CPNS1_HUMAN, CAPNS1, CAPN4, CAPNS	Cytoplasm, Cell membrane	P04632 CPNS1_HUMAN Calpain small subunit 1 P04632,A8K0P1,Q8WTX3,Q96EW0 Calcium-activated neutral proteinase small subunit, Calcium-dependent protease small subunit, Calcium-dependent protease small subunit 1, Calpain regulatory subunit CAPN4, CAPNS	cytosol, extracellular exosome, membrane, plasma membrane		http://zinc.docking.org/results/combination?filter.purchasability=purchasable&annotation.name=CPNS1_HUMAN	http://cansar.icr.ac.uk/cansar/molecular-targets/P04632/				9	6	9	2	23	9	100	1.25	92	1	175	12	8	69	3	2
	P55209	NAP1L1	Nucleosome assembly protein 1-like 1		NP1L1_HUMAN, NAP1L1, NRP	Nucleus, Melanosome, Cytoplasm	P55209 NP1L1_HUMAN Nucleosome assembly protein 1-like 1 P55209,B3KNT8,B3KV44 NAP-1-related protein NRP	cytoplasm, melanosome, membrane, nucleus	nucleosome assembly protein (NAP) family	http://zinc.docking.org/results/combination?filter.purchasability=purchasable&annotation.name=NP1L1_HUMAN	http://cansar.icr.ac.uk/cansar/molecular-targets/P55209/				0	0	0	0	0	0	0	-3	59
	P63173	RPL38	60S ribosomal protein L38		RL38_HUMAN, RPL38		P63173 RL38_HUMAN 60S ribosomal protein L38 P63173,B2R5A8,P23411 Large ribosomal subunit protein eL38	cytosol, cytosolic large ribosomal subunit, eukaryotic 80s initiation complex, focal adhesion, polysomal ribosome, postsynaptic density	eukaryotic ribosomal protein eL38 family	http://zinc.docking.org/results/combination?filter.purchasability=purchasable&annotation.name=RL38_HUMAN	http://cansar.icr.ac.uk/cansar/molecular-targets/P63173/				0	0	0	0	0	0	0	-3	59
	P07942	LAMB1	Laminin subunit beta-1		LAMB1_HUMAN, LAMB1	Secreted, Extracellular space, Extracellular matrix, Basement membrane	P07942 LAMB1_HUMAN Laminin subunit beta-1 P07942,Q14D91 Laminin B1 chain, Laminin-1 subunit beta, Laminin-10 subunit beta, Laminin-12 subunit beta, Laminin-2 subunit beta, Laminin-6 subunit beta, Laminin-8 subunit beta	basement membrane, collagen-containing extracellular matrix, endoplasmic reticulum lumen, extracellular exosome, extracellular region, extracellular space, laminin complex, laminin-1 complex, laminin-10 complex, laminin-2 complex, laminin-8 complex, perinuclear region of cytoplasm		http://zinc.docking.org/results/combination?filter.purchasability=purchasable&annotation.name=LAMB1_HUMAN	http://cansar.icr.ac.uk/cansar/molecular-targets/P07942/				1	0	1	0	0	0	0	0.4	84
	Q13444	ADAM15	Disintegrin and metalloproteinase domain-containing protein 15	3.4.24.-	ADA15_HUMAN, ADAM15, MDC15	Endomembrane system, Cell junction, Adherens junction, Cell projection, Cilium, Flagellum, Cytoplasmic vesicle, Secretory vesicle, Acrosome	Q13444 ADA15_HUMAN Disintegrin and metalloproteinase domain-containing protein 15 Q13444,B3KQU5,B4DLB5,B4DMH8,E9PN65,Q13493,Q53XQ0,Q5SR68,Q5SR69,Q6R267,Q71S61,Q71S62,Q71S63,Q71S64,Q71S65,Q71S66,Q71S67,Q71S68,Q71S69,Q96C78,U3KQL5 Metalloprotease RGD disintegrin protein, Metalloproteinase-like, disintegrin-like, and cysteine-rich protein 15, Metargidin MDC15	acrosomal vesicle, adherens junction, cell surface, extracellular exosome, integral component of membrane, motile cilium, plasma membrane		http://zinc.docking.org/results/combination?filter.purchasability=purchasable&annotation.name=ADA15_HUMAN	http://cansar.icr.ac.uk/cansar/molecular-targets/Q13444/				0	0	0	0	0	0	0	1.1	91	1	2	0	0	2	0	0
	P78545	ELF3	ETS-related transcription factor Elf-3		ELF3_HUMAN, ELF3, ERT, ESX, JEN	Cytoplasm, Nucleus	P78545 ELF3_HUMAN ETS-related transcription factor Elf-3 P78545,B2R5Q6,Q6IAP8,Q7RU03,Q7Z3X2,Q8NFG2,Q99718 E74-like factor 3, Epithelial-restricted with serine box, Epithelium-restricted Ets protein ESX, Epithelium-specific Ets transcription factor 1 ERT, ESX, JEN	cytosol, golgi apparatus, host cell nucleus, nuclear chromatin, nucleoplasm, nucleus	ETS family	http://zinc.docking.org/results/combination?filter.purchasability=purchasable&annotation.name=ELF3_HUMAN	http://cansar.icr.ac.uk/cansar/molecular-targets/P78545/				1	0	1	0	0	1	100	-3	59	1	8	0	0	6	0	0
	Q86VI4	LAPTM4B	Lysosomal-associated transmembrane protein 4B		LAP4B_HUMAN, LAPTM4B	Endomembrane system, Late endosome membrane, Cell membrane, Cell projection, Lysosome membrane, Endosome membrane, Endosome, Multivesicular body membrane, Endosome, Multivesicular body lumen	Q86VI4 LAP4B_HUMAN Lysosomal-associated transmembrane protein 4B Q86VI4,Q3ZCV5,Q7L909,Q86VH8,Q9H060 Lysosome-associated transmembrane protein 4-beta	cell projection, early endosome, endosome, integral component of membrane, late endosome membrane, lysosomal membrane, lysosome, multivesicular body membrane, multivesicular body, plasma membrane	LAPTM4/LAPTM5 transporter family	http://zinc.docking.org/results/combination?filter.purchasability=purchasable&annotation.name=LAP4B_HUMAN	http://cansar.icr.ac.uk/cansar/molecular-targets/Q86VI4/				0	0	0	0	0	0	0	-3	59
	P50897	PPT1	Palmitoyl-protein thioesterase 1	3.1.2.22	PPT1_HUMAN, PPT1, CLN1, PPT	Lysosome, Secreted	P50897 PPT1_HUMAN Palmitoyl-protein thioesterase 1 P50897,B4DY24,Q6FGQ4 Palmitoyl-protein hydrolase 1 CLN1, PPT	axon, cytosol, dendrite, extracellular exosome, extracellular region, golgi apparatus, intracellular membrane-bounded organelle, lysosomal lumen, lysosome, membrane, membrane raft, neuronal cell body, nucleus, synaptic vesicle	palmitoyl-protein thioesterase family	http://zinc.docking.org/results/combination?filter.purchasability=purchasable&annotation.name=PPT1_HUMAN	http://cansar.icr.ac.uk/cansar/molecular-targets/P50897/				1	0	1	0	0	1	100	-3	59	1	5	0	0	5	0	0
	O43852	CALU	Calumenin		CALU_HUMAN, CALU	Endoplasmic reticulum membrane, Golgi apparatus, Secreted, Melanosome, Sarcoplasmic reticulum lumen	O43852 CALU_HUMAN Calumenin O43852,B3KPG9,D6QS48,D6QS49,D6QS50,D6QS51,D6QS52,D6QS53,D6QS54,D6QS55,D6QS56,D6QS57,D6QS58,D6QS59,F5H1Q9,F5H879,O60456,Q6FHB9,Q96RL3,Q9NR43 Crocalbin, IEF SSP 9302	endoplasmic reticulum, endoplasmic reticulum lumen, endoplasmic reticulum membrane, extracellular region, golgi apparatus, melanosome, membrane, sarcoplasmic reticulum lumen	CREC family	http://zinc.docking.org/results/combination?filter.purchasability=purchasable&annotation.name=CALU_HUMAN	http://cansar.icr.ac.uk/cansar/molecular-targets/O43852/				0	0	0	0	0	0	0	-1.6	63
	O43760	SYNGR2	Synaptogyrin-2		SNG2_HUMAN, SYNGR2	Cytoplasmic vesicle membrane, Cytoplasmic vesicle, Secretory vesicle, Synaptic vesicle membrane, Lipid droplet	O43760 SNG2_HUMAN Synaptogyrin-2 O43760,O43762,Q3KQZ2,Q658S7 Cellugyrin	extracellular exosome, integral component of membrane, lipid droplet, neuromuscular junction, synaptic vesicle membrane	synaptogyrin family	http://zinc.docking.org/results/combination?filter.purchasability=purchasable&annotation.name=SNG2_HUMAN	http://cansar.icr.ac.uk/cansar/molecular-targets/O43760/				0	0	0	0	0	0	0	-3	59
	Q14195	DPYSL3	Dihydropyrimidinase-related protein 3		DPYL3_HUMAN, DPYSL3, CRMP4, DRP3, ULIP, ULIP1	Cytoplasm, Cell projection, Growth cone	Q14195 DPYL3_HUMAN Dihydropyrimidinase-related protein 3 Q14195,B3SXQ8,Q93012 Collapsin response mediator protein 4, Unc-33-like phosphoprotein 1 CRMP4, DRP3, ULIP, ULIP1	cell body, cytosol, exocytic vesicle, extracellular space, filamentous actin, growth cone, lamellipodium, synapse	Hydantoinase/dihydropyrimidinase family	http://zinc.docking.org/results/combination?filter.purchasability=purchasable&annotation.name=DPYL3_HUMAN	http://cansar.icr.ac.uk/cansar/molecular-targets/Q14195/	76.71|Q16555|DPYSL2|Erlosamide|Whole:::Protein	76.71|Q16555|DPYSL2|Erlosamide|Whole:::Protein	76.71|Q16555|DPYSL2|Erlosamide|Whole:::Protein	4	0	4	4	100	4	100	-3	59
	P07195	LDHB	L-lactate dehydrogenase B chain	1.1.1.27	LDHB_HUMAN, LDHB	Cytoplasm	P07195 LDHB_HUMAN L-lactate dehydrogenase B chain P07195 LDH heart subunit, Renal carcinoma antigen NY-REN-46	cytoplasm, cytosol, extracellular exosome, membrane, membrane raft	LDH family	http://zinc.docking.org/results/combination?filter.purchasability=purchasable&annotation.name=LDHB_HUMAN	http://cansar.icr.ac.uk/cansar/molecular-targets/P07195/				2	2	2	2	100	2	100	-1.2	66	1	179	8	3	62	8	3
	P04179	SOD2	Superoxide dismutase [Mn], mitochondrial	1.15.1.1	SODM_HUMAN, SOD2	Mitochondrion matrix	P04179 SODM_HUMAN Superoxide dismutase [Mn], mitochondrial P04179,B2R7R1,B3KUK2,B4DL20,B4E3K9,E1P5A9,P78434,Q16792,Q5TCM1,Q96EE6,Q9P2Z3	extracellular exosome, mitochondrial matrix, mitochondrion	iron/manganese superoxide dismutase family	http://zinc.docking.org/results/combination?filter.purchasability=purchasable&annotation.name=SODM_HUMAN	http://cansar.icr.ac.uk/cansar/molecular-targets/P04179/				30	4	30	0	0	5	17	-1.7	61	1	13	0	0	1	0	0
	P49137	MAPKAPK2	MAP kinase-activated protein kinase 2	2.7.11.1	MAPK2_HUMAN, MAPKAPK2	Cytoplasm, Nucleus	P49137 MAPK2_HUMAN MAP kinase-activated protein kinase 2 P49137,Q5SY30,Q5SY41,Q8IYD6	centrosome, cytoplasm, cytosol, extracellular exosome, nucleoplasm, nucleus	CAMK Ser/Thr protein kinase family	http://zinc.docking.org/results/combination?filter.purchasability=purchasable&annotation.name=MAPK2_HUMAN	http://cansar.icr.ac.uk/cansar/molecular-targets/P49137/	29.86|P11802|CDK4|Ribociclib Succinate,Ribociclib,Palbociclib,Abemaciclib|Whole:::Protein			26	20	25	16	64	25	100	1.55	95	1	2749	251	195	1615	127	103
	O15027	SEC16A	Protein transport protein Sec16A		SC16A_HUMAN, SEC16A, KIAA0310, SEC16, SEC16L	Endoplasmic reticulum membrane, Golgi apparatus membrane, Cytoplasm, Perinuclear region, Cytoplasm, Cytosol, Microsome membrane	O15027 SC16A_HUMAN Protein transport protein Sec16A O15027,A1YCA4,J3KNL6,Q4G0D7,Q5SXP0,Q5SXP1,Q8N347,Q96HP1 SEC16 homolog A KIAA0310, SEC16, SEC16L	cytosol, endoplasmic reticulum, endoplasmic reticulum exit site, endoplasmic reticulum membrane, er to golgi transport vesicle membrane, golgi apparatus, golgi membrane, organelle membrane, perinuclear region of cytoplasm	SEC16 family	http://zinc.docking.org/results/combination?filter.purchasability=purchasable&annotation.name=SC16A_HUMAN	http://cansar.icr.ac.uk/cansar/molecular-targets/O15027/				0	0	0	0	0	0	0	-3	59	1	1	0	0	1	0	0
	P98095	FBLN2	Fibulin-2		FBLN2_HUMAN, FBLN2	Secreted, Extracellular space, Extracellular matrix	P98095 FBLN2_HUMAN Fibulin-2 P98095,B7Z9C5,Q8IUI0,Q8IUI1	collagen-containing extracellular matrix, extracellular matrix, extracellular region, extracellular vesicle	fibulin family	http://zinc.docking.org/results/combination?filter.purchasability=purchasable&annotation.name=FBLN2_HUMAN	http://cansar.icr.ac.uk/cansar/molecular-targets/P98095/				0	0	0	0	0	0	0	1.2	92
	Q15417	CNN3	Calponin-3		CNN3_HUMAN, CNN3		Q15417 CNN3_HUMAN Calponin-3 Q15417,B4DFK6,B4DP09,F8WA86,Q6FHA7 Calponin, acidic isoform	actin cytoskeleton, adherens junction, cytosol, dendritic spine, focal adhesion, neuronal cell body, postsynaptic density	calponin family	http://zinc.docking.org/results/combination?filter.purchasability=purchasable&annotation.name=CNN3_HUMAN	http://cansar.icr.ac.uk/cansar/molecular-targets/Q15417/				0	0	0	0	0	0	0	0.9	89
	P52565	ARHGDIA	Rho GDP-dissociation inhibitor 1		GDIR1_HUMAN, ARHGDIA, GDIA1	Cytoplasm	P52565 GDIR1_HUMAN Rho GDP-dissociation inhibitor 1 P52565,A8MXW0,B2R5X1,B4DDD3,B4DUV9,Q6IBM5 Rho-GDI alpha GDIA1	cytoskeleton, cytosol, extracellular exosome, membrane	Rho GDI family	http://zinc.docking.org/results/combination?filter.purchasability=purchasable&annotation.name=GDIR1_HUMAN	http://cansar.icr.ac.uk/cansar/molecular-targets/P52565/				20	2	20	4	20	19	95	-3	59
	Q14789	GOLGB1	Golgin subfamily B member 1		GOGB1_HUMAN, GOLGB1	Golgi apparatus membrane	Q14789 GOGB1_HUMAN Golgin subfamily B member 1 Q14789,B2ZZ91,D3DN92,E7EP74,F1T0J2,Q14398 372 kDa Golgi complex-associated protein, Giantin, Macrogolgin	cis-golgi network, endoplasmic reticulum-golgi intermediate compartment, golgi apparatus, golgi membrane, golgi stack, integral component of membrane, membrane		http://zinc.docking.org/results/combination?filter.purchasability=purchasable&annotation.name=GOGB1_HUMAN	http://cansar.icr.ac.uk/cansar/molecular-targets/Q14789/				0	0	0	0	0	0	0	1.9	97
	P22314	UBA1	Ubiquitin-like modifier-activating enzyme 1	6.2.1.45	UBA1_HUMAN, UBA1, A1S9T, UBE1	Cytoplasm, Mitochondrion, Nucleus, Nucleus, Cytoplasm	P22314 UBA1_HUMAN Ubiquitin-like modifier-activating enzyme 1 P22314,Q5JRR8,Q96E13 Protein A1S9, Ubiquitin-activating enzyme E1 A1S9T, UBE1	cytoplasm, cytosol, extracellular exosome, mitochondrion, nucleoplasm, nucleus	ubiquitin-activating E1 family	http://zinc.docking.org/results/combination?filter.purchasability=purchasable&annotation.name=UBA1_HUMAN	http://cansar.icr.ac.uk/cansar/molecular-targets/P22314/				2	1	2	2	100	2	100	-1.55	63	1	155	93	32	64	39	11
	Q6P996	PDXDC1	Pyridoxal-dependent decarboxylase domain-containing protein 1	4.1.1.-	PDXD1_HUMAN, PDXDC1, KIAA0251		Q6P996 PDXD1_HUMAN Pyridoxal-dependent decarboxylase domain-containing protein 1 Q6P996,B4DR55,B4DSL3,E7EMH5,E7EPL4,H3BNZ1,O00236,Q4F6X7,Q6PID7,Q86YF1,Q8N4Q9,Q8TBS5 KIAA0251	endoplasmic reticulum, golgi apparatus, intracellular membrane-bounded organelle	group II decarboxylase family	http://zinc.docking.org/results/combination?filter.purchasability=purchasable&annotation.name=PDXD1_HUMAN	http://cansar.icr.ac.uk/cansar/molecular-targets/Q6P996/				0	0	0	0	0	0	0	0	80
	Q6WKZ4	RAB11FIP1	Rab11 family-interacting protein 1		RFIP1_HUMAN, RAB11FIP1, RCP	Recycling endosome, Cytoplasmic vesicle, Phagosome membrane	Q6WKZ4 RFIP1_HUMAN Rab11 family-interacting protein 1 Q6WKZ4,J3KNP0,Q307T1,Q6AZK4,Q6WKZ2,Q6WKZ6,Q86YV4,Q8TDL1,Q9H642 Rab-coupling protein RCP	cytosol, intracellular membrane-bounded organelle, phagocytic vesicle membrane, recycling endosome		http://zinc.docking.org/results/combination?filter.purchasability=purchasable&annotation.name=RFIP1_HUMAN	http://cansar.icr.ac.uk/cansar/molecular-targets/Q6WKZ4/				1	0	1	0	0	0	0	-3	59
	P56270	MAZ	Myc-associated zinc finger protein		MAZ_HUMAN, MAZ, ZNF801	Nucleus	P56270 MAZ_HUMAN Myc-associated zinc finger protein P56270,A8QJL9,C6G496,G5E927,H3BQD6,Q15703,Q8NFN7,Q99443 Pur-1, Purine-binding transcription factor, Serum amyloid A-activating factor-1, Transcription factor Zif87, ZF87, Zinc finger protein 801 ZNF801	nucleus		http://zinc.docking.org/results/combination?filter.purchasability=purchasable&annotation.name=MAZ_HUMAN	http://cansar.icr.ac.uk/cansar/molecular-targets/P56270/				0	0	0	0	0	0	0	-3	59
	Q13636	RAB31	Ras-related protein Rab-31		RAB31_HUMAN, RAB31, RAB22B	Golgi apparatus, Trans-Golgi network, Golgi apparatus, Trans-Golgi network membrane, Early endosome, Cytoplasmic vesicle, Phagosome, Cytoplasmic vesicle, Phagosome membrane	Q13636 RAB31_HUMAN Ras-related protein Rab-31 Q13636,B2RBT7,Q15770,Q9HC00 Ras-related protein Rab-22B RAB22B	cytosol, early endosome, early endosome membrane, early phagosome membrane, endomembrane system, phagocytic cup, phagocytic vesicle, plasma membrane, secretory granule membrane, trans-golgi network membrane	Rab family	http://zinc.docking.org/results/combination?filter.purchasability=purchasable&annotation.name=RAB31_HUMAN	http://cansar.icr.ac.uk/cansar/molecular-targets/Q13636/				1	1	1	0	0	1	100	-3	59
	Q9BWL3	C1orf43	Protein C1orf43		CA043_HUMAN, C1orf43, NICE3, NS5ATP4	Membrane, Golgi apparatus, Mitochondrion	Q9BWL3 CA043_HUMAN Protein C1orf43 Q9BWL3,A8K3G8,D3DV72,D3DV74,Q5M801,Q5VU73,Q5VU83,Q96HP7,Q9UFU2,Q9UGL7,Q9UGL8,Q9Y2R6 Hepatitis C virus NS5A-transactivated protein 4, Protein NICE-3, S863-3 NICE3, NS5ATP4	golgi apparatus, integral component of membrane, mitochondrion		http://zinc.docking.org/results/combination?filter.purchasability=purchasable&annotation.name=CA043_HUMAN	http://cansar.icr.ac.uk/cansar/molecular-targets/Q9BWL3/				0	0	0	0	0	0	0	-3	59
	P04440	HLA-DPB1	HLA class II histocompatibility antigen, DP beta 1 chain		DPB1_HUMAN, HLA-DPB1, HLA-DP1B	Cell membrane, Endoplasmic reticulum membrane, Golgi apparatus, Trans-Golgi network membrane, Endosome membrane, Lysosome membrane	P04440 DPB1_HUMAN HLA class II histocompatibility antigen, DP beta 1 chain P04440,A0PFJ7,A5I886,A8YPB3,B5U8B4,B7VF80,B7VF87,B8ZX68,B8ZYT0,B9W5S8,B9W6F7,B9W6F9,C0MPP5,C0MPQ2,C0MPQ3,C0MPQ5,C0MPQ6,C0MPQ7,C4R9J5,C5IZL1,O00259,O19698,O19700,O19702,O19749,O46884,O77952,O98215,O98216,O98217,O98218,O98219,O98222,O98223,P01916,P04232,P13763,P79493,P79608,Q0P0L4,Q0ZFN3,Q14279,Q27S71,Q29682,Q29684,Q29698,Q2…	cell surface, clathrin-coated endocytic vesicle membrane, endocytic vesicle membrane, endosome membrane, er to golgi transport vesicle membrane, golgi membrane, integral component of lumenal side of endoplasmic reticulum membrane, lysosomal membrane, membrane, mhc class ii protein complex, plasma membrane, trans-golgi network membrane, transport vesicle membrane	MHC class II family	http://zinc.docking.org/results/combination?filter.purchasability=purchasable&annotation.name=DPB1_HUMAN	http://cansar.icr.ac.uk/cansar/molecular-targets/P04440/				6	3	6	0	0	6	100	-3	59
	P38646	HSPA9	Stress-70 protein, mitochondrial		GRP75_HUMAN, HSPA9, GRP75, HSPA9B, mt-HSP70	Mitochondrion, Nucleus, Nucleolus	P38646 GRP75_HUMAN Stress-70 protein, mitochondrial P38646,B2RCM1,P30036,P31932,Q1HB43,Q53H23,Q6GU03,Q9BWB7,Q9UC56 75 kDa glucose-regulated protein, Heat shock 70 kDa protein 9, Mortalin, Peptide-binding protein 74 GRP75, HSPA9B, mt-HSP70	cytoplasm, extracellular exosome, focal adhesion, mib complex, mitochondrial matrix, mitochondrial nucleoid, mitochondrion, nucleolus, sam complex	heat shock protein 70 family	http://zinc.docking.org/results/combination?filter.purchasability=purchasable&annotation.name=GRP75_HUMAN	http://cansar.icr.ac.uk/cansar/molecular-targets/P38646/				5	3	5	5	100	5	100	-3	59
	P15559	NQO1	NAD(P)H dehydrogenase [quinone] 1	1.6.5.2	NQO1_HUMAN, NQO1, DIA4, NMOR1	Cytoplasm	P15559 NQO1_HUMAN NAD(P)H dehydrogenase [quinone] 1 P15559,B2R5Y9,B4DNM7,B7ZAD1,Q86UK1 Azoreductase, DT-diaphorase, Menadione reductase, NAD(P)H:quinone oxidoreductase 1, Phylloquinone reductase, Quinone reductase 1 DIA4, NMOR1	cytoplasm, cytosol, dendrite, neuronal cell body, synapse	NAD(P)H dehydrogenase (quinone) family	http://zinc.docking.org/results/combination?filter.purchasability=purchasable&annotation.name=NQO1_HUMAN	http://cansar.icr.ac.uk/cansar/molecular-targets/P15559/				17	17	17	1	6	16	95	1.15	92	1	729	26	21	247	12	8
	O00391	QSOX1	Sulfhydryl oxidase 1	1.8.3.2	QSOX1_HUMAN, QSOX1, QSCN6	Golgi apparatus membrane, Secreted, Secreted	O00391 QSOX1_HUMAN Sulfhydryl oxidase 1 O00391,Q59G29,Q5T2X0,Q8TDL6,Q8WVP4 Quiescin Q6 QSCN6	endoplasmic reticulum lumen, extracellular exosome, extracellular region, extracellular space, golgi apparatus, golgi membrane, integral component of golgi membrane, intercellular bridge, intracellular membrane-bounded organelle, platelet alpha granule lumen, specific granule lumen, tertiary granule lumen	quiescin-sulfhydryl oxidase (QSOX) family	http://zinc.docking.org/results/combination?filter.purchasability=purchasable&annotation.name=QSOX1_HUMAN	http://cansar.icr.ac.uk/cansar/molecular-targets/O00391/				4	3	4	2	50	3	75	-3	59
	P17931	LGALS3	Galectin-3		LEG3_HUMAN, LGALS3, MAC2	Cytoplasm, Nucleus, Secreted	P17931 LEG3_HUMAN Galectin-3 P17931,B2RC38,Q16005,Q6IBA7,Q96J47 35 kDa lectin, Carbohydrate-binding protein 35, Galactose-specific lectin 3, Galactoside-binding protein, IgE-binding protein, L-31, Laminin-binding protein, Lectin L-29, Mac-2 antigen MAC2	cell surface, collagen-containing extracellular matrix, cytoplasm, extracellular exosome, extracellular region, extracellular space, ficolin-1-rich granule membrane, immunological synapse, membrane, mitochondrial inner membrane, nucleus, other organism cell, plasma membrane, secretory granule membrane, spliceosomal complex		http://zinc.docking.org/results/combination?filter.purchasability=purchasable&annotation.name=LEG3_HUMAN	http://cansar.icr.ac.uk/cansar/molecular-targets/P17931/				88	50	81	0	0	14	18	-3	59	1	231	17	0	128	8	0
	Q9UM54	MYO6	Unconventional myosin-VI		MYO6_HUMAN, MYO6, KIAA0389	Golgi apparatus, Trans-Golgi network membrane, Golgi apparatus, Nucleus, Cytoplasm, Perinuclear region, Membrane, Clathrin-coated pit, Cytoplasmic vesicle, Clathrin-coated vesicle, Cell projection, Filopodium, Cell projection, Ruffle membrane, Cell projection, Microvillus, Cytoplasm, Cytosol, Cytoplasmic vesicle, Clathrin-coated vesicle membrane, Cytoplasmic vesicle, Clathrin-coated vesicle membr…	Q9UM54 MYO6_HUMAN Unconventional myosin-VI Q9UM54,A6H8V4,E1P540,Q5TEM5,Q5TEM6,Q5TEM7,Q9BZZ7,Q9UEG2 Unconventional myosin-6 KIAA0389	actin cytoskeleton, actin filament, apical part of cell, cell cortex, cell projection, clathrin-coated pit, clathrin-coated vesicle membrane, cytoplasm, cytoplasmic vesicle, cytosol, endocytic vesicle, extracellular exosome, filamentous actin, filopodium, golgi apparatus, lysosomal membrane, membrane, microvillus, nuclear membrane, nucleoplasm, nucleus, perinuclear region of cytoplasm, plasma mem…	Myosin family	http://zinc.docking.org/results/combination?filter.purchasability=purchasable&annotation.name=MYO6_HUMAN	http://cansar.icr.ac.uk/cansar/molecular-targets/Q9UM54/				7	0	7	2	29	6	86	-3	59
	P63241	EIF5A	Eukaryotic translation initiation factor 5A-1		IF5A1_HUMAN, EIF5A	Cytoplasm, Nucleus, Endoplasmic reticulum membrane, Nucleus, Nuclear pore complex	P63241 IF5A1_HUMAN Eukaryotic translation initiation factor 5A-1 P63241,A8K9A0,D3DTP2,P10159,Q16182,Q7L7L3,Q7Z4L1,Q9D0G2 Eukaryotic initiation factor 5A isoform 1, Rev-binding factor, eIF-4D	annulate lamellae, cytoplasm, cytosol, endoplasmic reticulum membrane, membrane, nuclear pore, nucleus	eIF-5A family	http://zinc.docking.org/results/combination?filter.purchasability=purchasable&annotation.name=IF5A1_HUMAN	http://cansar.icr.ac.uk/cansar/molecular-targets/P63241/				2	1	2	0	0	2	100	-3	59	1	1	0	0	1	0	0
	Q9H4A3	WNK1	Serine/threonine-protein kinase WNK1	2.7.11.1	WNK1_HUMAN, WNK1, HSN2, KDP, KIAA0344, PRKWNK1	Cytoplasm	Q9H4A3 WNK1_HUMAN Serine/threonine-protein kinase WNK1 Q9H4A3,A1L4B0,C5HTZ5,C5HTZ6,C5HTZ7,H6WZW3,O15052,P54963,Q4VBX9,Q6IFS5,Q86WL5,Q8N673,Q96CZ6,Q9P1S9 Erythrocyte 65 kDa protein, Kinase deficient protein, Protein kinase lysine-deficient 1, Protein kinase with no lysine 1 HSN2, KDP, KIAA0344, PRKWNK1	cytoplasm, cytosol, membrane	Ser/Thr protein kinase family	http://zinc.docking.org/results/combination?filter.purchasability=purchasable&annotation.name=WNK1_HUMAN	http://cansar.icr.ac.uk/cansar/molecular-targets/Q9H4A3/	34.38|P23458|JAK1|Upadacitinib,Ruxolitinib Phosphate,Ruxolitinib,Baricitinib|Whole:::Protein			8	4	7	5	72	6	86	-1.9	59	1	62	4	2	49	3	1
	O00571	DDX3X	ATP-dependent RNA helicase DDX3X	3.6.4.13	DDX3X_HUMAN, DDX3X, DBX, DDX3	Cell membrane, Nucleus, Cytoplasm, Cytoplasm, Stress granule, Inflammasome, Cell projection, Lamellipodium, Cytoplasm, Cytoskeleton, Microtubule organizing center, Centrosome	O00571 DDX3X_HUMAN ATP-dependent RNA helicase DDX3X O00571,A8K538,B4E3E8,O15536 CAP-Rf, DEAD box protein 3, X-chromosomal, DEAD box, X isoform, Helicase-like protein 2 DBX, DDX3	cell leading edge, centrosome, cytoplasm, cytoplasmic stress granule, cytosol, extracellular exosome, extracellular region, ficolin-1-rich granule lumen, lamellipodium, nlrp3 inflammasome complex, nucleoplasm, nucleus, p granule, plasma membrane, secretory granule lumen	DEAD box helicase family	http://zinc.docking.org/results/combination?filter.purchasability=purchasable&annotation.name=DDX3X_HUMAN	http://cansar.icr.ac.uk/cansar/molecular-targets/O00571/				13	6	9	6	67	9	100	1.15	92	1	275	0	0	237	0	0
	P51572	BCAP31	B-cell receptor-associated protein 31		BAP31_HUMAN, BCAP31, BAP31, DXS1357E	Endoplasmic reticulum membrane, Endoplasmic reticulum-Golgi intermediate compartment membrane	P51572 BAP31_HUMAN B-cell receptor-associated protein 31 P51572,B3KQ79,D3DWV5,Q13836,Q96CF0 6C6-AG tumor-associated antigen, Protein CDM, p28 BAP31, DXS1357E	clathrin-coated vesicle, cytosol, endoplasmic reticulum, endoplasmic reticulum membrane, endoplasmic reticulum-golgi intermediate compartment membrane, golgi cisterna membrane, integral component of lumenal side of endoplasmic reticulum membrane, integral component of plasma membrane, lipid droplet, membrane, mitochondrion, perinuclear endoplasmic reticulum	BCAP29/BCAP31 family	http://zinc.docking.org/results/combination?filter.purchasability=purchasable&annotation.name=BAP31_HUMAN	http://cansar.icr.ac.uk/cansar/molecular-targets/P51572/				2	0	2	0	0	0	0	-3	59
	P61160	ACTR2	Actin-related protein 2		ARP2_HUMAN, ACTR2, ARP2	Cytoplasm, Cytoskeleton, Cell projection, Nucleus	P61160 ARP2_HUMAN Actin-related protein 2 P61160,B2RCP5,D6W5F4,E9PF41,O15142,Q96C82 Actin-like protein 2 ARP2	actin cap, actin cytoskeleton, arp2/3 protein complex, azurophil granule lumen, cytoplasm, cytosol, extracellular exosome, extracellular region, ficolin-1-rich granule lumen, focal adhesion, invadopodium, lamellipodium, membrane, nucleus, podosome core, postsynaptic density, site of double-strand break	actin family	http://zinc.docking.org/results/combination?filter.purchasability=purchasable&annotation.name=ARP2_HUMAN	http://cansar.icr.ac.uk/cansar/molecular-targets/P61160/				22	15	22	10	46	16	73	-3	59	1	241	1	0	222	1	0
	P55072	VCP	Transitional endoplasmic reticulum ATPase	3.6.4.6	TERA_HUMAN, VCP	Cytoplasm, Cytosol, Endoplasmic reticulum, Nucleus, Cytoplasm, Stress granule	P55072 TERA_HUMAN Transitional endoplasmic reticulum ATPase P55072,B2R5T8,Q0V924,Q2TAI5,Q969G7,Q9UCD5 15S Mg(2+)-ATPase p97 subunit, Valosin-containing protein	atpase complex, azurophil granule lumen, cytoplasm, cytoplasmic stress granule, cytosol, derlin-1 retrotranslocation complex, endoplasmic reticulum, endoplasmic reticulum membrane, extracellular exosome, extracellular region, ficolin-1-rich granule lumen, glutamatergic synapse, intracellular membrane-bounded organelle, lipid droplet, nucleoplasm, nucleus, perinuclear region of cytoplasm, proteaso…	AAA ATPase family	http://zinc.docking.org/results/combination?filter.purchasability=purchasable&annotation.name=TERA_HUMAN	http://cansar.icr.ac.uk/cansar/molecular-targets/P55072/				45	33	42	25	60	42	100	0.1	81	1	424	19	9	143	11	8
	P08865	RPSA	40S ribosomal protein SA		RSSA_HUMAN, RPSA, LAMBR, LAMR1	Cell membrane, Cytoplasm, Nucleus	P08865 RSSA_HUMAN 40S ribosomal protein SA P08865,P11085,P12030,Q16471,Q6IPD1,Q6IPD2,Q6NSD1,Q6NXQ8,Q86VC0 37 kDa laminin receptor precursor, 37/67 kDa laminin receptor, 67 kDa laminin receptor, Colon carcinoma laminin-binding protein, Laminin receptor 1, Laminin-binding protein precursor p40, Multidrug resistance-associated protein MGr1-Ag, NEM/1CHD4, Small ribosomal subunit protein uS2 LAMBR, LA…	cytoplasm, cytosol, cytosolic small ribosomal subunit, extracellular exosome, membrane, nucleoplasm, nucleus, plasma membrane	universal ribosomal protein uS2 family	http://zinc.docking.org/results/combination?filter.purchasability=purchasable&annotation.name=RSSA_HUMAN	http://cansar.icr.ac.uk/cansar/molecular-targets/P08865/				21	0	21	3	15	12	58	-3	59	1	34	0	0	20	0	0
	Q8TD06	AGR3	Anterior gradient protein 3		AGR3_HUMAN, AGR3, BCMP11, PDIA18	Endoplasmic reticulum	Q8TD06 AGR3_HUMAN Anterior gradient protein 3 Q8TD06,A4D120 Anterior gradient 3 homolog, Breast cancer membrane protein 11, Protein disulfide isomerase family A, member 18 BCMP11, PDIA18	endoplasmic reticulum, intracellular membrane-bounded organelle	AGR family	http://zinc.docking.org/results/combination?filter.purchasability=purchasable&annotation.name=AGR3_HUMAN	http://cansar.icr.ac.uk/cansar/molecular-targets/Q8TD06/				1	0	1	0	0	1	100	-3	59
	P11388	TOP2A	DNA topoisomerase 2-alpha	5.6.2.2	TOP2A_HUMAN, TOP2A, TOP2	Cytoplasm, Nucleus, Nucleoplasm	P11388 TOP2A_HUMAN DNA topoisomerase 2-alpha P11388,B2RTS1,Q71UN1,Q71UQ5,Q9HB24,Q9HB25,Q9HB26,Q9UP44,Q9UQP9 DNA topoisomerase II, alpha isozyme TOP2	condensed chromosome, cytoplasm, dna topoisomerase type ii (double strand cut, nucleolus, nucleoplasm, nucleus, protein-containing complex, ribonucleoprotein complex, viral integration complex	type II topoisomerase family	http://zinc.docking.org/results/combination?filter.purchasability=purchasable&annotation.name=TOP2A_HUMAN	http://cansar.icr.ac.uk/cansar/molecular-targets/P11388/	100.00|P11388|TOP2A|Valrubicin,Teniposide,Pixantrone,Mitoxantrone Hydrochloride,Mitoxantrone,Idarubicin Hydrochloride,Idarubicin,Etoposide Phosphate,Etoposide,Doxorubicin Hydrochloride,Doxorubicin,Daunorubicin Citrate,Daunorubicin Hydrochloride,Daunorubicin,Dactinomycin|Whole:::Protein	100.00|P11388|TOP2A|Valrubicin,Teniposide,Pixantrone,Mitoxantrone Hydrochloride,Mitoxantrone,Idarubicin Hydrochloride,Idarubicin,Etoposide Phosphate,Etoposide,Doxorubicin Hydrochloride,Doxorubicin,Daunorubicin Citrate,Daunorubicin Hydrochloride,Daunorubicin,Dactinomycin|Whole:::Protein||74.55|Q02880|TOP2B|Teniposide|Whole:::Protein	100.00|P11388|TOP2A|Valrubicin,Teniposide,Pixantrone,Mitoxantrone Hydrochloride,Mitoxantrone,Idarubicin Hydrochloride,Idarubicin,Etoposide Phosphate,Etoposide,Doxorubicin Hydrochloride,Doxorubicin,Daunorubicin Citrate,Daunorubicin Hydrochloride,Daunorubicin,Dactinomycin|Whole:::Protein||74.55|Q02880|TOP2B|Teniposide|Whole:::Protein	6	4	5	5	100	5	100	0.7	87	1	3345	4	2	1200	3	2
	Q8TF66	LRRC15	Leucine-rich repeat-containing protein 15		LRC15_HUMAN, LRRC15, LIB	Membrane	Q8TF66 LRC15_HUMAN Leucine-rich repeat-containing protein 15 Q8TF66,Q495Q6,Q7RTN7 Leucine-rich repeat protein induced by beta-amyloid homolog LIB	extracellular exosome, extracellular matrix, extracellular space, integral component of membrane		http://zinc.docking.org/results/combination?filter.purchasability=purchasable&annotation.name=LRC15_HUMAN	http://cansar.icr.ac.uk/cansar/molecular-targets/Q8TF66/	31.09|Q9NYK1|TLR7|Imiquimod|Whole:::Protein			0	0	0	0	0	0	0	-3	59
	P61247	RPS3A	40S ribosomal protein S3a		RS3A_HUMAN, RPS3A, FTE1, MFTL	Cytoplasm, Nucleus	P61247 RS3A_HUMAN 40S ribosomal protein S3a P61247,B2R4D4,D3DP05,P33443,P49241 Small ribosomal subunit protein eS1, v-fos transformation effector protein FTE1, MFTL	cytoplasm, cytosol, cytosolic small ribosomal subunit, endoplasmic reticulum, extracellular exosome, focal adhesion, nucleolus, nucleoplasm, nucleus, ribonucleoprotein complex, synapse	eukaryotic ribosomal protein eS1 family	http://zinc.docking.org/results/combination?filter.purchasability=purchasable&annotation.name=RS3A_HUMAN	http://cansar.icr.ac.uk/cansar/molecular-targets/P61247/				20	0	20	6	30	12	60	-3	59
	P18848	ATF4	Cyclic AMP-dependent transcription factor ATF-4		ATF4_HUMAN, ATF4, CREB2, TXREB	Nucleus, Nucleus speckle, Cytoplasm, Cell membrane, Cytoplasm, Cytoskeleton, Microtubule organizing center, Centrosome	P18848 ATF4_HUMAN Cyclic AMP-dependent transcription factor ATF-4 P18848,Q96AQ3,Q9UH31 Activating transcription factor 4, Cyclic AMP-responsive element-binding protein 2, Tax-responsive enhancer element-binding protein 67 CREB2, TXREB	atf1-atf4 transcription factor complex, atf4-creb1 transcription factor complex, chop-atf4 complex, cytoplasm, dendrite membrane, lewy body core, microtubule organizing center, neuron projection, nuclear chromatin, nuclear periphery, nuclear speck, nucleoplasm, nucleus, protein-containing complex	bZIP family	http://zinc.docking.org/results/combination?filter.purchasability=purchasable&annotation.name=ATF4_HUMAN	http://cansar.icr.ac.uk/cansar/molecular-targets/P18848/				1	0	1	0	0	0	0	-3	59
	P05204	HMGN2	Non-histone chromosomal protein HMG-17		HMGN2_HUMAN, HMGN2, HMG17	Nucleus, Cytoplasm	P05204 HMGN2_HUMAN Non-histone chromosomal protein HMG-17 P05204,Q0VGD5,Q6FGI5,Q96C64 High mobility group nucleosome-binding domain-containing protein 2 HMG17	chromatin, cytoplasm, extracellular space, nucleus	HMGN family	http://zinc.docking.org/results/combination?filter.purchasability=purchasable&annotation.name=HMGN2_HUMAN	http://cansar.icr.ac.uk/cansar/molecular-targets/P05204/				0	0	0	0	0	0	0	-3	59
	Q9BQE3	TUBA1C	Tubulin alpha-1C chain		TBA1C_HUMAN, TUBA1C, TUBA6	Cytoplasm, Cytoskeleton	Q9BQE3 TBA1C_HUMAN Tubulin alpha-1C chain Q9BQE3 Alpha-tubulin 6, Tubulin alpha-6 chain TUBA6	cytoplasm, microtubule, microtubule cytoskeleton, nucleus, vesicle	tubulin family	http://zinc.docking.org/results/combination?filter.purchasability=purchasable&annotation.name=TBA1C_HUMAN	http://cansar.icr.ac.uk/cansar/molecular-targets/Q9BQE3/	100.00|Q9BQE3|TUBA1C|Docetaxel,Docetaxel|Whole:::Protein	100.00|Q9BQE3|TUBA1C|Docetaxel,Docetaxel|Whole:::Protein||99.31|P68363|TUBA1B|Docetaxel,Docetaxel|Whole:::Protein||99.31|Q71U36|TUBA1A|Vinflunine,Vindesine Sulfate,Vindesine,Docetaxel,Docetaxel|Whole:::Protein||96.99|P68366|TUBA4A|Docetaxel,Docetaxel,Colchicine|Whole:::Protein||96.52|Q6PEY2|TUBA3E|Docetaxel,Docetaxel|Whole:::Protein	100.00|Q9BQE3|TUBA1C|Docetaxel,Docetaxel|Whole:::Protein||99.31|P68363|TUBA1B|Docetaxel,Docetaxel|Whole:::Protein||99.31|Q71U36|TUBA1A|Vinflunine,Vindesine Sulfate,Vindesine,Docetaxel,Docetaxel|Whole:::Protein||96.99|P68366|TUBA4A|Docetaxel,Docetaxel,Colchicine|Whole:::Protein||96.52|Q6PEY2|TUBA3E|Docetaxel,Docetaxel|Whole:::Protein||42.36|P12456|mec-7|Mebendazole|Whole:::Protein||41.71|P21148|TB…	0	0	0	0	0	0	0	0.7	87	1	1753	16	12	709	14	10
	P29972	AQP1	Aquaporin-1		AQP1_HUMAN, AQP1, CHIP28	Cell membrane	P29972 AQP1_HUMAN Aquaporin-1 P29972,B5BU39,E7EM69,E9PC21,F5GY19,Q8TBI5,Q8TDC1 Aquaporin-CHIP, Urine water channel, Water channel protein for red blood cells and kidney proximal tubule CHIP28	apical part of cell, apical plasma membrane, basal plasma membrane, basolateral plasma membrane, brush border, brush border membrane, cytoplasm, extracellular exosome, integral component of membrane, integral component of plasma membrane, nuclear membrane, nucleus, plasma membrane, sarcolemma, symbiont-containing vacuole	MIP/aquaporin (TC 1.A.8) family	http://zinc.docking.org/results/combination?filter.purchasability=purchasable&annotation.name=AQP1_HUMAN	http://cansar.icr.ac.uk/cansar/molecular-targets/P29972/				5	0	5	3	60	5	100	-3	59	1	6	0	0	3	0	0
	Q06828	FMOD	Fibromodulin		FMOD_HUMAN, FMOD, FM, SLRR2E	Secreted, Extracellular space, Extracellular matrix	Q06828 FMOD_HUMAN Fibromodulin Q06828,Q15331,Q8IV47 Collagen-binding 59 kDa protein, Keratan sulfate proteoglycan fibromodulin FM, SLRR2E	collagen-containing extracellular matrix, extracellular matrix, extracellular region, extracellular space, golgi lumen, lysosomal lumen	small leucine-rich proteoglycan (SLRP) family	http://zinc.docking.org/results/combination?filter.purchasability=purchasable&annotation.name=FMOD_HUMAN	http://cansar.icr.ac.uk/cansar/molecular-targets/Q06828/				1	0	1	0	0	1	100	-1.3	65
	P0DP23	CALM1	Calmodulin-1		CALM1_HUMAN, CALM1, CALM, CAM, CAM1	Cytoplasm, Cytoskeleton, Spindle, Cytoplasm, Cytoskeleton, Spindle pole, Cytoplasm, Cytoskeleton, Microtubule organizing center, Centrosome	P0DP23 CALM1_HUMAN Calmodulin-1 P0DP23,P02593,P62158,P70667,P99014,Q13942,Q53S29,Q61379,Q61380,Q96HK3 CALM, CAM, CAM1	calcium channel complex, catalytic complex, centrosome, cytoplasm, cytosol, extracellular region, nucleoplasm, nucleus, plasma membrane, protein-containing complex, sarcomere, spindle microtubule, spindle pole, vesicle	calmodulin family	http://zinc.docking.org/results/combination?filter.purchasability=purchasable&annotation.name=CALM1_HUMAN	http://cansar.icr.ac.uk/cansar/molecular-targets/P0DP23/	50.99|P63316|TNNC1|Bepridil Hydrochloride,Bepridil|Whole:::Protein	50.99|P63316|TNNC1|Bepridil Hydrochloride,Bepridil|Whole:::Protein	50.99|P63316|TNNC1|Bepridil Hydrochloride,Bepridil|Whole:::Protein	197	24	196	102	53	189	97			1	54	5	0	32	5	0
	P48729	CSNK1A1	Casein kinase I isoform alpha	2.7.11.1	KC1A_HUMAN, CSNK1A1	Cytoplasm, Cytoplasm, Cytoskeleton, Microtubule organizing center, Centrosome, Chromosome, Centromere, Kinetochore, Nucleus speckle, Cytoplasm, Cytoskeleton, Cilium basal body	P48729 KC1A_HUMAN Casein kinase I isoform alpha P48729,D3DQG0,D3DQG1,Q4JJA0,Q5U046,Q5U047,Q6FGA2,Q71TU5,Q96HD2,Q9UDK3 CK1	beta-catenin destruction complex, centrosome, ciliary basal body, cilium, condensed chromosome kinetochore, cytoplasm, cytosol, membrane, nuclear speck, nucleus, ribonucleoprotein complex	CK1 Ser/Thr protein kinase family	http://zinc.docking.org/results/combination?filter.purchasability=purchasable&annotation.name=KC1A_HUMAN	http://cansar.icr.ac.uk/cansar/molecular-targets/P48729/				2	1	2	1	50	2	100	1.15	92	1	1019	8	8	709	7	7
	Q96SA4	SERINC2	Serine incorporator 2		SERC2_HUMAN, SERINC2, TDE2L	Membrane	Q96SA4 SERC2_HUMAN Serine incorporator 2 Q96SA4,A0AVB4,B4DJK5,B7Z567,B7ZAP2,E7EUZ9,Q86Y23 Tumor differentially expressed protein 2-like TDE2L	extracellular exosome, integral component of membrane, membrane	TDE1 family	http://zinc.docking.org/results/combination?filter.purchasability=purchasable&annotation.name=SERC2_HUMAN	http://cansar.icr.ac.uk/cansar/molecular-targets/Q96SA4/				0	0	0	0	0	0	0	-3	59
	P62140	PPP1CB	Serine/threonine-protein phosphatase PP1-beta catalytic subunit	3.1.3.16	PP1B_HUMAN, PPP1CB	Cytoplasm, Nucleus, Nucleus, Nucleoplasm, Nucleus, Nucleolus	P62140 PP1B_HUMAN Serine/threonine-protein phosphatase PP1-beta catalytic subunit P62140,B2R5V4,D6W565,P37140,Q5U087,Q6FG45	cytoplasm, cytosol, extracellular exosome, focal adhesion, glycogen granule, nucleolus, nucleoplasm, nucleus, plasma membrane, protein phosphatase type 1 complex, ptw/pp1 phosphatase complex	PPP phosphatase family	http://zinc.docking.org/results/combination?filter.purchasability=purchasable&annotation.name=PP1B_HUMAN	http://cansar.icr.ac.uk/cansar/molecular-targets/P62140/				1	1	1	0	0	1	100	-3	59	1	2	0	0	1	0	0
	P04216	THY1	Thy-1 membrane glycoprotein		THY1_HUMAN, THY1	Cell membrane	P04216 THY1_HUMAN Thy-1 membrane glycoprotein P04216,Q16008,Q9NSP1 CDw90, Thy-1 antigen	anchored component of external side of plasma membrane, apical plasma membrane, axolemma, cell surface, cytosol, dendrite, dendrite membrane, endoplasmic reticulum, external side of plasma membrane, extracellular exosome, extracellular region, focal adhesion, growth cone, integral component of plasma membrane, membrane raft, neuronal cell body membrane, plasma membrane		http://zinc.docking.org/results/combination?filter.purchasability=purchasable&annotation.name=THY1_HUMAN	http://cansar.icr.ac.uk/cansar/molecular-targets/P04216/				0	0	0	0	0	0	0	-3	59
	P04275	VWF	von Willebrand factor		VWF_HUMAN, VWF, F8VWF	Secreted, Secreted, Extracellular space, Extracellular matrix	P04275 VWF_HUMAN von Willebrand factor P04275,Q8TCE8,Q99806 F8VWF	collagen-containing extracellular matrix, endoplasmic reticulum, extracellular exosome, extracellular region, platelet alpha granule, platelet alpha granule lumen, weibel-palade body		http://zinc.docking.org/results/combination?filter.purchasability=purchasable&annotation.name=VWF_HUMAN	http://cansar.icr.ac.uk/cansar/molecular-targets/P04275/				31	5	30	6	20	20	67	-1	68	1	10	0	0	10	0	0
	Q96BI3	APH1A	Gamma-secretase subunit APH-1A		APH1A_HUMAN, APH1A, PSF	Endoplasmic reticulum membrane, Golgi apparatus, Golgi stack membrane	Q96BI3 APH1A_HUMAN Gamma-secretase subunit APH-1A Q96BI3,B4DQK0,Q5TB22,Q5TB23,Q969R6,Q9BVG0,Q9Y386 Aph-1alpha, Presenilin-stabilization factor PSF	early endosome, endoplasmic reticulum, endoplasmic reticulum membrane, endosome membrane, gamma-secretase complex, golgi apparatus, golgi cisterna membrane, integral component of membrane, integral component of plasma membrane, integral component of presynaptic membrane, membrane, mitochondrion, plasma membrane, synaptic vesicle	APH-1 family	http://zinc.docking.org/results/combination?filter.purchasability=purchasable&annotation.name=APH1A_HUMAN	http://cansar.icr.ac.uk/cansar/molecular-targets/Q96BI3/				7	3	6	4	67	5	84	0.45	84	1	2425	855	487	973	366	196
	Q14094	CCNI	Cyclin-I		CCNI_HUMAN, CCNI	Nucleus membrane	Q14094 CCNI_HUMAN Cyclin-I Q14094,B2R6M0,B7Z6X4	cyclin-dependent protein kinase holoenzyme complex, cytoplasm, nuclear membrane, nucleus	cyclin family	http://zinc.docking.org/results/combination?filter.purchasability=purchasable&annotation.name=CCNI_HUMAN	http://cansar.icr.ac.uk/cansar/molecular-targets/Q14094/				0	0	0	0	0	0	0	-0.65	72
	Q9C0C2	TNKS1BP1	182 kDa tankyrase-1-binding protein		TB182_HUMAN, TNKS1BP1, KIAA1741, TAB182	Nucleus, Cytoplasm, Cytoskeleton, Chromosome	Q9C0C2 TB182_HUMAN 182 kDa tankyrase-1-binding protein Q9C0C2,A7E2F8,Q6PJ35,Q6ZV74 KIAA1741, TAB182	adherens junction, ccr4-not complex, cytoplasm, cytoskeleton, cytosol, nuclear heterochromatin, nucleus		http://zinc.docking.org/results/combination?filter.purchasability=purchasable&annotation.name=TB182_HUMAN	http://cansar.icr.ac.uk/cansar/molecular-targets/Q9C0C2/				0	0	0	0	0	0	0	-3	59
	P54849	EMP1	Epithelial membrane protein 1		EMP1_HUMAN, EMP1, B4B, TMP	Membrane	P54849 EMP1_HUMAN Epithelial membrane protein 1 P54849,B2R5N1,B4DRR1,O00681,Q13481,Q13834 CL-20, Protein B4B, Tumor-associated membrane protein B4B, TMP	integral component of membrane, plasma membrane	PMP-22/EMP/MP20 family	http://zinc.docking.org/results/combination?filter.purchasability=purchasable&annotation.name=EMP1_HUMAN	http://cansar.icr.ac.uk/cansar/molecular-targets/P54849/				0	0	0	0	0	0	0	-3	59
	Q14165	MLEC	Malectin		MLEC_HUMAN, MLEC, KIAA0152	Endoplasmic reticulum membrane	Q14165 MLEC_HUMAN Malectin Q14165 KIAA0152	endoplasmic reticulum, endoplasmic reticulum membrane, integral component of membrane, membrane, plasma membrane, specific granule membrane	malectin family	http://zinc.docking.org/results/combination?filter.purchasability=purchasable&annotation.name=MLEC_HUMAN	http://cansar.icr.ac.uk/cansar/molecular-targets/Q14165/				1	0	1	0	0	0	0	-3	59
	P13284	IFI30	Gamma-interferon-inducible lysosomal thiol reductase	1.8.-.-	GILT_HUMAN, IFI30, GILT, IP30	Secreted, Lysosome	P13284 GILT_HUMAN Gamma-interferon-inducible lysosomal thiol reductase P13284,Q76MF9,Q8NEI4,Q8WU77,Q9UL08 Gamma-interferon-inducible protein IP-30, Legumaturain GILT, IP30	cell junction, cytosol, extracellular region, intracellular membrane-bounded organelle, lysosomal lumen, lysosome	GILT family	http://zinc.docking.org/results/combination?filter.purchasability=purchasable&annotation.name=GILT_HUMAN	http://cansar.icr.ac.uk/cansar/molecular-targets/P13284/				0	0	0	0	0	0	0	-3	59
	Q5XXA6	ANO1	Anoctamin-1		ANO1_HUMAN, ANO1, DOG1, ORAOV2, TAOS2, TMEM16A	Cell membrane, Cytoplasm	Q5XXA6 ANO1_HUMAN Anoctamin-1 Q5XXA6,A8KAM3,Q8IYY8,Q8N7V3 Discovered on gastrointestinal stromal tumors protein 1, Oral cancer overexpressed protein 2, Transmembrane protein 16A, Tumor-amplified and overexpressed sequence 2 DOG1, ORAOV2, TAOS2, TMEM16A	apical plasma membrane, chloride channel complex, cytoplasm, extracellular exosome, integral component of plasma membrane, membrane raft, nucleoplasm, plasma membrane	anoctamin family	http://zinc.docking.org/results/combination?filter.purchasability=purchasable&annotation.name=ANO1_HUMAN	http://cansar.icr.ac.uk/cansar/molecular-targets/Q5XXA6/				0	0	0	0	0	0	0	-3	59	1	86	1	0	15	1	0
	Q03692	COL10A1	Collagen alpha-1(X) chain		COAA1_HUMAN, COL10A1	Secreted, Extracellular space, Extracellular matrix	Q03692 COAA1_HUMAN Collagen alpha-1(X) chain Q03692,A1L4P2	collagen trimer, collagen-containing extracellular matrix, endoplasmic reticulum lumen, extracellular matrix, extracellular region, extracellular space		http://zinc.docking.org/results/combination?filter.purchasability=purchasable&annotation.name=COAA1_HUMAN	http://cansar.icr.ac.uk/cansar/molecular-targets/Q03692/				1	1	1	0	0	0	0	-3	59
	P61204	ARF3	ADP-ribosylation factor 3		ARF3_HUMAN, ARF3	Golgi apparatus, Cytoplasm, Perinuclear region	P61204 ARF3_HUMAN ADP-ribosylation factor 3 P61204,A8K6G8,B7ZB63,P16587	cytoplasm, extracellular exosome, golgi membrane, perinuclear region of cytoplasm, plasma membrane	Arf family	http://zinc.docking.org/results/combination?filter.purchasability=purchasable&annotation.name=ARF3_HUMAN	http://cansar.icr.ac.uk/cansar/molecular-targets/P61204/				1	1	1	1	100	1	100	-1.75	61
	P16949	STMN1	Stathmin		STMN1_HUMAN, STMN1, C1orf215, LAP18, OP18	Cytoplasm, Cytoskeleton	P16949 STMN1_HUMAN Stathmin P16949,A2A2D1,B2R4E7,B7Z8N4,D3DPJ5 Leukemia-associated phosphoprotein p18, Metablastin, Oncoprotein 18, Phosphoprotein p19, Prosolin, Protein Pr22, pp17 C1orf215, LAP18, OP18	cytoplasm, cytosol, extracellular exosome, intracellular, membrane, microtubule, neuron projection	stathmin family	http://zinc.docking.org/results/combination?filter.purchasability=purchasable&annotation.name=STMN1_HUMAN	http://cansar.icr.ac.uk/cansar/molecular-targets/P16949/				0	0	0	0	0	0	0	-3	59	1	1	0	0	1	0	0
	Q15276	RABEP1	Rab GTPase-binding effector protein 1		RABE1_HUMAN, RABEP1, RAB5EP, RABPT5, RABPT5A	Cytoplasm, Early endosome, Recycling endosome, Cytoplasmic vesicle	Q15276 RABE1_HUMAN Rab GTPase-binding effector protein 1 Q15276,B2RAG7,O95369,Q8IVX3 Rabaptin-4, Rabaptin-5, Rabaptin-5alpha, Renal carcinoma antigen NY-REN-17 RAB5EP, RABPT5, RABPT5A	early endosome, early endosome membrane, endocytic vesicle, endosome, intracellular membrane-bounded organelle, protein-containing complex, recycling endosome	rabaptin family	http://zinc.docking.org/results/combination?filter.purchasability=purchasable&annotation.name=RABE1_HUMAN	http://cansar.icr.ac.uk/cansar/molecular-targets/Q15276/				6	0	5	0	0	1	20	-3	59
	Q15012	LAPTM4A	Lysosomal-associated transmembrane protein 4A		LAP4A_HUMAN, LAPTM4A, KIAA0108, LAPTM4, MBNT, MTRP	Endomembrane system	Q15012 LAP4A_HUMAN Lysosomal-associated transmembrane protein 4A Q15012,Q6UW22 Golgi 4-transmembrane-spanning transporter MTP KIAA0108, LAPTM4, MBNT, MTRP	golgi apparatus, integral component of membrane, late endosome membrane, lysosomal membrane	LAPTM4/LAPTM5 transporter family	http://zinc.docking.org/results/combination?filter.purchasability=purchasable&annotation.name=LAP4A_HUMAN	http://cansar.icr.ac.uk/cansar/molecular-targets/Q15012/				0	0	0	0	0	0	0	-3	59
	Q9P206	KIAA1522	Uncharacterized protein KIAA1522		K1522_HUMAN, KIAA1522		Q9P206 K1522_HUMAN Uncharacterized protein KIAA1522 Q9P206,B4DQU8,B5MDY0,C9JH84,Q8TCQ0			http://zinc.docking.org/results/combination?filter.purchasability=purchasable&annotation.name=K1522_HUMAN	http://cansar.icr.ac.uk/cansar/molecular-targets/Q9P206/				0	0	0	0	0	0	0	-3	59
	P29966	MARCKS	Myristoylated alanine-rich C-kinase substrate		MARCS_HUMAN, MARCKS, MACS, PRKCSL	Cytoplasm, Cytoskeleton, Membrane	P29966 MARCS_HUMAN Myristoylated alanine-rich C-kinase substrate P29966,E1P560,Q2LA83,Q5TDB7 Protein kinase C substrate, 80 kDa protein, light chain MACS, PRKCSL	actin cytoskeleton, actin filament bundle, cell cortex, centrosome, extracellular exosome, focal adhesion, germinal vesicle, plasma membrane	MARCKS family	http://zinc.docking.org/results/combination?filter.purchasability=purchasable&annotation.name=MARCS_HUMAN	http://cansar.icr.ac.uk/cansar/molecular-targets/P29966/				1	0	0	0	0	0	0	-3	59
	O00299	CLIC1	Chloride intracellular channel protein 1		CLIC1_HUMAN, CLIC1, G6, NCC27	Nucleus, Nucleus membrane, Cytoplasm, Cell membrane	O00299 CLIC1_HUMAN Chloride intracellular channel protein 1 O00299,Q15089,Q502X1 Chloride channel ABP, Nuclear chloride ion channel 27, Regulatory nuclear chloride ion channel protein G6, NCC27	blood microparticle, brush border, chloride channel complex, cytoplasm, extracellular exosome, extracellular space, membrane, mitochondrion, nuclear envelope, nuclear membrane, nucleus, perinuclear region of cytoplasm, plasma membrane, vesicle	chloride channel CLIC family	http://zinc.docking.org/results/combination?filter.purchasability=purchasable&annotation.name=CLIC1_HUMAN	http://cansar.icr.ac.uk/cansar/molecular-targets/O00299/				15	1	15	2	14	15	100	-3	59
	O15539	RGS5	Regulator of G-protein signaling 5		RGS5_HUMAN, RGS5	Cytoplasm, Membrane, Cytoplasm	O15539 RGS5_HUMAN Regulator of G-protein signaling 5 O15539,E9PMP5,Q53XA9,Q599J0	cytoplasm, plasma membrane		http://zinc.docking.org/results/combination?filter.purchasability=purchasable&annotation.name=RGS5_HUMAN	http://cansar.icr.ac.uk/cansar/molecular-targets/O15539/				1	0	1	0	0	1	100	-3	59
	Q71F56	MED13L	Mediator of RNA polymerase II transcription subunit 13-like		MD13L_HUMAN, MED13L, KIAA1025, PROSIT240, THRAP2, TRAP240L	Nucleus	Q71F56 MD13L_HUMAN Mediator of RNA polymerase II transcription subunit 13-like Q71F56,A1L469,Q68DN4,Q9H8C0,Q9NSY9,Q9UFD8,Q9UPX5 Mediator complex subunit 13-like, Thyroid hormone receptor-associated protein 2, Thyroid hormone receptor-associated protein complex 240 kDa component-like KIAA1025, PROSIT240, THRAP2, TRAP240L	mediator complex	Mediator complex subunit 13 family	http://zinc.docking.org/results/combination?filter.purchasability=purchasable&annotation.name=MD13L_HUMAN	http://cansar.icr.ac.uk/cansar/molecular-targets/Q71F56/				0	0	0	0	0	0	0	-3	59
	Q9Y605	MRFAP1	MORF4 family-associated protein 1		MOFA1_HUMAN, MRFAP1, PAM14, PGR1	Nucleus, Cytoplasm, Perinuclear region	Q9Y605 MOFA1_HUMAN MORF4 family-associated protein 1 Q9Y605,B3KVT2,D3DVT3 Protein PGR1, Protein associated with MRG of 14 kDa PAM14, PGR1	nucleoplasm, perinuclear region of cytoplasm	MORF4 family-associated protein family	http://zinc.docking.org/results/combination?filter.purchasability=purchasable&annotation.name=MOFA1_HUMAN	http://cansar.icr.ac.uk/cansar/molecular-targets/Q9Y605/				0	0	0	0	0	0	0	-3	59
	P63208	SKP1	S-phase kinase-associated protein 1		SKP1_HUMAN, SKP1, EMC19, OCP2, SKP1A, TCEB1L		P63208 SKP1_HUMAN S-phase kinase-associated protein 1 P63208,D3DQ97,D3DQ98,P34991,Q8TAY2 Cyclin-A/CDK2-associated protein p19, Organ of Corti protein 2, Organ of Corti protein II, RNA polymerase II elongation factor-like protein, SIII, Transcription elongation factor B polypeptide 1-like, p19skp1 EMC19, OCP2, SKP1A, TCEB1L	centrosome, cul7-ring ubiquitin ligase complex, cytoplasm, cytosol, nucleoplasm, nucleus, scf ubiquitin ligase complex	SKP1 family	http://zinc.docking.org/results/combination?filter.purchasability=purchasable&annotation.name=SKP1_HUMAN	http://cansar.icr.ac.uk/cansar/molecular-targets/P63208/				36	0	36	5	14	29	81	-3	59
	P15586	GNS	N-acetylglucosamine-6-sulfatase	3.1.6.14	GNS_HUMAN, GNS	Lysosome	P15586 GNS_HUMAN N-acetylglucosamine-6-sulfatase P15586,B4DYH8,Q53F05 Glucosamine-6-sulfatase	azurophil granule lumen, extracellular exosome, extracellular region, ficolin-1-rich granule lumen, lysosomal lumen	sulfatase family	http://zinc.docking.org/results/combination?filter.purchasability=purchasable&annotation.name=GNS_HUMAN	http://cansar.icr.ac.uk/cansar/molecular-targets/P15586/				0	0	0	0	0	0	0	-3	59
	P52943	CRIP2	Cysteine-rich protein 2		CRIP2_HUMAN, CRIP2, CRP2		P52943 CRIP2_HUMAN Cysteine-rich protein 2 P52943,A1A4U1,B7Z6C0,E9PD13 Protein ESP1 CRP2	cell cortex		http://zinc.docking.org/results/combination?filter.purchasability=purchasable&annotation.name=CRIP2_HUMAN	http://cansar.icr.ac.uk/cansar/molecular-targets/P52943/				1	0	1	0	0	0	0	-3	59
	O43768	ENSA	Alpha-endosulfine		ENSA_HUMAN, ENSA	Cytoplasm	O43768 ENSA_HUMAN Alpha-endosulfine O43768,A8K1Z9,E9PB69,Q5T5H2,Q68D48,Q6FHW0,Q6IAM4,Q6NUL2,Q6VUC6,Q6VUC7,Q6VUC8,Q6VUC9,Q6VUD0,Q6VUD1,Q9NRZ0 ARPP-19e	cytoplasm, nucleoplasm	endosulfine family	http://zinc.docking.org/results/combination?filter.purchasability=purchasable&annotation.name=ENSA_HUMAN	http://cansar.icr.ac.uk/cansar/molecular-targets/O43768/				0	0	0	0	0	0	0	-3	59
	Q9NZN5	ARHGEF12	Rho guanine nucleotide exchange factor 12		ARHGC_HUMAN, ARHGEF12, KIAA0382, LARG	Cytoplasm, Membrane	Q9NZN5 ARHGC_HUMAN Rho guanine nucleotide exchange factor 12 Q9NZN5,O15086,Q6P526 Leukemia-associated RhoGEF KIAA0382, LARG	cytoplasm, cytosol, extracellular exosome, membrane		http://zinc.docking.org/results/combination?filter.purchasability=purchasable&annotation.name=ARHGC_HUMAN	http://cansar.icr.ac.uk/cansar/molecular-targets/Q9NZN5/				4	0	4	0	0	3	75	-1.7	61
	O95197	RTN3	Reticulon-3		RTN3_HUMAN, RTN3, ASYIP, NSPL2	Endoplasmic reticulum membrane, Golgi apparatus membrane	O95197 RTN3_HUMAN Reticulon-3 O95197,B3KQS2,B7Z308,B7Z4M0,F5H774,Q147U9,Q496K2,Q53GN3,Q59EP0,Q5UEP2,Q6T930,Q7RTM7,Q7RTM8,Q7RTN3 Homolog of ASY protein, Neuroendocrine-specific protein-like 2, Neuroendocrine-specific protein-like II ASYIP, NSPL2	endoplasmic reticulum, endoplasmic reticulum membrane, extracellular space, golgi membrane, integral component of membrane, plasma membrane, synapse		http://zinc.docking.org/results/combination?filter.purchasability=purchasable&annotation.name=RTN3_HUMAN	http://cansar.icr.ac.uk/cansar/molecular-targets/O95197/				1	0	1	1	100	1	100	0.3	83
	P48735	IDH2	Isocitrate dehydrogenase [NADP], mitochondrial	1.1.1.42	IDHP_HUMAN, IDH2	Mitochondrion	P48735 IDHP_HUMAN Isocitrate dehydrogenase [NADP], mitochondrial P48735,B2R6L6,B4DFL2,Q96GT3 ICD-M, IDP, NADP(+)-specific ICDH, Oxalosuccinate decarboxylase	cytosol, extracellular exosome, mitochondrial matrix, mitochondrion, peroxisome	isocitrate and isopropylmalate dehydrogenases family	http://zinc.docking.org/results/combination?filter.purchasability=purchasable&annotation.name=IDHP_HUMAN	http://cansar.icr.ac.uk/cansar/molecular-targets/P48735/	100.00|P48735|IDH2|Enasidenib Mesylate,Enasidenib|Whole:::Protein	100.00|P48735|IDH2|Enasidenib Mesylate,Enasidenib|Whole:::Protein||69.98|O75874|IDH1|Ivosidenib|Whole:::Protein	100.00|P48735|IDH2|Enasidenib Mesylate,Enasidenib|Whole:::Protein||69.98|O75874|IDH1|Ivosidenib|Whole:::Protein	8	7	7	5	72	7	100	-3	59	1	296	246	137	134	107	66
	P18065	IGFBP2	Insulin-like growth factor-binding protein 2		IBP2_HUMAN, IGFBP2, BP2, IBP2	Secreted	P18065 IBP2_HUMAN Insulin-like growth factor-binding protein 2 P18065,Q14619,Q9UCL3 BP2, IBP2	apical plasma membrane, cytoplasmic vesicle, extracellular exosome, extracellular region, extracellular space		http://zinc.docking.org/results/combination?filter.purchasability=purchasable&annotation.name=IBP2_HUMAN	http://cansar.icr.ac.uk/cansar/molecular-targets/P18065/				1	0	1	0	0	1	100	-1.25	66	1	2	2	2	1	1	1
	P62873	GNB1	Guanine nucleotide-binding protein G(I)/G(S)/G(T) subunit beta-1		GBB1_HUMAN, GNB1		P62873 GBB1_HUMAN Guanine nucleotide-binding protein G(I)/G(S)/G(T) subunit beta-1 P62873,B1AJZ7,P04697,P04901,Q1RMY8 Transducin beta chain 1	cell body, cytoplasm, cytosol, dendrite, extracellular exosome, extracellular vesicle, heterotrimeric g-protein complex, lysosomal membrane, membrane, photoreceptor disc membrane, photoreceptor inner segment, photoreceptor outer segment membrane, plasma membrane, synapse	WD repeat G protein beta family	http://zinc.docking.org/results/combination?filter.purchasability=purchasable&annotation.name=GBB1_HUMAN	http://cansar.icr.ac.uk/cansar/molecular-targets/P62873/				85	0	84	84	100	84	100	-3	59
	P51826	AFF3	AF4/FMR2 family member 3		AFF3_HUMAN, AFF3, LAF4	Nucleus	P51826 AFF3_HUMAN AF4/FMR2 family member 3 P51826,B7ZM46,B9EGL9,D3DVI6,Q53RD6,Q53S47,Q53SI6,Q53TB9,Q59F27,Q8IWJ5 Lymphoid nuclear protein related to AF4 LAF4	cytosol, nuclear body, nucleoplasm, nucleus, super elongation complex, transcription elongation factor complex	AF4 family	http://zinc.docking.org/results/combination?filter.purchasability=purchasable&annotation.name=AFF3_HUMAN	http://cansar.icr.ac.uk/cansar/molecular-targets/P51826/				0	0	0	0	0	0	0	-1.1	67
	P62273	RPS29	40S ribosomal protein S29		RS29_HUMAN, RPS29	Cytoplasm, Cytosol, Cytoplasm, Rough endoplasmic reticulum	P62273 RS29_HUMAN 40S ribosomal protein S29 P62273,A8MZ73,P30054 Small ribosomal subunit protein uS14	cytoplasmic side of rough endoplasmic reticulum membrane, cytosol, cytosolic small ribosomal subunit, extracellular exosome, focal adhesion, nucleoplasm, polysomal ribosome, small ribosomal subunit	universal ribosomal protein uS14 family	http://zinc.docking.org/results/combination?filter.purchasability=purchasable&annotation.name=RS29_HUMAN	http://cansar.icr.ac.uk/cansar/molecular-targets/P62273/				23	0	23	0	0	1	5	-3	59
	Q13263	TRIM28	Transcription intermediary factor 1-beta	2.3.2.27	TIF1B_HUMAN, TRIM28, KAP1, RNF96, TIF1B	Nucleus	Q13263 TIF1B_HUMAN Transcription intermediary factor 1-beta Q13263,O00677,Q7Z632,Q93040,Q96IM1 E3 SUMO-protein ligase TRIM28, KRAB-associated protein 1, KRAB-interacting protein 1, Nuclear corepressor KAP-1, RING finger protein 96, RING-type E3 ubiquitin transferase TIF1-beta, Tripartite motif-containing protein 28 KAP1, RNF96, TIF1B	chromatin, nuclear euchromatin, nuclear heterochromatin, nucleoplasm, nucleus, protein-containing complex, rna polymerase ii transcription regulator complex	TRIM/RBCC family	http://zinc.docking.org/results/combination?filter.purchasability=purchasable&annotation.name=TIF1B_HUMAN	http://cansar.icr.ac.uk/cansar/molecular-targets/Q13263/				7	0	7	0	0	5	72	-3	59	1	4	0	0	3	0	0
[truncated: 8,349 more rows]
