# Supplementary figures and images for: Similarities and Differences in Gene Expression Networks Between the Breast Cancer Cell Line Michigan Cancer Foundation-7 and Invasive Human Breast Cancer Tissues
Source: Frontiers journal article supplement (doi:10.3389/frai.2021.674370), 2021-05-13

Cluster dendrogram for GSE50705

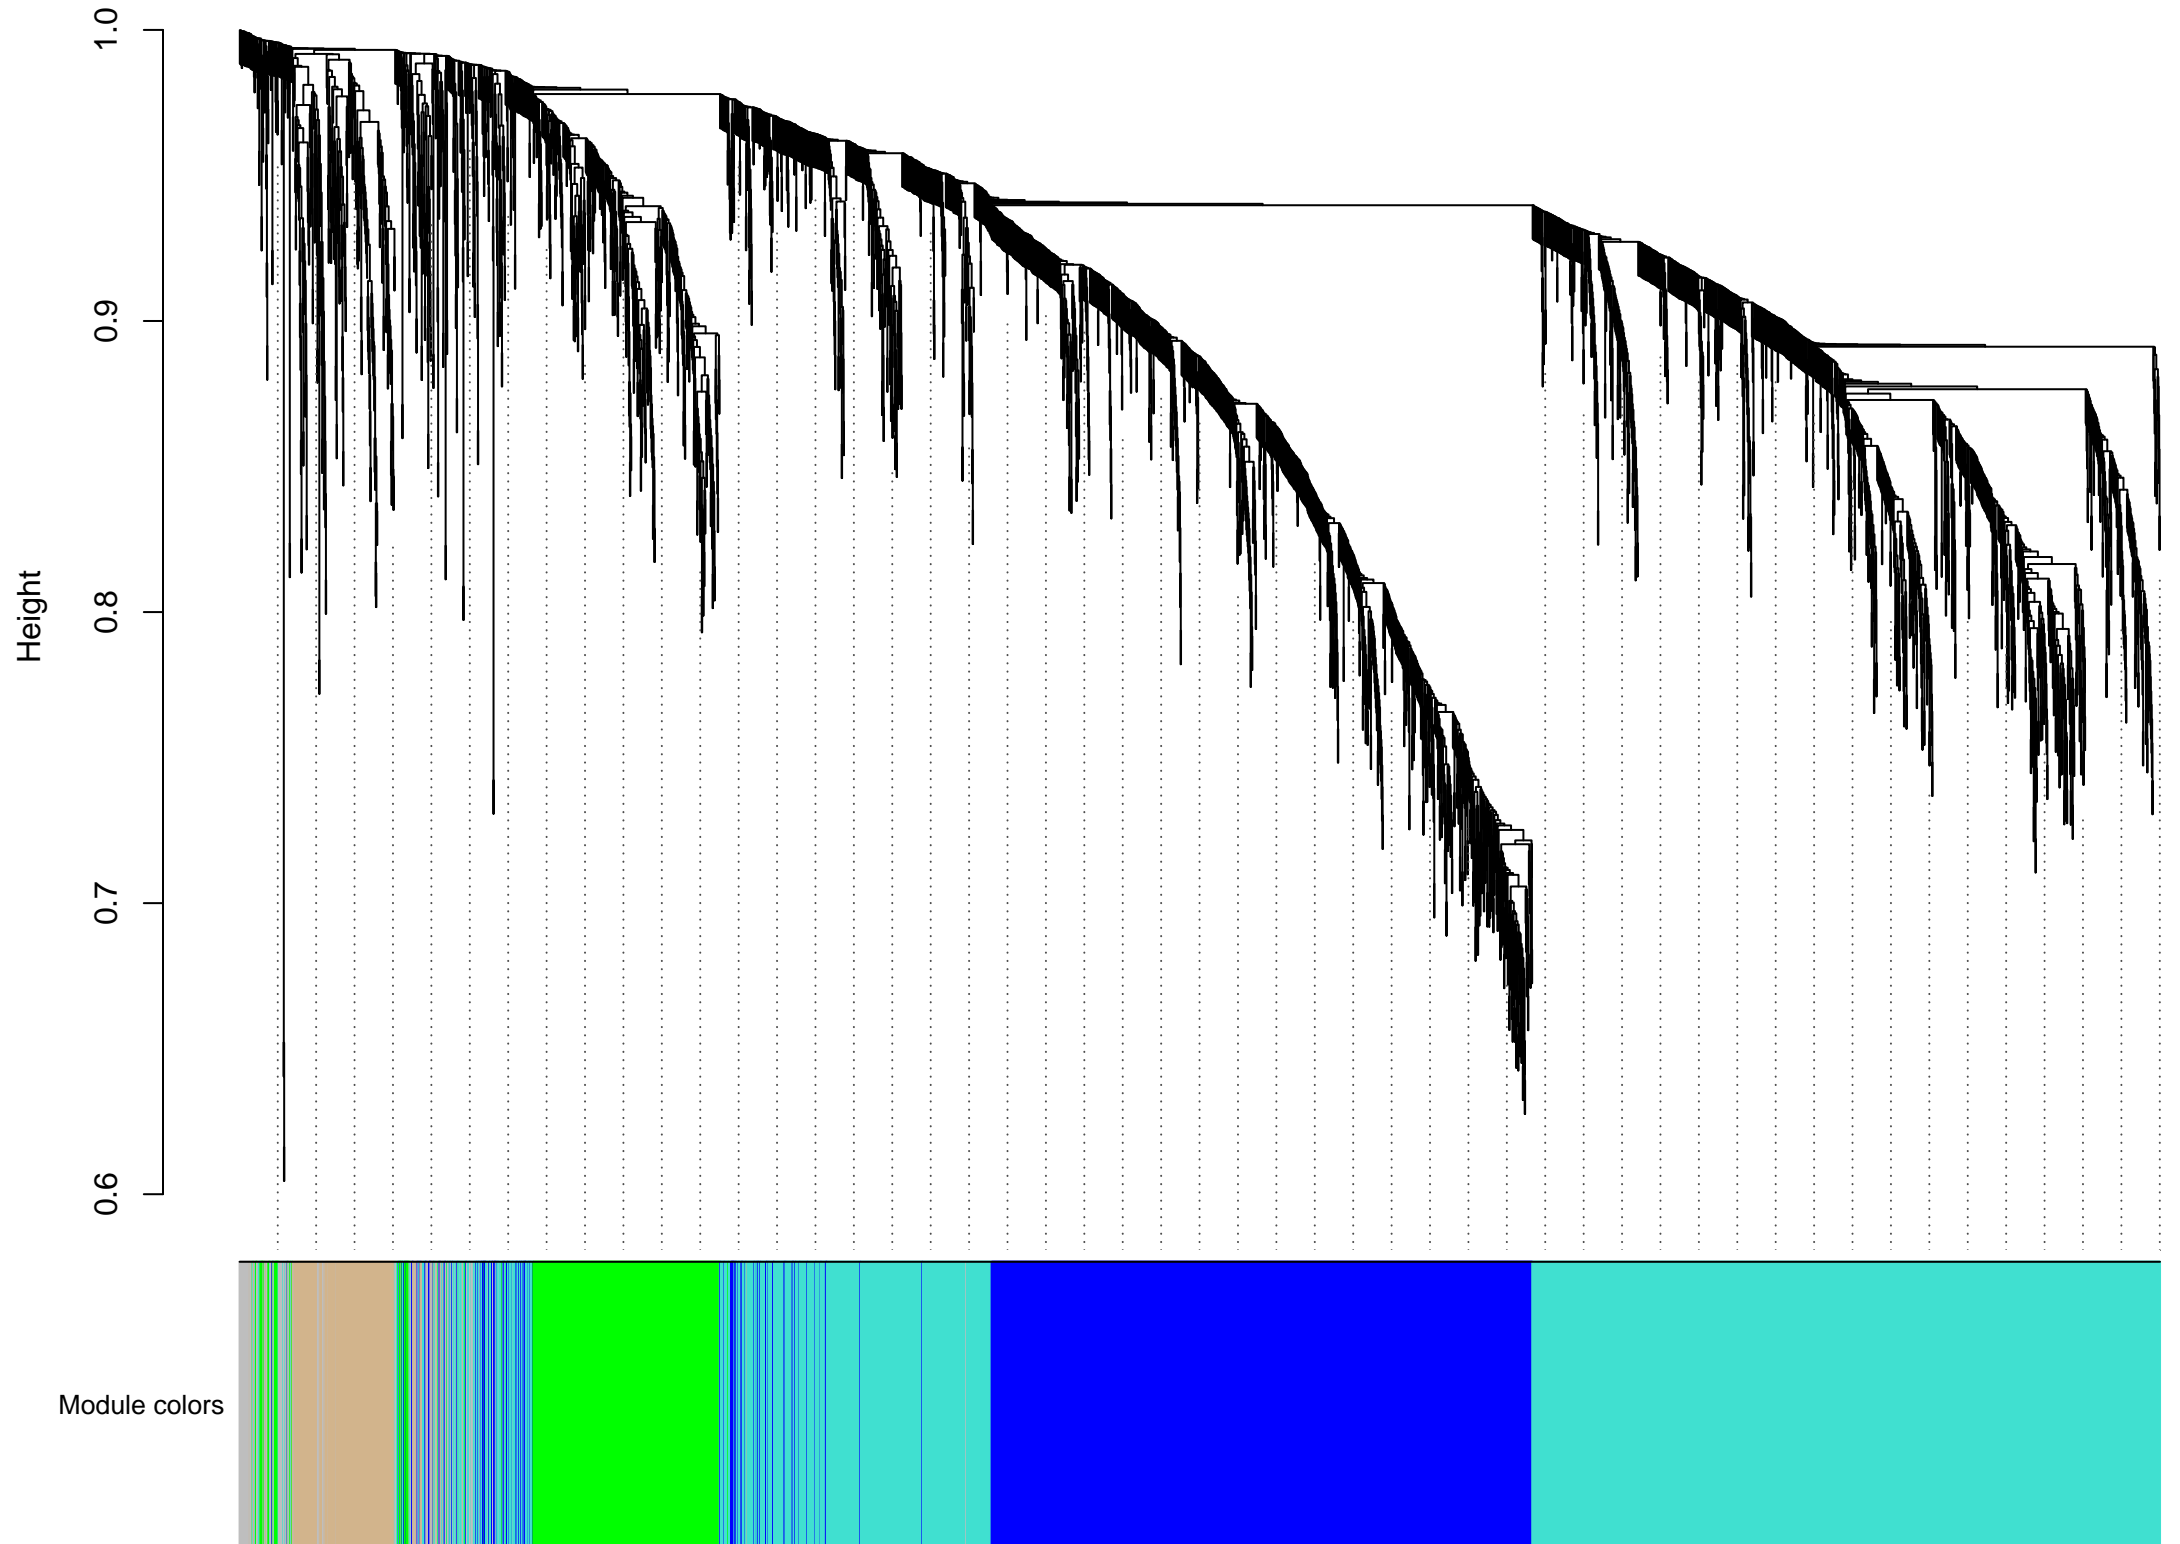

Supplement: Data_Sheet_1.zip [file Data_Sheet_1.zip]

# Cluster dendrogram for ARCHS4

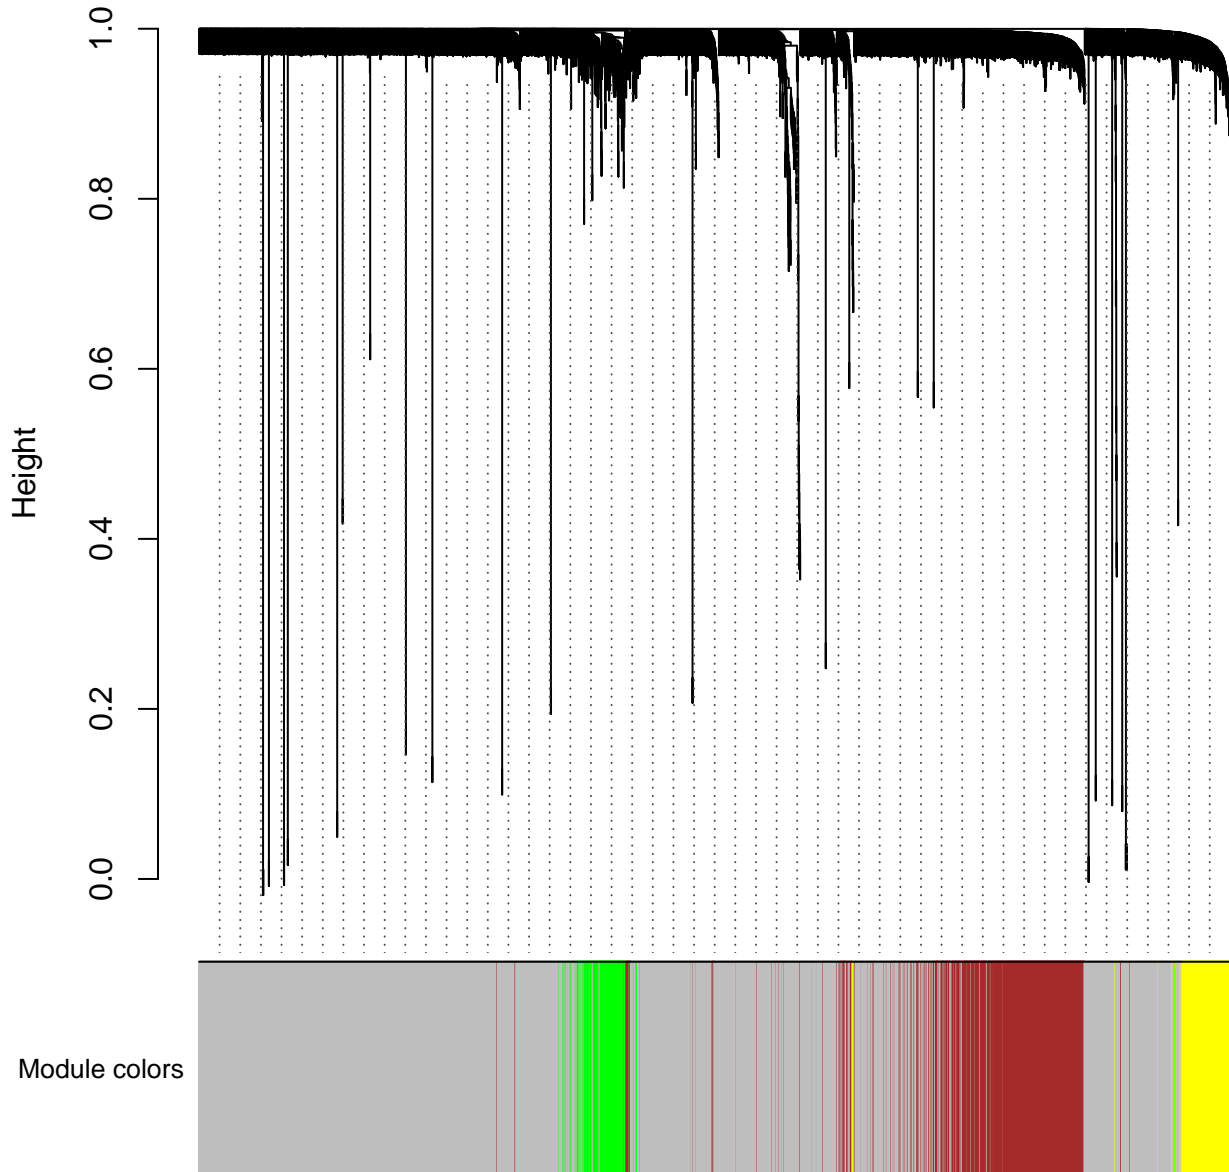

Supplement: Data_Sheet_1.zip [file Data_Sheet_1.zip]

## Scale independence

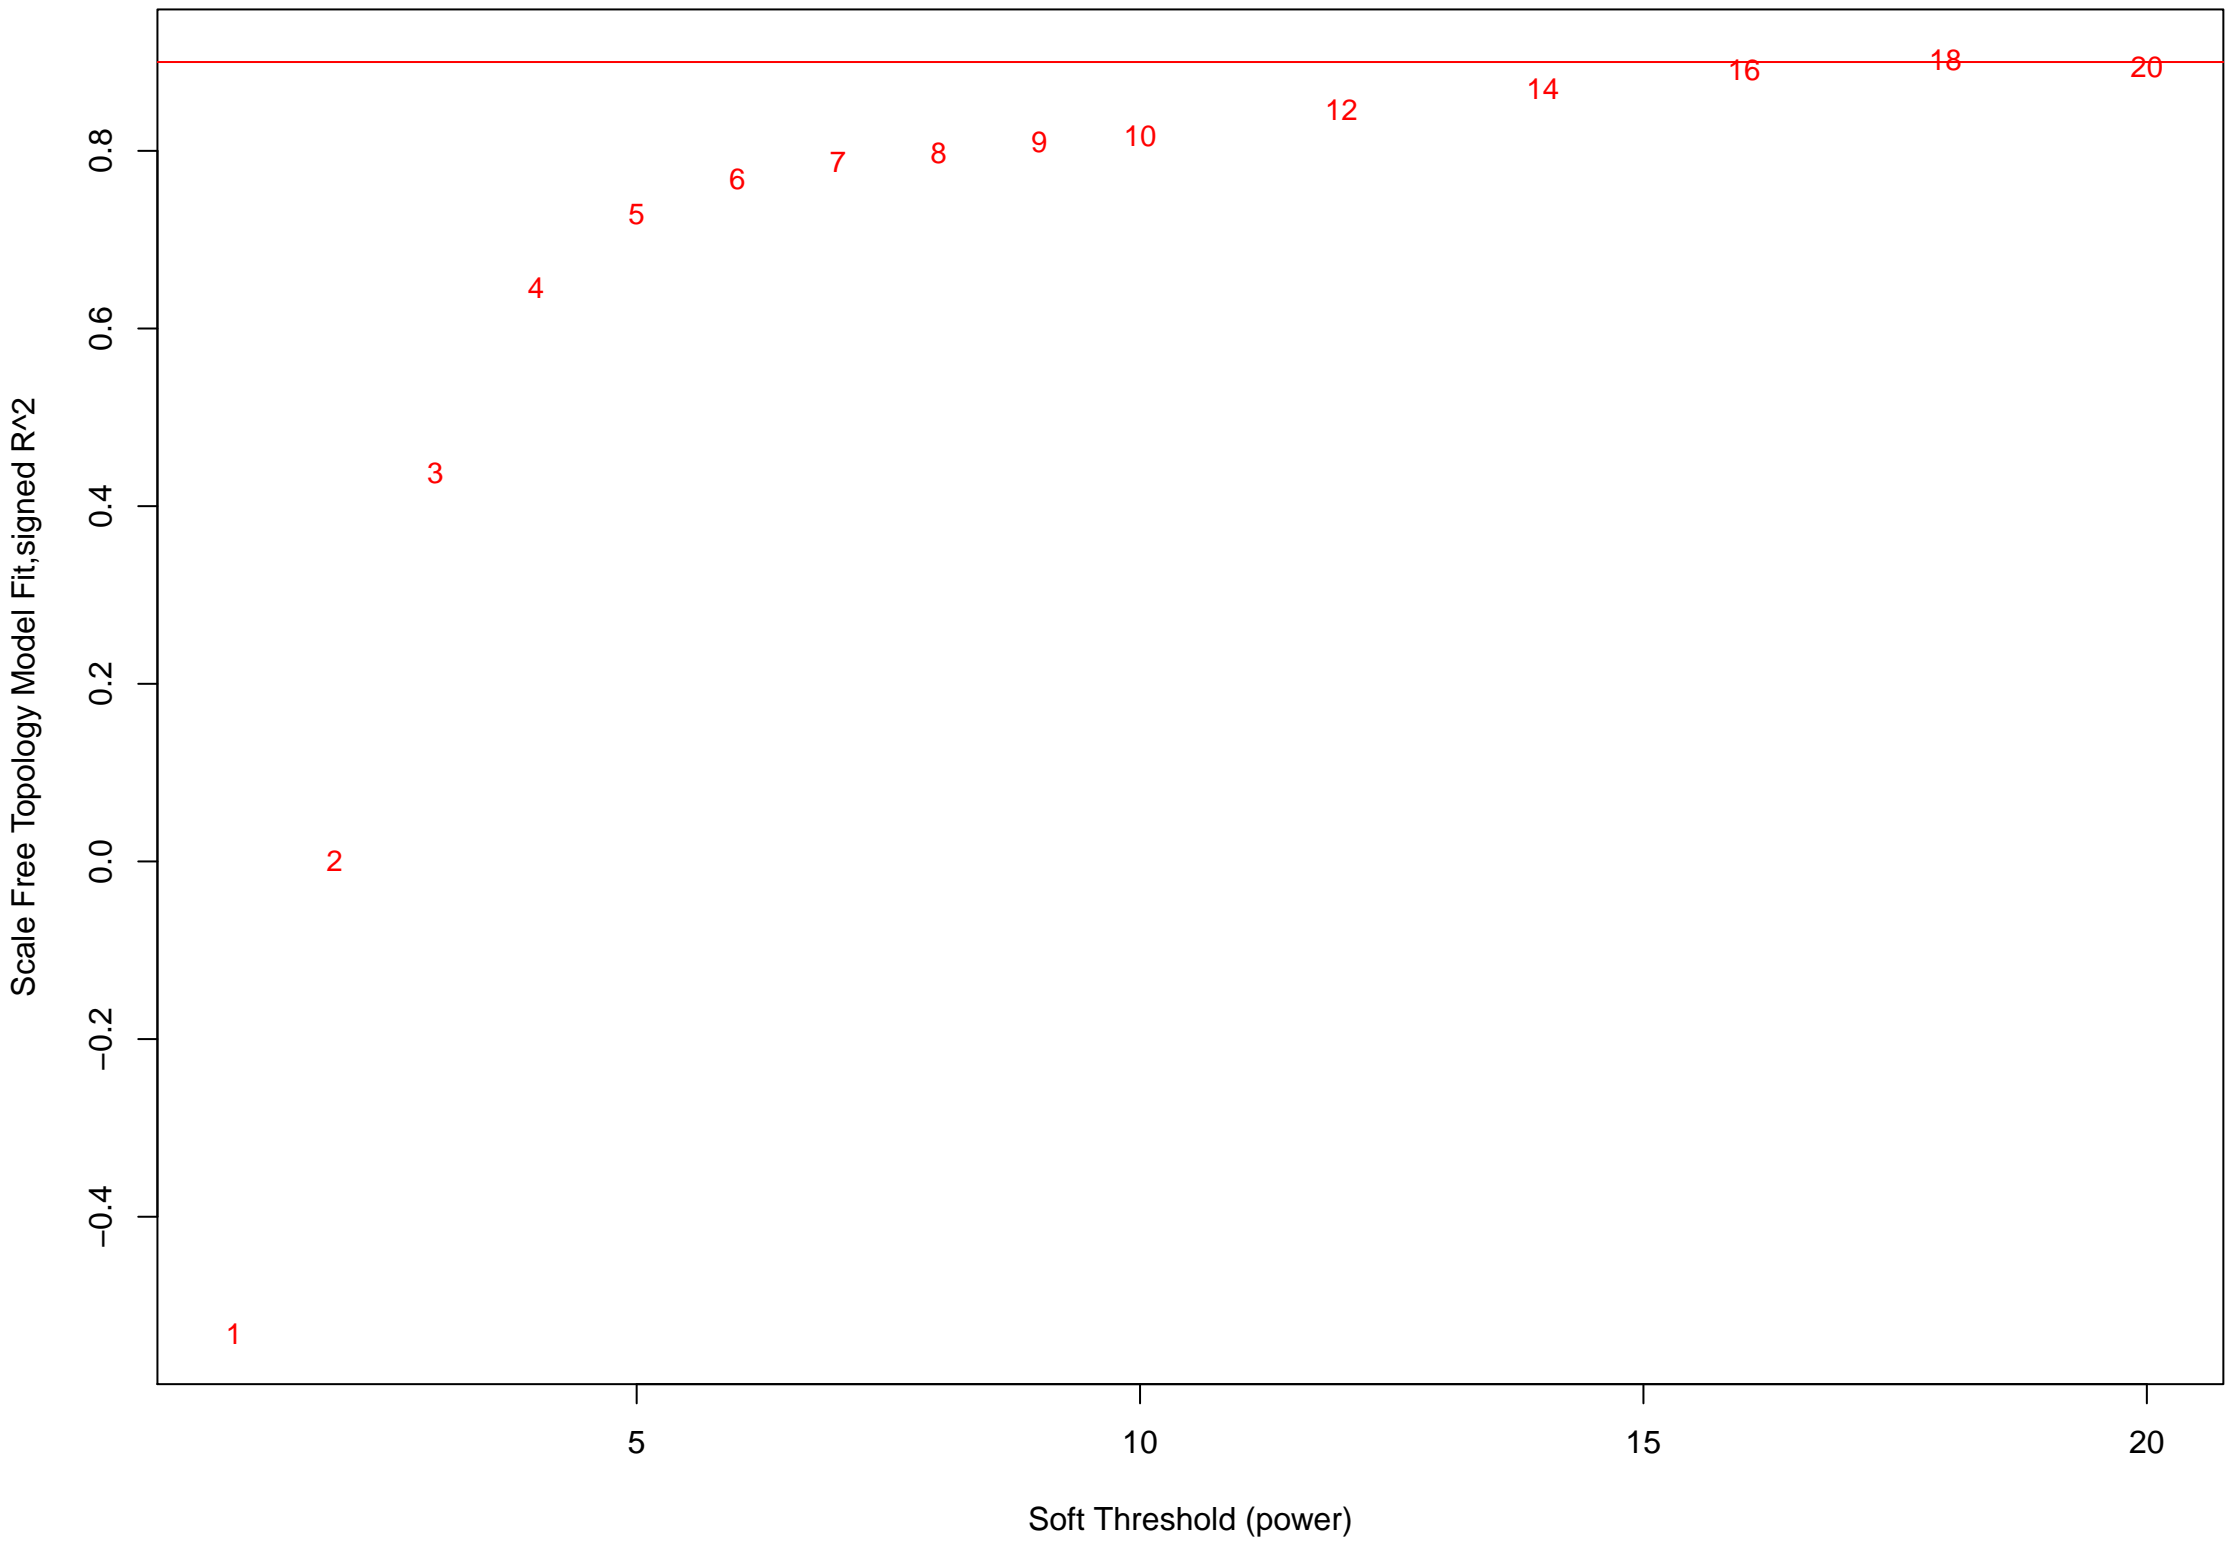

Mean connectivity

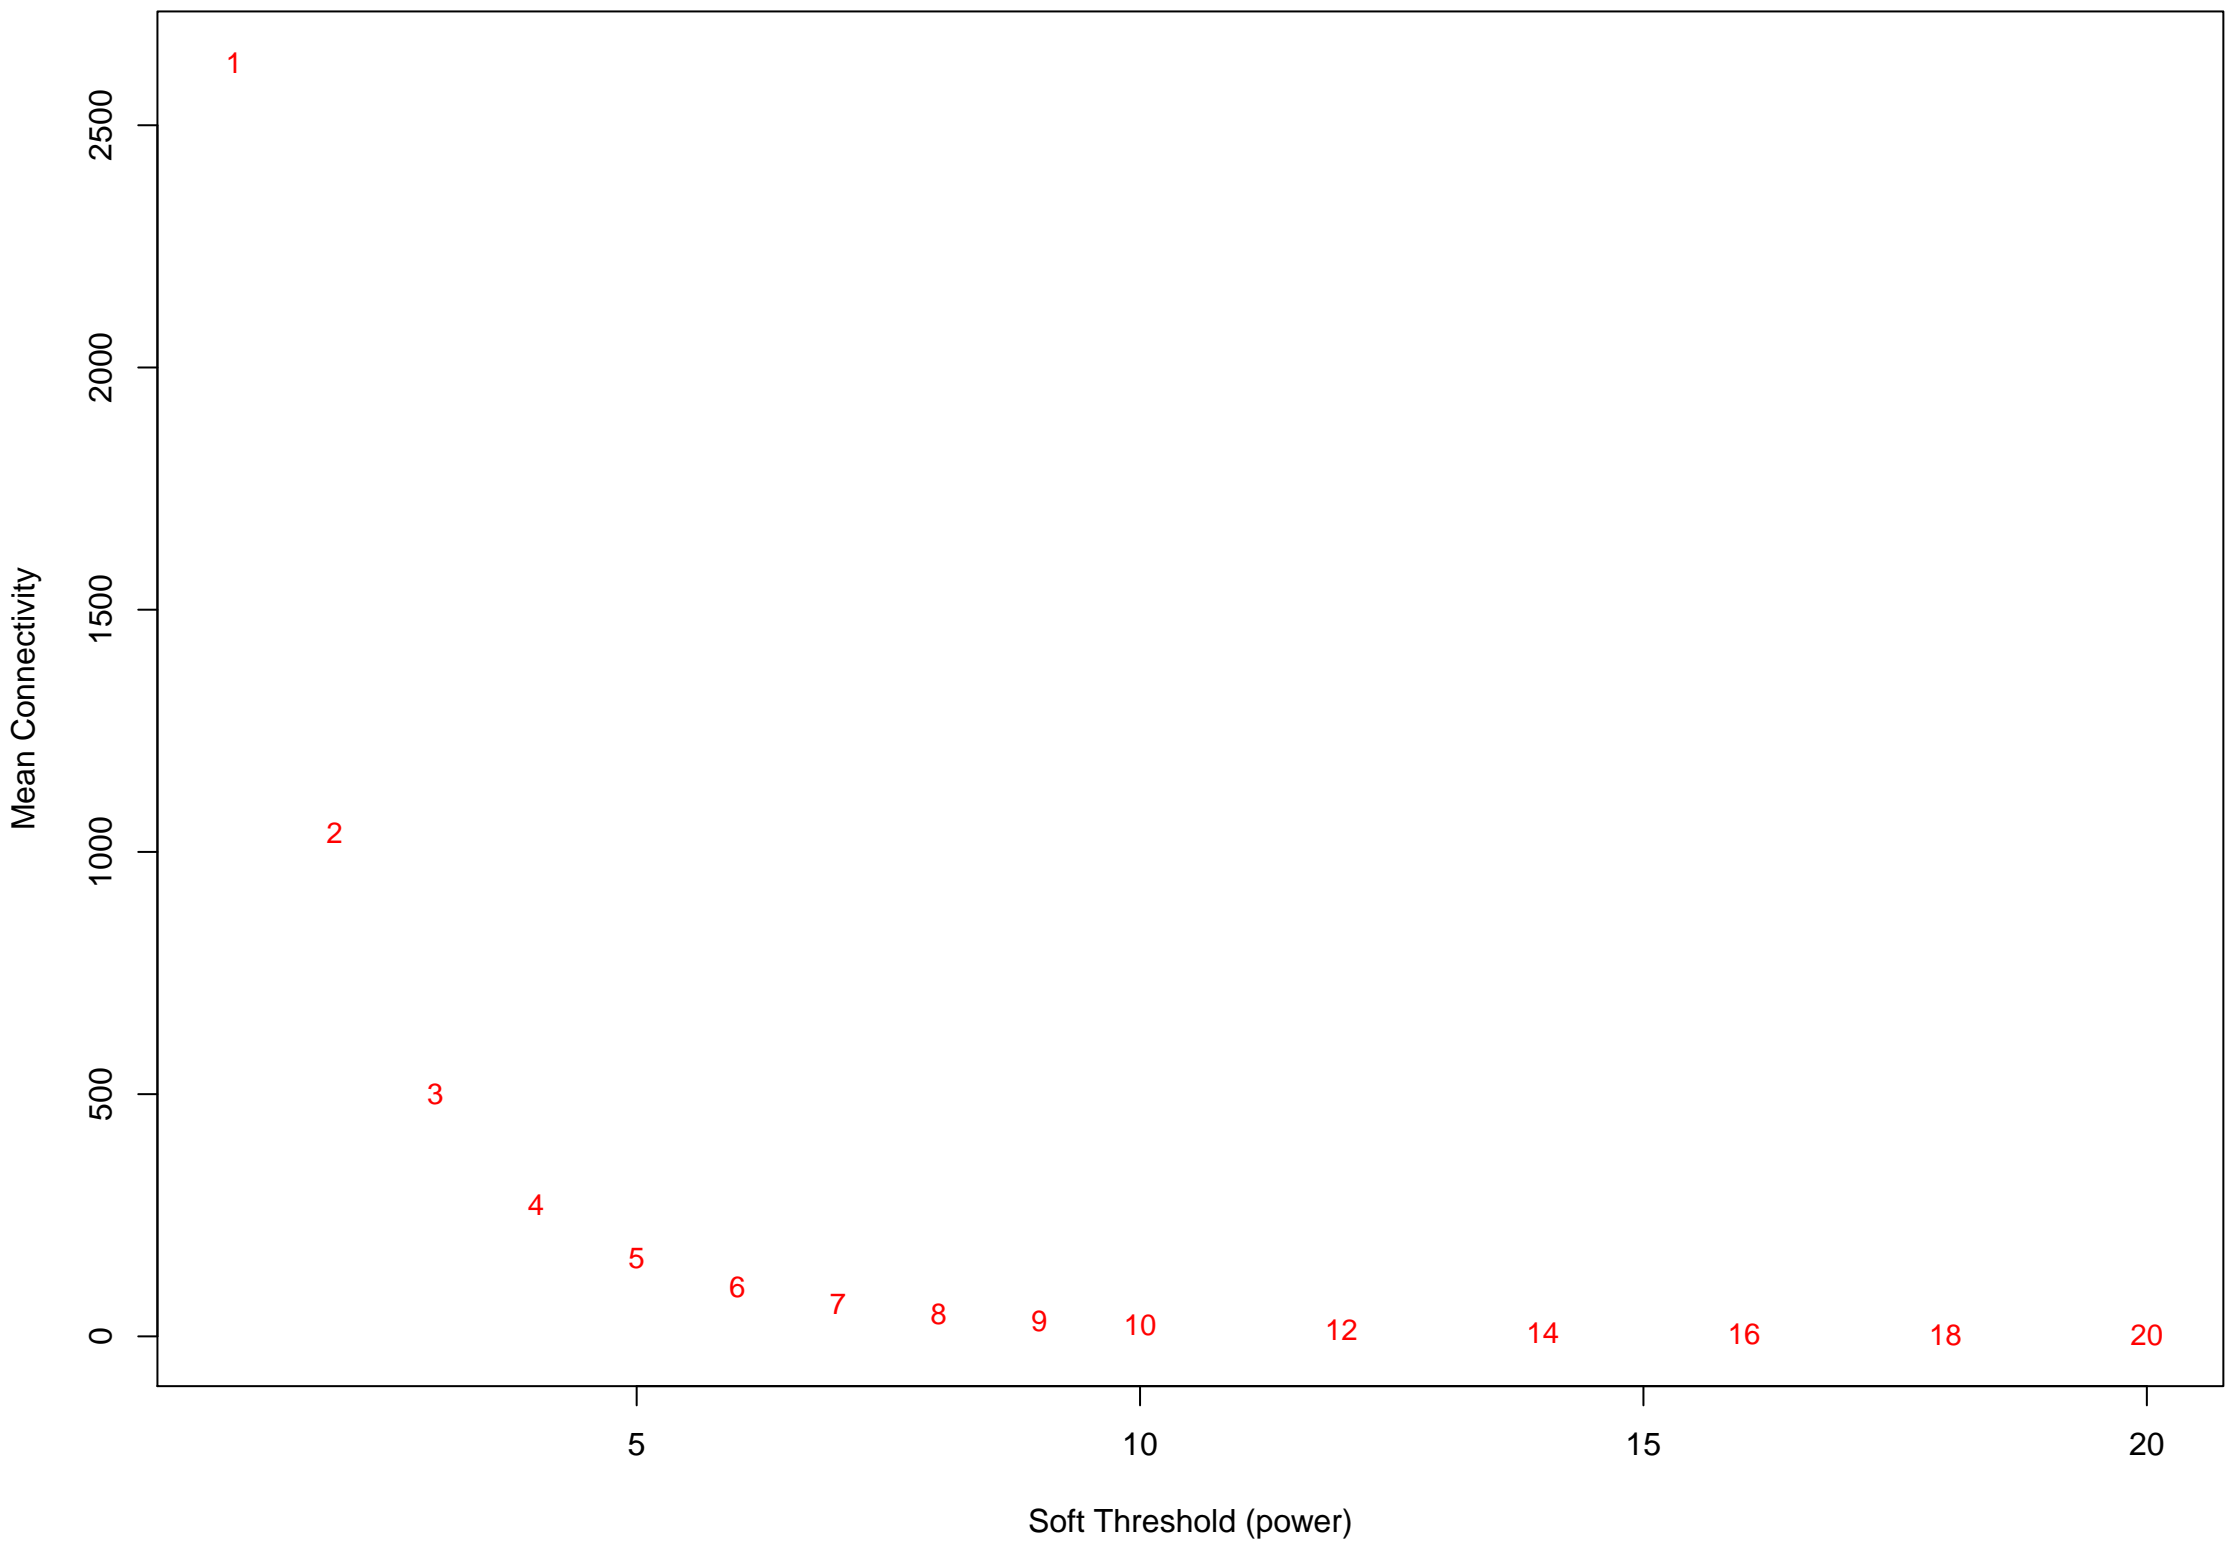

Supplement: Data_Sheet_1.zip [file Data_Sheet_1.zip]

Count

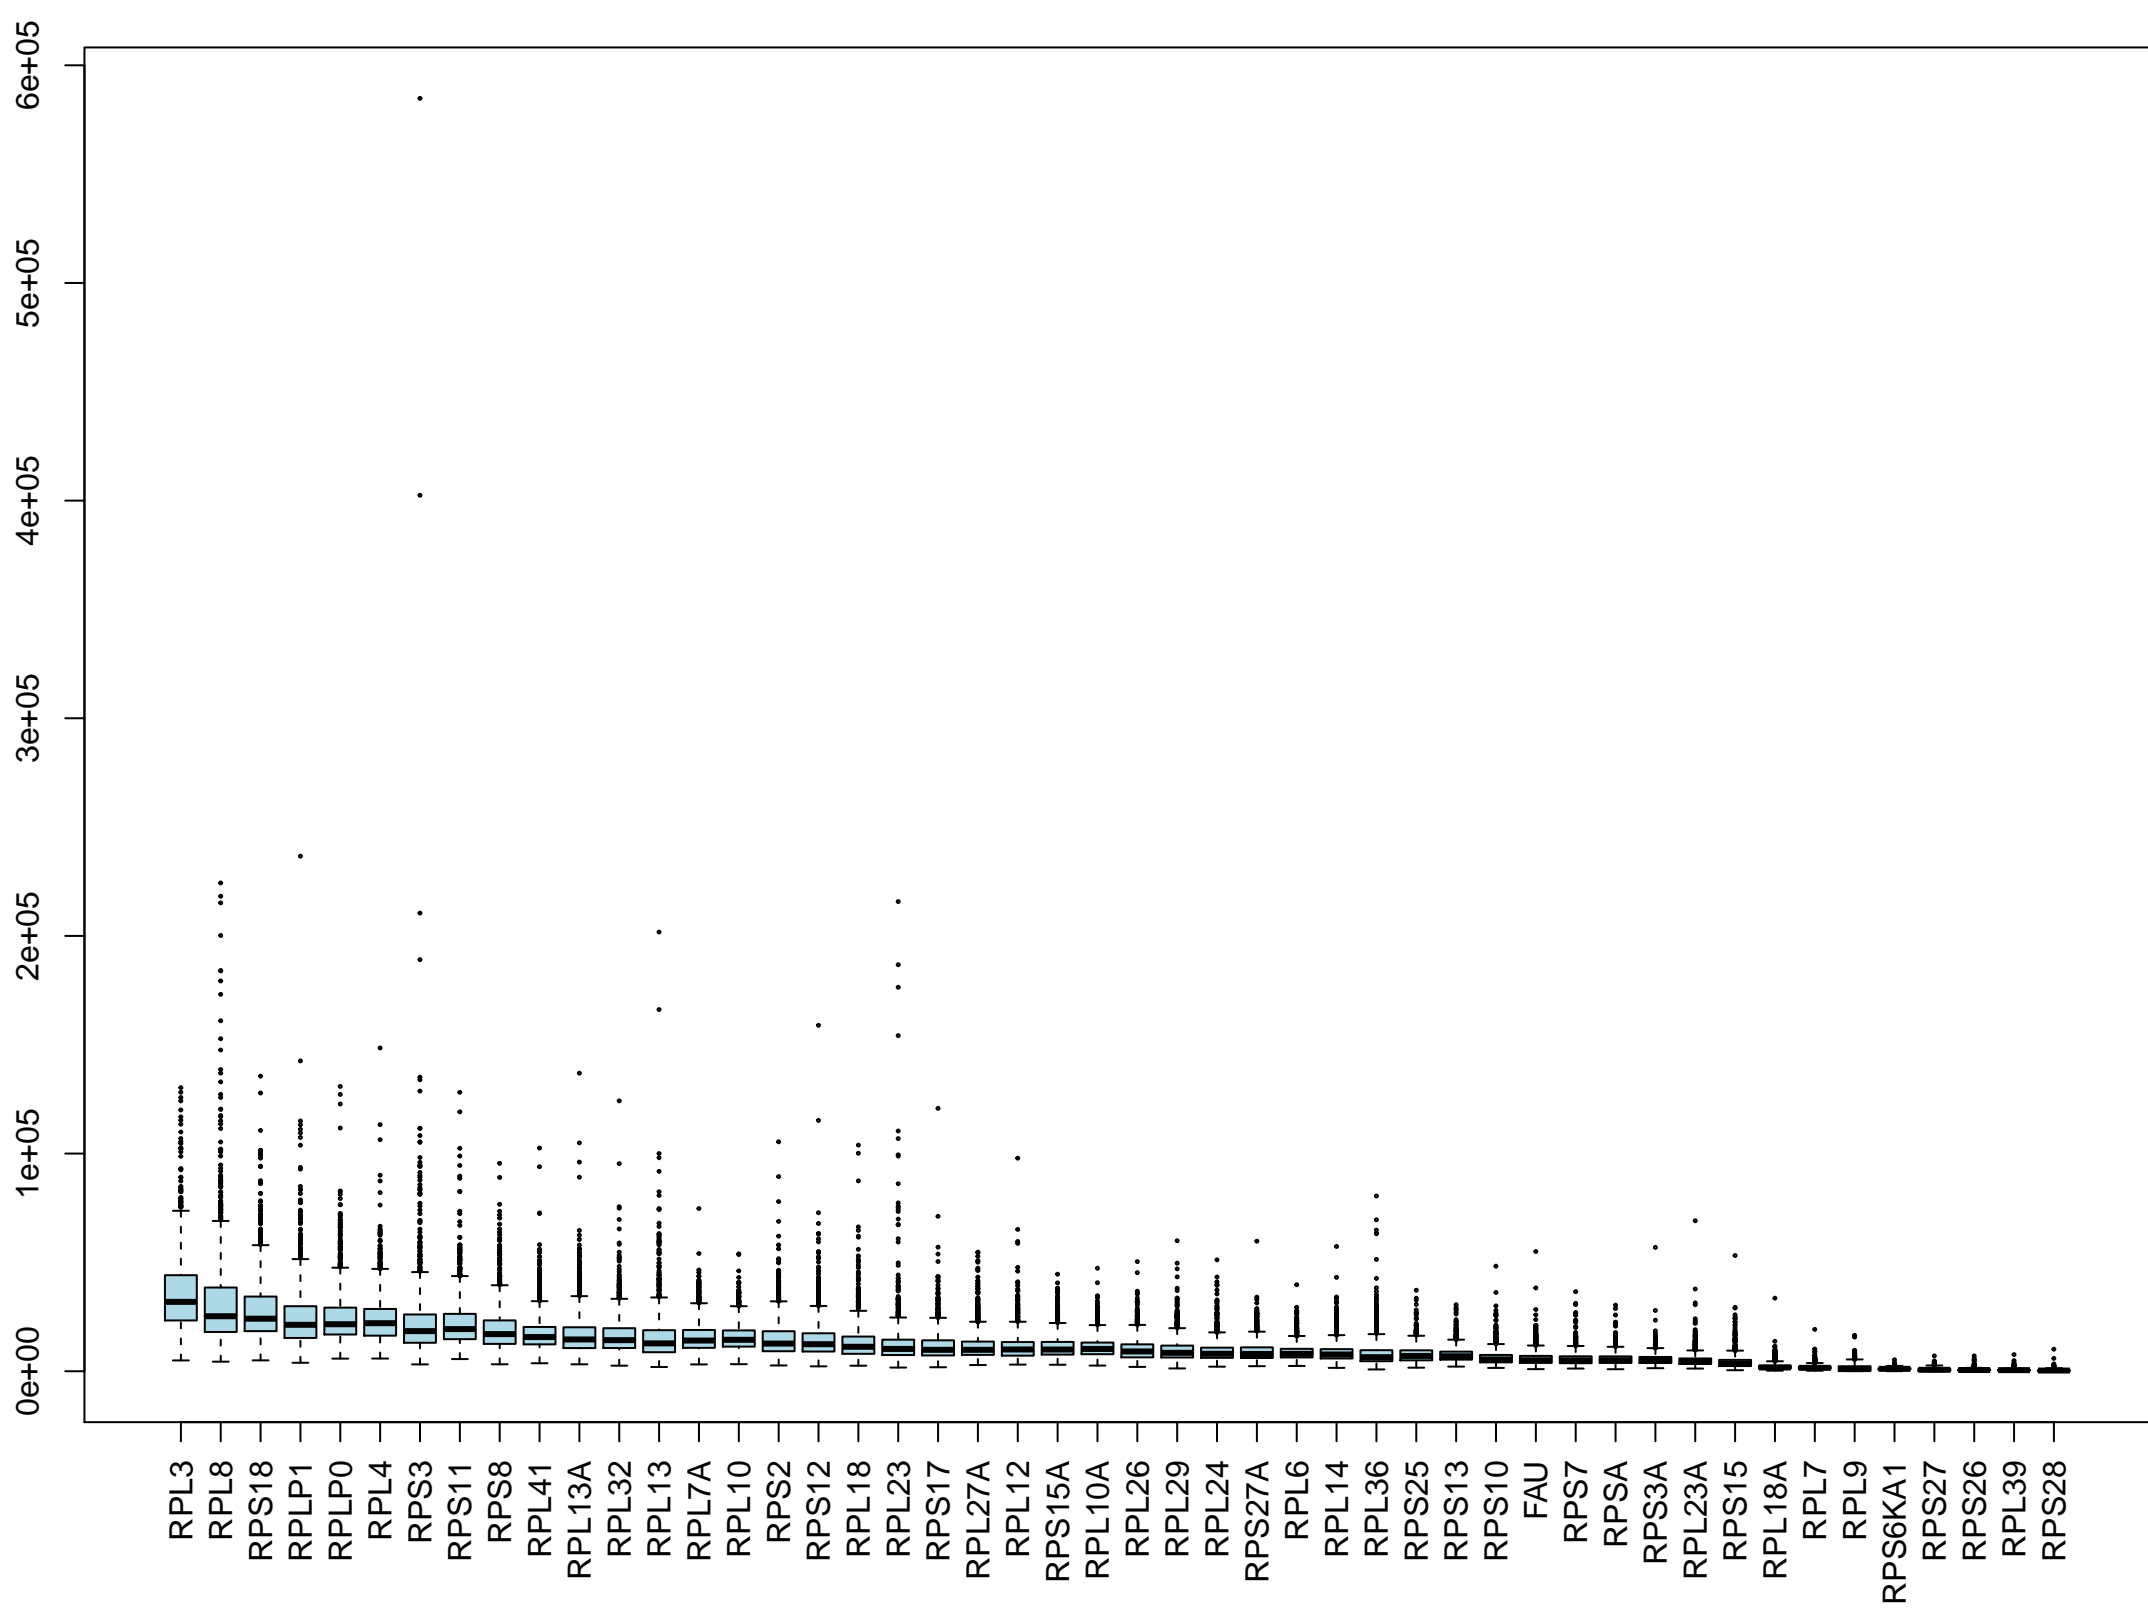

Supplement: Data_Sheet_1.zip [file Data_Sheet_1.zip]

Cluster dendrogram for BRCA

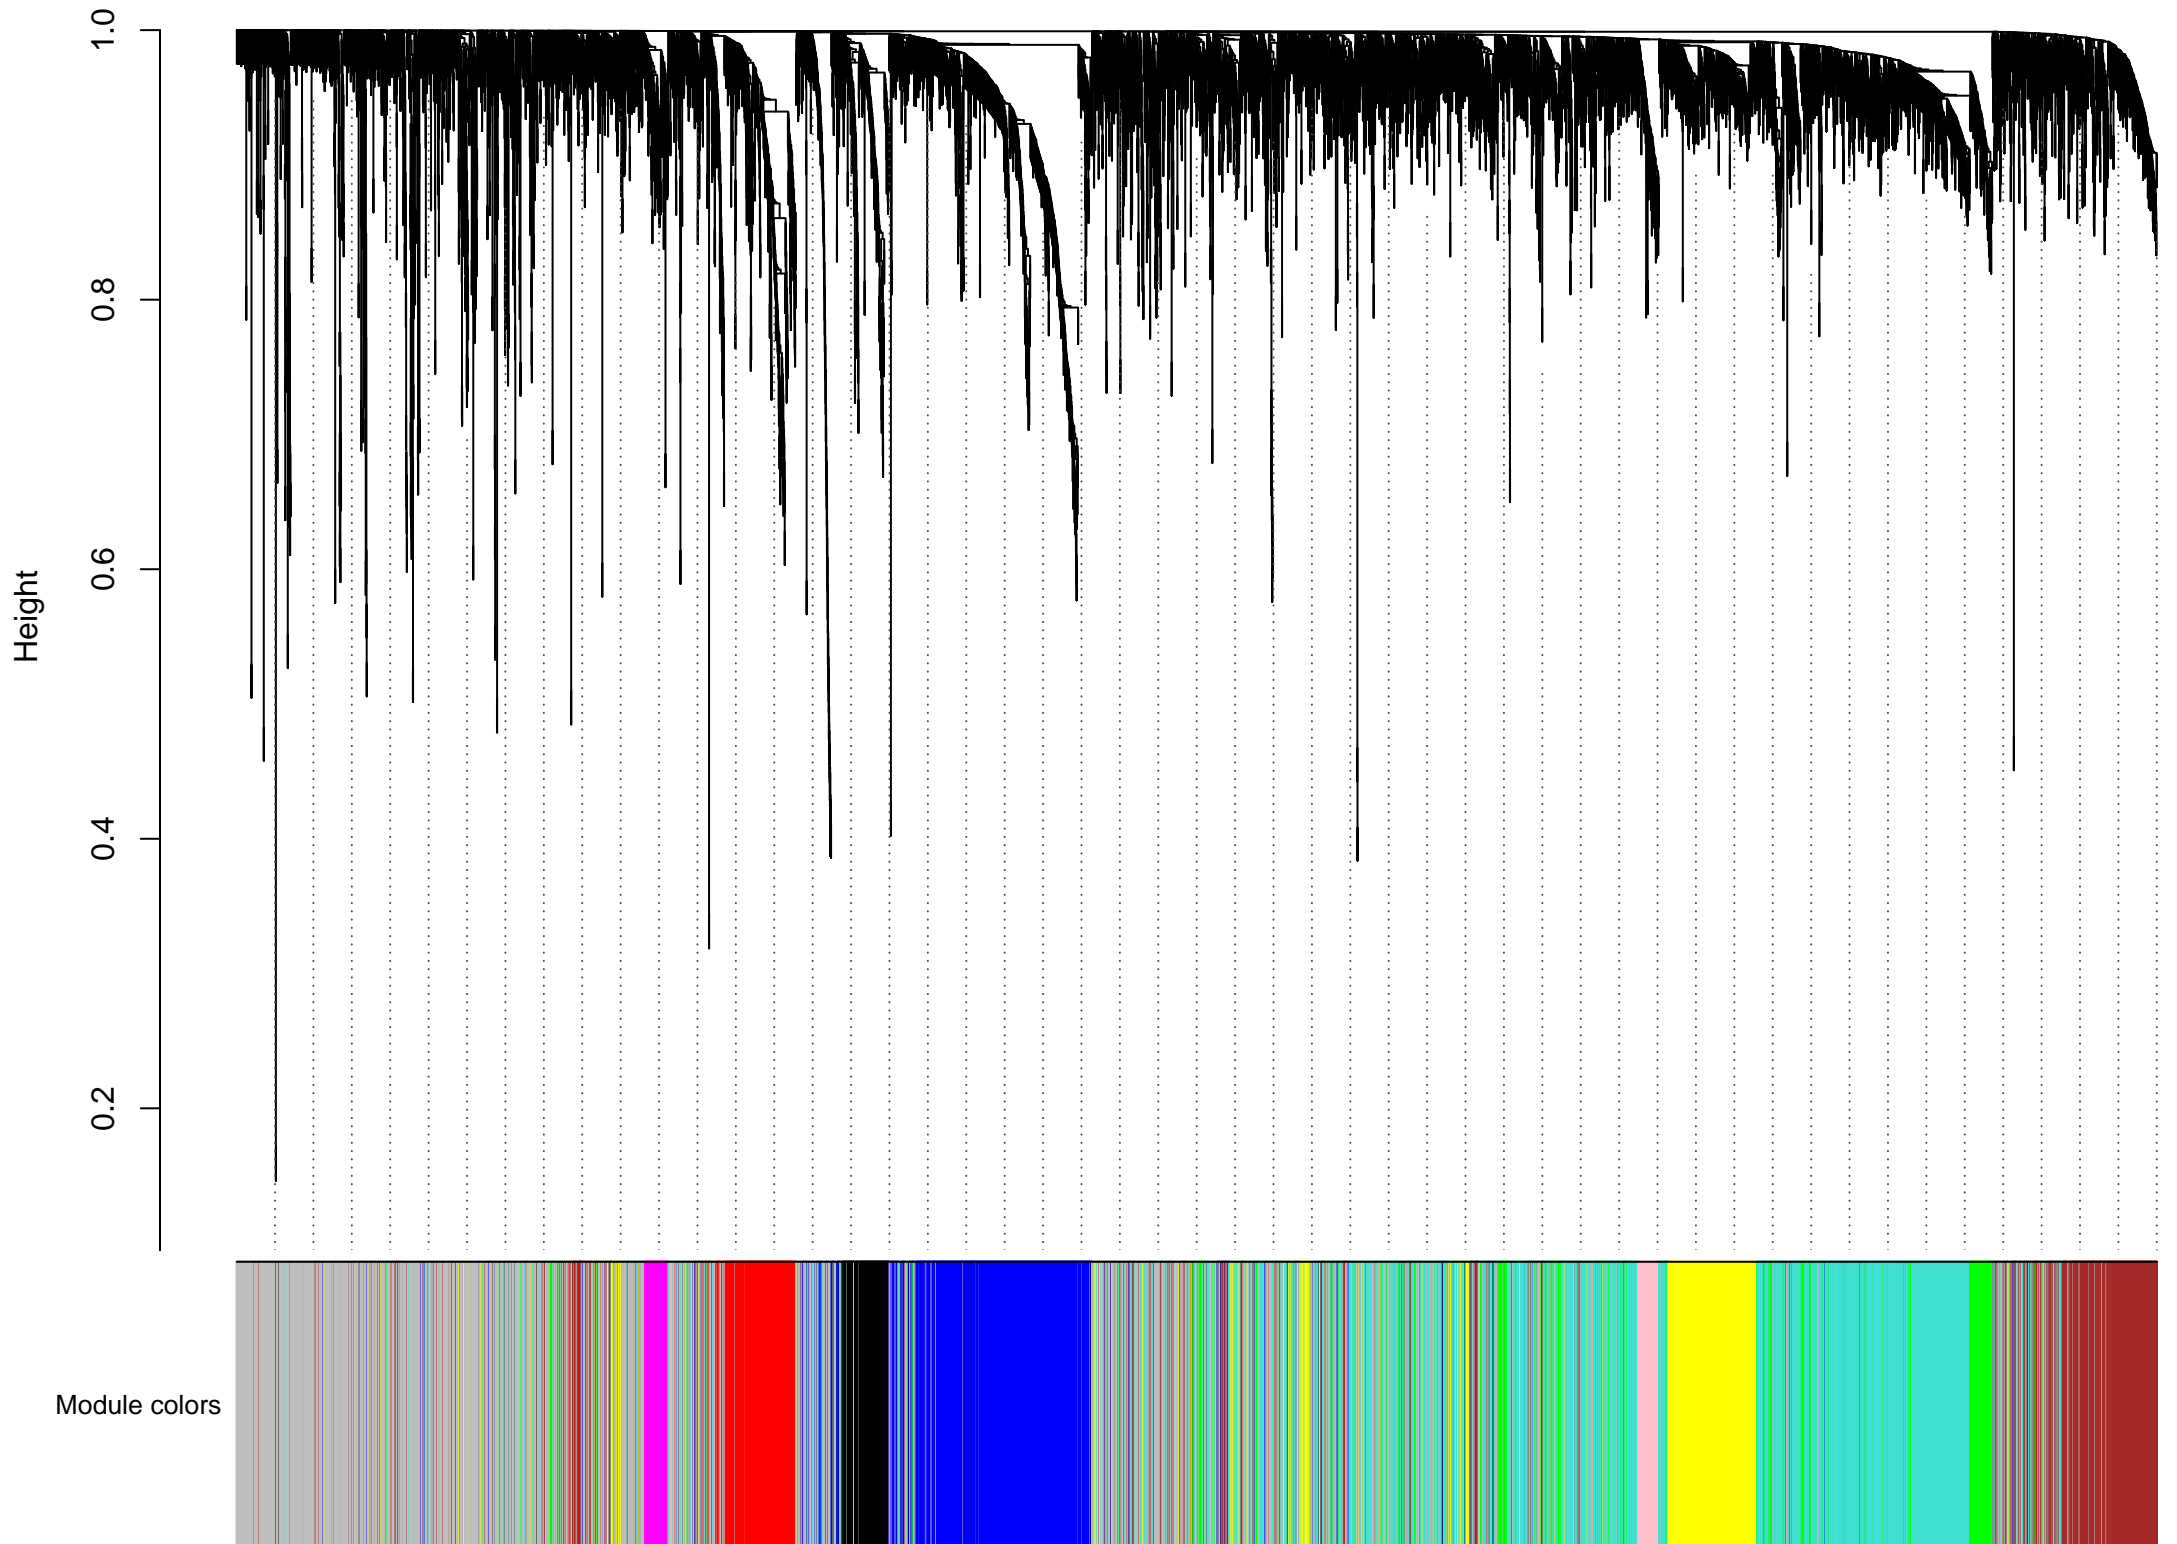

Supplement: Data_Sheet_1.zip [file Data_Sheet_1.zip]

## Scale independence

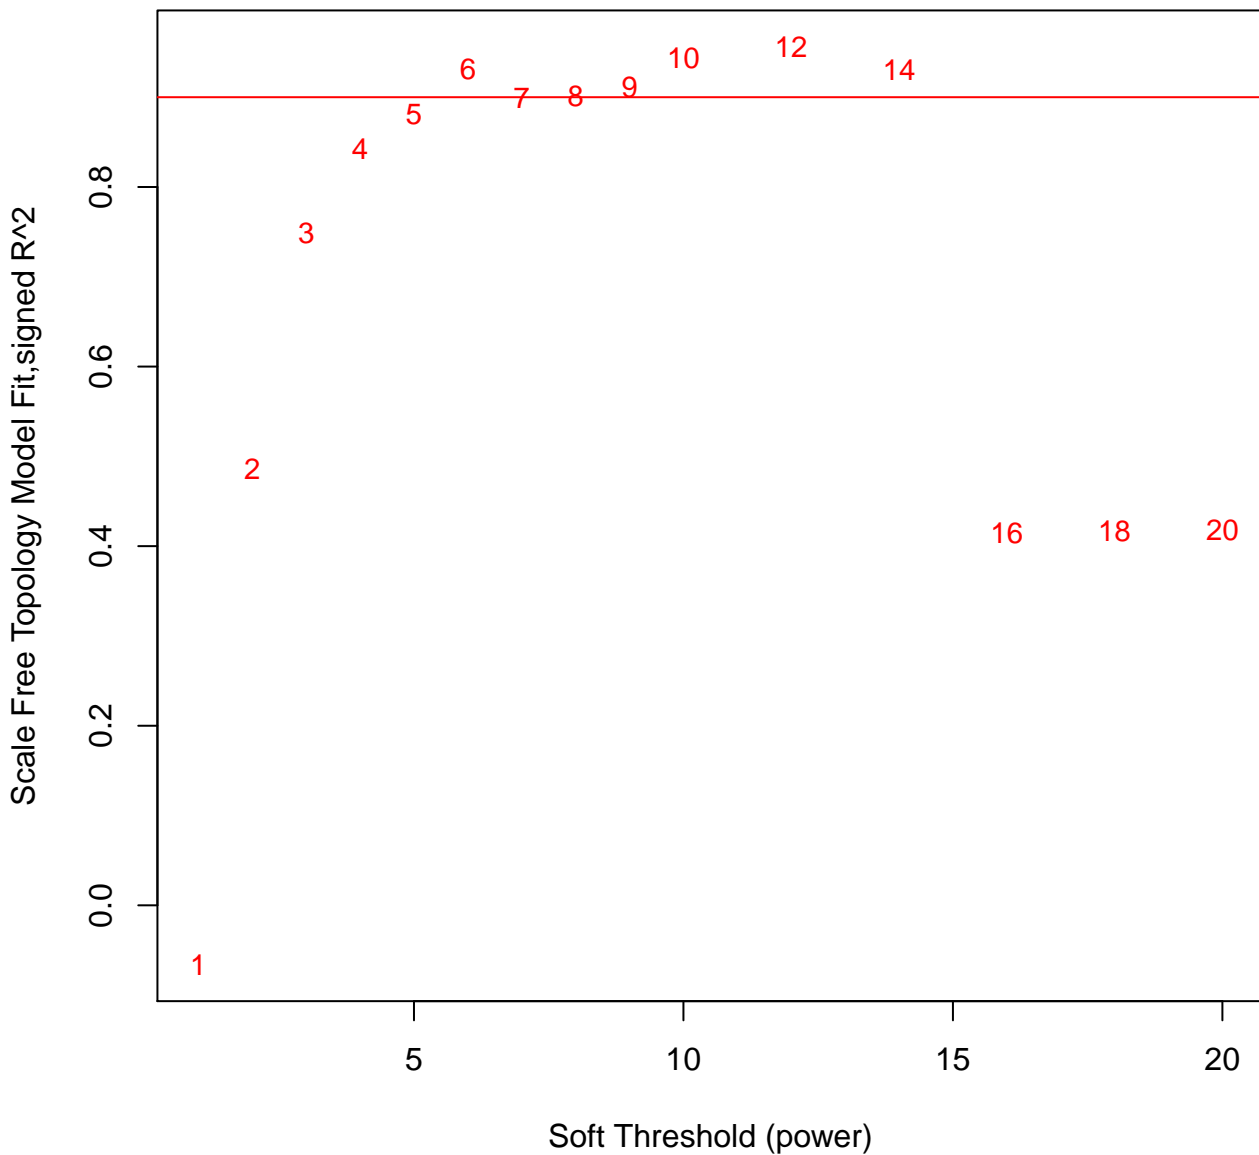

## Mean connectivity

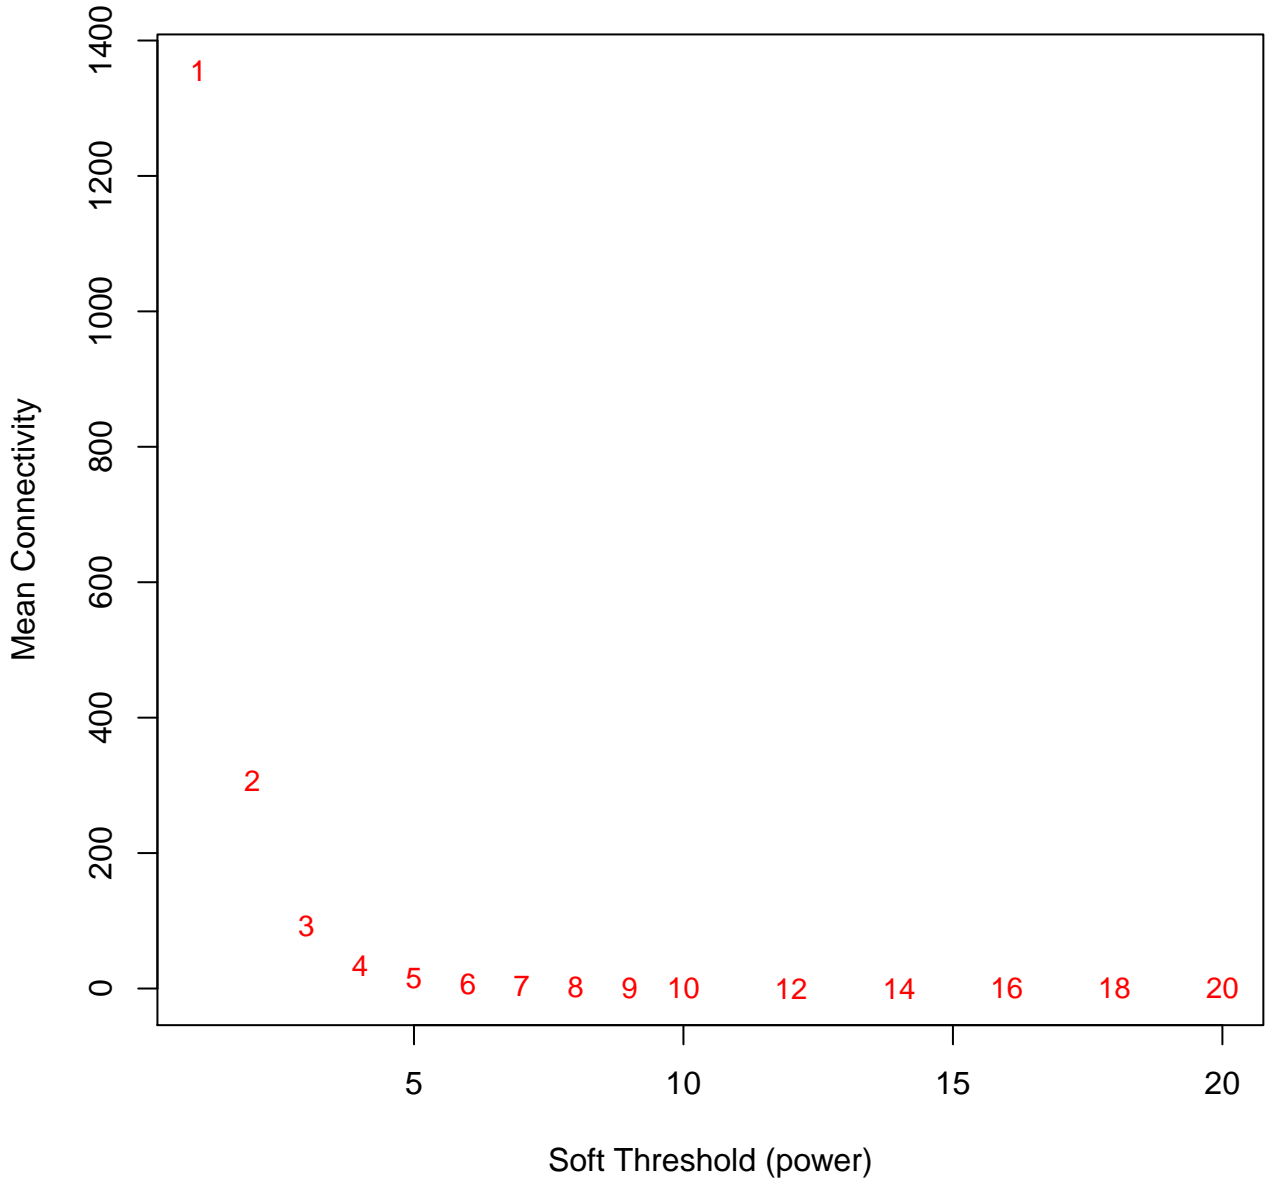

Supplement: Data_Sheet_1.zip [file Data_Sheet_1.zip]

## Scale independence

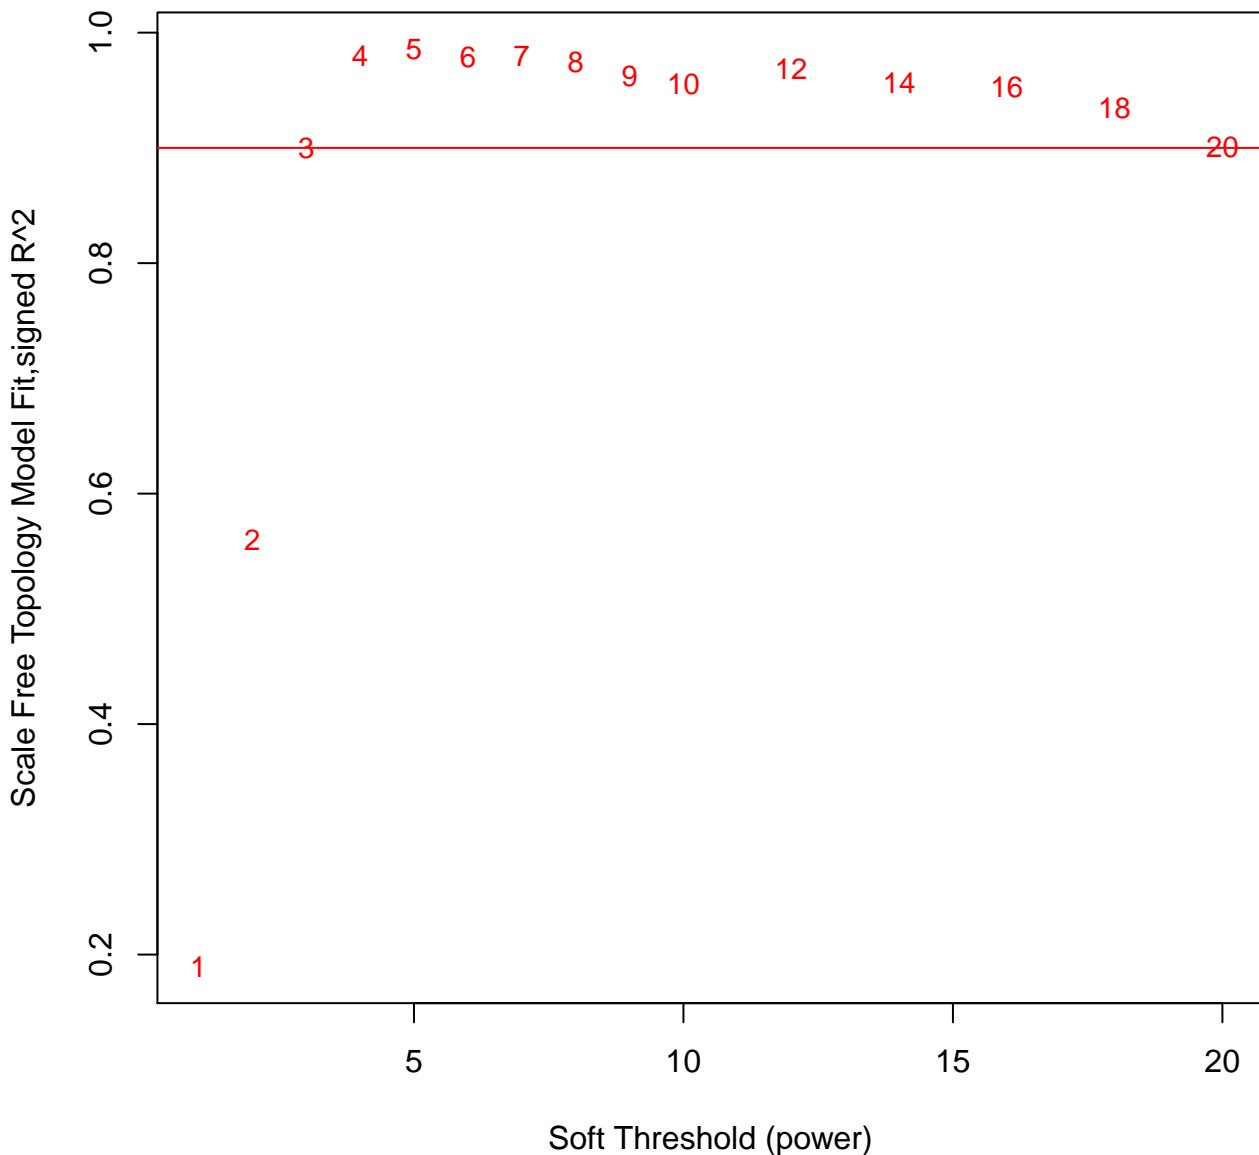

# Mean connectivity

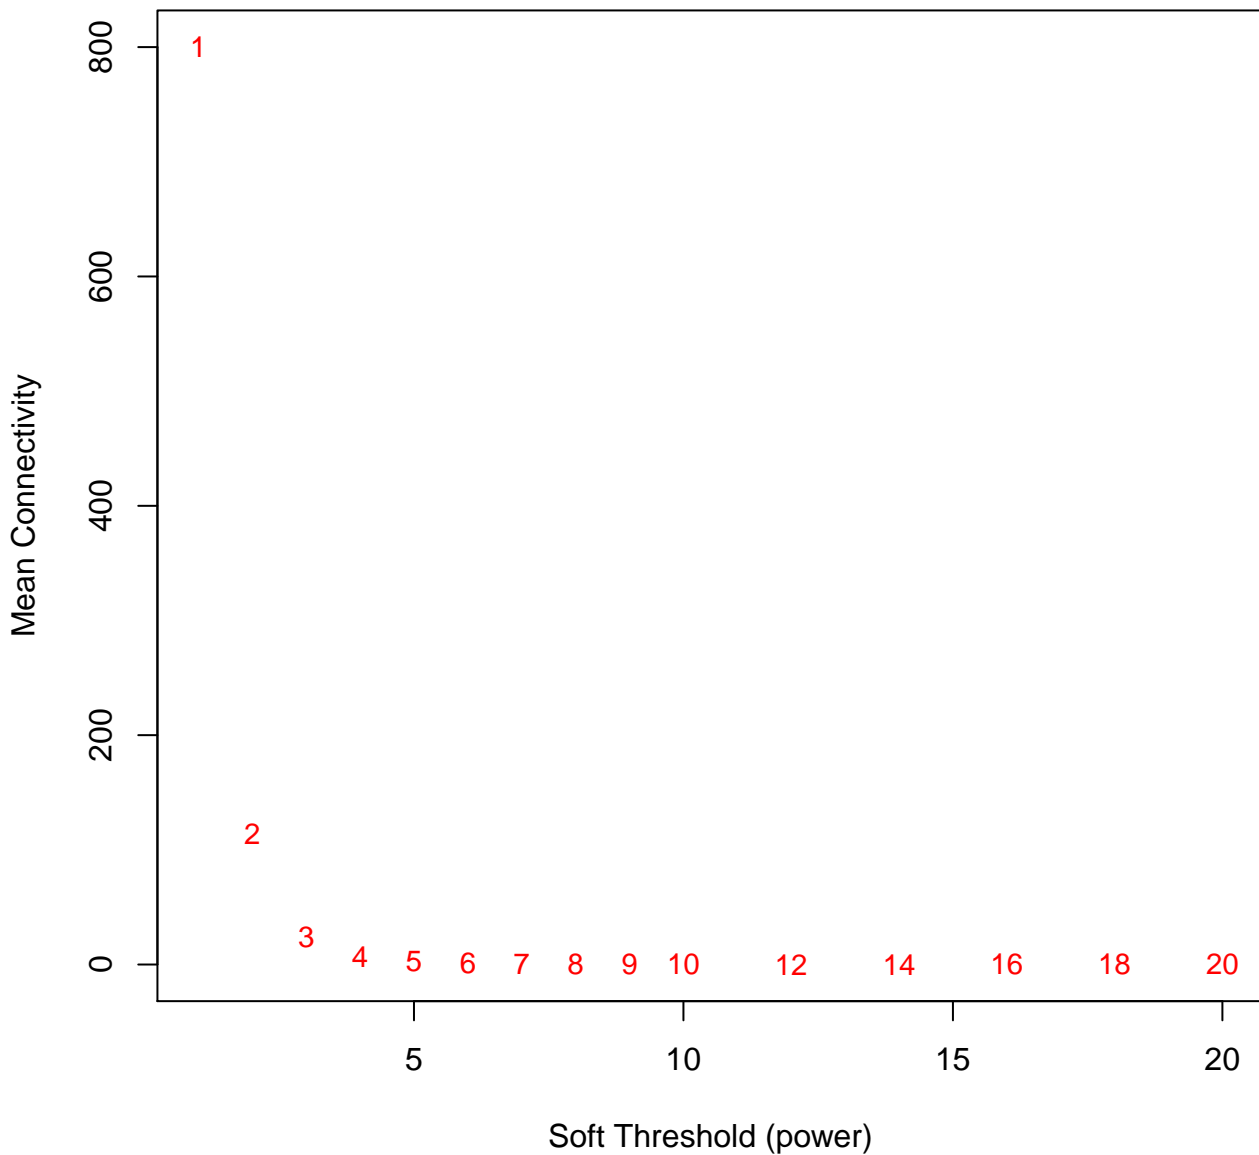

Supplement: Data_Sheet_1.zip [file Data_Sheet_1.zip]
